# Supplementary material
Source: publisher figshare collection journal article supplement (https://gsajournals.figshare.com/articles/dataset/_/14273627)
Supplement: Supplementary file 1 [file 2]

## Sheet: S. stercoralis
File S4. Top 10% of genes contributing to PCA identity in each Strongyloides species
A list of the top 10% of genes contributing to PC1 and PC2 identity for each species.
Top 10% of Genes Contributing to S. stercoralis PC1 and PC2
geneID	PC	scores	UniProtKB	Description	InterPro	GO_term	Ce_geneID	Ce_percent_homology	In.subclade_geneID	In.subclade_percent_homology	Out.subclade_geneID	Out.subclade_percent_homology	Out2.subclade_geneID	Out2.subclade_percent_homology
SSTP_0000445200	PC1	0.031	A0A0K0E4N3		PLipase_A2_His_AS, PLipase_A2_dom_sf	arachidonic acid secretion, phospholipid metabolic process, phospholipase A2 activity, extracellular region			SRAE_X000056600	66.2857			SVE_0039200	58.8571
SSTP_0000044100	PC1	0.028	A0A0K0DT81		Col_cuticle_N, Collagen	structural constituent of cuticle, membrane, integral component of membrane	col-36	55.2716	SRAE_2000157400	96.1661	SPAL_0001683300	94.5687	SVE_1804800	93.9297
SSTP_0000472100	PC1	0.028	A0A0K0E5D5		Col_cuticle_N, Collagen	structural constituent of cuticle, membrane, integral component of membrane	rol-8	65.8683	SRAE_X000003700	92.8144	SPAL_0001132600	91.018
SSTP_0001008600	PC1	0.028	A0A0K0EKU3		CRISP-related, CAP_domain, Allrgn_V5/Tpx1_CS, SCP_GAPR1-like, CAP_sf	extracellular region	F09B9.5	11.0465	SRAE_0000045600	29.0698			SVE_0646900	21.2209
SSTP_0000852400	PC1	0.028	A0A0K0EGB4		CRISP-related, CAP_domain, CAP_sf	NA			SRAE_2000129590	30.0353
SSTP_0000422100	PC1	0.027	A0A0K0E404	Zinc metalloproteinase	CUB_dom, Peptidase_M12A, Peptidase_Metallo, Metallopeptidase_nem, MetalloPept_cat_dom_sf, Astacin-like_dom, Sperma_CUB_dom_sf	molting cycle, collagen and cuticulin-based cuticle, metalloendopeptidase activity, metallopeptidase activity, proteolysis, zinc ion binding, metal ion binding, hydrolase activity, peptidase activity, extracellular region					SPAL_0000730300	44.357	SVE_0065300	47.769
SSTP_0000079900	PC1	0.027	A0A0K0DU85		Col_cuticle_N, Collagen	structural constituent of cuticle, membrane, integral component of membrane			SRAE_2000391400	97.6744	SPAL_0000314000	97.01	SVE_1586200	96.6777
SSTP_0000667700	PC1	0.027	A0A0K0EB06		NA	NA			SRAE_X000225850	55.5556
SSTP_0001119000	PC1	0.027	A0A0K0EP03		Leu-rich_rpt, Leu-rich_rpt_typical-subtyp, LRR_dom_sf	protein binding	sym-1	43	SRAE_X000251500	84.8333	SPAL_0000013100	80.8333	SVE_0617300	77
SSTP_0000442800	PC1	0.027	A0A0K0E4K8		Cys_repeat_1	NA			SRAE_X000197900	67.8481	SPAL_0000671900	60.7595	SVE_0113200	57.4684
SSTP_0001254600	PC1	0.027	A0A0K0ESW9		ShKT_dom, Haem_peroxidase_sf, Haem_peroxidase_animal, Haem_peroxidase_sf_animal	response to oxidative stress, heme binding, peroxidase activity, oxidation-reduction process, membrane, integral component of membrane, cellular oxidant detoxification	skpo-2	57.3901	SRAE_X000109800	22.7696	SPAL_0000690500	82.9561	SVE_0874200	84.1545
SSTP_0000935400	PC1	0.026	A0A0K0EIP8		Col_cuticle_N, Collagen	structural constituent of cuticle, membrane, integral component of membrane	dpy-7	63.125	SRAE_2000505000	88.125	SPAL_0000681600	86.25	SVE_0584900	89.375
SSTP_0000286800	PC1	0.026	A0A0K0E052		Col_cuticle_N, Collagen	structural constituent of cuticle, membrane, integral component of membrane			SRAE_1000243600	81.7175	SPAL_0000924800	78.9474	SVE_0029100	76.7313
SSTP_0000501000	PC1	0.026	A0A0K0E679		NA	NA	tag-297	68.5855	SRAE_X000097700	90.2961	SPAL_0000404400	88.3224	SVE_0705700	87.1711
SSTP_0000473800	PC1	0.026	A0A0K0E5F3		NA	NA	wrt-10	34.7222	SRAE_X000005600	86.1111	SPAL_0001131000	80.0926	SVE_0121000	87.963
SSTP_0001228900	PC1	0.026	A0A0K0ES61		Calycin	NA	lpr-3	64.1208	SRAE_X000229700	96.4476	SPAL_0001338200	91.6519	SVE_0110100	91.4742
SSTP_0001055500	PC1	0.026	A0A0K0EM67		MLT-10-like	membrane, integral component of membrane	mlt-10	50.6767	SRAE_X000182200	55.9398	SPAL_0001462800	82.5564	SVE_0628700	82.406
SSTP_0000147300	PC1	0.026	A0A0K0DW57		Col_cuticle_N, Collagen	structural constituent of cuticle, membrane, integral component of membrane	col-45	45
SSTP_0000422200	PC1	0.025	A0A0K0E405	Zinc metalloproteinase	CUB_dom, Peptidase_M12A, Peptidase_Metallo, Metallopeptidase_nem, MetalloPept_cat_dom_sf, Astacin-like_dom, Sperma_CUB_dom_sf	molting cycle, collagen and cuticulin-based cuticle, metalloendopeptidase activity, metallopeptidase activity, proteolysis, zinc ion binding, metal ion binding, hydrolase activity, peptidase activity, extracellular region	nas-38	20			SPAL_0000730500	45.1948	SVE_0345600	30.9091
SSTP_0000865400	PC1	0.025	A0A0K0EGP3		FAD/NAD-bd_sf	NA
SSTP_0000112300	PC1	0.025	A0A0K0DV55		Col_cuticle_N, Collagen	structural constituent of cuticle, membrane, integral component of membrane	rol-6	48.2558	SRAE_2000470400	83.4302	SPAL_0001376300	81.686	SVE_0571100	81.3953
SSTP_0001226800	PC1	0.025	A0A0K0ES39		NA	NA
SSTP_0001233600	PC1	0.025	A0A0K0ESA7		NA	NA			SRAE_X000132200	64.4828	SPAL_0000106200	64.8276	SVE_0132400	58.2759
SSTP_0001008700	PC1	0.025	A0A0K0EKU4		CRISP-related, CAP_domain, Allrgn_V5/Tpx1_CS, SCP_GAPR1-like, CAP_sf	extracellular region	F09B9.5	11.4369	SRAE_0000045600	30.4985			SVE_0646900	21.9941
SSTP_0000260900	PC1	0.025	A0A0K0DZE5		NA	NA			SRAE_2000437400	76.0417
SSTP_0000592800	PC1	0.025	A0A0K0E8U5		Ground-like_dom	NA			SRAE_1000285400	74.6377	SPAL_0001516000	65.7005	SVE_0835500	67.6329
SSTP_0000742500	PC1	0.024	A0A0K0ED62		Col_cuticle_N, Collagen	structural constituent of cuticle, membrane, integral component of membrane	rol-6	43.2624	SRAE_2000385900	79.4326	SPAL_0000423100	75.4137	SVE_1642300	78.2506
SSTP_0000696300	PC1	0.024	A0A0K0EBU3		Pepsin-I3, Pepsin-I3_sf	NA	R01E6.2	35.5828	SRAE_2000390400	80.3681	SPAL_0000875300	80.3681	SVE_0729900	76.6871
SSTP_0001118000	PC1	0.024	A0A0K0ENZ3		Pan_app	NA	H42K12.3	24.3644	SRAE_X000259200	71.822
SSTP_0000350400	PC1	0.023	A0A0K0E1Y5		Reeler_dom	membrane, integral component of membrane			SRAE_X000160900	87.9581	SPAL_0001282600	78.534	SVE_1699800	75.9162
SSTP_0001229000	PC1	0.023	A0A0K0ES62		Calycin	NA	lpr-6	51.1029	SRAE_X000229600	90.0735	SPAL_0001338100	87.8676	SVE_0110000	84.9265
SSTP_0000300500	PC1	0.023	A0A0K0E0J1		NA	membrane, integral component of membrane
SSTP_0000856400	PC1	0.023	A0A0K0EGF3		Col_cuticle_N, Collagen	structural constituent of cuticle, membrane, integral component of membrane	dpy-9	46.3068			SPAL_0001678400	75.5682
SSTP_0000831500	PC1	0.023	A0A0K0EFQ5		AdipoR/HlyIII-related	integral component of membrane, membrane	paqr-3	46.319	SRAE_X000194900	86.8098	SPAL_0001436500	85.8896	SVE_0301200	85.2761
SSTP_0000260800	PC1	0.023	A0A0K0DZE3		GPCR_Rhodpsn_7TM	integral component of membrane, membrane			SRAE_2000437500	41.2399	SPAL_0000935900	41.779
SSTP_0000647700	PC1	0.023	A0A0K0EAF2		DUF1647	NA			SRAE_2000522200	66.076	SPAL_0000721400	64.8101	SVE_1076800	65.8228
SSTP_0000060300	PC1	0.023	A0A0K0DTP0		NA	NA	F56D3.1	27.6371	SRAE_X000202400	75.9494	SPAL_0001306700	69.4093	SVE_0357500	61.1814
SSTP_0000354300	PC1	0.023	A0A0K0E223	Guanylate cyclase	Prot_kinase_dom, A/G_cyclase, Ser-Thr/Tyr_kinase_cat_dom, ANF_lig-bd_rcpt, Kinase-like_dom_sf, A/G_cyclase_CS, Peripla_BP_I, Nucleotide_cyclase	intracellular signal transduction, cyclic nucleotide biosynthetic process, phosphorus-oxygen lyase activity, protein phosphorylation, protein kinase activity, ATP binding, nucleotide binding, membrane, integral component of membrane, guanylate cyclase activity, cGMP biosynthetic process, lyase activity	gcy-23	55.9397	SRAE_2000430600	85.8156	SPAL_0000507700	82.8014	SVE_0379700	83.8652
SSTP_0000199900	PC1	0.023	A0A0K0DXN4		DB	NA	F35B3.4	34.9345	SRAE_2000518500	89.9563	SPAL_0000686700	80.3493	SVE_1328600	81.6594
SSTP_0000850000	PC1	0.023	A0A0K0EG90		NA	NA
SSTP_0001131000	PC1	0.023	A0A0K0EPC6		NA	membrane, integral component of membrane	F31C3.6	17.4894
SSTP_0000284800	PC1	0.022	A0A0K0E031		Fungal_lipase-like, AB_hydrolase	lipid metabolic process, hydrolase activity	K08B12.1	41.3793	SRAE_1000241700	92.3077	SPAL_0000559000	92.0424	SVE_0032700	92.3077
SSTP_0000060800	PC1	0.022	A0A0K0DTP5		CRISP-related, CAP_domain, CAP_sf	NA			SRAE_2000052500	67.4286	SPAL_0000643800	51.4286	SVE_1794700	52.5714
SSTP_0000938300	PC1	0.022	A0A0K0EIS7		ShKT_dom	NA			SRAE_2000494600	67.9724	SPAL_0001716700	62.9032	SVE_0377000	62.4424
SSTP_0000486700	PC1	0.022	A0A0K0E5T3		Calycin	NA	lpr-4	63.4921	SRAE_X000019200	93.6508	SPAL_0000071100	92.5926	SVE_0908100	87.8307
SSTP_0000061700	PC1	0.022	A0A0K0DTQ3		ZP_dom, Pan_app	membrane, integral component of membrane	noah-2	74.2667	SRAE_X000164700	96.8	SPAL_0000374700	96.4	SVE_0306200	96.4
SSTP_0001185300	PC1	0.022	A0A0K0EQX2		Ground-like_dom	NA					SPAL_0000172200	74.7573
SSTP_0001186900	PC1	0.022	A0A0K0EQY7		CPG4	NA	B0365.9	40.796	SRAE_1000233500	83.5821	SPAL_0000170400	81.0945
SSTP_0001121300	PC1	0.022	A0A0K0EP26		Carotenoid_Oase	oxidoreductase activity, acting on single donors with incorporation of molecular oxygen, incorporation of two atoms of oxygen, oxidation-reduction process, metal ion binding	F49E10.2	43.6871	SRAE_X000253800	79.7765	SPAL_0001090000	63.5754	SVE_0619700	70.1676
SSTP_0000288700	PC1	0.022	A0A0K0E070		FAD/NAD-bd_sf	NA			SRAE_X000144300	91.4286	SPAL_0000385400	91.7143	SVE_1905100	90.8571
SSTP_0000997800	PC1	0.022	A0A0K0EKI4		NA	NA	K08D12.4	76.5152	SRAE_X000076300	96.2121	SPAL_0000198200	89.3939	SVE_0042900	88.6364
SSTP_0000505900	PC1	0.022	A0A0K0E6C8		Sulfotransferase, Chst-1	positive regulation of response to oxidative stress, chondroitin sulfate biosynthetic process, chondroitin 4-sulfotransferase activity, sulfotransferase activity, integral component of membrane, membrane			SRAE_2000507400	44.8598	SPAL_0000593900	37.3832	SVE_0354700	36.7601
SSTP_0001234700	PC1	0.022	A0A0K0ESB8		Col_cuticle_N, Collagen	structural constituent of cuticle, membrane, integral component of membrane	col-117	54.8571			SPAL_0000110500	84.5714
SSTP_0000092900	PC1	0.022	A0A0K0DUL5		Ground-like_dom	membrane, integral component of membrane	grd-5	59.0909	SRAE_2000404200	83.6364	SPAL_0000497500	70.9091	SVE_0700800	79.0909
SSTP_0000270800	PC1	0.022	A0A0K0DZP6		NA	NA
SSTP_0000419500	PC1	0.022	A0A0K0E3X5		NA	NA			SRAE_2000379400	68.0916	SPAL_0000320300	63.5115	SVE_1580000	62.9008
SSTP_0000831600	PC1	0.021	A0A0K0EFQ6		3Beta_OHSteriod_DH/Estase, NAD(P)-bd_dom_sf	steroid biosynthetic process, 3-beta-hydroxy-delta5-steroid dehydrogenase activity, oxidoreductase activity, acting on the CH-OH group of donors, NAD or NADP as acceptor, oxidation-reduction process, oxidoreductase activity	C32D5.12	23.3161	SRAE_X000194800	79.7927	SPAL_0001436400	72.2798	SVE_0301300	73.057
SSTP_0000695500	PC1	0.021	A0A0K0EBT5		NA	NA			SRAE_2000519600	71.7037	SPAL_0000876100	62.0741	SVE_0729100	62.5185
SSTP_0000681700	PC1	0.021	A0A0K0EBE6		NA	NA			SRAE_2000480300	80.3191	SPAL_0000060400	76.5957	SVE_0246500	76.5957
SSTP_0000649200	PC1	0.021	A0A0K0EAG7	Carboxylic ester hydrolase	Cholinesterase, CarbesteraseB, Lipase_GDXG_HIS_AS, Carboxylesterase_B_AS, AB_hydrolase	hydrolase activity, cholinesterase activity			SRAE_2000523600	70.2936			SVE_1439900	46.9775
SSTP_0000848500	PC1	0.021	A0A0K0EG75		DB	NA	dao-2	54.7945	SRAE_X000204800	85.6164	SPAL_0001309100	84.2466	SVE_0359900	84.9315
SSTP_0001254400	PC1	0.021	A0A0K0ESW7		C-type_lectin-like, C-type_lectin-like/link_sf, CTDL_fold	NA			SRAE_X000110000	72.673	SPAL_0000690700	63.1265	SVE_0874000	62.6492
SSTP_0000852500	PC1	0.021	A0A0K0EGB5		CRISP-related, CAP_domain, CAP_sf	NA			SRAE_2000129590	26.5574
SSTP_0000071300	PC1	0.021	A0A0K0DTZ7		EF_hand_dom, EF-hand-dom_pair, EF_Hand_1_Ca_BS, EF_hand_pair_protein_CML-like	calcium ion binding	H10E21.4	26.7241	SRAE_1000209300	83.6207	SPAL_0000658800	75.431	SVE_1848400	74.569
SSTP_0000439200	PC1	0.021	A0A0K0E4H2		NA	NA			SRAE_X000215000	66.1667	SPAL_0001440100	50	SVE_0905900	52.1667
SSTP_0001272800	PC1	0.021	A0A0K0ETF3		NA	NA	ZK662.2	40.6114	SRAE_1000172400	86.0262			SVE_0959700	84.7162
SSTP_0000380700	PC1	0.021	A0A0K0E2T8		Sulfotransferase, Chst-1	positive regulation of response to oxidative stress, chondroitin sulfate biosynthetic process, chondroitin 4-sulfotransferase activity, sulfotransferase activity, integral component of membrane, membrane			SRAE_0000008100	65.4839	SPAL_0000411400	55.1613	SVE_1569400	54.1936
SSTP_0001127300	PC1	0.021	A0A0K0EP87		CRISP-related, CAP_domain, CAP_sf	NA			SRAE_2000129590	18.3295
SSTP_0001096600	PC1	0.021	A0A0K0ENC9		NA	NA			SRAE_X000078600	87.1951	SPAL_0000203800	76.8293	SVE_0747300	77.439
SSTP_0000510400	PC1	0.021	A0A0K0E6H4		Col_cuticle_N	structural constituent of cuticle	col-145	67.9054	SRAE_2000126900	91.8919	SPAL_0000563100	93.9189	SVE_1793500	93.2432
SSTP_0000628600	PC1	0.021	A0A0K0E9V4		TSP1_rpt	NA			SRAE_1000068700	81.9095	SPAL_0000479000	69.8492	SVE_0089600	68.3417
SSTP_0000948600	PC1	0.021	A0A0K0EJ35		Fringe-like	transferase activity, transferring glycosyl groups, membrane			SRAE_2000463300	82.4405	SPAL_0000137900	35.4167	SVE_0176800	33.631
SSTP_0000265000	PC1	0.021	A0A0K0DZI8	Metalloendopeptidase	Peptidase_M12A, ShKT_dom, Peptidase_Metallo, MetalloPept_cat_dom_sf, Astacin-like_dom	metalloendopeptidase activity, metallopeptidase activity, proteolysis, zinc ion binding, metal ion binding, hydrolase activity, peptidase activity	nas-15	52.2901	SRAE_X000070400	76.9084	SPAL_0001611300	78.626	SVE_0057400	78.0534
SSTP_0000506000	PC1	0.021	A0A0K0E6C9		Sulfotransferase, Chst-1	positive regulation of response to oxidative stress, chondroitin sulfate biosynthetic process, chondroitin 4-sulfotransferase activity, sulfotransferase activity, integral component of membrane			SRAE_2000507400	52.6829	SPAL_0000593900	44.3902	SVE_0354700	43.9024
SSTP_0001031500	PC1	0.021	A0A0K0ELH1		Collagen	membrane, integral component of membrane			SRAE_1000165300	85.0144	SPAL_0000650900	80.1153	SVE_1058800	79.5389
SSTP_0001234600	PC1	0.021	A0A0K0ESB7		NA	membrane, integral component of membrane					SPAL_0000110600	46.7213	SVE_0137600	45.9016
SSTP_0001067500	PC1	0.021	A0A0K0EMI6		AA_transpt_TM	membrane, integral component of membrane			SRAE_1000127500	77.5391	SPAL_0000831600	74.6094
SSTP_0001247300	PC1	0.021	A0A0K0ESP4		NA	membrane, integral component of membrane			SRAE_X000117600	71.134	SPAL_0000337400	45.0172	SVE_0711900	36.4261
SSTP_0000813000	PC1	0.02	A0A0K0EF67		NA	NA			SRAE_1000039600	69.4215	SPAL_0001335000	57.0248	SVE_0332600	54.5455
SSTP_0000882400	PC1	0.02	A0A0K0EH67		Thioredoxin-like_sf	NA	txdc-12.1	44.7826	SRAE_X000150500	70	SPAL_0001328500	77.8261	SVE_0102000	69.5652
SSTP_0000080600	PC1	0.02	A0A0K0DU92		Glyco_trans_1, Glyco_trans_4-like_N	NA	bus-8	62.5882	SRAE_2000392100	94.1176	SPAL_0000313300	86.3529	SVE_1586900	88.4706
SSTP_0000113100	PC1	0.02	A0A0K0DV63		NA	NA			SRAE_2000367000	87.5427	SPAL_0000467800	83.959	SVE_1759100	69.7952
SSTP_0000421910	PC1	0.02	A0A0K0E402	Metalloendopeptidase	Peptidase_M12A, Peptidase_Metallo, MetalloPept_cat_dom_sf	metalloendopeptidase activity, metallopeptidase activity, proteolysis, zinc ion binding, metal ion binding, hydrolase activity, peptidase activity			SRAE_2000453900	52.0202	SPAL_0000629300	45.9596
SSTP_0000958300	PC1	0.02	A0A0K0EJD7	Dimethylaniline monooxygenase [N-oxide-forming]	Flavin_mOase, Flavin_mOase_5, Flavin_mOase-like, FAD/NAD-bd_sf	N,N-dimethylaniline monooxygenase activity, NADP binding, flavin adenine dinucleotide binding, oxidation-reduction process, oxidoreductase activity, membrane, integral component of membrane, endoplasmic reticulum, endoplasmic reticulum membrane, monooxygenase activity, organelle membrane, intracellular membrane-bounded organelle	fmo-4	58.4192	SRAE_0000002500	89.6907	SPAL_0001751300	85.0515	SVE_1105200	83.8488
SSTP_0000705700	PC1	0.02	A0A0K0EC49		CRISP-related, V5_allergen-like, CAP_domain, Allrgn_V5/Tpx1_CS, SCP_GAPR1-like, CAP_sf	extracellular region	scl-12	14.9466	SRAE_2000455200	44.1281
SSTP_0000859100	PC1	0.02	A0A0K0EGH9		Col_cuticle_N, Collagen	structural constituent of cuticle, membrane, integral component of membrane	col-173	42.5868			SPAL_0001183900	76.6562	SVE_0106900	75.3943
SSTP_0001255200	PC1	0.02	A0A0K0ESX5		NA	NA	C38C6.3	38.9205	SRAE_X000109300	84.375	SPAL_0000689800	79.8295	SVE_0874900	77.5568
SSTP_0000944500	PC1	0.02	A0A0K0EIZ2		Col_cuticle_N, Collagen	structural constituent of cuticle, membrane, integral component of membrane	sqt-3	77.0764	SRAE_1000033500	98.0066	SPAL_0001136500	97.6744	SVE_0773700	96.6777
SSTP_0001083100	PC1	0.02	A0A0K0EMZ3		NA	NA			SRAE_1000058300	77.2109	SPAL_0000807400	67.6871	SVE_1341900	66.6667
SSTP_0000082800	PC1	0.02	A0A0K0DUB5		NA	membrane, integral component of membrane			SRAE_2000394300	86.4407	SPAL_0000396200	67.7966	SVE_0281600	66.1017
SSTP_0001094900	PC1	0.02	A0A0K0ENB2		Ground-like_dom	NA	grl-4	49.1936	SRAE_X000080200	89.5161	SPAL_0000053700	86.2903	SVE_0749100	85.8871
SSTP_0001052000	PC1	0.02	A0A0K0EM32		ShKT_dom, Neur_channel, Neur_chan_lig-bd, Neur_chan_lig-bd_sf	extracellular ligand-gated ion channel activity, ion transmembrane transport, ion transport, ion channel activity, transmembrane signaling receptor activity, integral component of membrane, membrane	lgc-22	50.8046	SRAE_X000060800	89.1954	SPAL_0001366500	85.5172	SVE_1974000	82.069
SSTP_0000438300	PC1	0.02	A0A0K0E4G4		DB	NA			SRAE_X000214100	87.037	SPAL_0001446000	82.4074	SVE_0142900	78.7037
SSTP_0000865500	PC1	0.02	A0A0K0EGP4		FAD/NAD-bd_sf	NA			SRAE_X000144300	88.6525	SPAL_0000385400	90.0709	SVE_1905100	86.5248
SSTP_0001103800	PC1	0.02	A0A0K0ENK1		NA	NA
SSTP_0001123600	PC1	0.02	A0A0K0EP49		Thioredoxin-like_sf	NA	txdc-12.2	35.2071	SRAE_X000258800	60.9467	SPAL_0001567800	49.4083	SVE_0599800	60.355
SSTP_0000742100	PC1	0.02	A0A0K0ED58		NA	NA			SRAE_2000386100	61.976	SPAL_0000423400	52.5449	SVE_1642000	56.4371
SSTP_0000859300	PC1	0.02	A0A0K0EGI1		NA	NA
SSTP_0000508500	PC1	0.02	A0A0K0E6F4		Transposase_1, Homeobox-like_sf, WH-like_DNA-bd_sf, Mos1_HTH	DNA binding			SRAE_X000208700	1.46341			SVE_1771300	58.5366
SSTP_0000367400	PC1	0.02	A0A0K0E2F4		NA	membrane, integral component of membrane			SRAE_2000452900	29.7101
SSTP_0000324800	PC1	0.02	A0A0K0E184		NA	NA	sups-1	28.3142	SRAE_2000307500	78.5597	SPAL_0000300800	77.2504	SVE_1599500	76.1047
SSTP_0000490600	PC1	0.02	A0A0K0E5X1		SDR_fam, NAD(P)-bd_dom_sf	NA			SRAE_X000049200	69.9704	SPAL_0000055300	58.5799	SVE_1970600	57.6923
SSTP_0000148700	PC1	0.02	A0A0K0DW71		Col_cuticle_N, Collagen	structural constituent of cuticle, membrane, integral component of membrane	col-43	45.0847	SRAE_2000159000	92.2034	SPAL_0000242900	89.4915	SVE_0483800	90.5085
SSTP_0000954500	PC1	0.02	A0A0K0EJ96		Pan_app	membrane, integral component of membrane			SRAE_2000508900	63.8591
SSTP_0000282000	PC1	0.02	A0A0K0E003		ShKT_dom	NA			SRAE_1000238800	58.5526	SPAL_0000247200	44.0789	SVE_0036600	46.0526
SSTP_0000450400	PC1	0.02	A0A0K0E4T4		ShKT_dom	membrane, integral component of membrane			SRAE_X000075700	73.774	SPAL_0000197600	64.8188	SVE_0043500	64.1791
SSTP_0000148000	PC1	0.02	A0A0K0DW64		T19C3.2-like	NA	Y54F10AM.6	54.6939	SRAE_2000159700	83.6735	SPAL_0000839600	83.2653	SVE_1796800	84.0816
SSTP_0000354200	PC1	0.019	A0A0K0E222		Sulfatase_N, Fringe-like, Alkaline_phosphatase_core_sf	sulfuric ester hydrolase activity, transferase activity, transferring glycosyl groups, catalytic activity, membrane	sul-3	32.5549	SRAE_2000430700	51.0989	SPAL_0000507600	49.4506	SVE_0379600	49.4506
SSTP_0000730600	PC1	0.019	A0A0K0ECU1		NA	NA			SRAE_0000014000	67.8344	SPAL_0000360900	45.8599	SVE_0752100	52.2293
SSTP_0001241100	PC1	0.019	A0A0K0ESI2		Znf_C2H2_type, Znf_C2H2_sf	nucleic acid binding			SRAE_X000124100	87.581
SSTP_0000060400	PC1	0.019	A0A0K0DTP1		bHLH_dom, HLH_DNA-bd_sf	protein dimerization activity	hlh-13	51.4085	SRAE_X000202300	94.3662	SPAL_0001306600	71.831	SVE_0357400	85.2113
SSTP_0000772500	PC1	0.019	A0A0K0EE11		Col_cuticle_N, Collagen	structural constituent of cuticle, membrane, integral component of membrane	col-170	48.1481	SRAE_2000104500	82.0988	SPAL_0000999400	81.7901	SVE_1856000	83.3333
SSTP_0000035100	PC1	0.019	A0A0K0DSY9		NA	NA			SRAE_X000136800	69.4184	SPAL_0001452100	53.8462	SVE_0904900	52.1576
SSTP_0000806500	PC1	0.019	A0A0K0EF01		Lipid-bd_serum_glycop_C, Lipid-bd_serum_glycop_N, Bactericidal_perm-incr_a/b_dom, BPI/LBP/Plunc	lipid binding	F10D11.6	41.7067	SRAE_2000132100	88.3413	SPAL_0000811700	82.8125	SVE_1879800	82.8125
SSTP_0001168500	PC1	0.019	A0A0K0EQF6		AB_hydrolase_lipase, AB_hydrolase	lipid metabolic process	lipl-4	30.0725	SRAE_1000020700	88.2246	SPAL_0000209100	30.6159	SVE_0086600	78.9855
SSTP_0000445600	PC1	0.019	A0A0K0E4N7		Paired_dom, Homeobox-like_sf, WH-like_DNA-bd_sf	regulation of transcription, DNA-templated, DNA binding, nucleus, multicellular organism development	npax-3	30.8943	SRAE_X000057000	85.7724	SPAL_0000201900	77.2358	SVE_0038800	75.6098
SSTP_0000735200	PC1	0.019	A0A0K0ECY7		SLC26A/SulP_fam, Kunitz_BPTI, STAS_dom, Cys_repeat_1, SLC26A/SulP_dom, S04_transporter_CS, Lustrin_cystein, STAS_dom_sf, Kunitz_BPTI_sf	secondary active sulfate transmembrane transporter activity, sulfate transport, sulfate transmembrane transporter activity, serine-type endopeptidase inhibitor activity, transmembrane transport, integral component of membrane, membrane, negative regulation of endopeptidase activity, sulfate transmembrane transport	sulp-2	10.6602	SRAE_0000018800	82.9545	SPAL_0000727600	6.60173	SVE_0240100	11.3636
SSTP_0000120600	PC1	0.019	A0A0K0DVE0		A-crystallin/Hsp20_dom, HSP20-like_chaperone	NA			SRAE_2000181500	86.7924	SPAL_0001023000	90.566	SVE_0501700	88.6792
SSTP_0000862600	PC1	0.019	A0A0K0EGL5		MAM_dom, ConA-like_dom_sf	membrane, integral component of membrane	mam-2	39.599	SRAE_X000148200	87.3434	SPAL_0000618500	81.0777	SVE_0099600	81.3283
SSTP_0001027300	PC1	0.019	A0A0K0ELD0		CC_domain	NA							SVE_1242900	50
SSTP_0001255100	PC1	0.019	A0A0K0ESX4		NA	membrane, integral component of membrane			SRAE_X000109400	88.5246	SPAL_0000689900	75.6831	SVE_0874800	74.0437
SSTP_0001021300	PC1	0.019	A0A0K0EL69		NA	NA	dos-2	41.0423	SRAE_X000245500	85.0163	SPAL_0001167200	81.1075	SVE_0297800	84.0391
SSTP_0000860500	PC1	0.019	A0A0K0EGJ3		NA	NA			SRAE_X000039500	66.8325	SPAL_0000534100	43.1177	SVE_0105600	50.2488
SSTP_0001127400	PC1	0.019	A0A0K0EP88		CAP_domain, CAP_sf	NA			SRAE_2000129590	12.5592
SSTP_0000630600	PC1	0.019	A0A0K0E9X4		NA	NA			SRAE_X000216100	81.2721	SPAL_0001263900	67.8445	SVE_0117300	62.8975
SSTP_0000811600	PC1	0.019	A0A0K0EF53		NA	NA
SSTP_0000871800	PC1	0.019	A0A0K0EGV8		GM2-AP, GM2-AP_sf	ganglioside catabolic process, enzyme activator activity, positive regulation of catalytic activity	mlt-8	71.4789	SRAE_X000009800	98.9437	SPAL_0000527200	97.5352	SVE_0623100	97.1831
SSTP_0000217700	PC1	0.019	A0A0K0DY62		Nucl_hrmn_rcpt_lig-bd, Znf_hrmn_rcpt, Znf_NHR/GATA, NHR-like_dom_sf	sequence-specific DNA binding, DNA-binding transcription factor activity, regulation of transcription, DNA-templated, nucleus, zinc ion binding, metal ion binding, DNA binding			SRAE_2000489100	92.0661	SPAL_0001157400	87.7686	SVE_1633700	88.0992
SSTP_0001103200	PC1	0.019	A0A0K0ENJ5		NA	NA
SSTP_0000616000	PC1	0.019	A0A0K0E9H7		NA	membrane, integral component of membrane			SRAE_X000054800	63.806	SPAL_0001487600	54.1045	SVE_0745900	51.1194
SSTP_0001183800	PC1	0.019	A0A0K0EQV7		NA	NA	R02F11.1	47.7387	SRAE_1000258200	93.9698	SPAL_0000173700	89.4472	SVE_1678100	88.4422
SSTP_0000129800	PC1	0.019	A0A0K0DVN2		NA	NA			SRAE_2000338500	80.814	SPAL_0000223400	72.6744	SVE_1740800	73.2558
SSTP_0001172700	PC1	0.019	A0A0K0EQJ8		NA	NA			SRAE_0000032500	63.2593	SPAL_0001591800	57.037	SVE_0997000	56.1481
SSTP_0001245600	PC1	0.019	A0A0K0ESM6		NA	membrane, integral component of membrane			SRAE_X000119300	73.2852	SPAL_0001272900	55.9567	SVE_0304600	55.9567
SSTP_0001130900	PC1	0.019	A0A0K0EPC5	Metalloendopeptidase	Peptidase_M12A, ShKT_dom, Peptidase_Metallo, MetalloPept_cat_dom_sf, Astacin-like_dom	metalloendopeptidase activity, metallopeptidase activity, proteolysis, zinc ion binding, metal ion binding, hydrolase activity, peptidase activity	nas-6	59.4156	SRAE_X000191500	89.9351	SPAL_0000023600	84.4156	SVE_0302900	82.7922
SSTP_0001170800	PC1	0.019	A0A0K0EQH8		Nucl_hrmn_rcpt_lig-bd, Znf_hrmn_rcpt, Nuclear_hrmn_rcpt, Znf_NHR/GATA, NHR-like_dom_sf	steroid hormone receptor activity, sequence-specific DNA binding, DNA-binding transcription factor activity, regulation of transcription, DNA-templated, DNA binding, nucleus, zinc ion binding, metal ion binding, steroid hormone mediated signaling pathway	nhr-91	26.601	SRAE_0000030600	58.867	SPAL_0001238300	55.665	SVE_0697800	61.4532
SSTP_0001091700	PC1	0.019	A0A0K0EN80		DB	NA	pqn-32	30.4991	SRAE_X000031200	55.8226	SPAL_0001608800	46.3956	SVE_1982700	62.1072
SSTP_0000958700	PC1	0.018	A0A0K0EJE1		Col_cuticle_N, Collagen	structural constituent of cuticle, membrane, integral component of membrane			SRAE_0000002900	96	SPAL_0001751700	91.3333
SSTP_0000437400	PC1	0.018	A0A0K0E4F4		NA	NA			SRAE_X000177000	80.4636	SPAL_0000390500	67.5497	SVE_0659000	66.2252
SSTP_0000109900	PC1	0.018	A0A0K0DV32		NA	membrane, integral component of membrane			SRAE_2000408200	85.7143	SPAL_0001316100	75.5102	SVE_0676000	73.0612
SSTP_0000348700	PC1	0.018	A0A0K0E1W9		Hedgehog_Hint, Hint_dom_C, Hint_dom_N, Intein_N, Hint_dom_sf	intein-mediated protein splicing, peptidase activity, proteolysis, membrane, integral component of membrane	wrt-6	28.021	SRAE_X000100500	71.6287	SPAL_0001461400	33.6252
SSTP_0000258700	PC1	0.018	A0A0K0DZC2		Col_cuticle_N, Collagen	structural constituent of cuticle, membrane, integral component of membrane	col-34	78.8779	SRAE_2000439500	95.0495
SSTP_0000091700	PC1	0.018	A0A0K0DUK3		NA	NA			SRAE_2000403200	60.8997	SPAL_0000498700	54.6713	SVE_0701900	51.9031
SSTP_0000128200	PC1	0.018	A0A0K0DVL6		TSP1_rpt, Peptidase_M12B, Peptidase_M12B_N, MetalloPept_cat_dom_sf, TSP1_rpt_sf, ADAM_CR_2	metalloendopeptidase activity, metallopeptidase activity, proteolysis	adt-1	46.4018	SRAE_2000337000	89.2054	SPAL_0000221700	85.1574	SVE_1739100	80.5097
SSTP_0000735000	PC1	0.018	A0A0K0ECY5		NA	NA			SRAE_0000018500	84.0909	SPAL_0000501850	62.5	SVE_0239800	62.5
SSTP_0001119100	PC1	0.018	A0A0K0EP04		Leu-rich_rpt, Leu-rich_rpt_typical-subtyp, LRR_dom_sf	protein binding, membrane, integral component of membrane	let-4	33.4123	SRAE_X000251600	79.9763	SPAL_0000013200	72.3934	SVE_0617400	73.1043
SSTP_0000384100	PC1	0.018	A0A0K0E2X2		NA	NA			SRAE_2000455800	76.2887	SPAL_0000599900	68.0412	SVE_1710900	71.134
SSTP_0001222700	PC1	0.018	A0A0K0ERZ8		EGF-like_dom, EGF-like_CS	NA	Y38C1AA.9	29.6552	SRAE_X000020300	90.3448	SPAL_0000072200	87.5862	SVE_0911500	86.8966
SSTP_0000726600	PC1	0.018	A0A0K0ECQ1	Metalloendopeptidase	Peptidase_M12A, ShKT_dom, Peptidase_Metallo, MetalloPept_cat_dom_sf, Astacin-like_dom	metalloendopeptidase activity, metallopeptidase activity, proteolysis, zinc ion binding, metal ion binding, hydrolase activity, membrane, integral component of membrane, peptidase activity	nas-7	50.3448	SRAE_2000102700	85.0575	SPAL_0000476600	79.7701	SVE_0454200	80.2299
SSTP_0001043400	PC1	0.018	A0A0K0ELU6		Ground-like_dom	NA			SRAE_1000059600	32.5984	SPAL_0000362300	25.6693	SVE_0210500	29.9213
SSTP_0000956100	PC1	0.018	A0A0K0EJB5		DUF1647	NA			SRAE_2000473700	79.5699	SPAL_0000593700	83.6021	SVE_0354900	82.2581
SSTP_0001122700	PC1	0.018	A0A0K0EP40		SaposinB_dom, Saposin-like	NA					SPAL_0001669000	82.8829	SVE_0621100	80.1802
SSTP_0000606100	PC1	0.018	A0A0K0E977		Col_cuticle_N, Collagen	structural constituent of cuticle, membrane, integral component of membrane	col-174	57.2368	SRAE_1000268100	96.3816	SPAL_0000286500	59.2105	SVE_0209400	90.1316
SSTP_0001174300	PC1	0.018	A0A0K0EQL3		Znf_C2H2_type	nucleic acid binding	egl-46	30.3571	SRAE_0000033900	94.6429	SPAL_0001593300	74.4048	SVE_0998500	91.9643
SSTP_0001229100	PC1	0.018	A0A0K0ES63		Calycin	NA	lpr-5	47.9927	SRAE_X000229500	86.1314	SPAL_0000845800	85.219	SVE_0109900	83.7591
SSTP_0000537700	PC1	0.018	A0A0K0E7A1		Glyco_transf_92	NA			SRAE_2000459800	64.1189	SPAL_0001300900	56.4756	SVE_0343500	57.1125
SSTP_0000433300	PC1	0.018	A0A0K0E4B4		ZP_dom, Pan_app	NA	let-653	36.3734	SRAE_X000172900	80.794	SPAL_0001690100	74.8927	SVE_0662000	75.6438
SSTP_0000850800	PC1	0.018	A0A0K0EG98		PAS, PAS-like_dom_sf	NA			SRAE_X000207100	87.0403	SPAL_0000944600	69.352
SSTP_0000915500	PC1	0.018	A0A0K0EI48		Leu-rich_rpt, Leu-rich_rpt_typical-subtyp, LRR_dom_sf	protein binding, membrane, integral component of membrane			SRAE_1000141200	80.6488	SPAL_0000755300	75.5034	SVE_0970700	75.3915
SSTP_0000741000	PC1	0.018	A0A0K0ED47		NA	membrane, integral component of membrane			SRAE_2000387200	82.2917	SPAL_0000006300	74.4792	SVE_0670600	72.9167
SSTP_0000598000	PC1	0.018	A0A0K0E8Z7		NA	NA			SRAE_1000265100	76.1468	SPAL_0000266100	72.4771	SVE_1900500	70.6422
SSTP_0001063800	PC1	0.018	A0A0K0EMF0		NA	NA	abu-13	22.549			SPAL_0000732000	65.4412	SVE_1033000	57.598
SSTP_0001261300	PC1	0.018	A0A0K0ET37		Znf_C2H2_type, Znf_C2H2_sf	nucleic acid binding	F56D1.1	12.4183	SRAE_1000018700	87.5817	SPAL_0001526400	79.4118	SVE_0008600	79.4118
SSTP_0000228500	PC1	0.018	A0A0K0DYG9		Kunitz_BPTI, Cys_repeat_1, Prtase_inh_Kunz-CS, Lustrin_cystein, Kunitz_BPTI_sf	serine-type endopeptidase inhibitor activity, negative regulation of endopeptidase activity	Y43F8B.3	47.2823	SRAE_2000356900	88.2777	SPAL_0001054400	84.6103	SVE_1770000	84.8723
SSTP_0001057300	PC1	0.018	A0A0K0EM85		NA	NA					SPAL_0001464600	46.9697	SVE_0631100	48.4848
SSTP_0000183400	PC1	0.018	A0A0K0DX67		DB	NA	Y65B4BM.3	50.4918	SRAE_2000010300	93.1148	SPAL_0001638200	91.1475	SVE_0428500	90.8197
SSTP_0000900300	PC1	0.018	A0A0K0EHP9		SOD_Cu_Zn_dom, SOD_Cu/Zn_/chaperone, SOD-like_Cu/Zn_dom_sf	superoxide metabolic process, metal ion binding			SRAE_1000282400	91.7526	SPAL_0000353000	79.8969
SSTP_0000085100	PC1	0.018	A0A0K0DUD8		Warthog_3	multicellular organism development	wrt-9	30.7036	SRAE_2000396600	83.5821	SPAL_0000434100	50.7463	SVE_0284900	77.3987
SSTP_0000553100	PC1	0.018	A0A0K0E7Q6		GABAA/Glycine_rcpt, Neurotrans-gated_channel_TM, Neur_channel, Neur_chan_lig-bd, Neurotransmitter_ion_chnl_CS, Neuro-gated_channel_TM_sf, Neur_chan_lig-bd_sf	extracellular ligand-gated ion channel activity, ion transmembrane transport, ion transport, ion channel activity, transmembrane signaling receptor activity, integral component of membrane, membrane, plasma membrane	lgc-37	53.4836	SRAE_1000338100	91.3934	SPAL_0001562400	88.5246	SVE_0861300	88.9344
SSTP_0001231200	PC1	0.018	A0A0K0ES84		P_Acid_Pase_2/haloperoxidase, P_Acid_Pase_2/haloperoxi_sf	membrane, integral component of membrane	plpr-1	69.1748	SRAE_X000134800	97.8155	SPAL_0001453900	93.2039	SVE_0903100	93.6893
SSTP_0000364200	PC1	0.018	A0A0K0E2C0		NA	membrane, integral component of membrane			SRAE_2000498100	76.3359			SVE_0593000	61.8321
SSTP_0000355800	PC1	0.018	A0A0K0E237		NA	NA
SSTP_0000633800	PC1	0.018	A0A0K0EA06		Peptidase_M14, M14A_act_pep, IGCP-like_CPD, M14A-like_propep	carboxypeptidase activity, proteolysis, zinc ion binding, metallocarboxypeptidase activity, membrane, integral component of membrane	T06A4.1	31.9681	SRAE_1000317100	73.0375	SPAL_0000277400	64.1638	SVE_0399700	63.7088
SSTP_0000883600	PC1	0.018	A0A0K0EH78		SDR_fam, Sc_DH/Rdtase_CS, NAD(P)-bd_dom_sf	oxidoreductase activity, membrane, integral component of membrane, oxidation-reduction process	dhs-5	54.8485	SRAE_X000149100	84.8485	SPAL_0001329800	76.0606	SVE_0100600	73.0303
SSTP_0001153900	PC1	0.018	A0A0K0EQ10		Pan_app	NA	H03E18.1	23.0769	SRAE_1000011900	75.7085	SPAL_0000067700	70.1417	SVE_0233300	73.3806
SSTP_0000936000	PC1	0.018	A0A0K0EIQ4		Kunitz_BPTI, Cys_repeat_1, Prtase_inh_Kunz-CS, Lustrin_cystein, Chitin-bd_dom_sf, Kunitz_BPTI_sf	chitin metabolic process, chitin binding, serine-type endopeptidase inhibitor activity, negative regulation of endopeptidase activity							SVE_0584300	8.16853
SSTP_0000323500	PC1	0.018	A0A0K0E171		Col_cuticle_N, Collagen	structural constituent of cuticle, membrane, integral component of membrane			SRAE_2000320300	83.6066
SSTP_0001129000	PC1	0.018	A0A0K0EPA3		DUF148	NA			SRAE_1000276100	68.0851	SPAL_0000096400	36.5957
SSTP_0000482000	PC1	0.018	A0A0K0E5N2		CRISP-related, V5_allergen-like, CAP_domain, Allrgn_V5/Tpx1_CS, SCP_GAPR1-like, CAP_sf	extracellular region	F09B9.5	26.5537
SSTP_0001165700	PC1	0.018	A0A0K0EQC8		Transthyretin-like, Transthyretin-like_sf	extracellular space			SRAE_1000055200	81.0606	SPAL_0001496200	73.4848	SVE_0080100	71.9697
SSTP_0000853600	PC1	0.018	A0A0K0EGC6		NA	NA	Y53F4B.27	23.6133	SRAE_X000203300	76.7036	SPAL_0001307600	59.7464	SVE_0358400	61.4897
SSTP_0001091000	PC1	0.018	A0A0K0EN73		bZIP	DNA-binding transcription factor activity, regulation of transcription, DNA-templated			SRAE_X000031900	89.1892	SPAL_0001609400	77.7027	SVE_1982000	79.2793
SSTP_0000608600	PC1	0.018	A0A0K0E9A2		NA	NA
SSTP_0000456500	PC1	0.018	A0A0K0E4Z7		NA	NA			SRAE_X000140300	41.0072
SSTP_0000274900	PC1	0.018	A0A0K0DZT8		ShKT_dom	NA			SRAE_2000514800	62.8205	SPAL_0000982000	61.5385	SVE_1573500	59.4017
SSTP_0000080650	PC1	0.018	A0A0K0DU93		NA	membrane, integral component of membrane							SVE_1000586950	62.1359
SSTP_0000251500	PC1	0.018	A0A0K0DZ51		Peptidase_M14, M14A_act_pep, ShKT_dom, IGCP-like_CPD, M14A-like_propep	carboxypeptidase activity, proteolysis, zinc ion binding, metallocarboxypeptidase activity	suro-1	37.6871	SRAE_2000087600	83.2653	SPAL_0000777900	80.5442	SVE_0422400	73.4694
SSTP_0000420500	PC1	0.018	A0A0K0E3Y5		Cyt_P450, Cyt_P450_E_grp-I, Cyt_P450_CS, Cyt_P450_sf	oxidoreductase activity, acting on paired donors, with incorporation or reduction of molecular oxygen, iron ion binding, heme binding, oxidation-reduction process, metal ion binding, oxidoreductase activity, membrane, integral component of membrane, monooxygenase activity	cyp-42A1	59.3385	SRAE_2000441700	92.4125	SPAL_0000319400	89.6887	SVE_1580800	90.2724
SSTP_0000903800	PC1	0.017	A0A0K0EHT3		NA	NA			SRAE_1000181300	90.7143
SSTP_0000661200	PC1	0.017	A0A0K0EAT7		PEBP-like_sf	NA					SPAL_0000258400	70.7182
SSTP_0001063900	PC1	0.017	A0A0K0EMF1		NA	NA			SRAE_1000090200	79.0476	SPAL_0000732100	84.7619	SVE_1032900	69.5238
SSTP_0001241200	PC1	0.017	A0A0K0ESI3		NA	NA			SRAE_X000124000	74.7368	SPAL_0001279800	68.4211
SSTP_0001246100	PC1	0.017	A0A0K0ESN1		NA	NA							SVE_0305100	47.2222
SSTP_0001135100	PC1	0.017	A0A0K0EPG7		Col_cuticle_N, Collagen	structural constituent of cuticle, membrane, integral component of membrane	col-164	38.5802	SRAE_1000202300	82.716	SPAL_0001583300	79.321
SSTP_0000790400	PC1	0.017	A0A0K0EEJ2		Alpha-crystallin/HSP, A-crystallin/Hsp20_dom, HSP20-like_chaperone	NA	hsp-12.1	57.1429	SRAE_2000033400	84.8214	SPAL_0001421600	81.25	SVE_0536600	82.1429
SSTP_0000183300	PC1	0.017	A0A0K0DX66		NA	NA					SPAL_0001638300	97.6744	SVE_0428400	94.186
SSTP_0001075700	PC1	0.017	A0A0K0EMR5	Alkaline ceramidase	ACER	ceramide metabolic process, hydrolase activity, acting on carbon-nitrogen (but not peptide) bonds, in linear amides, integral component of membrane, hydrolase activity, membrane, lipid metabolic process	W02F12.2	58.7361	SRAE_X000211100	88.4758	SPAL_0000765100	83.6431
SSTP_0000422300	PC1	0.017	A0A0K0E406	Zinc metalloproteinase	CUB_dom, Peptidase_M12A, Peptidase_Metallo, Metallopeptidase_nem, MetalloPept_cat_dom_sf, Astacin-like_dom, Sperma_CUB_dom_sf	molting cycle, collagen and cuticulin-based cuticle, metalloendopeptidase activity, metallopeptidase activity, proteolysis, zinc ion binding, metal ion binding, hydrolase activity, peptidase activity, extracellular region					SPAL_0000729850	23.822	SVE_0065400	30.3665
SSTP_0000647600	PC1	0.017	A0A0K0EAF1		DUF1647	NA			SRAE_2000522200	67.3418	SPAL_0000721400	65.0633	SVE_1076800	65.3165
SSTP_0000208300	PC1	0.017	A0A0K0DXW9		NA	NA			SRAE_2000413600	75.2294	SPAL_0001737900	62.844	SVE_1620800	61.9266
SSTP_0000852300	PC1	0.017	A0A0K0EGB3		CRISP-related, CAP_domain, CAP_sf	NA			SRAE_2000129590	32.7138
SSTP_0000030200	PC1	0.017	A0A0K0DST8		Transthyretin-like, Transthyretin-like_sf	extracellular space	ttr-5	61.5385	SRAE_1000333300	74.1259	SPAL_0000716000	79.021	SVE_0160400	79.7203
SSTP_0000553000	PC1	0.017	A0A0K0E7Q5		Globin-like_sf, Globin/Proto	oxygen binding, heme binding	B0361.4	24.6575	SRAE_1000338200	71.2329
SSTP_0000481300	PC1	0.017	A0A0K0E5M6		NA	NA
SSTP_0001008900	PC1	0.017	A0A0K0EKU6		CRISP-related, CAP_domain, Allrgn_V5/Tpx1_CS, SCP_GAPR1-like, CAP_sf	extracellular region	F09B9.5	6.47841	SRAE_0000045600	16.7774			SVE_0646900	12.6246
SSTP_0000973400	PC1	0.017	A0A0K0EJU2		Aquaporin-like	membrane, integral component of membrane	aqp-9	30.5699	SRAE_2000266200	66.8394	SPAL_0000120100	54.1451	SVE_0461900	57.772
SSTP_0001123700	PC1	0.017	A0A0K0EP50		Kinase-like_dom_sf, Dhs-27, CHK_kinase-like	NA	C50F4.1	8.72641	SRAE_X000258700	67.9245	SPAL_0001567700	64.1509	SVE_0599900	64.3868
SSTP_0000372200	PC1	0.017	A0A0K0E2K4		Interferon-induced_GILT	NA	R07E5.4	65.1042	SRAE_2000188900	76.5625	SPAL_0001030700	94.2708	SVE_0493900	94.7917
SSTP_0000608800	PC1	0.017	A0A0K0E9A4		NA	membrane, integral component of membrane			SRAE_1000344800	65.8537	SPAL_0001641500	60.2439	SVE_0644700	59.7561
SSTP_0000659100	PC1	0.017	A0A0K0EAR7		NA	membrane, integral component of membrane			SRAE_X000092400	91.5916	SPAL_0001610600	84.0841	SVE_0058100	82.8829
SSTP_0001251700	PC1	0.017	A0A0K0EST8		DM13_domain	NA	W01C8.5	38.8368	SRAE_X000112800	90.2439	SPAL_0001283400	84.9906
SSTP_0000110100	PC1	0.017	A0A0K0DV34		NA	NA
SSTP_0001147300	PC1	0.017	A0A0K0EPU1		Mig-18-like	membrane, integral component of membrane			SRAE_1000093000	83.3795	SPAL_0001354400	73.6842	SVE_1089000	73.1302
SSTP_0000832300	PC1	0.017	A0A0K0EFR3		Cadherin-like_dom, Cadherin-like_sf, Cadherin_CS	plasma membrane, cell adhesion, homophilic cell adhesion via plasma membrane adhesion molecules, calcium ion binding, membrane, integral component of membrane	cdh-5	39.2466	SRAE_X000194100	83.4931	SPAL_0001435800	76.9178	SVE_0302000	76.1644
SSTP_0000472000	PC1	0.017	A0A0K0E5D4		IPT_dom, Transcription_factor_COE, Ig-like_fold, Ig_E-set, Transcription_factor_COE_CS, COE_DBD, COE_HLH, HLH_DNA-bd_sf, COE_DBD_sf	protein dimerization activity, regulation of transcription, DNA-templated, DNA binding, metal ion binding, nucleus, multicellular organism development	unc-3	58.5263	SRAE_X000003600	93.4737	SPAL_0001132500	93.2632	SVE_0119400	97.0526
SSTP_0000645800	PC1	0.017	A0A0K0EAD3		Col_cuticle_N	structural constituent of cuticle, membrane, integral component of membrane	dpy-3	65.8228	SRAE_2000520400	94.3038	SPAL_0000595800	92.4051	SVE_0352600	92.4051
SSTP_0001042400	PC1	0.017	A0A0K0ELT5		UDP_glucos_trans, UDP_glycos_trans_CS	transferase activity, transferring hexosyl groups, transferase activity, membrane, integral component of membrane, transferase activity, transferring glycosyl groups			SRAE_2000462400	76.9797	SPAL_0001740400	71.8232	SVE_1618000	71.0866
SSTP_0000048400	PC1	0.017	A0A0K0DTC1		NA	NA	D2024.4	39.7213	SRAE_2000327800	88.5017	SPAL_0000212900	81.5331	SVE_1729700	81.5331
SSTP_0000100100	PC1	0.017	A0A0K0DUT4		Sushi_SCR_CCP_dom, Sushi/SCR/CCP_sf	NA					SPAL_0000184100	21.2022	SVE_1225700	10.2732
SSTP_0001055200	PC1	0.017	A0A0K0EM64		NA	membrane, integral component of membrane			SRAE_X000181700	74.0864	SPAL_0001462500	60.7973	SVE_0628400	60.1329
SSTP_0001238400	PC1	0.017	A0A0K0ESF5		NA	NA			SRAE_X000127300	78.1022	SPAL_0000107900	66.4234	SVE_0134500	64.2336
SSTP_0000731700	PC1	0.017	A0A0K0ECV1		NA	NA					SPAL_0001233300	65
SSTP_0000348800	PC1	0.017	A0A0K0E1X0		NA	NA			SRAE_X000100400	80.8511	SPAL_0001165100	76.0638
SSTP_0000612100	PC1	0.017	A0A0K0E9D8		SDR_fam, Sc_DH/Rdtase_CS, NAD(P)-bd_dom_sf	oxidoreductase activity, oxidation-reduction process			SRAE_1000066700	81.2121	SPAL_0000762600	73.0303	SVE_0682800	76.9697
SSTP_0001167900	PC1	0.017	A0A0K0EQF0		NA	membrane, integral component of membrane			SRAE_1000020100	68.2768			SVE_0680100	59.2689
SSTP_0000392300	PC1	0.017	A0A0K0E352		NA	NA							SVE_1854700	81.7204
SSTP_0001091600	PC1	0.017	A0A0K0EN79		Ig_sub2, Ig_sub, Ig-like_dom, Ig_I-set, Ig-like_fold, Ser/Thr_kin_striated-sp, Ig-like_dom_sf	protein serine/threonine kinase activity, protein phosphorylation, ATP binding			SRAE_X000031300	83.4225	SPAL_0001608900	76.4706	SVE_1982600	75.9358
SSTP_0000359500	PC1	0.017	A0A0K0E273		NA	NA					SPAL_0001623900	77.907	SVE_0442900	77.907
SSTP_0000850300	PC1	0.017	A0A0K0EG93		NA	membrane, integral component of membrane	H12D21.9	40.1993	SRAE_X000206600	94.6844	SPAL_0000944100	89.0365	SVE_1679900	88.7043
SSTP_0000615900	PC1	0.017	A0A0K0E9H6		AMP-dep_Synth/Lig, AMP-binding_CS, AMP-bd_C, AMP-dep_Synthh-like_sf	catalytic activity, membrane, integral component of membrane	acs-20	55.287	SRAE_X000054900	89.7281	SPAL_0001487700	83.2326	SVE_0745800	82.9305
SSTP_0000415500	PC1	0.017	A0A0K0E3T5		NA	NA	B0403.5	18.6757	SRAE_2000369400	70.9677	SPAL_0000465100	69.4397
SSTP_0000645200	PC1	0.017	A0A0K0EAC7		Dermatopontin_fam	NA			SRAE_2000473000	83.2589	SPAL_0000595100	79.0179	SVE_0353300	79.4643
SSTP_0000853200	PC1	0.017	A0A0K0EGC2		HTH_Psq, Homeobox-like_sf	DNA binding, nucleus	mbr-1	17.3454	SRAE_X000203700	69.5324	SPAL_0001308000	30.7692	SVE_0358800	39.3665
SSTP_0001055400	PC1	0.017	A0A0K0EM66		Sulfotransferase_dom, P-loop_NTPase, NST/OST	sulfotransferase activity	hst-3.2	49.4949	SRAE_X000181900	90.9091	SPAL_0001462700	78.1145	SVE_0628600	78.1145
SSTP_0000286700	PC1	0.017	A0A0K0E051		Fringe-like, C1GALT1	O-glycan processing, glycoprotein-N-acetylgalactosamine 3-beta-galactosyltransferase activity, transferase activity, transferring glycosyl groups, membrane, integral component of membrane	F56H6.1	16.5198
SSTP_0000773000	PC1	0.017	A0A0K0EE17		Fatty_acid_hydroxylase	iron ion binding, lipid biosynthetic process, oxidation-reduction process, oxidoreductase activity, membrane, integral component of membrane	agmo-1	55.9931	SRAE_2000103900	81.8493	SPAL_0000719000	79.4521	SVE_0484400	77.0548
SSTP_0000223500	PC1	0.017	A0A0K0DYC1		Lipase_EstA/Esterase_EstB, AB_hydrolase	hydrolase activity, membrane, integral component of membrane			SRAE_2000351200	78.7671	SPAL_0001049300	78.0822	SVE_1775200	76.0274
SSTP_0001125300	PC1	0.017	A0A0K0EP66		Calycin, DUF1794	NA	C52G5.2	67.1875	SRAE_X000197000	81.7708	SPAL_0001291300	83.3333	SVE_0840600	82.8125
SSTP_0000085600	PC1	0.017	A0A0K0DUE3		Homeobox_dom, Znf_LIM, Homeobox-like_sf, Homeobox_CS	sequence-specific DNA binding, regulation of transcription, DNA-templated, DNA binding, metal ion binding, nucleus	mec-3	25.3247
SSTP_0000877500	PC1	0.017	A0A0K0EH18		Col_cuticle_N, Collagen	structural constituent of cuticle, membrane, integral component of membrane	col-2	64.1936	SRAE_X000155600	92.5806	SPAL_0000382800	81.6129	SVE_0782400	80.3226
SSTP_0000048500	PC1	0.017	A0A0K0DTC2		bHLH_dom, Neurogenic_DUF, Neurod1, HLH_DNA-bd_sf	neuron development, protein dimerization activity, regulation of transcription, DNA-templated	cnd-1	30.4147	SRAE_2000327700	92.1659	SPAL_0000212800	80.1843	SVE_1729600	82.4885
SSTP_0000764700	PC1	0.017	A0A0K0EDT5		NA	NA			SRAE_2000280600	82.0225	SPAL_0001406100	74.9064	SVE_1721600	77.9026
SSTP_0000549700	PC1	0.017	A0A0K0E7M2		EGF-like_dom, EGF-like_CS	NA					SPAL_0001275900	66.8874	SVE_0829400	67.8808
SSTP_0000686600	PC1	0.016	A0A0K0EBJ4		NA	membrane, integral component of membrane	F09F9.2	26.2673	SRAE_2000513900	78.341	SPAL_0000982800	75.1152	SVE_1572700	65.8986
SSTP_0000072600	PC1	0.016	A0A0K0DU10		Hedgehog_Hint, Hint_dom_C, Hint_dom_N, Intein_N, Hint_dom_sf	intein-mediated protein splicing, peptidase activity, proteolysis			SRAE_1000169100	78.0969	SPAL_0000635400	75.2244	SVE_0017500	73.7882
SSTP_0000835700	PC1	0.016	A0A0K0EFV0		DH-domain, PH_domain, PH-like_dom_sf, DBL_dom_sf	regulation of Rho protein signal transduction, Rho guanyl-nucleotide exchange factor activity	prhg-1	59.6748	SRAE_1000323600	92.0325	SPAL_0001502100	86.6667	SVE_1662400	85.0406
SSTP_0000608700	PC1	0.016	A0A0K0E9A3		NA	NA			SRAE_1000344700	68.984
SSTP_0001263800	PC1	0.016	A0A0K0ET61		NA	membrane, integral component of membrane	Y32G9B.1	23.0769	SRAE_1000054700	77.3279	SPAL_0001191700	75.9109	SVE_0074500	70.0405
SSTP_0000829400	PC1	0.016	A0A0K0EFN3		NA	NA
SSTP_0001114600	PC1	0.016	A0A0K0ENV8		Col_cuticle_N, Collagen	structural constituent of cuticle, membrane, integral component of membrane	col-34	77.2277	SRAE_2000439500	92.0792
SSTP_0000697500	PC1	0.016	A0A0K0EBV5		C2_dom, Synaptotagmin, C2_domain_sf	membrane	snt-3	83.1169	SRAE_2000389200	97.4026	SPAL_0000873700	97.4026	SVE_0731800	96.5368
SSTP_0001075600	PC1	0.016	A0A0K0EMR4		Homeobox_dom, Homeobox-like_sf, Homeobox_CS	sequence-specific DNA binding, regulation of transcription, DNA-templated, DNA binding, nucleus	unc-30	22.8426	SRAE_X000211000	64.467	SPAL_0000765000	58.8832	SVE_1668400	66.7513
SSTP_0001033100	PC1	0.016	A0A0K0ELI7		TF_T-box, p53-like_TF_DNA-bd, TF_T-box_CS, T-box_sf	DNA-binding transcription factor activity, regulation of transcription, DNA-templated, nucleus, DNA binding	mab-9	38.6423	SRAE_1000306800	66.0574	SPAL_0000556200	72.0627
SSTP_0001068000	PC1	0.016	A0A0K0EMJ1		Mpv17_PMP22	integral component of membrane, membrane			SRAE_1000126900	76.4103	SPAL_0000161300	73.3333
SSTP_0001112200	PC1	0.016	A0A0K0ENT5	Synaptosomal-associated protein	T_SNARE_dom, SNAP-25	NA	ric-4	83.1731	SRAE_2000477800	100	SPAL_0000605600	99.5192	SVE_1566800	99.5192
SSTP_0000937600	PC1	0.016	A0A0K0EIS0		DUF148	NA			SRAE_2000494000	53.11	SPAL_0001434100	42.5837	SVE_0336900	45.4545
SSTP_0001064300	PC1	0.016	A0A0K0EMF4		Prot_kinase_dom, Ser-Thr/Tyr_kinase_cat_dom, Tyr_kinase_AS, Kinase-like_dom_sf, Tyr_kinase_cat_dom, Ig-like_dom_sf	protein tyrosine kinase activity, protein phosphorylation, protein kinase activity, ATP binding, membrane, integral component of membrane, peptidyl-tyrosine phosphorylation			SRAE_1000090600	76.09	SPAL_0000732600	70.0422	SVE_1032400	69.4796
SSTP_0000622900	PC1	0.016	A0A0K0E9P7	Tetraspanin	Tetraspanin, Tetraspanin_EC2_sf, Tetraspanin/Peripherin	integral component of membrane, membrane	tsp-7	57.265	SRAE_1000189400	92.3077	SPAL_0000275300	97.8633	SVE_1891200	97.4359
SSTP_0001117800	PC1	0.016	A0A0K0ENZ1		GPCR_Rhodpsn_7TM	integral component of membrane, membrane			SRAE_X000259000	79.8742	SPAL_0001568100	74.4235	SVE_0599500	73.1656
SSTP_0000588200	PC1	0.016	A0A0K0E8Q0		TSP1_rpt, Pan_app, TSP1_rpt_sf	membrane, integral component of membrane	C36B7.5	23.2558					SVE_0010500	71.9919
SSTP_0000246300	PC1	0.016	A0A0K0DYZ7		NA	NA			SRAE_X000024500	69.3721	SPAL_0000529700	63.8591	SVE_0130600	61.7152
SSTP_0000433200	PC1	0.016	A0A0K0E4B3		Nucl_hrmn_rcpt_lig-bd, Znf_hrmn_rcpt, Znf_NHR/GATA, NHR-like_dom_sf	sequence-specific DNA binding, DNA-binding transcription factor activity, regulation of transcription, DNA-templated, nucleus, zinc ion binding, metal ion binding, DNA binding	nhr-97	27.0213	SRAE_X000172800	81.7021	SPAL_0001690000	72.3404	SVE_0662100	72.766
SSTP_0001121900	PC1	0.016	A0A0K0EP32		Small_GTPase, Small_GTP-bd_dom, Small_GTPase_Ras-type, P-loop_NTPase	GTPase activity, signal transduction, GTP binding, membrane, nucleotide binding	ssr-2	47.5884	SRAE_X000254400	88.4244	SPAL_0001090600	81.9936	SVE_0620300	77.492
SSTP_0000263200	PC1	0.016	A0A0K0DZH0		NA	membrane, integral component of membrane	R01E6.7	17.6955	SRAE_X000072100	67.0782	SPAL_0001556600	53.0864	SVE_0055500	66.2551
SSTP_0001127000	PC1	0.016	A0A0K0EP84		NA	NA
SSTP_0000124800	PC1	0.016	A0A0K0DVI1		Prot_kinase_dom, Ser/Thr_kinase_AS, Kinase-like_dom_sf	protein phosphorylation, protein kinase activity, ATP binding	F32D8.1	28.5124	SRAE_2000177400	81.1983	SPAL_0001018100	77.8926	SVE_0506600	75.8264
SSTP_0000060200	PC1	0.016	A0A0K0DTN9		DUF229, Alkaline_phosphatase_core_sf	catalytic activity, membrane, integral component of membrane	R03G8.3	23.0882	SRAE_X000212300	83.6765	SPAL_0000766300	73.8235	SVE_1698500	36.3235
SSTP_0001237100	PC1	0.016	A0A0K0ESE2		Pan_app	NA			SRAE_X000128600	56.6217	SPAL_0000111100	44.7	SVE_0138300	45.678
SSTP_0001223400	PC1	0.016	A0A0K0ES05		Pan_app	NA			SRAE_X000021100	88.9908	SPAL_0001217300	80.7339	SVE_0910700	81.1927
SSTP_0000043600	PC1	0.016	A0A0K0DT76		Methyltransf_11, SAM-dependent_MTases, ALKBH8	tRNA methylation, tRNA wobble uridine modification, tRNA (uracil) methyltransferase activity, methyltransferase activity	C35D10.12	37.037	SRAE_2000157900	93.1217	SPAL_0001683800	81.4815	SVE_1804300	81.4815
SSTP_0000318400	PC1	0.016	A0A0K0E122		PDZ, PDZ_sf	protein binding, membrane, integral component of membrane			SRAE_1000121600	79.803	SPAL_0000166700	77.1757	SVE_1673200	35.1396
SSTP_0000851200	PC1	0.016	A0A0K0EGA2		Carn_acyl_trans, Cho/carn_acyl_trans	transferase activity, transferring acyl groups	cha-1	46.1778	SRAE_X000207500	90.3276	SPAL_0000945000	81.9033	SVE_1696800	44.6178
SSTP_0000640700	PC1	0.016	A0A0K0EA79		ZP_dom	membrane, integral component of membrane	cutl-3	44.7619	SRAE_X000017400	85.2381	SPAL_0000057600	76.1905	SVE_0842100	76.4286
SSTP_0001052400	PC1	0.016	A0A0K0EM36		Netrin_domain, Laminin_EGF, Laminin_N, TIMP-like_OB-fold, EGF-like_CS, Netrin_module_non-TIMP, Laminin_N_sf	protein binding, extracellular region	unc-6	57.931	SRAE_X000060400	93.2759	SPAL_0001366100	87.931	SVE_1974400	88.1034
SSTP_0000881500	PC1	0.016	A0A0K0EH58		NA	NA			SRAE_X000151400	82.7298	SPAL_0001327600	75.766	SVE_0102900	73.2591
SSTP_0000177000	PC1	0.016	A0A0K0DX03		NA	NA			SRAE_2000115300	89.8305	SPAL_0001636600	85.3107	SVE_0429900	85.3107
SSTP_0000856700	PC1	0.016	A0A0K0EGF6		NA	NA			SRAE_X000229200	86.6242	SPAL_0000845500	84.0764	SVE_0109600	85.9873
SSTP_0000661000	PC1	0.016	A0A0K0EAT5	Metalloendopeptidase	Peptidase_M12A, ShKT_dom, Peptidase_Metallo, MetalloPept_cat_dom_sf, Astacin-like_dom	metalloendopeptidase activity, metallopeptidase activity, proteolysis, zinc ion binding, metal ion binding, hydrolase activity, peptidase activity	nas-12	38.2263	SRAE_X000090800	82.5688	SPAL_0000258200	59.9388	SVE_0224400	62.3853
SSTP_0000957800	PC1	0.016	A0A0K0EJD2		IL-17_fam, Cystine-knot_cytokine	cytokine activity, extracellular region, membrane, integral component of membrane, signal transduction
SSTP_0001121000	PC1	0.016	A0A0K0EP23	Innexin	Innexin	membrane, integral component of membrane, ion transport, plasma membrane, gap junction, cell junction	inx-1	80.3644	SRAE_X000253500	95.749	SPAL_0001089800	79.7571	SVE_0619400	95.1417
SSTP_0000386800	PC1	0.016	A0A0K0E2Z9		DUF273	membrane, integral component of membrane	F25H2.7	21.3777	SRAE_2000414700	74.5843	SPAL_0001434500	71.2589	SVE_0337300	70.5463
SSTP_0000437100	PC1	0.016	A0A0K0E4F1		Neurotrans-gated_channel_TM, Neur_channel, Neur_chan_lig-bd, Neurotransmitter_ion_chnl_CS, Neuro-gated_channel_TM_sf, Neur_chan_lig-bd_sf	extracellular ligand-gated ion channel activity, ion transmembrane transport, ion transport, ion channel activity, transmembrane signaling receptor activity, integral component of membrane, membrane	acr-24	47.1787	SRAE_X000176700	75.7053	SPAL_0000390200	68.9655	SVE_0658700	73.6677
SSTP_0000626800	PC1	0.016	A0A0K0E9T6		PAS, bHLH_dom, PAS_fold, PAS-like_dom_sf, HLH_DNA-bd_sf, AHR/AHRR	response to xenobiotic stimulus, xenobiotic metabolic process, protein dimerization activity, regulation of transcription, DNA-templated, nucleus	ahr-1	37.2855	SRAE_1000290700	90.0156	SPAL_0001120300	79.8752	SVE_0364200	72.5429
SSTP_0001124700	PC1	0.016	A0A0K0EP60		ConA-like_dom_sf	NA	mlt-9	41.6667	SRAE_X000196400	87.4113	SPAL_0001291900	81.7376	SVE_0840000	80.8511
SSTP_0000175000	PC1	0.016	A0A0K0DWY3		Col_cuticle_N	structural constituent of cuticle, membrane, integral component of membrane	col-103	40.4255	SRAE_2000247100	73.7589	SPAL_0000237800	73.0496	SVE_0478500	73.0496
SSTP_0000881300	PC1	0.016	A0A0K0EH56		Lipase_EstA/Esterase_EstB, AB_hydrolase	hydrolase activity	lips-9	55.7756	SRAE_X000151600	93.0693	SPAL_0001327400	89.1089	SVE_0103100	87.7888
SSTP_0001129300	PC1	0.016	A0A0K0EPA6		CRISP-related, CAP_domain, CAP_sf	NA			SRAE_2000129590	18.3099
SSTP_0000386700	PC1	0.016	A0A0K0E2Z8		NA	NA			SRAE_2000414600	89.6104	SPAL_0001434400	80.5195	SVE_0337200	80.5195
SSTP_0000785400	PC1	0.016	A0A0K0EEE2		Lipid-bd_serum_glycop_C, Bactericidal_perm-incr_a/b_dom, BPI/LBP/Plunc	lipid binding, membrane, integral component of membrane	C06E8.5	30.1786	SRAE_2000018900	81.6071	SPAL_0001426200	75	SVE_0541700	78.2143
SSTP_0000445100	PC1	0.016	A0A0K0E4N2		PMP22/EMP/MP20/Claudin	integral component of membrane, membrane	stg-1	42.6056	SRAE_X000056500	89.0845	SPAL_0000201400	86.2676	SVE_0039300	81.6901
SSTP_0000323400	PC1	0.016	A0A0K0E170		Arylesterase, 6-blade_b-propeller_TolB-like	arylesterase activity, membrane, integral component of membrane	mec-6	17.7305	SRAE_2000320400	67.1395	SPAL_0000286400	56.2648	SVE_1614100	74.4681
SSTP_0000499300	PC1	0.016	A0A0K0E661		DUF5346	NA	T25E4.1	19.8473	SRAE_X000096000	25	SPAL_0000414500	24.0458	SVE_0703900	25.3817
SSTP_0000377400	PC1	0.016	A0A0K0E2Q5		Globin-like_sf, Globin/Proto	oxygen binding, heme binding			SRAE_2000406200	79.2285	SPAL_0001318200	67.9525	SVE_1196600	69.4362
SSTP_0000436100	PC1	0.016	A0A0K0E4E2		LDrepeatLR_classA_rpt, LDLR_class-A_CS, LDL_receptor-like_sf	protein binding			SRAE_X000175900	38.1503	SPAL_0000802600	56.0694	SVE_0657400	61.2717
SSTP_0000421800	PC1	0.016	A0A0K0E400	Metalloendopeptidase	Peptidase_M12A, Peptidase_Metallo, MetalloPept_cat_dom_sf, Sperma_CUB_dom_sf	metalloendopeptidase activity, metallopeptidase activity, proteolysis, zinc ion binding, metal ion binding, hydrolase activity, peptidase activity			SRAE_2000453900	56.8528	SPAL_0000629300	45.9391
SSTP_0000558900	PC1	0.016	A0A0K0E7W1		NA	NA	ccep-290	22.9604	SRAE_1000269800	82.9254			SVE_1942300	74.4173
SSTP_0000054900	PC1	0.016	A0A0K0DTI7		MFS, MFS_dom, MFS_trans_sf	transmembrane transport, integral component of membrane, membrane	eat-4	61.165	SRAE_2000009500	92.0712	SPAL_0001637400	88.3495	SVE_0429200	89.1586
SSTP_0000817900	PC1	0.016	A0A0K0EFB6		Pan_app	NA			SRAE_1000114300	77.0115	SPAL_0001334300	74.5211	SVE_0333300	72.7969
SSTP_0000849700	PC1	0.016	A0A0K0EG87		NA	NA			SRAE_X000206000	78.7037	SPAL_0001281500	75.9259
SSTP_0000780800	PC1	0.016	A0A0K0EE96		CRAL-TRIO_dom, CRAL/TRIO_N_dom_sf, CRAL-TRIO_dom_sf	NA	F18A11.2	29.6386	SRAE_2000374200	92.0482	SPAL_0001742700	87.2289	SVE_0561800	86.506
SSTP_0001033500	PC1	0.016	A0A0K0ELJ1		Lipase_EstA/Esterase_EstB, AB_hydrolase	hydrolase activity	lips-3	66.5672	SRAE_1000307200	93.4328	SPAL_0000555800	90.4478
SSTP_0001143700	PC1	0.016	A0A0K0EPQ5		BTB/POZ_dom, SKP1/BTB/POZ_sf	protein binding	C03H5.6	46.2136	SRAE_0000056000	91.8447			SVE_0098200	88.1553
SSTP_0000521100	PC1	0.016	A0A0K0E6T5		NA	NA			SRAE_X000208700	59.5238
SSTP_0000764900	PC1	0.016	A0A0K0EDT7		Marvel	membrane, integral component of membrane	F28H1.4	50.2793	SRAE_2000280400	93.2961	SPAL_0001406300	91.0615	SVE_1721800	91.0615
SSTP_0000929100	PC1	0.016	A0A0K0EII6		NA	NA	F35D2.2	33.4278	SRAE_1000154100	52.6912	SPAL_0000157200	52.9745	SVE_1013900	64.3059
SSTP_0000128800	PC1	0.016	A0A0K0DVM2		DUF4440, NTF2-like_dom_sf	NA	F09E10.7	48.7342	SRAE_2000337600	94.3038	SPAL_0000222300	93.038	SVE_1739700	92.4051
SSTP_0000859400	PC1	0.016	A0A0K0EGI2	Carboxypeptidase	Peptidase_S10, Ser_caboxypep_ser_AS, AB_hydrolase, Ser_caboxypep_his_AS	serine-type carboxypeptidase activity, proteolysis, hydrolase activity, peptidase activity, carboxypeptidase activity	ctsa-4.1	48.3607	SRAE_X000040600	90.1639	SPAL_0001184700	85.4508	SVE_0106100	82.9918
SSTP_0000616200	PC1	0.016	A0A0K0E9H9		Collagen	NA			SRAE_X000054600	77.1739	SPAL_0000656500	48.913	SVE_0746100	69.1304
SSTP_0000931700	PC1	0.016	A0A0K0EIL1		GAS8	cell motility, Rab GTPase binding, microtubule binding			SRAE_1000156600	85.3211	SPAL_0000748600	79.1284	SVE_1016500	79.5872
SSTP_0000271500	PC1	0.016	A0A0K0DZQ3		TGF-b_C, TGF-beta-rel, TGFb_CS, Cystine-knot_cytokine	growth factor activity, signal transduction, extracellular region	tig-3	8.47107			SPAL_0001294100	78.0992	SVE_1967300	76.8595
SSTP_0000609000	PC1	0.016	A0A0K0E9A6		NA	NA
SSTP_0000851300	PC1	0.016	A0A0K0EGA3		Multidrug-R, MFS, MFS_dom, MFS_trans_sf	drug transport, transmembrane transport, integral component of membrane, membrane, xenobiotic transport, xenobiotic transmembrane transporter activity	unc-17	62.7486	SRAE_X000207600	86.4376	SPAL_0000945100	87.1609	SVE_1672900	84.8101
SSTP_0000248000	PC1	0.016	A0A0K0DZ15	Metalloendopeptidase	Peptidase_M12A, Peptidase_Metallo, MetalloPept_cat_dom_sf, Astacin-like_dom, Sperma_CUB_dom_sf	metalloendopeptidase activity, metallopeptidase activity, proteolysis, zinc ion binding, metal ion binding, hydrolase activity, membrane, integral component of membrane, peptidase activity	nas-30	32.2953	SRAE_2000088200	85.3518	SPAL_0000781900	83.8524	SVE_0426700	83.2757
SSTP_0000498900	PC1	0.016	A0A0K0E657		DNA-bd_RFX, WH-like_DNA-bd_sf, WH_DNA-bd_sf, RFX-like	DNA-binding transcription factor activity, regulation of transcription, DNA-templated, DNA binding	daf-19	22.6249	SRAE_X000094600	79.4319	SPAL_0000413900	64.7404	SVE_0703400	80.3134
SSTP_0000618400	PC1	0.016	A0A0K0E9K2		MFS, MFS_dom, MFS_trans_sf	transmembrane transport, integral component of membrane, membrane	Y71G12B.25	59.0571	SRAE_2000331800	95.2854	SPAL_0000216700	97.5186	SVE_1733800	97.0223
SSTP_0000622200	PC1	0.016	A0A0K0E9P0		NA	NA			SRAE_1000188700	72.7483	SPAL_0000274500	60.5081	SVE_1892000	61.2009
SSTP_0000859600	PC1	0.016	A0A0K0EGI4		CUT_dom, Lambda_DNA-bd_dom_sf	DNA binding			SRAE_X000040400	89.1837	SPAL_0001184500	81.2245	SVE_0106300	80.2041
SSTP_0001250100	PC1	0.016	A0A0K0ESS2		NA	membrane, integral component of membrane	R11F4.3	15.8228	SRAE_X000114500	81.3291	SPAL_0000696300	70.8861	SVE_0623900	66.2975
SSTP_0000484300	PC1	0.016	A0A0K0E5R0		Homeobox_dom, Homeobox_Antennapedia_CS, Homeobox-like_sf, Homeobox_CS, Homeobox_metazoa	sequence-specific DNA binding, DNA-binding transcription factor activity, regulation of transcription, DNA-templated, DNA binding, nucleus, multicellular organism development	mab-5	32.6087	SRAE_1000326000	98.5507	SPAL_0000699100	93.4783	SVE_1096700	94.9275
SSTP_0000907200	PC1	0.016	A0A0K0EHW7		NA	NA			SRAE_1000247900	65.9607	SPAL_0000152400	57.1861	SVE_0961200	57.6399
SSTP_0000956200	PC1	0.016	A0A0K0EJB6		Glyco_transf_92	NA			SRAE_2000473600	78.6177	SPAL_0000593800	72.3542	SVE_0354800	71.0583
SSTP_0001028000	PC1	0.016	A0A0K0ELD6		2pore_dom_K_chnl, K_chnl_dom	potassium ion transmembrane transport, potassium channel activity, membrane, integral component of membrane, ion transport	twk-8	33.8592	SRAE_X000238100	80.5825	SPAL_0001473400	69.1748	SVE_1684700	43.932
SSTP_0000731800	PC1	0.016	A0A0K0ECV2		Ground-like_dom	NA			SRAE_0000015200	67.2222	SPAL_0001233400	48.8889	SVE_0753600	57.2222
SSTP_0000876800	PC1	0.016	A0A0K0EH11	Kinesin-like protein	Kinesin_motor_dom, Kinesin_motor_CS, P-loop_NTPase, Kinesin-like_fam, Kinesin_motor_dom_sf	microtubule-based movement, microtubule motor activity, microtubule binding, ATP binding, nucleotide binding, microtubule, motor activity	osm-3	59.0585	SRAE_X000156300	93.1526	SPAL_0000383300	87.0185	SVE_0783100	87.0185
SSTP_0000273200	PC1	0.016	A0A0K0DZS0		NA	NA			SRAE_X000224500	69.4056	SPAL_0001374500	54.7203	SVE_0227700	59.4406
SSTP_0000845700	PC1	0.016	A0A0K0EG48		DB	NA	F26G1.5	42.9864	SRAE_X000210100	67.4208	SPAL_0000947500	67.4208	SVE_1671600	69.6833
SSTP_0000059600	PC1	0.016	A0A0K0DTN4		NA	NA			SRAE_X000211700	67.6636	SPAL_0000765700	49.8131	SVE_1690300	15.0467
SSTP_0000151500	PC1	0.016	A0A0K0DW99		Calycin, ILBP	lipid binding			SRAE_2000148200	74.7059	SPAL_0000913300	64.1176	SVE_0188000	63.5294
SSTP_0000831200	PC1	0.016	A0A0K0EFQ2		NA	membrane, integral component of membrane			SRAE_2000481900	88.4956	SPAL_0000598400	85.8407
SSTP_0001040600	PC1	0.016	A0A0K0ELR5		NA	NA
SSTP_0000262000	PC1	0.016	A0A0K0DZF8		NA	membrane, integral component of membrane	F21E9.2	27.8107	SRAE_X000073300	91.1243	SPAL_0001557800	90.5325	SVE_0054300	89.9408
SSTP_0000269600	PC1	0.016	A0A0K0DZN5		PLipase_A2_His_AS, PLipase_A2_dom_sf	arachidonic acid secretion, phospholipid metabolic process, phospholipase A2 activity, membrane, integral component of membrane, extracellular region			SRAE_1000091800	90.303	SPAL_0000818700	74.5455	SVE_0202500	64.8485
SSTP_0000993700	PC1	0.016	A0A0K0EKE3		Paired_dom, Homeobox-like_sf, WH-like_DNA-bd_sf	regulation of transcription, DNA-templated, DNA binding, nucleus, multicellular organism development	npax-2	36.0563	SRAE_1000101800	89.0141
SSTP_0000452300	PC1	0.016	A0A0K0E4V4		NA	NA	Y57G11C.38	35.9862					SVE_0045100	68.1661
SSTP_0000469300	PC1	0.016	A0A0K0E5A9		Transposase_1, Homeobox-like_sf, WH-like_DNA-bd_sf, Mos1_HTH	DNA binding			SRAE_X000208700	23.0089
SSTP_0000696500	PC1	0.016	A0A0K0EBU5		Ground-like_dom	NA			SRAE_2000390200	82.9787	SPAL_0000875000	78.0142	SVE_0730400	64.539
SSTP_0000343600	PC1	0.016	A0A0K0E1R8		Col_cuticle_N, Collagen	structural constituent of cuticle, membrane, integral component of membrane	col-14	64.2857	SRAE_1000214900	87.8882	SPAL_0000701700	87.8882	SVE_1842600	87.5776
SSTP_0001087100	PC1	0.016	A0A0K0EN34		SSD, Ptc/Disp	integral component of membrane, membrane	ptr-18	54.7106	SRAE_X000037000	88.4222	SPAL_0001074200	85.8116	SVE_1977600	85.6981
SSTP_0000675700	PC1	0.016	A0A0K0EB86		Znf_GATA, Znf_NHR/GATA, Transcription_factor_GATA	sequence-specific DNA binding, DNA-binding transcription factor activity, regulation of transcription, DNA-templated, zinc ion binding, metal ion binding, nucleus	egl-18	9.47581	SRAE_X000219700	83.4677	SPAL_0000662000	80.4436	SVE_0847100	65.5242
SSTP_0000245400	PC1	0.016	A0A0K0DYY8		HTH_motif, Homeobox_dom, Homeobox-like_sf, Homeobox_CS, Homeobox_metazoa	sequence-specific DNA binding, regulation of transcription, DNA-templated, DNA binding, nucleus	vab-15	37.4582	SRAE_X000023600	89.2977	SPAL_0000530600	36.7893	SVE_0131600	75.5853
SSTP_0001054600	PC1	0.016	A0A0K0EM58		Myosin_head_motor_dom, Myosin_S1_N, Myosin_IQ_contain_sf, P-loop_NTPase, Kinesin_motor_dom_sf	actin filament binding, myosin complex, motor activity, ATP binding, nucleotide binding, actin binding			SRAE_X000181100	86.3513	SPAL_0000923300	79.0541	SVE_0628000	78.9189
SSTP_0000073900	PC1	0.016	A0A0K0DU23		NA	membrane, integral component of membrane			SRAE_1000167800	87.6307	SPAL_0000850900	83.6237	SVE_0739000	82.0557
SSTP_0000820700	PC1	0.016	A0A0K0EFE4		NA	NA			SRAE_1000097500	69.0299	SPAL_0000857100	63.806	SVE_1051900	62.6866
SSTP_0000660900	PC1	0.016	A0A0K0EAT4		GPCR_Rhodpsn, GPCR_Rhodpsn_7TM	G protein-coupled receptor signaling pathway, G protein-coupled receptor activity, integral component of membrane, membrane, signal transduction			SRAE_X000090900	84.6774	SPAL_0000258100	72.9839	SVE_0224300	64.7177
SSTP_0000544100	PC1	0.016	A0A0K0E7G4		NA	NA			SRAE_1000306200	75	SPAL_0000556900	67.2414
SSTP_0000386200	PC1	0.015	A0A0K0E2Z3	Metalloendopeptidase	Peptidase_M12A, Peptidase_Metallo, EGF-like_CS, MetalloPept_cat_dom_sf, Astacin-like_dom	metalloendopeptidase activity, metallopeptidase activity, proteolysis, zinc ion binding, metal ion binding, hydrolase activity, peptidase activity					SPAL_0000113000	40.5685	SVE_1567900	40.8269
SSTP_0001229700	PC1	0.015	A0A0K0ES69		Col_cuticle_N, Collagen	structural constituent of cuticle, membrane, integral component of membrane	col-109	67.2414	SRAE_X000188400	93.4483	SPAL_0001678200	90.3448
SSTP_0000526600	PC1	0.015	A0A0K0E6Z2		AB_hydrolase_3, Arylacetamide_deacetylase, AB_hydrolase	carboxylic ester hydrolase activity, hydrolase activity, integral component of membrane	F16F9.4	31.941			SPAL_0000254300	71.0074	SVE_0256100	70.516
SSTP_0001211400	PC1	0.015	A0A0K0ERN4		NA	NA	F35D2.2	36.3388	SRAE_2000476000	53.5519	SPAL_0001067100	61.7486	SVE_1654000	80.8743
SSTP_0000612000	PC1	0.015	A0A0K0E9D7		SDR_fam, Sc_DH/Rdtase_CS, NAD(P)-bd_dom_sf	oxidoreductase activity, oxidation-reduction process			SRAE_1000066600	85.4985	SPAL_0001168300	31.1178	SVE_0682900	77.3414
SSTP_0000522300	PC1	0.015	A0A0K0E6U8		NA	NA
SSTP_0000223900	PC1	0.015	A0A0K0DYC5		NA	NA			SRAE_2000351600	86.5385	SPAL_0001049700	80.7692	SVE_1774800	78.8462
SSTP_0001023500	PC1	0.015	A0A0K0EL92		ARD, RmlC_Cupin_sf, RmlC-like_jellyroll	acireductone dioxygenase [iron(II)-requiring] activity, oxidation-reduction process	T01D1.4	54.491	SRAE_X000243400	89.8204	SPAL_0000985500	85.6287	SVE_0295400	83.8323
SSTP_0000264900	PC1	0.015	A0A0K0DZI7		NA	membrane, integral component of membrane			SRAE_X000070500	77.037	SPAL_0001611400	45.9259	SVE_0057300	58.5185
SSTP_0001171700	PC1	0.015	A0A0K0EQI8		HMG_box_dom, HMG_box_dom_sf	nucleus, DNA binding	sox-2	30.663	SRAE_0000031500	96.1326	SPAL_0001590700	95.0276	SVE_0995900	94.4751
SSTP_0000473900	PC1	0.015	A0A0K0E5F4		MOLO1	acetylcholine-gated channel complex, membrane, integral component of membrane			SRAE_X000005700	85.7605	SPAL_0001130900	69.9029	SVE_0121100	74.7573
SSTP_0001203900	PC1	0.015	A0A0K0ERF9		Prot_kinase_dom, Ser/Thr_kinase_AS, Kinase-like_dom_sf, Protein_kinase_ATP_BS	protein phosphorylation, protein kinase activity, ATP binding, nucleotide binding, protein serine/threonine kinase activity	cdkl-1	57.8947	SRAE_1000001300	90.6433	SPAL_0001186400	88.0117	SVE_0872000	88.0117
SSTP_0000100000	PC1	0.015	A0A0K0DUT3		NA	NA					SPAL_0000183900	63.0435	SVE_1225500	69.5652
SSTP_0000061600	PC1	0.015	A0A0K0DTQ2		GPCR_Rhodpsn, GPCR_Rhodpsn_7TM	G protein-coupled receptor signaling pathway, G protein-coupled receptor activity, integral component of membrane, membrane, signal transduction	npr-35	42.9688
SSTP_0000190100	PC1	0.015	A0A0K0DXD6		Neur_channel, Neur_chan_lig-bd, Neuro-gated_channel_TM_sf, Neur_chan_lig-bd_sf	extracellular ligand-gated ion channel activity, ion transmembrane transport, ion transport, ion channel activity, transmembrane signaling receptor activity, integral component of membrane, membrane			SRAE_2000006600	87.715	SPAL_0000879700	78.6241
SSTP_0000369900	PC1	0.015	A0A0K0E2H9		Leu-rich_rpt, LRR_5, LRR_dom_sf	protein binding, membrane, integral component of membrane	lron-12	27.7108	SRAE_2000330800	82.1687	SPAL_0000215600	81.4458	SVE_1732800	77.8313
SSTP_0000080500	PC1	0.015	A0A0K0DU91	Hexosyltransferase	Glyco_trans_31	protein glycosylation, galactosyltransferase activity, membrane, transferase activity, integral component of membrane, Golgi apparatus, transferase activity, transferring glycosyl groups, Golgi membrane	bus-17	37.7404	SRAE_2000392000	80.7692	SPAL_0000313400	74.7596	SVE_1586800	74.5192
SSTP_0000600100	PC1	0.015	A0A0K0E917		NA	NA			SRAE_1000267300	89.8734	SPAL_0000268200	88.6076	SVE_1898400	88.6076
SSTP_0000584850	PC1	0.015	A0A0K0E8L6		Ground-like_dom	NA	grl-8	31.5068	SRAE_1000133250	80.8219	SPAL_0001086500	80.8219	SVE_0954100	80.8219
SSTP_0000276000	PC1	0.015	A0A0K0DZV0		Ets_dom, WH-like_DNA-bd_sf, WH_DNA-bd_sf	sequence-specific DNA binding, DNA-binding transcription factor activity, regulation of transcription, DNA-templated, nucleus, DNA binding			SRAE_X000059700	95.9596	SPAL_0000673800	92.9293	SVE_1099900	92.9293
SSTP_0001078300	PC1	0.015	A0A0K0EMU5		NA	membrane, integral component of membrane	C30G7.2	37.2881	SRAE_1000087000	83.8983	SPAL_0001295200	77.1186	SVE_0264600	72.4576
SSTP_0000993400	PC1	0.015	A0A0K0EKE0		NA	membrane, integral component of membrane			SRAE_1000101400	83.0357	SPAL_0000243800	85.7143	SVE_0001400	83.0357
SSTP_0000377000	PC1	0.015	A0A0K0E2Q1		AA-permease/SLC12A_dom, SLC12_C	ion transport, transporter activity, transmembrane transport, membrane, integral component of membrane			SRAE_2000405800	87.8286	SPAL_0000613800	76.3389	SVE_0699100	81.11
SSTP_0001232600	PC1	0.015	A0A0K0ES98		Prot_kinase_dom, Ser/Thr_kinase_AS, Kinase-like_dom_sf, Protein_kinase_ATP_BS	protein phosphorylation, protein kinase activity, ATP binding	F49C5.4	37.8521	SRAE_X000133400	84.6831	SPAL_0000360300	79.0493	SVE_0708300	85.0352
SSTP_0000409100	PC1	0.015	A0A0K0E3L9		NA	membrane, integral component of membrane			SRAE_2000346400	80.8917	SPAL_0000232200	75.1592	SVE_1749900	71.6561
SSTP_0000086900	PC1	0.015	A0A0K0DUF6		GM2-AP_sf	membrane, integral component of membrane	C26B9.3	65.9341	SRAE_2000398600	94.1392	SPAL_0000432200	91.2088	SVE_0286800	91.2088
SSTP_0000200000	PC1	0.015	A0A0K0DXN5		GPCR_Rhodpsn, GPCR_Rhodpsn_7TM	G protein-coupled receptor signaling pathway, G protein-coupled receptor activity, integral component of membrane, membrane	F59D12.1	42.7692	SRAE_2000518400	96.9231	SPAL_0000686600	96	SVE_1328500	95.0769
SSTP_0000130400	PC1	0.015	A0A0K0DVN8		Col_cuticle_N, Collagen	structural constituent of cuticle	rol-6	42.6554	SRAE_2000339100	93.2203	SPAL_0000224000	92.0904	SVE_1741400	92.9379
SSTP_0000645700	PC1	0.015	A0A0K0EAD2		NA	NA			SRAE_2000520300	75.4286	SPAL_0000595700	71.8095	SVE_0352700	70.4762
SSTP_0000442000	PC1	0.015	A0A0K0E4K0	Innexin	Innexin	membrane, integral component of membrane, ion transport, plasma membrane, gap junction, cell junction	unc-9	96.8912	SRAE_X000198800	99.4819	SPAL_0000671100	96.3731	SVE_0112400	99.7409
SSTP_0000324900	PC1	0.015	A0A0K0E185		NA	NA			SRAE_2000307600	65.3295	SPAL_0000300700	59.5989	SVE_1599600	59.0258
SSTP_0001222600	PC1	0.015	A0A0K0ERZ7		NA	membrane, integral component of membrane			SRAE_X000020200	89.604	SPAL_0000072100	82.6733	SVE_0911600	82.6733
SSTP_0000501400	PC1	0.015	A0A0K0E683	Metalloendopeptidase	Peptidase_M12A, ShKT_dom, Peptidase_Metallo, MetalloPept_cat_dom_sf, Astacin-like_dom	metalloendopeptidase activity, metallopeptidase activity, proteolysis, zinc ion binding, metal ion binding, hydrolase activity, peptidase activity	nas-14	57.2243	SRAE_X000098100	85.3612	SPAL_0000403900	80.2281	SVE_0706200	80.2281
SSTP_0000542400	PC1	0.015	A0A0K0E7E7		EGF-like_CS, Ig-like_fold, Ig_E-set	NA			SRAE_1000163600	69.9241	SPAL_0000649200	57.8759	SVE_1060700	64.4355
SSTP_0000321800	PC1	0.015	A0A0K0E156		BTB/POZ_dom, T1-type_BTB, K_chnl_volt-dep_Kv, K_chnl_volt-dep_Kv3, Ion_trans_dom, SKP1/BTB/POZ_sf, Volt_channel_dom_sf, VG_K_chnl	voltage-gated potassium channel complex, potassium ion transport, voltage-gated potassium channel activity, protein homooligomerization, ion transport, ion channel activity, protein binding, transmembrane transport, membrane, integral component of membrane, voltage-gated ion channel activity, potassium channel activity, regulation of ion transmembrane transport, potassium ion transmembrane transp…	egl-36	58.7542	SRAE_1000007600	95.4545	SPAL_0001181600	85.8586	SVE_0327000	88.3838
SSTP_0000650100	PC1	0.015	A0A0K0EAH6		Gprotein_alpha_su, Gprotein_alpha_I, GproteinA_insert, P-loop_NTPase	adenylate cyclase-modulating G protein-coupled receptor signaling pathway, G-protein beta/gamma-subunit complex binding, guanyl nucleotide binding, G protein-coupled receptor signaling pathway, GTPase activity, signal transduction, GTP binding, nucleotide binding, metal ion binding	gpa-7	77.7228	SRAE_X000046600	97.0297	SPAL_0000147400	85.8911	SVE_1967800	85.6436
SSTP_0000634200	PC1	0.015	A0A0K0EA10		NA	NA			SRAE_1000317500	82.1782			SVE_0399300	50.495
SSTP_0000411600	PC1	0.015	A0A0K0E3P4		Pan_app	NA			SRAE_2000348900	73.6453	SPAL_0000461000	68.2266	SVE_1752400	61.5764
SSTP_0000474400	PC1	0.015	A0A0K0E5F9		Col_cuticle_N, Collagen	structural constituent of cuticle, membrane, integral component of membrane	dpy-2	30.3207	SRAE_X000006300	44.7522	SPAL_0001130200	43.0029	SVE_0121800	39.6501
SSTP_0000406500	PC1	0.015	A0A0K0E3J3		GABAA/Glycine_rcpt, Neurotrans-gated_channel_TM, Neur_channel, Neur_chan_lig-bd, Neurotransmitter_ion_chnl_CS, Neuro-gated_channel_TM_sf, Neur_chan_lig-bd_sf	extracellular ligand-gated ion channel activity, ion transmembrane transport, ion transport, ion channel activity, transmembrane signaling receptor activity, integral component of membrane, membrane, plasma membrane	lgc-46	49.6795	SRAE_2000088700	73.3974	SPAL_0000789400	73.7179	SVE_1835800	80.1282
SSTP_0001244500	PC1	0.015	A0A0K0ESL5		FMRFamid-related_peptide-like	neuropeptide signaling pathway			SRAE_X000120500	72.7273	SPAL_0001444800	60.9091	SVE_0144300	60
SSTP_0000520800	PC1	0.015	A0A0K0E6T2		Sulfotransferase, Chst-1	positive regulation of response to oxidative stress, chondroitin sulfate biosynthetic process, chondroitin 4-sulfotransferase activity, sulfotransferase activity, integral component of membrane, membrane			SRAE_1000043000	65.7216	SPAL_0001098200	67.268	SVE_0088400	67.5258
SSTP_0000403200	PC1	0.015	A0A0K0E3G0		OSCP1	NA	R10F2.5	16.4319	SRAE_2000225100	84.2723	SPAL_0001572600	69.953	SVE_1789300	76.9953
SSTP_0000634000	PC1	0.015	A0A0K0EA08		C2_dom, SYT12, C2_domain_sf	long-term synaptic potentiation, regulation of neurotransmitter secretion, membrane	sue-1	23.2643	SRAE_1000317300	69.0621	SPAL_0000277600	69.0621	SVE_0399500	73.3252
SSTP_0001244600	PC1	0.015	A0A0K0ESL6		NA	NA			SRAE_X000120400	78.5047	SPAL_0001444700	56.0748	SVE_0144400	57.9439
SSTP_0001278300	PC1	0.015	A0A0K0ETK7		Znf_RING, Znf_PHD, PE/DAG-bd, TPR-like_helical_dom_sf, TPR-contain_dom, Znf_RING/FYVE/PHD, Rapsyn_myristoylation/link_N, TPR_repeat	chemical synaptic transmission, protein membrane anchor, acetylcholine receptor binding, intracellular signal transduction, protein binding	rpy-1	50.6826	SRAE_X000104000	85.1536	SPAL_0001470600	81.058	SVE_0823700	82.5939
SSTP_0000953300	PC1	0.015	A0A0K0EJ84	Transporter	Na/ntran_symport, SNS_sf	neurotransmitter:sodium symporter activity, integral component of membrane, membrane, transmembrane transport, neurotransmitter transport, symporter activity	dat-1	59.2248	SRAE_2000329000	90.5426	SPAL_0000213700	90.2326	SVE_1731100	92.4031
SSTP_0000942300	PC1	0.015	A0A0K0EIW7		NA	NA			SRAE_2000512400	92.9577	SPAL_0000984300	88.7324	SVE_1571100	87.5587
SSTP_0000853500	PC1	0.015	A0A0K0EGC5		Pan_app	NA			SRAE_X000203400	72.9443	SPAL_0001307700	56.7639	SVE_0358500	56.4987
SSTP_0000296850	PC1	0.015	A0A0K0E0F5		NA	NA					SPAL_0001601300	67.4419	SVE_0808700	62.7907
SSTP_0000361400	PC1	0.015	A0A0K0E292		Cyt_B5-like_heme/steroid-bd, Cyt_B5_heme-BS, Cyt_B5-like_heme/steroid_sf	heme binding, metal ion binding			SRAE_2000367900	88.4956
SSTP_0000208200	PC1	0.015	A0A0K0DXW8		NA	NA			SRAE_2000413500	83.1804	SPAL_0001737800	76.4526	SVE_1620900	76.4526
SSTP_0001070000	PC1	0.015	A0A0K0EML1	Zinc metalloproteinase	EGF-like_dom, CUB_dom, TSP1_rpt, Peptidase_M12A, Peptidase_Metallo, EGF-like_CS, Metallopeptidase_nem, MetalloPept_cat_dom_sf, Astacin-like_dom, Sperma_CUB_dom_sf, TSP1_rpt_sf	molting cycle, collagen and cuticulin-based cuticle, metalloendopeptidase activity, metallopeptidase activity, proteolysis, zinc ion binding, metal ion binding, hydrolase activity, peptidase activity, extracellular region	nas-37	44.2136	SRAE_1000124800	80.1187	SPAL_0000163700	75.0742
SSTP_0000242500	PC1	0.015	A0A0K0DYV9		NA	NA					SPAL_0000592900	60.7477	SVE_1884400	82.243
SSTP_0000475700	PC1	0.015	A0A0K0E5H2		DB	NA					SPAL_0000669400	83.2168	SVE_1184300	83.9161
SSTP_0000481700	PC1	0.015	A0A0K0E5M9		NA	NA
SSTP_0001068100	PC1	0.015	A0A0K0EMJ2		2pore_dom_K_chnl, K_chnl_dom	potassium ion transmembrane transport, potassium channel activity, membrane, integral component of membrane, ion transport			SRAE_1000126800	81.7236	SPAL_0000161400	78.9004	SVE_1695500	55.8692
SSTP_0000060100	PC1	0.015	A0A0K0DTN8		NA	NA			SRAE_X000212200	87.6106	SPAL_0000766200	86.7257
SSTP_0001090400	PC1	0.015	A0A0K0EN67		Cyt_P450, Cyt_P450_E_grp-I, Cyt_P450_CS, Cyt_P450_sf	oxidoreductase activity, acting on paired donors, with incorporation or reduction of molecular oxygen, iron ion binding, heme binding, oxidation-reduction process, metal ion binding, oxidoreductase activity, membrane, integral component of membrane, monooxygenase activity	cyp-23A1	47.0037	SRAE_X000032600	87.2659	SPAL_0001193000	83.3333	SVE_1980900	82.397
SSTP_0001091400	PC1	0.015	A0A0K0EN77		Leu-rich_rpt, Leu-rich_rpt_typical-subtyp, LRR_dom_sf	protein binding, membrane, integral component of membrane	lron-1	28.2051	SRAE_X000031500	81.1966	SPAL_0001609100	73.9316	SVE_1982400	70.7977
SSTP_0000312000	PC1	0.015	A0A0K0E0V8		Adenylat/UMP-CMP_kin, P-loop_NTPase	nucleobase-containing compound kinase activity, nucleobase-containing compound metabolic process, ATP binding, phosphorylation	F13E6.2	36.6961	SRAE_1000198300	70.3657	SPAL_0001587300	70.1135	SVE_0992400	68.9786
SSTP_0001280100	PC1	0.015	A0A0K0ETM5		NA	membrane, integral component of membrane			SRAE_X000102200	81.7406	SPAL_0001471200	69.4539	SVE_1137800	67.2355
SSTP_0001238600	PC1	0.015	A0A0K0ESF7		NA	NA			SRAE_X000127100	80.2559	SPAL_0000108100	66.362	SVE_0134700	66.5448
SSTP_0000360500	PC1	0.015	A0A0K0E283		NA	membrane, integral component of membrane	K01B6.3	40.413	SRAE_2000164500	83.1858	SPAL_0001625100	78.1711	SVE_0441700	82.3009
SSTP_0000050600	PC1	0.015	A0A0K0DTE4		FMRFamid-related_peptide-like	neuropeptide signaling pathway, membrane, integral component of membrane			SRAE_2000302200	87.8788	SPAL_0000306700	82.5758	SVE_1593600	83.3333
SSTP_0000949400	PC1	0.015	A0A0K0EJ43		NA	NA			SRAE_2000464000	64.4928	SPAL_0001428600	55.7971
SSTP_0001165800	PC1	0.015	A0A0K0EQC9		NA	NA	F35A5.4	29.2434	SRAE_1000055100	73.6196	SPAL_0001496300	69.5297	SVE_0080000	71.3701
SSTP_0001121100	PC1	0.015	A0A0K0EP24		NA	membrane, integral component of membrane			SRAE_X000253600	73.9407	SPAL_0001089900	55.9322	SVE_0619500	59.322
SSTP_0000803400	PC1	0.015	A0A0K0EEX0		NA	membrane, integral component of membrane			SRAE_2000076300	59.1988	SPAL_0000045500	42.8783	SVE_1958800	43.4718
SSTP_0000603100	PC1	0.015	A0A0K0E947		DUF1459	NA			SRAE_1000336300	90	SPAL_0000953700	84.4444	SVE_0314700	82.2222
SSTP_0001134400	PC1	0.015	A0A0K0EPG0		NA	NA			SRAE_1000201500	74.1573	SPAL_0001584100	76.4045	SVE_0989200	71.9101
SSTP_0000164100	PC1	0.015	A0A0K0DWM4		Gp-FAR-1	lipid binding			SRAE_2000490700	65.3846	SPAL_0000410900	57.6923	SVE_1570100	54.9451
SSTP_0001146800	PC1	0.015	A0A0K0EPT6		NA	membrane, integral component of membrane			SRAE_1000064000	48.2927	SPAL_0000867700	35.6098	SVE_1230600	34.1463
SSTP_0001020200	PC1	0.015	A0A0K0EL58		NA	membrane, integral component of membrane
SSTP_0000481400	PC1	0.015			NA	NA	elt-6	15.873	SRAE_0000069500	62.585	SPAL_0000091200	42.4036	SVE_0122600	68.4807
SSTP_0000267900	PC1	0.015	A0A0K0DZL7		NA	NA			SRAE_1000041100	76.3158	SPAL_0000444600	69.7368	SVE_1055800	71.0526
SSTP_0000001900	PC1	0.015	A0A0K0DS04	Carboxylic ester hydrolase	Cholinesterase, CarbesteraseB, Carboxylesterase_B_AS, AB_hydrolase	cholinesterase activity, hydrolase activity	ace-3	55.2066	SRAE_X000026100	94.5455	SPAL_0001358000	86.4463	SVE_0059700	87.6033
SSTP_0000960000	PC1	0.015	A0A0K0EJF4		ENaC	membrane, sodium ion transport, sodium channel activity, integral component of membrane, ion transport, sodium ion transmembrane transport	del-6	34.4603	SRAE_0000011800	62.6788	SPAL_0000510700	60.2081	SVE_0214500	65.9298
SSTP_0000890500	PC1	0.015	A0A0K0EHE8		NA	NA
SSTP_0000165900	PC1	0.015	A0A0K0DWP2		Znf_C2H2_type, Znf_C2H2_sf	nucleic acid binding			SRAE_2000529000	76.2791	SPAL_0000614400	42.093	SVE_0901200	65.5814
SSTP_0001238500	PC1	0.015	A0A0K0ESF6		Fork_head_dom, TF_fork_head_CS_2, WH-like_DNA-bd_sf, WH_DNA-bd_sf	sequence-specific DNA binding, DNA-binding transcription factor activity, regulation of transcription, DNA-templated, nucleus, DNA binding			SRAE_X000127200	89.4879	SPAL_0000108000	80.3234	SVE_0134600	64.69
SSTP_0000696000	PC1	0.015	A0A0K0EBU0		NA	NA			SRAE_2000390700	70.3226	SPAL_0000875600	61.5054	SVE_0729600	68.172
SSTP_0000870200	PC1	0.015	A0A0K0EGU2		RD3	NA			SRAE_X000008000	67.5799	SPAL_0000016400	40.6393	SVE_0124100	51.1416
SSTP_0000500900	PC1	0.015	A0A0K0E678		NA	membrane, integral component of membrane			SRAE_X000097600	97.2222	SPAL_0000404500	64.4444	SVE_0705600	85.5556
SSTP_0000488600	PC1	0.015	A0A0K0E5V2		NA	NA			SRAE_X000047300	86.6995	SPAL_0001499100	76.3547	SVE_1968600	77.3399
SSTP_0000553200	PC1	0.015	A0A0K0E7Q7		GABAAb_rcpt, GABAA/Glycine_rcpt, Neurotrans-gated_channel_TM, Neur_channel, Neur_chan_lig-bd, Neurotransmitter_ion_chnl_CS, Neuro-gated_channel_TM_sf, Neur_chan_lig-bd_sf	GABA-A receptor activity, extracellular ligand-gated ion channel activity, ion transmembrane transport, ion transport, ion channel activity, transmembrane signaling receptor activity, integral component of membrane, membrane, plasma membrane	gab-1	50.4378	SRAE_1000338000	85.6392	SPAL_0001562300	84.5884	SVE_0861400	85.8144
SSTP_0001090300	PC1	0.015	A0A0K0EN66		bHLH_dom, HLH_DNA-bd_sf, Myogenic_factor	muscle organ development, protein dimerization activity, regulation of transcription, DNA-templated	hlh-1	19.2214	SRAE_X000032700	92.7007	SPAL_0001192900	81.7518	SVE_1980800	77.129
SSTP_0000850900	PC1	0.015	A0A0K0EG99		NA	NA			SRAE_X000207200	78.1915	SPAL_0000944700	68.9716
SSTP_0001140300	PC1	0.015	A0A0K0EPL7		Ig-like_dom, Ig-like_fold, Ig-like_dom_sf	NA			SRAE_1000219600	68	SPAL_0001213900	58.3333	SVE_0639300	55.3333
SSTP_0000869900	PC1	0.015	A0A0K0EGT9		EF_hand_dom, EF-hand-dom_pair, EF_Hand_1_Ca_BS	calcium ion binding, membrane, integral component of membrane	cal-4	53.2895	SRAE_X000007800	92.1053	SPAL_0000016200	92.1053	SVE_0124300	91.7763
SSTP_0000048800	PC1	0.015	A0A0K0DTC5		Lamin_tail_dom, Intermed_filament_ifa/ifb, Lamin_tail_dom_sf, IF_rod_dom	structural molecule activity, intermediate filament	mua-6	61.8307	SRAE_2000327400	97.9275	SPAL_0001413900	94.4732	SVE_1729300	94.3005
SSTP_0000136100	PC1	0.015	A0A0K0DVU5		NA	NA			SRAE_2000344400	66.6667	SPAL_0000230100	62.069
SSTP_0001029600	PC1	0.015	A0A0K0ELF2		ShKT_dom, Cys_repeat_1	NA			SRAE_1000167100	69.8675	SPAL_0000143700	61.5894
SSTP_0000622400	PC1	0.015	A0A0K0E9P2		Col_cuticle_N, Collagen	structural constituent of cuticle, membrane, integral component of membrane	col-34	78.1457	SRAE_1000188900	91.3907	SPAL_0000274700	88.0795	SVE_1891800	88.0795
SSTP_0000778100	PC1	0.015	A0A0K0EE69		GPCR_Rhodpsn, GPCR_Rhodpsn_7TM	G protein-coupled receptor signaling pathway, G protein-coupled receptor activity, integral component of membrane, membrane	sro-1	11.1111	SRAE_2000376700	71.8157	SPAL_0000282100	74.2547	SVE_0564300	74.7967
SSTP_0000951100	PC1	0.015	A0A0K0EJ61		NA	membrane, integral component of membrane			SRAE_0000026650	56.974	SPAL_0001375100	29.3144	SVE_0572300	47.0449
SSTP_0000257900	PC1	0.015	A0A0K0DZB3		IQ_motif_EF-hand-BS, FERM_domain, MyTH4_dom, SH3_domain, Myosin_head_motor_dom, Myosin_S1_N, PH-like_dom_sf, FERM/acyl-CoA-bd_prot_sf, FERM_central, Band_41_domain, P-loop_NTPase, Ubiquitin-like_domsf, FERM_2, MYSc_Myo7, Kinesin_motor_dom_sf, MyTH4_dom_sf, MyoVII_FERM_C1, MyoVII_FERM_C2	cytoskeleton, actin filament binding, myosin complex, motor activity, protein binding, ATP binding, nucleotide binding, actin binding	hum-6	48.472	SRAE_2000440300	90.0799	SPAL_0001431400	85.2374	SVE_0576800	84.0621
SSTP_0000295200	PC1	0.015	A0A0K0E0D8		NA	NA			SRAE_1000026100	61.6667	SPAL_0001603000	55.5556	SVE_0810800	52.7778
SSTP_0000435800	PC1	0.015	A0A0K0E4D9		DOMON_domain, RGS, RGS_sf	NA	rgs-3	27.6042	SRAE_X000175300	54.3403	SPAL_0000803200	51.9097	SVE_0656900	47.7431
SSTP_0000938900	PC1	0.015	A0A0K0EIT3		NA	NA			SRAE_2000495200	73.301	SPAL_0001717800	70.8738	SVE_0375800	67.4757
SSTP_0000572600	PC1	0.015	A0A0K0E895		NA	membrane, integral component of membrane			SRAE_1000308800	84.4444	SPAL_0000551000	73.6111
SSTP_0000938000	PC1	0.015	A0A0K0EIS4		AB_hydrolase_3, AB_hydrolase	hydrolase activity	F16F9.4	29.0816	SRAE_2000494400	81.1225	SPAL_0001716500	65.5612	SVE_0373700	71.4286
SSTP_0001136300	PC1	0.015	A0A0K0EPH9		DB	NA	R57.2	49.1329	SRAE_1000199200	89.0173	SPAL_0001586400	86.1272	SVE_0991500	84.9711
SSTP_0000678800	PC1	0.015	A0A0K0EBB7		NA	membrane, integral component of membrane	F54E4.3	42.5455	SRAE_X000100000	92.7273	SPAL_0000688400	84.7273	SVE_0217100	89.8182
SSTP_0000859700	PC1	0.015	A0A0K0EGI5		CSP_DNA-bd, CSD, NA-bd_OB-fold, CSD_1	nucleic acid binding			SRAE_X000040300	77.6471	SPAL_0000005600	26.2745
SSTP_0000293800	PC1	0.015	A0A0K0E0C4		NA	NA			SRAE_1000024900	47.2973	SPAL_0000665200	47.973	SVE_0321000	54.0541
SSTP_0000533400	PC1	0.015	A0A0K0E758		NA	NA			SRAE_X000249500	79.8595	SPAL_0001344700	73.7705	SVE_0890300	72.5995
SSTP_0000077200	PC1	0.015	A0A0K0DU58		NA	NA							SVE_1583200	49.2308
SSTP_0000848800	PC1	0.015	A0A0K0EG78		NA	NA			SRAE_X000205100	69.4167	SPAL_0001309400	55.1667	SVE_0360200	54.6667
SSTP_0001261200	PC1	0.015	A0A0K0ET36		2pore_dom_K_chnl, K_chnl_dom	potassium ion transmembrane transport, potassium channel activity, membrane, integral component of membrane, ion transport	twk-42	34.5361	SRAE_1000018800	72.6804	SPAL_0001526500	61.8557	SVE_0008700	66.7526
SSTP_0001090500	PC1	0.015	A0A0K0EN68		EGF-like_dom, EGF-like_CS	membrane, integral component of membrane			SRAE_X000032500	85.8238	SPAL_0000577400	87.3563	SVE_1981000	85.0575
SSTP_0000212600	PC1	0.015	A0A0K0DY13		Cyt_P450, Cyt_P450_E_grp-I, Cyt_P450_CS, Cyt_P450_sf	oxidoreductase activity, acting on paired donors, with incorporation or reduction of molecular oxygen, iron ion binding, heme binding, oxidation-reduction process, metal ion binding, oxidoreductase activity, membrane, integral component of membrane, monooxygenase activity	cyp-25A3	25.9191	SRAE_2000415300	72.0588	SPAL_0001203800	73.1618	SVE_1626900	52.5735
SSTP_0001008500	PC1	0.015	A0A0K0EKU2		CRISP-related, CAP_domain, Allrgn_V5/Tpx1_CS, SCP_GAPR1-like, CAP_sf	extracellular region	F09B9.5	7.87879	SRAE_0000045600	18.3838			SVE_0646900	15.1515
SSTP_0000230000	PC1	0.015	A0A0K0DYI4		SMAD_dom_Dwarfin-type, SMAD_FHA_dom_sf, SMAD-like_dom_sf	regulation of transcription, DNA-templated, protein binding, intracellular	C34E11.2	13.3929	SRAE_2000359000	68.8312	SPAL_0001055900	47.3214	SVE_1768500	32.5487
SSTP_0000772800	PC1	0.015	A0A0K0EE14		bHLH_dom, HLH_DNA-bd_sf, TAL-like	protein dimerization activity	hlh-15	55.0459	SRAE_2000104200	96.3303	SPAL_0000999700	91.7431	SVE_1855700	87.156
SSTP_0000998600	PC1	0.015	A0A0K0EKJ2		Transmembrane_26, Fusogen_EFF/AFF	membrane, integral component of membrane			SRAE_2000203900	86.7275	SPAL_0001671900	80.0405	SVE_0602400	82.0669
SSTP_0001177600	PC1	0.015	A0A0K0EQP5		NA	NA			SRAE_0000037500	60.8392	SPAL_0001651500	48.951	SVE_1002200	62.9371
SSTP_0000702200	PC1	0.015	A0A0K0EC08		Nucl-diP-sugar_transferase	NA	ZK455.5	43.5185	SRAE_1000035100	87.3457	SPAL_0000824100	78.7037	SVE_0771900	79.6296
SSTP_0000854200	PC1	0.015	A0A0K0EGD2		GPCR_Rhodpsn, GPCR_Rhodpsn_7TM	G protein-coupled receptor signaling pathway, G protein-coupled receptor activity, integral component of membrane, membrane	npr-31	30.7851			SPAL_0001307200	68.1818	SVE_0358000	78.3058
SSTP_0000346000	PC1	0.015	A0A0K0E1U1	Serpentine receptor class gamma	7TM_GPCR_serpentine_rcpt_Srg	sensory perception of chemical stimulus, transmembrane signaling receptor activity, membrane, integral component of membrane			SRAE_1000032000	78.4	SPAL_0000389200	73.6	SVE_1157700	77.6
SSTP_0000324700	PC1	0.015	A0A0K0E183		Ankyrin_rpt, Ankyrin_rpt-contain_dom, Ankyrin_rpt-contain_sf	protein binding			SRAE_2000404800	13.9535	SPAL_0000496900	15.6977
SSTP_0001230600	PC1	0.015	A0A0K0ES78		GPCR_Rhodpsn_7TM	integral component of membrane, membrane			SRAE_X000135400	90.0369	SPAL_0001453200	80.4428	SVE_0903800	80.4428
SSTP_0000284400	PC1	0.015	A0A0K0E027		K_chnl_volt-dep_KCNQ, Ion_trans_dom, K_chnl_volt-dep_KCNQ_C, VG_K_chnl	voltage-gated potassium channel complex, potassium ion transport, voltage-gated potassium channel activity, ion transport, ion channel activity, transmembrane transport, membrane, integral component of membrane, potassium channel activity, potassium ion transmembrane transport	kqt-1	45.3089	SRAE_1000241300	82.151	SPAL_0000559400	74.0275	SVE_0033100	79.2906
SSTP_0000214800	PC1	0.014	A0A0K0DY34		Ankyrin_rpt, Ankyrin_rpt-contain_dom, Ankyrin_rpt-contain_sf	protein binding, membrane, integral component of membrane			SRAE_2000417700	71.3983	SPAL_0001160600	62.9237	SVE_1630300	58.8983
SSTP_0000422700	PC1	0.014	A0A0K0E410		Sulfotransferase, Chst-1	positive regulation of response to oxidative stress, chondroitin sulfate biosynthetic process, chondroitin 4-sulfotransferase activity, sulfotransferase activity, integral component of membrane, membrane			SRAE_2000454400	91.5761	SPAL_0000412200	80.4348	SVE_1568500	81.5217
SSTP_0000695600	PC1	0.014	A0A0K0EBT6		NA	NA			SRAE_2000519700	76	SPAL_0000876000	57.3333	SVE_0729200	60.6667
SSTP_0000109000	PC1	0.014	A0A0K0DV23		NA	membrane, integral component of membrane
SSTP_0000829700	PC1	0.014	A0A0K0EFN7		NA	NA			SRAE_X000130100	56.1116	SPAL_0000499800	26.2753
SSTP_0001210200	PC1	0.014	A0A0K0ERM2		ShKT_dom	NA	F41G3.19	22.028	SRAE_2000474600	62.9371	SPAL_0000366400	61.5385	SVE_0091700	61.8881
SSTP_0000449400	PC1	0.014	A0A0K0E4S4		2pore_dom_K_chnl, K_chnl_dom	potassium ion transmembrane transport, potassium channel activity, membrane, integral component of membrane, ion transport	egl-23	34.174	SRAE_X000058300	64.691	SPAL_0000041800	50.5675	SVE_0222800	56.7465
SSTP_0000374600	PC1	0.014	A0A0K0E2M7		GABAA/Glycine_rcpt, Neurotrans-gated_channel_TM, Neur_channel, Neur_chan_lig-bd, Glu_Cl_Channel, Neurotransmitter_ion_chnl_CS, Neuro-gated_channel_TM_sf, Neur_chan_lig-bd_sf	extracellular ligand-gated ion channel activity, ion transmembrane transport, ion transport, ion channel activity, transmembrane signaling receptor activity, integral component of membrane, membrane, plasma membrane	glc-2	59.854	SRAE_2000275800	96.837	SPAL_0001033400	98.0535	SVE_0490900	98.2968
SSTP_0001265200	PC1	0.014	A0A0K0ET75		NA	NA	lon-8	79.1139	SRAE_1000051900	94.9367	SPAL_0000177800	94.3038	SVE_0071000	89.8734
SSTP_0001227900	PC1	0.014	A0A0K0ES51		PTPase_domain, Dual-sp_phosphatase_cat-dom, TYR_PHOSPHATASE_dom, Tyr_Pase_cat, Tyr_Pase_AS, TYR_PHOSPHATASE_DUAL_dom, Prot-tyrosine_phosphatase-like	protein dephosphorylation, protein tyrosine phosphatase activity, dephosphorylation, protein tyrosine/serine/threonine phosphatase activity, phosphatase activity, hydrolase activity, peptidyl-tyrosine dephosphorylation, phosphoprotein phosphatase activity	T12B3.1	24.838	SRAE_X000230700	81.2095	SPAL_0001115400	70.8423	SVE_0111100	69.9784
SSTP_0000439800	PC1	0.014	A0A0K0E4H8		GABAA/Glycine_rcpt, Neurotrans-gated_channel_TM, Neur_channel, Neur_chan_lig-bd, Neurotransmitter_ion_chnl_CS, Neuro-gated_channel_TM_sf, Neur_chan_lig-bd_sf	extracellular ligand-gated ion channel activity, ion transmembrane transport, ion transport, ion channel activity, transmembrane signaling receptor activity, integral component of membrane, membrane, plasma membrane	ggr-3	36.8914			SPAL_0001439500	73.4082	SVE_1984400	36.3296
SSTP_0000774800	PC1	0.014	A0A0K0EE36		NA	membrane, integral component of membrane			SRAE_0000004200	90.9091	SPAL_0001377500	89.7233	SVE_0569900	84.9802
SSTP_0001157800	PC1	0.014	A0A0K0EQ49		NA	NA			SRAE_1000042800	64.4737	SPAL_0001098350	53.9474	SVE_0088600	51.3158
SSTP_0000424800	PC1	0.014	A0A0K0E430		SaposinB_dom, Saposin-like	NA			SRAE_2000447300	79.6992	SPAL_0000124700	78.1955	SVE_0350000	79.6992
SSTP_0000200700	PC1	0.014	A0A0K0DXP3		IFT81, IFT81_CH	intraciliary transport particle B, intraciliary transport, tubulin binding, cilium assembly, cilium	ift-81	32.64	SRAE_2000517800	86.88	SPAL_0001747100	73.44	SVE_0348100	72.64
SSTP_0000321700	PC1	0.014	A0A0K0E155	Phosphate transporter	Phos_transporter	phosphate ion transport, inorganic phosphate transmembrane transporter activity, membrane, integral component of membrane, transmembrane transport	pitr-5	52.449	SRAE_1000007700	90.8163	SPAL_0001181500	83.8775	SVE_0326900	83.4694
SSTP_0000515500	PC1	0.014	A0A0K0E6M6		Homeobox_dom, Homeobox-like_sf, Homeobox_CS, CVC	sequence-specific DNA binding, regulation of transcription, DNA-templated, DNA binding, nucleus	ceh-10	33.1633	SRAE_2000198000	91.8367	SPAL_0001038900	88.5204	SVE_0549800	88.0102
SSTP_0000954600	PC1	0.014	A0A0K0EJ97		WAP_dom	extracellular region, peptidase inhibitor activity, negative regulation of peptidase activity			SRAE_2000509000	86.2637
SSTP_0000084900	PC1	0.014	A0A0K0DUD6		NA	NA			SRAE_2000396400	72.9508	SPAL_0000434400	63.1148	SVE_0284700	65.847
SSTP_0000377500	PC1	0.014	A0A0K0E2Q6		Globin-like_sf, Globin/Proto	oxygen binding, heme binding	glb-22	35.5049	SRAE_2000406300	91.2052	SPAL_0001318100	87.6221	SVE_1196700	80.1303
SSTP_0000412900	PC1	0.014	A0A0K0E3Q8		NA	membrane, integral component of membrane	AH9.6	28.2132	SRAE_2000350400	82.7586	SPAL_0000462300	80.8777	SVE_1753600	80.2508
SSTP_0001248500	PC1	0.014	A0A0K0ESQ6		SDR_fam, NAD(P)-bd_dom_sf	NA			SRAE_X000116200	83.0882			SVE_0714800	71.6912
SSTP_0000665300	PC1	-0.014	A0A0K0EAX8		NA	NA					SPAL_0001129300	2.72873
SSTP_0000342100	PC1	-0.014	A0A0K0E1Q3		BTB/POZ_dom, Kelch_1, SKP1/BTB/POZ_sf, BACK, Kelch-typ_b-propeller, BTB-kelch_protein	protein binding
SSTP_0000987000	PC1	-0.014	A0A0K0EK76		NA	NA
SSTP_0000939100	PC1	-0.014	A0A0K0EIT5		RNA-helicase_DEAD-box_CS, Helicase_C, DEAD/DEAH_box_helicase_dom, Helicase_ATP-bd, RNA_helicase_DEAD_Q_motif, P-loop_NTPase	nucleic acid binding, ATP binding	glh-2	24.0893	SRAE_2000216700	66.3925	SPAL_0001718100	64.3948	SVE_0375500	66.98
SSTP_0000833700	PC1	-0.014	A0A0K0EFS7	Metalloendopeptidase	Peptidase_M12A, Peptidase_Metallo, MetalloPept_cat_dom_sf	metalloendopeptidase activity, metallopeptidase activity, proteolysis, zinc ion binding, metal ion binding, hydrolase activity, membrane, integral component of membrane, peptidase activity			SRAE_X000146700	47.9905	SPAL_0000929100	34.5154
SSTP_0000010600	PC1	-0.014	A0A0K0DS97		RNA-dep_RNA_pol_euk-typ	RNA-directed 5'-3' RNA polymerase activity, transcription, RNA-templated	rrf-2	27.7139	SRAE_2000026400	75.9898	SPAL_0001017300	74.0741	SVE_0507500	74.0741
SSTP_0001039200	PC1	-0.014	A0A0K0ELQ1		CRISP-related, CAP_domain, CAP_sf	NA			SRAE_2000130200	43.8247
SSTP_0000651000	PC1	-0.014	A0A0K0EAI6	Importin subunit alpha	Armadillo, Importin-a_IBB, ARM-like, ARM-type_fold, Importing_su_alpha, Arm_3, Importin-a_IBB_sf	nuclear import signal receptor activity, protein import into nucleus, protein transporter activity, cytoplasm, protein binding, nucleus, protein transport	ima-2	43.3712	SRAE_2000258500	81.25	SPAL_0000234200	79.3561	SVE_0475100	79.3561
SSTP_0000805700	PC1	-0.014	A0A0K0EEZ3		NA	NA			SRAE_2000071210	52.2822	SPAL_0000810300	46.473	SVE_0805700	46.473
SSTP_0000923900	PC1	-0.014	A0A0K0EID3	Kinesin-like protein	Kinesin_motor_dom, Kinesin_motor_CS, P-loop_NTPase, Kinesin-like_fam, Kinesin_motor_dom_sf	microtubule-based movement, microtubule motor activity, microtubule binding, ATP binding, nucleotide binding, microtubule, motor activity	bmk-1	26.9727	SRAE_1000149000	53.5151	SPAL_0001575600	45.7676	SVE_0980100	44.0459
SSTP_0000575100	PC1	-0.014	A0A0K0E8C0		Znf_RING, Znf_RING/FYVE/PHD	NA			SRAE_1000329200	58.6433	SPAL_0000456000	49.453
SSTP_0000182000	PC1	-0.014	A0A0K0DX53		RAI1-like_fam	NA					SPAL_0001639700	61.8768	SVE_0427200	61.5836
SSTP_0001044300	PC1	-0.014	A0A0K0ELV5		TPR-like_helical_dom_sf, TPR-contain_dom, TPR_2, TPR_repeat, Ctr9	histone modification, regulation of transcription, DNA-templated, protein binding	ctr-9	25.794	SRAE_1000092600	74.6872	SPAL_0000704600	51.0106	SVE_0203300	62.3677
SSTP_0000369100	PC1	-0.015	A0A0K0E2H1		Cyclin-like_sf	NA			SRAE_2000172800	80.4795	SPAL_0001626400	68.8356	SVE_0440400	68.4931
SSTP_0000585100	PC1	-0.015	A0A0K0E8L9	Serine/threonine-protein phosphatase	Calcineurin-like_PHP_ApaH, Ser/Thr-sp_prot-phosphatase, Metallo-depent_PP-like	hydrolase activity, phosphoprotein phosphatase activity, protein dephosphorylation	F23B12.1	44.058	SRAE_1000133500	60	SPAL_0001086200	77.971	SVE_0954400	77.6812
SSTP_0000488300	PC1	-0.015	A0A0K0E5U9		NA	NA
SSTP_0000828700	PC1	-0.015	A0A0K0EFM6		NA	membrane, integral component of membrane			SRAE_0000057900	27.2059
SSTP_000217000	PC1	-0.015	A0A0K0ETS8		CUB_dom, Peptidase_M12A, EGF-like_CS, MetalloPept_cat_dom_sf, Sperma_CUB_dom_sf	metalloendopeptidase activity, metallopeptidase activity, proteolysis, membrane, integral component of membrane			SRAE_2000420000	55.5556
SSTP_0001211200	PC1	-0.015	A0A0K0ERN2		NA	NA
SSTP_0000991200	PC1	-0.015	A0A0K0EKB8		NA	membrane, integral component of membrane
SSTP_0000821100	PC1	-0.015	A0A0K0EFE8		RNA-dep_RNA_pol_euk-typ	RNA-directed 5'-3' RNA polymerase activity, transcription, RNA-templated	ego-1	26.1981	SRAE_1000097100	72.0767	SPAL_0001386500	47.476	SVE_0276300	47.5399
SSTP_0000720800	PC1	-0.015	A0A0K0ECJ3		RNA-helicase_DEAD-box_CS, Helicase_C, DEAD/DEAH_box_helicase_dom, Helicase_ATP-bd, RNA_helicase_DEAD_Q_motif, P-loop_NTPase	nucleic acid binding, ATP binding, nucleotide binding, hydrolase activity, helicase activity					SPAL_0001039700	58.8889
SSTP_0001149900	PC1	-0.015	A0A0K0EPX0	Metalloendopeptidase	Peptidase_M12A, Peptidase_Metallo, MetalloPept_cat_dom_sf, Sperma_CUB_dom_sf	metalloendopeptidase activity, metallopeptidase activity, proteolysis, zinc ion binding, metal ion binding, hydrolase activity, membrane, integral component of membrane, peptidase activity	nas-31	23.7089	SRAE_X000145900	46.2441			SVE_0893600	39.2019
SSTP_0000637900	PC1	-0.015	A0A0K0EA52		His_Pase_clade-2, His_PPase_superfam, Acid_Pase_AS	NA	pho-7	27.5325	SRAE_X000043200	64.1558
SSTP_0000252700	PC1	-0.015	A0A0K0DZ63		SNF2_N, Helicase_C, Helicase_ATP-bd, P-loop_NTPase, SNF2-like_sf	ATP binding	rad-54	55.9432	SRAE_2000083000	81.7829	SPAL_0000776800	86.0465	SVE_0420800	84.1085
SSTP_0000487600	PC1	-0.015	A0A0K0E5U2		NA	NA
SSTP_0001010600	PC1	-0.015	A0A0K0EKW3		NA	NA			SRAE_2000090100	82.8854	SPAL_0000787900	78.6422	SVE_1837300	78.5007
SSTP_0001076800	PC1	-0.015	A0A0K0EMS7		Endo/exonu/phosph_ase_sf	NA
SSTP_0000304200	PC1	-0.015	A0A0K0E0N0		PTPase_domain, TYR_PHOSPHATASE_dom, Tyr_Pase_cat, Tyr_Pase_AS, Prot-tyrosine_phosphatase-like	protein dephosphorylation, protein tyrosine phosphatase activity, dephosphorylation, phosphatase activity, hydrolase activity, membrane, integral component of membrane, peptidyl-tyrosine dephosphorylation, phosphoprotein phosphatase activity	Y113G7C.1	10.8919	SRAE_2000267000	37.0497	SPAL_0001110300	33.1904	SVE_1912800	33.7907
SSTP_0000674200	PC1	-0.015	A0A0K0EB71		NA	NA
SSTP_0000370700	PC1	-0.015	A0A0K0E2I9		NA	NA			SRAE_2000187300	65.1803	SPAL_0000539400	11.1954	SVE_0080600	12.8083
SSTP_0001265700	PC1	-0.015	A0A0K0ET80		Znf_CCCH, Znf_CCCH_sf	metal ion binding	mex-1	11.4345	SRAE_1000051400	52.8067	SPAL_0000177300	44.2827	SVE_0070500	29.9376
SSTP_0000390800	PC1	-0.015	A0A0K0E337		NA	NA
SSTP_0000517800	PC1	-0.015	A0A0K0E6P9		CRISP-related, CAP_domain, CAP_sf	NA	F09B9.5	12.8114	SRAE_2000077400	33.8078
SSTP_0000780500	PC1	-0.015	A0A0K0EE93		Cyclin_C-dom, Cyclin_N, Cyclin-like, Cyclin_B3, Cyclin-like_sf, Cyclin	regulation of G2/M transition of mitotic cell cycle, regulation of cyclin-dependent protein serine/threonine kinase activity, protein kinase binding, nucleus	cyb-3	33.8462	SRAE_2000374400	73.5897	SPAL_0001742500	79.4872	SVE_0562000	83.8462
SSTP_0000816200	PC1	-0.015	A0A0K0EF99		Chitin-bd_dom, Chitin-bd_dom_sf	chitin metabolic process, extracellular region, chitin binding	ule-1	5.82857
SSTP_0000440900	PC1	-0.015	A0A0K0E4I9		NA	NA
SSTP_0000868200	PC1	-0.015	A0A0K0EGS1	Metalloendopeptidase	Peptidase_M12A, Peptidase_Metallo, MetalloPept_cat_dom_sf	metalloendopeptidase activity, metallopeptidase activity, proteolysis, zinc ion binding, metal ion binding, hydrolase activity, membrane, integral component of membrane, peptidase activity			Sra-stal-1	54.8926	SPAL_0000587600	33.8902	SVE_0373400	33.8902
SSTP_0001221700	PC1	-0.015	A0A0K0ERY7		NA	NA			SRAE_X000014700	58.6538
SSTP_0000482900	PC1	-0.015	A0A0K0E5P1		NA	NA
SSTP_0001131900	PC1	-0.015	A0A0K0EPD5		ShKT_dom, Haem_peroxidase_sf, Haem_peroxidase_animal, Haem_peroxidase_sf_animal	response to oxidative stress, heme binding, peroxidase activity, oxidation-reduction process, cellular oxidant detoxification			SRAE_X000179100	78.2477
SSTP_0001128300	PC1	-0.015	A0A0K0EP97		NA	NA
SSTP_0000667500	PC1	-0.015	A0A0K0EB04		NA	NA
SSTP_0000057900	PC1	-0.015	A0A0K0DTL7		Fork_head_dom, TF_fork_head_CS_2, FOXP-CC, WH-like_DNA-bd_sf, WH_DNA-bd_sf	sequence-specific DNA binding, DNA-binding transcription factor activity, regulation of transcription, DNA-templated, nucleus, DNA binding			SRAE_2000141900	45.8591	SPAL_0001702900	46.6007	SVE_1908700	32.8801
SSTP_0001115400	PC1	-0.015	A0A0K0ENW7	Metalloendopeptidase	CUB_dom, Peptidase_M12A, EGF-like_CS, MetalloPept_cat_dom_sf, Sperma_CUB_dom_sf	metalloendopeptidase activity, metallopeptidase activity, proteolysis, metal ion binding, hydrolase activity, peptidase activity	hch-1	23.6145
SSTP_0000026900	PC1	-0.015	A0A0K0DSQ6		Znf_RING, Znf_RING/FYVE/PHD	NA			SRAE_1000342000	70.977	SPAL_0000269400	57.7586	SVE_1897100	56.6092
SSTP_0000057000	PC1	-0.015	A0A0K0DTK8		PH_domain, PH-like_dom_sf, AHD, PH_Anillin	NA			SRAE_2000122000	44.9026	SPAL_0000572400	39.748	SVE_0405200	60.252
SSTP_0000777400	PC1	-0.015	A0A0K0EE62		NA	NA			SRAE_2000377400	83.7766	SPAL_0001382000	77.3936	SVE_0565100	77.1277
SSTP_0000381600	PC1	-0.015	A0A0K0E2U7		Kelch_1, Gal_Oxase/kelch_b-propeller, Kelch-typ_b-propeller	protein binding			SRAE_0000007500	77.8409	SPAL_0000190000	41.8561	SVE_0062600	45.6439
SSTP_0001149600	PC1	-0.015	A0A0K0EPW5		NA	NA
SSTP_0001039500	PC1	-0.015			NA	NA
SSTP_0000679000	PC1	-0.015	A0A0K0EBB9		NA	membrane, integral component of membrane			SRAE_X000089400	49.4949	SPAL_0001662500	52.5253	SVE_0127500	50.5051
SSTP_0000988900	PC1	-0.015			NA	NA	wago-4	25.1553	SRAE_1000045200	69.4617	SPAL_0001641000	61.6977	SVE_0402500	62.2153
SSTP_0000037300	PC1	-0.015	A0A0K0DT12		NA	NA
SSTP_0000674800	PC1	-0.015	A0A0K0EB77	Transcription elongation factor SPT4	Spt4, Spt4/RpoE2_Znf, RPABC4/Spt4, Spt4_sf	positive regulation of DNA-templated transcription, elongation, regulation of transcription, DNA-templated, nucleus, zinc ion binding	spt-4	40.3226	SRAE_X000014100	79.8387	SPAL_0000307400	72.5806	SVE_1592900	71.7742
SSTP_0000397600	PC1	-0.015	A0A0K0E3A4		NA	NA			SRAE_2000237900	54.6906	SPAL_0001197900	32.7345	SVE_0388100	33.9321
SSTP_0001018900	PC1	-0.015	A0A0K0EL45		CRISP-related, CAP_domain, CAP_sf	NA			SRAE_2000527200	45.8746	SPAL_0000870000	23.7624	SVE_0899000	37.6238
SSTP_0001126100	PC1	-0.015	A0A0K0EP74	Metalloendopeptidase	Peptidase_M12A, Peptidase_Metallo, MetalloPept_cat_dom_sf	metalloendopeptidase activity, metallopeptidase activity, proteolysis, zinc ion binding, metal ion binding, hydrolase activity, membrane, integral component of membrane, peptidase activity			Sra-stal-1	56.5947	SPAL_0000587600	37.8897	SVE_0373400	36.211
SSTP_0000676700	PC1	-0.015	A0A0K0EB95	Kinesin-like protein	Kinesin_motor_dom, Kinesin_motor_CS, P-loop_NTPase, Kinesin-like_fam, Kinesin_motor_dom_sf	microtubule-based movement, microtubule motor activity, microtubule binding, ATP binding, nucleotide binding, microtubule, motor activity	klp-13	36.3309	SRAE_X000220700	71.5827	SPAL_0000661000	66.4269	SVE_0846100	68.5851
SSTP_0000538800	PC1	-0.015	A0A0K0E7B2		NA	membrane, integral component of membrane			SRAE_2000460700	36.1779
SSTP_0000552600	PC1	-0.015	A0A0K0E7Q1		Inner_centromere_prot_ARK-bd, INCENP	regulation of mitotic cytokinesis, mitotic sister chromatid segregation			SRAE_1000084000	29.1439	SPAL_0000611100	49.5446	SVE_0401300	49.9089
SSTP_0000901600	PC1	-0.015	A0A0K0EHR2		Znf_C2H2_sf	NA			SRAE_1000228100	49.5868	SPAL_0001243000	43.8017	SVE_0693300	37.1901
SSTP_0000512800	PC1	-0.015	A0A0K0E6J9		CRISP-related, CAP_domain, Allrgn_V5/Tpx1_CS, SCP_GAPR1-like, CAP_sf	extracellular region	scl-13	16.0714	SRAE_2000070500	55.7143	SPAL_0001714900	36.4286	SVE_1867100	26.4286
SSTP_0000048200	PC1	-0.015			NA	NA	ekl-4	13.6531	SRAE_2000328000	79.6125	SPAL_0000213200	38.8376	SVE_1730000	35.6089
SSTP_0001108700	PC1	-0.015	A0A0K0ENQ0		Peptidase_S9, Peptidase_S9A, Pept_S9_AS, Pept_S9A_N, AB_hydrolase	serine-type exopeptidase activity, serine-type peptidase activity, serine-type endopeptidase activity, proteolysis			SRAE_2000461510	59.2068			SVE_0370900	38.5269
SSTP_0000409600	PC1	-0.015	A0A0K0E3M4		RLR_CTR, P-loop_NTPase, RLR_C_sf	NA			SRAE_2000346900	46.779	SPAL_0000212100	81.5659	SVE_1750300	81.4668
SSTP_0000391000	PC1	-0.015	A0A0K0E339		MetalloPept_cat_dom_sf	metallopeptidase activity, proteolysis			SRAE_2000071900	30.0254	SPAL_0001106000	14.2494	SVE_1208700	19.084
SSTP_0000957100	PC1	-0.015	A0A0K0EJC5		His_Pase_clade-2, His_PPase_superfam, Acid_Pase_AS	NA			SRAE_0000001200	60.75	SPAL_0001749700	50.75	SVE_1103500	46.75
SSTP_0000808100	PC1	-0.015	A0A0K0EF17	Serine/threonine-protein kinase PLK	Prot_kinase_dom, POLO_box_dom, Ser/Thr_kinase_AS, Kinase-like_dom_sf, Protein_kinase_ATP_BS, POLO_box_2, POLO_box_1, POLO_box_dom_sf	protein binding, protein phosphorylation, protein kinase activity, ATP binding, nucleotide binding, kinase activity, phosphorylation, transferase activity, protein serine/threonine kinase activity	plk-2	51.3652	SRAE_2000130600	82.2526	SPAL_0000813200	72.8669	SVE_1878300	76.6212
SSTP_0000863500	PC1	-0.015	A0A0K0EGM4		NA	NA			SRAE_0000069800	17.6375
SSTP_0000308600	PC1	-0.015	A0A0K0E0S4		NA	NA			SRAE_1000194600	73.7255	SPAL_0000159500	72.1569	SVE_1011100	71.7647
SSTP_0000932400	PC1	-0.015	A0A0K0EIL8		ShKT_dom	NA			SRAE_1000157350	33.3333	SPAL_0000747800	35.9477	SVE_1017300	37.9085
SSTP_0001133100	PC1	-0.015	A0A0K0EPE7		NA	NA
SSTP_0001018800	PC1	-0.015	A0A0K0EL44		CAP_domain, CAP_sf	NA			SRAE_2000527400	49.2308	SPAL_0000870000	27.1795	SVE_0899000	27.6923
SSTP_0000579700	PC1	-0.015	A0A0K0E8G6		Znf_Sec23_Sec24, Sec23/24_trunk_dom, Sec23/24_helical_dom, Gelsolin-like_dom, Sec23_24_beta_S, ADF-H/Gelsolin-like_dom_sf, Znf_Sec23_Sec24_sf, Sec23/24_helical_dom_sf, Gelsolin-like_dom_sf, vWFA_dom_sf	COPII vesicle coat, endoplasmic reticulum to Golgi vesicle-mediated transport, intracellular protein transport, zinc ion binding, protein transport	sec-24.1	39.876	SRAE_1000190400	69.4215	SPAL_0001588500	56.405	SVE_0993700	55.1653
SSTP_0000321000	PC1	-0.015	A0A0K0E148		NA	NA			SRAE_1000008400	39.7015	SPAL_0000104700	28.0597	SVE_0326100	25.9701
SSTP_0000482500	PC1	-0.015	A0A0K0E5N7		CAP_sf	NA			SRAE_2000124500	23.7785
SSTP_0000527300	PC1	-0.015	A0A0K0E6Z9		NA	NA			SRAE_1000043500	62.0401	SPAL_0000175700	54.8495	SVE_1700400	35.4515
SSTP_0000959500	PC1	-0.015	A0A0K0EJE9		NA	NA
SSTP_0000169500	PC1	-0.015	A0A0K0DWS9		NA	NA			SRAE_2000252900	50.5695	SPAL_0000991300	53.5308	SVE_0469400	57.1754
SSTP_0000447200	PC1	-0.015	A0A0K0E4Q2		3'-5'_exonuclease_dom, RNaseH-like_sf, RNaseH_sf	3'-5' exonuclease activity, nucleobase-containing compound metabolic process, nucleic acid binding, nucleic acid phosphodiester bond hydrolysis			SRAE_1000030200	61.9529	SPAL_0001021200	30.9764	SVE_0503500	60.9428
SSTP_0000639700	PC1	-0.015	A0A0K0EA69	Hyaluronidase	Aldolase_TIM, Glycoside_hydrolase_SF, Hyaluronidase	hyalurononglucosaminidase activity, carbohydrate metabolic process, catalytic activity, metabolic process, hydrolase activity, hydrolase activity, acting on glycosyl bonds	chhy-1	27.0732	SRAE_X000016500	41.9512	SPAL_0001184900	37.8049
SSTP_0000509000	PC1	-0.015	A0A0K0E6F9		NA	NA
SSTP_0001053500	PC1	-0.015	A0A0K0EM47		CAP_sf	NA			SRAE_2000124500	24.8387
SSTP_0000106400	PC1	-0.015	A0A0K0DUZ8		NA	NA			SRAE_2000217900	72.103	SPAL_0001396400	58.3691	SVE_1827100	59.6567
SSTP_0001197900	PC1	-0.015	A0A0K0ER94		Chromatin_SPT2	NA					SPAL_0001096100	46.8085	SVE_0086300	47.7204
SSTP_0001077200	PC1	-0.015	A0A0K0EMT4		NA	NA
SSTP_0001128400	PC1	-0.015	A0A0K0EMT4		NA	NA
SSTP_0000722400	PC1	-0.015	A0A0K0ECK9	Hyaluronidase	Aldolase_TIM, Glycoside_hydrolase_SF, Hyaluronidase	hyalurononglucosaminidase activity, carbohydrate metabolic process, catalytic activity, metabolic process, hydrolase activity, hydrolase activity, acting on glycosyl bonds	chhy-1	32.6816	SRAE_2000096800	79.8883	SPAL_0000207000	62.0112	SVE_0449200	75.6983
SSTP_0000601200	PC1	-0.015	A0A0K0E928		Znf_RING, Znf_RING/FYVE/PHD, Znf_RING_CS	NA
SSTP_0001197000	PC1	-0.016	A0A0K0ER85		NA	NA					SPAL_0001096800	3.64742	SVE_0087000	56.8389
SSTP_0000537100	PC1	-0.016	A0A0K0E795	Zinc metalloproteinase	CUB_dom, Peptidase_M12A, Peptidase_Metallo, Metallopeptidase_nem, MetalloPept_cat_dom_sf, Astacin-like_dom, Sperma_CUB_dom_sf	molting cycle, collagen and cuticulin-based cuticle, metalloendopeptidase activity, metallopeptidase activity, proteolysis, zinc ion binding, metal ion binding, hydrolase activity, membrane, integral component of membrane, peptidase activity, extracellular region
SSTP_0001063000	PC1	-0.016	A0A0K0EME2		AMP-dep_Synth/Lig, AMP-dep_Synthh-like_sf	catalytic activity	acs-17	43.8187	SRAE_X000163600	75.2747	SPAL_0001542300	69.7802	SVE_0260700	72.1154
SSTP_0001147900	PC1	-0.016	A0A0K0EPU7		NA	NA			SRAE_2000124400	22.5131
SSTP_0000453800	PC1	-0.016	A0A0K0E4W9		CRISP-related, CAP_domain, CAP_sf	NA			SRAE_2000130200	36.9186
SSTP_0000305700	PC1	-0.016	A0A0K0E0P5	Innexin	Innexin	membrane, integral component of membrane, ion transport, plasma membrane, gap junction, cell junction			SRAE_0000042100	87.6494	SPAL_0001646500	88.0478	SVE_1007100	87.0518
SSTP_0000787700	PC1	-0.016	A0A0K0EEG6		PAZ_dom, Piwi, RNaseH-like_sf, ArgoL1, ArgoL2, Argonaute_N, PAZ_dom_sf, RNaseH_sf	protein binding, nucleic acid binding, gene silencing by RNA	alg-4	43.2287	SRAE_2000036100	74.5291	SPAL_0001424200	82.3318	SVE_0539400	86.278
SSTP_0000321200	PC1	-0.016	A0A0K0E150		Homeobox_dom, Homeobox-like_sf, SATB1/SATB2	chromatin remodeling, DNA binding, nucleus			SRAE_1000008200	64.3275	SPAL_0000104600	23.6842	SVE_0326000	22.2222
SSTP_0000620500	PC1	-0.016	A0A0K0E9M3		NA	NA
SSTP_0000989000	PC1	-0.016	A0A0K0EK96		NA	NA			SRAE_1000096100	27.866	SPAL_0000245900	26.6314	SVE_1096200	8.99471
SSTP_0001181200	PC1	-0.016	A0A0K0EQT1		NA	NA			SRAE_1000255300	48.8571	SPAL_0000864100	32.2857	SVE_1044200	31.1429
SSTP_0000560600	PC1	-0.016	A0A0K0E7X7		NA	NA			SRAE_1000271400	62.2881	SPAL_0001658600	51.6949	SVE_1940800	50.4237
SSTP_0000648400	PC1	-0.016	A0A0K0EAG0		NA	membrane, integral component of membrane
SSTP_0000100500	PC1	-0.016	A0A0K0DUT7		NA	NA
SSTP_0001149700	PC1	-0.016	A0A0K0EPW6		TIL_dom, Ser_inhib-like_sf	membrane, integral component of membrane			SRAE_2000522500	16.5541	SPAL_0000413700	20.2703	SVE_0703100	16.2162
SSTP_0000169100	PC1	-0.016	A0A0K0DWS5		P-loop_NTPase	NA	rad-50	26.5823					SVE_0469800	66.0338
SSTP_0000138500	PC1	-0.016	A0A0K0DVW9		MFS, MFS_dom, MFS_trans_sf	transmembrane transport, integral component of membrane, membrane	T28C12.2	33.871	SRAE_2000152100	91.2442	SPAL_0000095100	79.2627	SVE_0384000	77.4194
SSTP_0001095700	PC1	-0.016	A0A0K0ENC0		NA	membrane, integral component of membrane			SRAE_X000051200	19.797
SSTP_0000317900	PC1	-0.016	A0A0K0E117		DEAD/DEAH_box_helicase_dom, P-loop_NTPase	nucleic acid binding, ATP binding			SRAE_1000121200	57.7869	SPAL_0000630300	61.0656	SVE_0012200	60.6557
SSTP_0001073300	PC1	-0.016	A0A0K0EMP2		NA	NA
SSTP_0000643750	PC1	-0.016	A0A0K0EAB2		NA	NA
SSTP_0000560500	PC1	-0.016	A0A0K0E7X6		PTPase_domain, TYR_PHOSPHATASE_dom, Tyr_Pase_cat, Tyr_Pase_AS, Prot-tyrosine_phosphatase-like	protein dephosphorylation, protein tyrosine phosphatase activity, dephosphorylation, phosphatase activity, hydrolase activity, peptidyl-tyrosine dephosphorylation, phosphoprotein phosphatase activity					SPAL_0001658500	66.1765	SVE_1940900	66.6667
SSTP_0000115400	PC1	-0.016	A0A0K0DV88	Zinc metalloproteinase	Peptidase_M12A, OTU_dom, Peptidase_Metallo, EGF-like_CS, Metallopeptidase_nem, MetalloPept_cat_dom_sf, Astacin-like_dom, Sperma_CUB_dom_sf	molting cycle, collagen and cuticulin-based cuticle, metalloendopeptidase activity, metallopeptidase activity, proteolysis, zinc ion binding, metal ion binding, hydrolase activity, peptidase activity, extracellular region							SVE_0826300	44.6524
SSTP_0000664400	PC1	-0.016	A0A0K0EAW9		Aldo/ket_reductase_CS, Aldo/keto_reductase, NADP_OxRdtase_dom, NADP_OxRdtase_dom_sf	oxidation-reduction process, oxidoreductase activity	C56G3.2	14.377	SRAE_2000432000	83.7061	SPAL_0000943900	77.3163	SVE_0374100	68.0511
SSTP_0000345100	PC1	-0.016	A0A0K0E1T2		Helicase_C, DNA/RNA_helicase_DEAH_CS, Helicase-assoc_dom, DEAD/DEAH_box_helicase_dom, Helicase_ATP-bd, P-loop_NTPase	helicase activity, nucleic acid binding, ATP binding, nucleotide binding, hydrolase activity	rha-1	27.3276	SRAE_1000042400	81.0345	SPAL_0000726500	77.6724	SVE_0355900	67.6724
SSTP_0000509100	PC1	-0.016	A0A0K0E6G0		NA	NA
SSTP_0000834000	PC1	-0.016	A0A0K0EFT3		NA	NA			SRAE_1000325400	66.7257	SPAL_0000700500	11.6814	SVE_1094600	11.5044
SSTP_0000684700	PC1	-0.016	A0A0K0EBH6		NA	membrane, integral component of membrane
SSTP_0000245000	PC1	-0.016	A0A0K0DYY4		NA	NA			SRAE_X000023200	35.9712
SSTP_0000441400	PC1	-0.016	A0A0K0E4J4		NA	NA			SRAE_2000515500	26.958	SPAL_0001169400	20.7749	SVE_0237300	33.5532
SSTP_0000830900	PC1	-0.016	A0A0K0EFP9		Cpg-3	NA			SRAE_1000350900	30.1426	SPAL_0000272100	30.1426	SVE_1894300	28.9206
SSTP_0001186000	PC1	-0.016	A0A0K0EQX9		TIL_dom, Ser_inhib-like_sf	NA			SRAE_1000260300	57.8571	SPAL_0000171400	55.7143
SSTP_0000332400	PC1	-0.016	A0A0K0E1F6		AA_transpt_TM	membrane, integral component of membrane	slc-36.2	60.1064	SRAE_2000322800	92.5532	SPAL_0000283800	91.4894	SVE_1616800	89.8936
SSTP_0000803900	PC1	-0.016	A0A0K0EEX5		NA	membrane, integral component of membrane
SSTP_0000967000	PC1	-0.016	A0A0K0EJM9	Zinc metalloproteinase	CUB_dom, Peptidase_M12A, Peptidase_Metallo, EGF-like_CS, Metallopeptidase_nem, MetalloPept_cat_dom_sf, Astacin-like_dom, Sperma_CUB_dom_sf	molting cycle, collagen and cuticulin-based cuticle, metalloendopeptidase activity, metallopeptidase activity, proteolysis, zinc ion binding, metal ion binding, hydrolase activity, peptidase activity, extracellular region			SRAE_2000073400	44.2455	SPAL_0001230000	43.734
SSTP_0001109900	PC1	-0.016	A0A0K0ENR2		NA	NA			SRAE_2000515500	16.737	SPAL_0001169400	13.3615	SVE_0237300	26.9339
SSTP_0000800400	PC1	-0.016	A0A0K0EEU1		ArfGAP_dom, ARFGAP/RecO, ArfGAP_dom_sf	GTPase activator activity, metal ion binding, positive regulation of GTPase activity			SRAE_2000109900	74.0196	SPAL_0001006000	63.7255	SVE_0519700	61.2745
SSTP_0001150500	PC1	-0.016	A0A0K0EPX6		NA	NA
SSTP_0000575000	PC1	-0.016	A0A0K0E8B9		Znf_RING, Znf_RING/FYVE/PHD	NA			SRAE_1000329300	49.3507	SPAL_0000455900	25.3247	SVE_1873100	11.6883
SSTP_0000306000	PC1	-0.016	A0A0K0E0P8		SLC26A/SulP_fam, STAS_dom, SLC26A/SulP_dom, STAS_dom_sf	secondary active sulfate transmembrane transporter activity, sulfate transport, sulfate transmembrane transporter activity, transmembrane transport, integral component of membrane, membrane, sulfate transmembrane transport			SRAE_0000042500	80.9079	SPAL_0001646000	78.5047	SVE_1008200	19.8932
SSTP_0000636100	PC1	-0.016	A0A0K0EA31		NA	NA			SRAE_2000515500	30.1223	SPAL_0001169400	22.9358	SVE_0237300	38.2263
SSTP_0000165200	PC1	-0.016	A0A0K0DWN5	Zinc metalloproteinase	CUB_dom, Peptidase_M12A, Peptidase_Metallo, EGF-like_CS, Metallopeptidase_nem, Astacin-like_dom, Sperma_CUB_dom_sf	molting cycle, collagen and cuticulin-based cuticle, metalloendopeptidase activity, metallopeptidase activity, proteolysis, zinc ion binding, extracellular region			SRAE_2000528200	66.5281	SPAL_0000399500	46.1538	SVE_1701700	35.7588
SSTP_0000699100	PC1	-0.016	A0A0K0EBX2		NA	NA			SRAE_X000237300	17.4419	SPAL_0000837600	20.155
SSTP_0000689800	PC1	-0.016	A0A0K0EBM7		Peptidase_C19_UCH, EF_hand_dom, EF-hand-dom_pair, USP_CS, EF_Hand_1_Ca_BS, USP_dom, DUSP-like_sf, Papain-like_cys_pep_sf	thiol-dependent ubiquitinyl hydrolase activity, protein deubiquitination, calcium ion binding, ubiquitin-dependent protein catabolic process			SRAE_2000022500	64.4764
SSTP_0000539500	PC1	-0.016	A0A0K0E7B9		NA	NA			SRAE_1000160600	60.199	SPAL_0001208200	46.7662	SVE_1088400	47.7612
SSTP_0000803000	PC1	-0.016	A0A0K0EEW6		CRISP-related, CAP_domain, CAP_sf	NA	F09B9.5	8.75576	SRAE_2000077000	14.7465			SVE_1716100	19.5853
SSTP_0000398300	PC1	-0.016	A0A0K0E3B1	Innexin	Innexin	membrane, integral component of membrane, ion transport, plasma membrane, gap junction, cell junction			SRAE_2000237000	82.8431	SPAL_0001197100	78.1863	SVE_0387300	75.7353
SSTP_0000770200	PC1	-0.016	A0A0K0EDY8		CRISP-related, CAP_domain, Allrgn_V5/Tpx1_CS, SCP_GAPR1-like, CAP_sf	extracellular region	F09B9.5	17.1004	SRAE_2000080100	44.2379	SPAL_0000657500	30.4833	SVE_1681900	38.6617
SSTP_0000087300	PC1	-0.016	A0A0K0DUG0		Peptidase_S9, Peptidase_S9A, Pept_S9_AS, Pept_S9A_N, AB_hydrolase	serine-type exopeptidase activity, serine-type peptidase activity, serine-type endopeptidase activity, proteolysis			SRAE_2000399000	70.0719
SSTP_0000268300	PC1	-0.016	A0A0K0DZM2		Homeobox_dom, Homeobox-like_sf, SATB1/SATB2	chromatin remodeling, DNA binding, nucleus			SRAE_1000041800	51.3043	SPAL_0000389700	42.3188	SVE_1158300	38.5507
SSTP_0000022800	PC1	-0.016	A0A0K0DSL7		Histone_H2B, Histone_H2A/H2B/H3, Histone-fold	nucleosome, protein heterodimerization activity, DNA binding, nucleus, chromosome
SSTP_0000802100	PC1	-0.016	A0A0K0EEV7		Peptidase_C1A_C, Pept_asp_AS, Cathepsin_X, Papain-like_cys_pep_sf	cysteine-type peptidase activity, proteolysis	cpz-2	44.8598	SRAE_2000111700	74.2991	SPAL_0001004400	77.5701	SVE_0521400	76.4019
SSTP_0001147200	PC1	-0.016	A0A0K0EPU0		NA	NA			SRAE_1000093100	38.4
SSTP_0001191900	PC1	-0.016	A0A0K0ER37		SAM, Ankyrin_rpt, SAM/pointed_sf, Ankyrin_rpt-contain_dom, Ankyrin_rpt-contain_sf	protein binding	mlt-3	17.5281	SRAE_1000074200	87.6404	SPAL_0000743000	77.9775	SVE_1022200	73.7079
SSTP_0000366000	PC1	-0.016	A0A0K0E2E0	Metalloendopeptidase	Peptidase_M12A, Peptidase_Metallo, EGF-like_CS, MetalloPept_cat_dom_sf, Sperma_CUB_dom_sf	metalloendopeptidase activity, metallopeptidase activity, proteolysis, zinc ion binding, metal ion binding, hydrolase activity, peptidase activity							SVE_1703900	33.1019
SSTP_0000504000	PC1	-0.016	A0A0K0E6A9		NA	NA
SSTP_0000074400	PC1	-0.016	A0A0K0DU28		NA	NA
SSTP_0000378000	PC1	-0.016	A0A0K0E2R1	Metalloendopeptidase	Peptidase_M12A, Peptidase_Metallo, MetalloPept_cat_dom_sf	metalloendopeptidase activity, metallopeptidase activity, proteolysis, zinc ion binding, metal ion binding, hydrolase activity, peptidase activity			SRAE_2000469200	77.5194	SPAL_0001170900	64.0827
SSTP_0000482400	PC1	-0.016	A0A0K0E5N6		CAP_sf	NA			SRAE_2000124500	24.7557
SSTP_0000821600	PC1	-0.016	A0A0K0EFF3		NA	NA			SRAE_1000096500	33.6043
SSTP_0000527400	PC1	-0.016	A0A0K0E700		BTB/POZ_dom	protein binding			SRAE_1000043600	77.7778	SPAL_0000175800	66.9753
SSTP_0000571400	PC1	-0.016	A0A0K0E883		NA	NA			SRAE_1000231200	82.1138	SPAL_0001290400	78.8618	SVE_0161600	79.2683
SSTP_0000153200	PC1	-0.016	A0A0K0DWB5		NA	NA			SRAE_2000179800	39.7887	SPAL_0001204700	30.1056	SVE_1628500	27.1127
SSTP_0000759800	PC1	-0.016	A0A0K0EDN6		NA	membrane, integral component of membrane			SRAE_2000285800	86.4048	SPAL_0000887100	79.1541	SVE_1715700	78.5499
SSTP_0000022900	PC1	-0.017			NA	NA			SRAE_1000350000	40.1108	SPAL_0000353800	30.6171	SVE_1659700	4.50949
SSTP_0000986700	PC1	-0.017	A0A0K0EK74		CRISP-related, CAP_domain, CAP_sf	NA			SRAE_2000130200	38.0952
SSTP_0000307900	PC1	-0.017	A0A0K0E0R7		Tudor, SNase_OB-fold_sf	NA			SRAE_0000044100	59.0141	SPAL_0000160500	58.0282	SVE_1010000	56.9014
SSTP_0001037100	PC1	-0.017	A0A0K0ELM7		NA	NA
SSTP_0000381000	PC1	-0.017	A0A0K0E2U1		NA	NA			SRAE_0000008000	24.537	SPAL_0000391400	12.963	SVE_1569500	22.2222
SSTP_0001000400	PC1	-0.017	A0A0K0EKL1		PTPase_domain, TYR_PHOSPHATASE_dom, Tyr_Pase_cat, Tyr_Pase_AS, Prot-tyrosine_phosphatase-like	protein dephosphorylation, protein tyrosine phosphatase activity, dephosphorylation, phosphatase activity, hydrolase activity, membrane, integral component of membrane, peptidyl-tyrosine dephosphorylation, phosphoprotein phosphatase activity	W03F11.4	7.93374	SRAE_1000263600	38.6225	SPAL_0000048300	11.3339	SVE_0202900	27.4629
SSTP_0000623300	PC1	-0.017	A0A0K0E9Q1	Presenilin	Peptidase_A22A, Preselin/SPP	protein processing, aspartic-type endopeptidase activity, integral component of membrane, hydrolase activity, membrane, endoplasmic reticulum, Golgi apparatus, proteolysis, peptidase activity, endoplasmic reticulum membrane, Golgi membrane, Notch signaling pathway	sel-12	27.3196	SRAE_1000189800	67.7835	SPAL_0000276000	60.567	SVE_1890500	56.9588
SSTP_0000257600	PC1	-0.017	A0A0K0DZB0	Metalloendopeptidase	CUB_dom, Peptidase_M12A, Peptidase_Metallo, MetalloPept_cat_dom_sf, Sperma_CUB_dom_sf	metalloendopeptidase activity, metallopeptidase activity, proteolysis, zinc ion binding, metal ion binding, hydrolase activity, peptidase activity					SPAL_0001431000	29.4264
SSTP_0001029200	PC1	-0.017	A0A0K0ELE8	Metalloendopeptidase	Peptidase_M12A, Peptidase_Metallo, MetalloPept_cat_dom_sf, Astacin-like_dom	metalloendopeptidase activity, metallopeptidase activity, proteolysis, zinc ion binding, metal ion binding, hydrolase activity, membrane, integral component of membrane, peptidase activity			Sra-stal-1	55.0725	SPAL_0000587600	34.058	SVE_0373400	35.2657
SSTP_0000453600	PC1	-0.017	A0A0K0E4W7		CRISP-related, CAP_domain, CAP_sf	NA			SRAE_2000130200	39.0625
SSTP_0000833600	PC1	-0.017	A0A0K0EFS6	Metalloendopeptidase	Peptidase_M12A, Peptidase_Metallo, MetalloPept_cat_dom_sf	metalloendopeptidase activity, metallopeptidase activity, proteolysis, zinc ion binding, metal ion binding, hydrolase activity, membrane, integral component of membrane, peptidase activity			SRAE_X000146700	50.3546	SPAL_0000929100	35.2246
SSTP_0000998200	PC1	-0.017	A0A0K0EKI8		DNA_repair_Rad4, Rad4_beta-hairpin_dom1, BHD_2	damaged DNA binding, nucleotide-excision repair, DNA binding, nucleus
SSTP_0000637800	PC1	-0.017	A0A0K0EA51		EndoU_C, EndoU-like, ENDOU	endoribonuclease activity, RNA phosphodiester bond hydrolysis, endonucleolytic	endu-1	39.4904	SRAE_X000043100	66.879	SPAL_0000176600	38.2166	SVE_1329300	50.6369
SSTP_0000189900	PC1	-0.017	A0A0K0DXD4		NA	NA					SPAL_0001036900	30.2714	SVE_0487200	29.6451
SSTP_0000894900	PC1	-0.017	A0A0K0EHJ4		Actinin_actin-bd_CS, CH-domain, EF-hand-dom_pair, CH_dom_sf, Fimbrin/Plastin	actin filament bundle assembly, actin filament binding, protein binding, actin binding	plst-1	40.7767	SRAE_1000321900	91.424	SPAL_0000895400	92.0712	SVE_1932400	91.7476
SSTP_0000161300	PC1	-0.017	A0A0K0DWJ5	RBR-type E3 ubiquitin transferase	IBR_dom, Znf_RING/FYVE/PHD, E3_UB_ligase_RBR	protein ubiquitination, ubiquitin-protein transferase activity, transferase activity, metal ion binding			SRAE_2000503400	73.5178	SPAL_0000680000	64.4269	SVE_0583500	63.2411
SSTP_0000943600	PC1	-0.017	A0A0K0EIY3		NA	NA
SSTP_0000545000	PC1	-0.017	A0A0K0E7H3		Znf_CCCH, Znf_CCCH_sf	metal ion binding			SRAE_1000230200	68.1287	SPAL_0001111700	7.89474	SVE_0149200	48.8304
SSTP_0000303700	PC1	-0.017	A0A0K0E0M4		NA	NA
SSTP_0000332300	PC1	-0.017			NA	NA	slc-36.2	50.6757	SRAE_2000322800	84.4595	SPAL_0000283800	80.4054	SVE_1616800	79.0541
SSTP_0000966600	PC1	-0.017	A0A0K0EJM5	Zinc metalloproteinase	Peptidase_M12A, Peptidase_Metallo, EGF-like_CS, Metallopeptidase_nem, Astacin-like_dom, Sperma_CUB_dom_sf	molting cycle, collagen and cuticulin-based cuticle, metalloendopeptidase activity, metallopeptidase activity, proteolysis, zinc ion binding, extracellular region	nas-31	24.1164	SRAE_2000523900	58.2121	SPAL_0000532900	44.4906
SSTP_0000321300	PC1	-0.017	A0A0K0E151		Homeobox-like_sf	DNA binding			SRAE_1000008100	68.0107	SPAL_0000389600	22.5806	SVE_0326400	32.5269
SSTP_0001200200	PC1	-0.017	A0A0K0ERC0		NA	NA			SRAE_1000010200	72.1362	SPAL_0000401100	56.6563	SVE_0200800	56.0372
SSTP_0000384700	PC1	-0.017	A0A0K0E2X8		NA	NA			SRAE_2000456800	54.3046	SPAL_0000370500	40.3974	SVE_1711700	40.3974
SSTP_0000372100	PC1	-0.017	A0A0K0E2K3		EF-hand-dom_pair	NA			SRAE_2000188800	88	SPAL_0001030600	78.6667	SVE_0494000	80.6667
SSTP_0000453500	PC1	-0.017	A0A0K0E4W6		CRISP-related, CAP_domain, CAP_sf	NA			SRAE_2000130200	40.2556
SSTP_0000642500	PC1	-0.017	A0A0K0EA99		NA	membrane, integral component of membrane			SRAE_X000037800	3.07942			SVE_1106700	4.86224
SSTP_0001131700	PC1	-0.017	A0A0K0EPD3		CAP_sf	NA			SRAE_2000124500	21.5232
SSTP_0000539600	PC1	-0.017	A0A0K0E7C0		ABC_transporter-like, AAA+_ATPase, ABC1_TM_dom, P-loop_NTPase, ABC1_TM_sf	ATPase activity, coupled to transmembrane movement of substances, ATPase activity, transmembrane transport, integral component of membrane, ATP binding, nucleotide binding, membrane, ATP hydrolysis coupled ion transmembrane transport	mrp-4	52.1522	SRAE_1000160700	90.7049	SPAL_0001208300	80.7236	SVE_1088300	88.1472
SSTP_0001115200	PC1	-0.017	A0A0K0ENW4	Metalloendopeptidase	CUB_dom, Peptidase_M12A, Peptidase_Metallo, MetalloPept_cat_dom_sf, Sperma_CUB_dom_sf	metalloendopeptidase activity, metallopeptidase activity, proteolysis, zinc ion binding, metal ion binding, hydrolase activity, peptidase activity			SRAE_2000450500	38.2353
SSTP_0000421600	PC1	-0.017	A0A0K0E3Z8		ARM-type_fold	NA			SRAE_2000193200	61.2341	SPAL_0000713300	14.554	SVE_0730000	5.16432
SSTP_0000312900	PC1	-0.017	A0A0K0E0W7		NA	NA
SSTP_0000508100	PC1	-0.017	A0A0K0E6F0		NA	NA			SRAE_1000249800	18.0212	SPAL_0000857800	19.0813	SVE_1051200	18.7279
SSTP_0000116400	PC1	-0.017	A0A0K0DV99		NHL_repeat, Znf_RING, 6-blade_b-propeller_TolB-like, NHL_repeat_subgr, Znf_RING_CS, Znf_C3HC4_RING-type	metal ion binding, protein binding	nhl-2	16.9634	SRAE_2000185800	86.178	SPAL_0001027400	78.7435	SVE_0497200	67.4346
SSTP_0000675200	PC1	-0.017	A0A0K0EB81		NA	NA
SSTP_0001126500	PC1	-0.017	A0A0K0EP78	Metalloendopeptidase	Peptidase_M12A, Peptidase_Metallo, MetalloPept_cat_dom_sf	metalloendopeptidase activity, metallopeptidase activity, proteolysis, zinc ion binding, metal ion binding, hydrolase activity, membrane, integral component of membrane, peptidase activity			Sra-stal-1	57.0048	SPAL_0000587600	36.4734	SVE_0373400	35.9903
SSTP_0000164800	PC1	-0.017	A0A0K0DWN1		Aspartic_peptidase_A1, Aspartic_peptidase_AS, Peptidase_aspartic_dom_sf, PEPTIDASE_A1, Pepsin-like_dom	aspartic-type endopeptidase activity, proteolysis, hydrolase activity, peptidase activity			SRAE_2000490110	56.4433
SSTP_0001283900	PC1	-0.017	A0A0K0ETR3		NA	NA
SSTP_0000500000	PC1	-0.017	A0A0K0E669		Endo/exonu/phosph_ase_sf	NA	angl-1	9.7619	SRAE_1000084800	29.881	SPAL_0000038100	29.6429	SVE_0267300	33.6905
SSTP_0000068700	PC1	-0.017	A0A0K0DTX1		Ankyrin_rpt, Ankyrin_rpt-contain_dom, Ankyrin_rpt-contain_sf	protein binding	mlt-4	22.9508	SRAE_1000355500	46.6583	SPAL_0000604200	43.0013	SVE_0322700	42.2446
SSTP_0000212500	PC1	-0.017	A0A0K0DY12		RNaseH-like_sf, Exonuclease_RNaseT/DNA_pol3, Rex4, RNaseH_sf, REX4_DEDDh_dom	3'-5' exonuclease activity, rRNA processing, nucleic acid binding, nucleic acid phosphodiester bond hydrolysis			SRAE_2000415200	68.0672	SPAL_0001203500	61.3445	SVE_1626700	71.8487
SSTP_0000955600	PC1	-0.017	A0A0K0EJA7	Metalloendopeptidase	Peptidase_M12A, MetalloPept_cat_dom_sf, NAS-36	molting cycle, collagen and cuticulin-based cuticle, metalloendopeptidase activity, metallopeptidase activity, proteolysis, metal ion binding, hydrolase activity, peptidase activity	hch-1	19.9475	SRAE_2000495500	45.6693
SSTP_0000286900	PC1	-0.017	A0A0K0E053		NA	NA			SRAE_1000159200	57.7093	SPAL_0000609500	38.6784	SVE_0025600	38.326
SSTP_0000247416	PC1	-0.017	A0A0K0DZ08		S-AdoMet_synthetase, S-AdoMet_synt_C, S-AdoMet_synthetase_sfam	S-adenosylmethionine biosynthetic process, methionine adenosyltransferase activity, ATP binding
SSTP_0000990200	PC1	-0.017	A0A0K0EKA8		Fungal_lipase-like, AB_hydrolase	lipid metabolic process, hydrolase activity, membrane, integral component of membrane	Y51A2B.4	24.0132	SRAE_1000045800	36.1842	SPAL_0001300800	28.6184	SVE_0343400	36.8421
SSTP_0000169600	PC1	-0.017	A0A0K0DWT0		NA	NA			SRAE_2000252800	38.8112	SPAL_0000991200	37.7622	SVE_0469200	37.4126
SSTP_0001053200	PC1	-0.017	A0A0K0EM44		CAP_sf	NA			SRAE_2000124500	21.2418
SSTP_0001019100	PC1	-0.017	A0A0K0EL47		CRISP-related, CAP_domain, CAP_sf	NA			SRAE_2000527100	49.3023	SPAL_0000870000	34.8837	SVE_0899000	36.7442
SSTP_0000908200	PC1	-0.017	A0A0K0EHX7		TLC-dom	integral component of membrane, membrane			SRAE_1000246900	67.3077	SPAL_0000153500	66.0256	SVE_0962200	81.4103
SSTP_0000803200	PC1	-0.017	A0A0K0EEW8		CRISP-related, CAP_domain, CAP_sf	membrane, integral component of membrane			SRAE_2000076400	8.36237	SPAL_0001598200	8.01394	SVE_1807700	9.7561
SSTP_0001166600	PC1	-0.017	A0A0K0EQD7		NA	membrane, integral component of membrane			SRAE_1000053800	83.3333	SPAL_0001497400	72.9167	SVE_0078900	70.8333
SSTP_0001082800	PC1	-0.017	A0A0K0EMZ0		Las1	nucleic acid phosphodiester bond hydrolysis, rRNA processing, endonuclease activity, Las1 complex			SRAE_1000058600	68.2039	SPAL_0000609400	56.7961	SVE_1341600	54.6117
SSTP_0001011100	PC1	-0.017			NA	NA			SRAE_2000091400	84.2282	SPAL_0000787400	82.8859	SVE_1837800	81.8792
SSTP_0000984700	PC1	-0.017	A0A0K0EK55		NA	NA			SRAE_2000515500	33.4963	SPAL_0001169400	29.4621	SVE_0237300	33.8631
SSTP_0001097600	PC1	-0.017	A0A0K0END9		Cholinesterase, CarbesteraseB, AB_hydrolase	cholinesterase activity
SSTP_0001018100	PC1	-0.017	A0A0K0EL37		CAP_sf	NA			SRAE_2000420700	43.9628			SVE_0885400	27.5542
SSTP_0001199600	PC1	-0.017	A0A0K0ERB3		PAZ_dom, Piwi, RNaseH-like_sf, PAZ_dom_sf, RNaseH_sf	protein binding, nucleic acid binding, gene silencing by RNA					SPAL_0001523500	23.4163	SVE_0642300	75.3394
SSTP_0000455700	PC1	-0.017	A0A0K0E4Y9		Integrase_cat-core, RNaseH-like_sf, RNaseH_sf	DNA integration, nucleic acid binding			SRAE_X000200500	10.4128
SSTP_0001102500	PC1	-0.017	A0A0K0ENI8		NA	NA
SSTP_0000722000	PC1	-0.017	A0A0K0ECK5		Vilya/Cst9/RNF212	NA			SRAE_2000096200	48.7889	SPAL_0001646300	24.9135	SVE_0809000	7.95848
SSTP_0000711400	PC1	-0.017	A0A0K0EC97		NA	NA
SSTP_0000677100	PC1	-0.017	A0A0K0EB99		NA	NA
SSTP_0000036700	PC1	-0.017	A0A0K0DT06		NA	NA			SRAE_X000167200	57.3171	SPAL_0000355800	53.0488	SVE_0309200	51.2195
SSTP_0000450800	PC1	-0.017	A0A0K0E4T8		Kelch_1, Kelch-typ_b-propeller	protein binding			SRAE_X000075300	48.8166
SSTP_0000034400	PC1	-0.017	A0A0K0DSY1		Ac_transferase_dom_sf, Ketoacyl_synth_N, Ketoacyl_synth_C, Acyl_Trfase/lysoPLipase, Thiolase-like, PKS_Beta-ketoAc_synthase_dom, KAsynt_C_assoc	transferase activity, catalytic activity			SRAE_X000137500	74.3284	SPAL_0001386700	60	SVE_0766400	59.5025
SSTP_0000157400	PC1	-0.018	A0A0K0DWF8		NGN-domain, KOW, Translation_prot_SH3-like_sf, Rib_L2_dom2, NGN_dom_sf, SPT5, KOW_Spt5_1, KOW_Spt5_3, KOW_Spt5_4, KOW_Spt5_5	regulation of DNA-templated transcription, elongation, regulation of transcription by RNA polymerase II, regulation of transcription, DNA-templated	spt-5	25.969	SRAE_2000123100	69.6382	SPAL_0000573600	66.2791	SVE_0404100	72.2222
SSTP_0000390300	PC1	-0.018	A0A0K0E332		RNaseH-like_sf	NA			SRAE_2000072100	73.5795	SPAL_0001106500	59.517	SVE_1209200	61.6477
SSTP_0000984600	PC1	-0.018	A0A0K0EK54	Metalloendopeptidase	Peptidase_M12A, Peptidase_Metallo, EGF-like_CS, MetalloPept_cat_dom_sf	metalloendopeptidase activity, metallopeptidase activity, proteolysis, zinc ion binding, metal ion binding, hydrolase activity, peptidase activity			SRAE_2000524500	14.5695	SPAL_0001394900	13.9073
SSTP_0000685600	PC1	-0.018	A0A0K0EBI5		NA	NA
SSTP_0001039900	PC1	-0.018	A0A0K0ELQ7		NA	NA
SSTP_0001115300	PC1	-0.018	A0A0K0ENW6	Metalloendopeptidase	Peptidase_M12A, Peptidase_Metallo, EGF-like_CS, MetalloPept_cat_dom_sf, Sperma_CUB_dom_sf	metalloendopeptidase activity, metallopeptidase activity, proteolysis, zinc ion binding, metal ion binding, hydrolase activity, peptidase activity					SPAL_0001248100	29.0954
SSTP_0000193700	PC1	-0.018	A0A0K0DXH2		NA	membrane, integral component of membrane			SRAE_2000156100	50.431	SPAL_0001252000	52.5862	SVE_0720200	52.5862
SSTP_0000522650	PC1	-0.018	A0A0K0E6V2		NA	NA			SRAE_X000051700	28.9474
SSTP_0000961400	PC1	-0.018	A0A0K0EJG8	Phospholipase B-like	PLipase_B-like	hydrolase activity, lipid metabolic process, phospholipase activity, lipid catabolic process	F09B12.3	51.602	SRAE_0000010400	91.9056	SPAL_0000428000	88.8702	SVE_1077900	88.027
SSTP_0000604200	PC1	-0.018	A0A0K0E958		NA	membrane, integral component of membrane			SRAE_1000312100	73.1544	SPAL_0000954900	60.7383	SVE_0315900	67.1141
SSTP_0000586700	PC1	-0.018	A0A0K0E8N5	Delta-like protein	EGF-like_dom, DSL, EGF-like_Ca-bd_dom, EGF-like_CS	cell communication, calcium ion binding, membrane, integral component of membrane, multicellular organism development			SRAE_1000226400	59.1356
SSTP_0000274200	PC1	-0.018	A0A0K0DZT1		NA	NA			SRAE_X000225400	35.4167
SSTP_0000269300	PC1	-0.018	A0A0K0DZN2		Znf_MIZ, Znf_RING/FYVE/PHD	zinc ion binding			SRAE_1000091500	54.1353	SPAL_0000444900	31.8296	SVE_1055400	32.3308
SSTP_0000453900	PC1	-0.018	A0A0K0E4X0		CRISP-related, CAP_domain, CAP_sf	NA			SRAE_2000130200	36.0119
SSTP_0000499950	PC1	-0.018	A0A0K0E668		NA	NA
SSTP_0000382700	PC1	-0.018	A0A0K0E2V8	Metalloendopeptidase	Peptidase_M12A, Peptidase_Metallo, MetalloPept_cat_dom_sf	metalloendopeptidase activity, metallopeptidase activity, proteolysis, zinc ion binding, metal ion binding, hydrolase activity, peptidase activity					SPAL_0000966700	17.1642
SSTP_0000794400	PC1	-0.018	A0A0K0EEN3		RecF/RecN/SMC_N, P-loop_NTPase	NA					SPAL_0001417300	71.8954
SSTP_0000509825	PC1	-0.018	A0A0K0E6G8		NA	NA			SRAE_2000193200	52.8169	SPAL_0000713300	16.9014	SVE_0730000	4.22535
SSTP_0001262500	PC1	-0.018	A0A0K0ET48		MFS_trans_sf	membrane, integral component of membrane			SRAE_1000017500	86.3445	SPAL_0001525200	82.563	SVE_0007400	82.1429
SSTP_0001190100	PC1	-0.018	A0A0K0ER19		Helicase_C, DEAD/DEAH_box_helicase_dom, Helicase_ATP-bd, RLR_CTR, P-loop_NTPase	nucleic acid binding, ATP binding	drh-3	17.1906	SRAE_1000075900	73.1827	SPAL_0000744900	71.0216	SVE_1020200	70.2358
SSTP_0000678900	PC1	-0.018	A0A0K0EBB8	Metalloendopeptidase	Peptidase_M12A, MetalloPept_cat_dom_sf	metalloendopeptidase activity, metallopeptidase activity, proteolysis, metal ion binding, hydrolase activity, peptidase activity					SPAL_0001560600	28.9062
SSTP_0000339100	PC1	-0.018	A0A0K0E1M2		RRM_NUP35_dom, Nucleotide-bd_a/b_plait_sf, RBD_domain_sf	nucleic acid binding, nucleus, nuclear pore, mRNA transport			SRAE_1000210900	65.4902	SPAL_0000519800	56.0784
SSTP_0000990000	PC1	-0.018	A0A0K0EKA6		CRISP-related, CAP_domain, CAP_sf	NA			SRAE_1000045900	21.3997	SPAL_0000974300	13.7281	SVE_1039500	14.9394
SSTP_0000505200	PC1	-0.018	A0A0K0E6C1		NA	NA			SRAE_1000249800	10.7452	SPAL_0000857800	10.5719	SVE_1051200	10.7452
SSTP_0000965000	PC1	-0.018	A0A0K0EJK4	Metalloendopeptidase	Peptidase_M12A, Peptidase_Metallo, EGF-like_CS, MetalloPept_cat_dom_sf, Sperma_CUB_dom_sf	metalloendopeptidase activity, metallopeptidase activity, proteolysis, zinc ion binding, metal ion binding, hydrolase activity, membrane, integral component of membrane, peptidase activity			SRAE_2000524200	48.0861	SPAL_0001248000	37.5598
SSTP_0000856600	PC1	-0.018	A0A0K0EGF5		MFS_sugar_transport-like, MFS_dom, MFS_trans_sf	transmembrane transport, transmembrane transporter activity, integral component of membrane, membrane	Y39E4B.5	44.3975	SRAE_X000229300	89.852	SPAL_0000845600	89.0063	SVE_0109700	89.2178
SSTP_0000483410	PC1	-0.018	A0A0K0E5Q1	Metalloendopeptidase	Peptidase_M12A, Peptidase_Metallo, EGF-like_CS, MetalloPept_cat_dom_sf, Sperma_CUB_dom_sf	metalloendopeptidase activity, metallopeptidase activity, proteolysis, zinc ion binding, metal ion binding, hydrolase activity, membrane, integral component of membrane, peptidase activity			SRAE_X000146700	50.2404	SPAL_0000929100	36.2981
SSTP_0001196400	PC1	-0.018	A0A0K0ER80		VANGL	multicellular organism development, integral component of membrane, membrane	vang-1	28.2828	SRAE_1000069400	81.6162	SPAL_0000738500	77.7778	SVE_1026700	75.5556
SSTP_0000001475	PC1	-0.018	A0A0K0DRZ8		NA	NA							SVE_1983500	18.0556
SSTP_0000808300	PC1	-0.018	A0A0K0EF19		CUT_dom, Lambda_DNA-bd_dom_sf	DNA binding			SRAE_2000130400	59.1002	SPAL_0000813400	33.7423	SVE_1878100	32.1063
SSTP_0000304000	PC1	-0.018	A0A0K0E0M8		NA	membrane, integral component of membrane
SSTP_0000956600	PC1	-0.018	A0A0K0EJC0		NA	membrane, integral component of membrane			SRAE_0000000500	25.6098
SSTP_0000670900	PC1	-0.018	A0A0K0EB38		Cholinesterase, CarbesteraseB, AB_hydrolase	cholinesterase activity			SRAE_X000061300	58.6387	SPAL_0000325200	54.2757	SVE_1439900	46.4223
SSTP_0001029000	PC1	-0.018	A0A0K0ELE6		NA	NA
SSTP_0001165300	PC1	-0.018	A0A0K0EQC4		F-box_dom, F-box-like_dom_sf	protein binding, membrane, integral component of membrane			SRAE_1000055600	72.4138	SPAL_0001495800	63.3952	SVE_0080500	62.5995
SSTP_0000678650	PC1	-0.018	A0A0K0EBB5		NA	NA
SSTP_0000941600	PC1	-0.018	A0A0K0EIW0		Glyco_trans_14	acetylglucosaminyltransferase activity, membrane	T14B4.9	17.7102	SRAE_2000511800	67.0841	SPAL_0000583900	63.1485	SVE_0251800	62.9696
SSTP_0001126000	PC1	-0.018	A0A0K0EP73	Metalloendopeptidase	Peptidase_M12A, Peptidase_Metallo, MetalloPept_cat_dom_sf	metalloendopeptidase activity, metallopeptidase activity, proteolysis, zinc ion binding, metal ion binding, hydrolase activity, membrane, integral component of membrane, peptidase activity			Sra-stal-1	59.952	SPAL_0000587600	37.6499	SVE_0373400	35.012
SSTP_0000336500	PC1	-0.018	A0A0K0E1J6		NA	NA			SRAE_1000204400	35.3403	SPAL_0001581100	33.5079	SVE_0986400	34.2932
SSTP_0000146100	PC1	-0.018	A0A0K0DW45		RNA-dep_RNA_pol_euk-typ	RNA-directed 5'-3' RNA polymerase activity, transcription, RNA-templated	ego-1	27.6647	SRAE_2000161900	94.3114	SPAL_0000841300	89.2216	SVE_1798700	88.7425
SSTP_0000538700	PC1	-0.018	A0A0K0E7B1		Glyco_hydro_38_N, Gal_mutarotase_sf_dom, Glyco_hydro/deAcase_b/a-brl, Glyco_hydro_38_C, Glyco_hydro_38_cen, Glyco_hydro_38_N_sf, Glyco_hydro_57/38_cen_sf, Glyco_hydro_38_cen_sf	mannose metabolic process, alpha-mannosidase activity, carbohydrate binding, carbohydrate metabolic process, catalytic activity, membrane, integral component of membrane	aman-2	33.3641	SRAE_2000460600	77.4194	SPAL_0001739400	63.318	SVE_1619300	62.9493
SSTP_0000261500	PC1	-0.018	A0A0K0DZF1		Transthyretin-like, Transthyretin-like_sf	extracellular space, membrane, integral component of membrane			SRAE_2000436800	32.0513	SPAL_0000511832	24.359	SVE_0579800	30.1282
SSTP_0000828800	PC1	-0.018	A0A0K0EFM7		NA	membrane, integral component of membrane			SRAE_0000057900	26.4286
SSTP_0000243200	PC1	-0.018	A0A0K0DYW6		Prot_kinase_dom, POLO_box_dom, Ser/Thr_kinase_AS, Kinase-like_dom_sf, POLO_box_2, POLO_box_1, POLO_box_dom_sf	protein binding, protein phosphorylation, protein kinase activity, ATP binding			SRAE_2000064700	62.6486	SPAL_0000591700	13.073	SVE_1882900	28.3531
SSTP_0001131600	PC1	-0.018	A0A0K0EPD2		CAP_sf	NA			SRAE_2000124500	12.3711
SSTP_0000675100	PC1	-0.018	A0A0K0EB80		NA	NA
SSTP_0001147600	PC1	-0.018	A0A0K0EPU4		NA	NA			SRAE_1000092400	61.7607	SPAL_0001513300	24.6217	SVE_1090000	22.8336
SSTP_0000821500	PC1	-0.018	A0A0K0EFF2		NA	NA			SRAE_1000096600	63.5338	SPAL_0000856400	54.6992	SVE_1052600	53.3835
SSTP_0001163300	PC1	-0.018	A0A0K0EQA4		F-box_dom, LRR_dom_sf, F-box-like_dom_sf	protein binding			SRAE_1000081300	22.9607	SPAL_0000644800	33.5347	SVE_0084000	37.4622
SSTP_0000854800	PC1	-0.018	A0A0K0EGD7		NA	NA
SSTP_0001242400	PC1	-0.018	A0A0K0ESJ5	Innexin	Innexin	membrane, integral component of membrane, ion transport, plasma membrane, gap junction, cell junction							SVE_1187700	75.718
SSTP_0001108100	PC1	-0.018	A0A0K0ENP4	Zinc metalloproteinase	Peptidase_M12A, Peptidase_Metallo, EGF-like_CS, Metallopeptidase_nem, MetalloPept_cat_dom_sf, Astacin-like_dom	molting cycle, collagen and cuticulin-based cuticle, metalloendopeptidase activity, metallopeptidase activity, proteolysis, zinc ion binding, metal ion binding, hydrolase activity, peptidase activity, extracellular region							SVE_0826300	37.2197
SSTP_0001066400	PC1	-0.018	A0A0K0EMH5		NA	NA			SRAE_1000314000	79.1579	SPAL_0001269500	64.6316	SVE_0366700	64.4211
SSTP_0001101500	PC1	-0.018	A0A0K0ENH8	Protein Wnt	Wnt, Wnt_CS	signaling receptor binding, Wnt signaling pathway, extracellular region, multicellular organism development			SRAE_1000106600	73.6686	SPAL_0000255400	71.3018	SVE_0255200	61.8343
SSTP_0000641100	PC1	-0.018	A0A0K0EA83		NA	NA
SSTP_0000537800	PC1	-0.018	A0A0K0E7A2		Fungal_lipase-like, AB_hydrolase	lipid metabolic process, hydrolase activity, membrane, integral component of membrane	Y51A2B.4	27.3775			SPAL_0001142700	27.0893	SVE_0342900	53.0259
SSTP_0000367900	PC1	-0.018	A0A0K0E2F9	Metalloendopeptidase	CUB_dom, Peptidase_M12A, Peptidase_Metallo, EGF-like_CS, MetalloPept_cat_dom_sf, NAS-36, Sperma_CUB_dom_sf	molting cycle, collagen and cuticulin-based cuticle, metalloendopeptidase activity, metallopeptidase activity, proteolysis, zinc ion binding, metal ion binding, hydrolase activity, peptidase activity							SVE_1185100	36.4706
SSTP_0000917300	PC1	-0.018	A0A0K0EI66		ARM-like, Mo25, ARM-type_fold	NA	mop-25.3	15.0888	SRAE_1000142600	78.1065	SPAL_0000757000	85.7988	SVE_0972400	84.9112
SSTP_0000166400	PC1	-0.018	A0A0K0DWP7		Cholinesterase, CarbesteraseB, AB_hydrolase	cholinesterase activity							SVE_1419700	43.3333
SSTP_0000643700	PC1	-0.018	A0A0K0EAB1		NA	NA
SSTP_0000407700	PC1	-0.018	A0A0K0E3K5		CRISP-related, CAP_domain, CAP_sf	NA					SPAL_0001689800	16.1074	SVE_1807900	27.1812
SSTP_0001115100	PC1	-0.018	A0A0K0ENW3	Metalloendopeptidase	CUB_dom, Peptidase_M12A, Peptidase_Metallo, MetalloPept_cat_dom_sf, Sperma_CUB_dom_sf	metalloendopeptidase activity, metallopeptidase activity, proteolysis, zinc ion binding, metal ion binding, hydrolase activity, peptidase activity			SRAE_2000450500	36.3184
SSTP_0000585200	PC1	-0.018	A0A0K0E8M0		AhpC/TSA, Thioredoxin_domain, Peroxiredoxin_C, Peroxiredoxin_AhpC-typ, Thioredoxin-like_sf	peroxiredoxin activity, antioxidant activity, oxidation-reduction process, oxidoreductase activity, cell redox homeostasis, cell, cellular oxidant detoxification	prdx-3	65.1584	SRAE_1000133600	87.7828	SPAL_0001086100	87.7828	SVE_0954500	89.1403
SSTP_0000644100	PC1	-0.018	A0A0K0EAB6		NA	NA
SSTP_0000440700	PC1	-0.018	A0A0K0E4I7	Metalloendopeptidase	CUB_dom, Peptidase_M12A, Peptidase_Metallo, EGF-like_CS, MetalloPept_cat_dom_sf, Sperma_CUB_dom_sf	metalloendopeptidase activity, metallopeptidase activity, proteolysis, zinc ion binding, metal ion binding, hydrolase activity, peptidase activity			SRAE_2000450500	37.7892
SSTP_0000526900	PC1	-0.018	A0A0K0E6Z5		Pumilio_RNA-bd_rpt, ARM-like, ARM-type_fold, PUM-HD, Pumilio_RNA-bd	RNA binding			SRAE_1000048800	74.8735	SPAL_0001521400	12.1417	SVE_0079200	69.8145
SSTP_0000509200	PC1	-0.018	A0A0K0E6G1		NA	NA			SRAE_X000022900	47.2414
SSTP_0000896800	PC1	-0.018	A0A0K0EHL3		NA	NA			SRAE_1000330300	80.2158	SPAL_0000893500	55.9353	SVE_1934200	56.4748
SSTP_0001019400	PC1	-0.018	A0A0K0EL50		Peptidase_S9, Peptidase_S9A, Pept_S9_AS, Pept_S9A_N, AB_hydrolase	serine-type exopeptidase activity, serine-type peptidase activity, serine-type endopeptidase activity, proteolysis			SRAE_2000526700	63.9323	SPAL_0001559000	38.6719
SSTP_0000998800	PC1	-0.018	A0A0K0EKJ4		NA	NA			SRAE_2000203700	57.9365	SPAL_0001671700	57.1429	SVE_0602600	54.7619
SSTP_0000256100	PC1	-0.018	A0A0K0DZ95		NA	NA			SRAE_2000434900	47.4359
SSTP_0001221600	PC1	-0.018	A0A0K0ERY6		NA	NA
SSTP_0000522600	PC1	-0.018	A0A0K0E6V1		NA	membrane, integral component of membrane			SRAE_X000051700	33.5484
SSTP_0001258300	PC1	-0.018	A0A0K0ET07		NA	NA					SPAL_0000542500	43.4066	SVE_1914800	36.2637
SSTP_0000685200	PC1	-0.018	A0A0K0EBI1		NA	NA
SSTP_0000207600	PC1	-0.019	A0A0K0DXW2		AMP-dep_Synth/Lig, AMP-binding_CS, AMP-bd_C, AMP-dep_Synthh-like_sf	catalytic activity					SPAL_0001737200	73.8983	SVE_1621500	73.7288
SSTP_0000890550	PC1	-0.019	A0A0K0EHE9		NA	NA					SPAL_0000860900	57.971
SSTP_0000269400	PC1	-0.019	A0A0K0DZN3	V-type proton ATPase subunit F	ATPase_V1-cplx_fsu_euk, ATPase_V1-cplx_f_g_su, ATPase_V1_fsu_sf	ion transmembrane transport, proton-transporting V-type ATPase, V1 domain, ATP hydrolysis coupled proton transport, proton-transporting ATPase activity, rotational mechanism, ion transport	vha-9	60.6557	SRAE_1000091600	63.9344	SPAL_0000567700	63.1148	SVE_0410000	54.0984
SSTP_0000674000	PC1	-0.019	A0A0K0EB69	Metalloendopeptidase	Peptidase_M12A, MetalloPept_cat_dom_sf	metalloendopeptidase activity, metallopeptidase activity, proteolysis, metal ion binding, hydrolase activity, peptidase activity			SRAE_X000067500	58.2697	SPAL_0000083900	44.5293
SSTP_0000493600	PC1	-0.019	A0A0K0E604		NA	NA			SRAE_X000089200	36.5297
SSTP_0000543500	PC1	-0.019	A0A0K0E7F8		NA	membrane, integral component of membrane			SRAE_1000305700	83.1461	SPAL_0000557500	75.2809
SSTP_0000107000	PC1	-0.019	A0A0K0DV04		NA	NA			SRAE_2000210500	58.6207	SPAL_0001043500	44.2529	SVE_0544600	44.8276
SSTP_0001081700	PC1	-0.019	A0A0K0EMX9		Homeobox_dom, Homeobox-like_sf, SATB1/SATB2	chromatin remodeling, DNA binding, nucleus			SRAE_1000047600	76.9679	SPAL_0000104300	55.9767	SVE_0325700	56.2682
SSTP_0000440800	PC1	-0.019	A0A0K0E4I8		NA	NA
SSTP_0000421024	PC1	-0.019	A0A0K0E3Z1		NA	NA
SSTP_0000503800	PC1	-0.019	A0A0K0E6A7		NA	membrane, integral component of membrane
SSTP_0000341100	PC1	-0.019	A0A0K0E1P3		NA	NA			SRAE_1000212800	73.0769	SPAL_0000703800	67.5481	SVE_1844800	68.2692
SSTP_0000994400	PC1	-0.019	A0A0K0EKF1	Major sperm protein	MSP_dom, PapD-like_sf, Ig-like_fold	cytoskeleton			SRAE_1000102500	68.7151	SPAL_0000176000	74.8603
SSTP_0001167500	PC1	-0.019	A0A0K0EQE6		WD40_repeat, WD40/YVTN_repeat-like_dom_sf, WD40_repeat_dom, WD40_repeat_dom_sf	protein binding	swd-2.1	23.8938	SRAE_1000019700	72.2714	SPAL_0001544500	56.9322	SVE_0679700	58.4071
SSTP_0000448500	PC1	-0.019	A0A0K0E4R5		NA	membrane, integral component of membrane			SRAE_1000028700	59.0062	SPAL_0001695700	42.236	SVE_0023400	44.0994
SSTP_0000940000	PC1	-0.019	A0A0K0EIU4		NA	NA
SSTP_0000104800	PC1	-0.019	A0A0K0DUY1		NA	NA			SRAE_2000216000	87.013	SPAL_0000033100	81.8182	SVE_1825000	81.3853
SSTP_0000320700	PC1	-0.019	A0A0K0E145		PTPase_domain, TYR_PHOSPHATASE_dom, Tyr_Pase_cat, Tyr_Pase_AS, Prot-tyrosine_phosphatase-like	protein dephosphorylation, protein tyrosine phosphatase activity, dephosphorylation, phosphatase activity, hydrolase activity, membrane, integral component of membrane, peptidyl-tyrosine dephosphorylation, phosphoprotein phosphatase activity	Y113G7C.1	10.7112	SRAE_2000267000	36.9323	SPAL_0001110300	33.0763	SVE_1912800	33.5904
SSTP_0001002200	PC1	-0.019	A0A0K0EKM9		PAZ_dom, Piwi, RNaseH-like_sf, Argonaute_Mid_dom, PAZ_dom_sf, RNaseH_sf	protein binding, nucleic acid binding, gene silencing by RNA	wago-4	26.7306	SRAE_2000473300	61.2354	SPAL_0000971200	66.6667	SVE_0524300	71.7785
SSTP_0000292300	PC1	-0.019	A0A0K0E0A9		NA	NA					SPAL_0000565500	40.5	SVE_0434500	46
SSTP_0000254900	PC1	-0.019	A0A0K0DZ84		NA	NA			SRAE_2000435900	31.1111
SSTP_0000977900	PC1	-0.019	A0A0K0EJY9		NA	NA			SRAE_2000220500	66.8639	SPAL_0001124800	53.2544	SVE_1830500	53.8462
SSTP_0000109300	PC1	-0.019	A0A0K0DV26	Metalloendopeptidase	Peptidase_M12A, Peptidase_Metallo, MetalloPept_cat_dom_sf	metalloendopeptidase activity, metallopeptidase activity, proteolysis, zinc ion binding, metal ion binding, hydrolase activity, peptidase activity			SRAE_2000408800	80.7407	SPAL_0001315500	73.0864	SVE_0675400	74.0741
SSTP_0001074700	PC1	-0.019	A0A0K0EMQ6		NA	NA
SSTP_0000685300	PC1	-0.019	A0A0K0EBI2		NA	NA
SSTP_0000139300	PC1	-0.019	A0A0K0DVX6		NA	NA					SPAL_0000917900	52.6316	SVE_0191900	41.2742
SSTP_0000254000	PC1	-0.019	A0A0K0DZ75		NA	NA
SSTP_0000665100	PC1	-0.019	A0A0K0EAX6		NA	NA					SPAL_0001455600	35.8779	SVE_0913900	35.2672
SSTP_0000007000	PC1	-0.019	A0A0K0DS62		NA	NA			SRAE_2000515500	32.4106	SPAL_0001169400	24.7982	SVE_0237300	37.8316
SSTP_0001131500	PC1	-0.019	A0A0K0EPD1		CAP_sf	membrane, integral component of membrane			SRAE_2000124500	25.1553
SSTP_0001116200	PC1	-0.019	A0A0K0ENX5		Biotin_lipoyl, Single_hybrid_motif	NA							SVE_0764300	56.338
SSTP_0001013400	PC1	-0.019	A0A0K0EKZ0		Homeobox_dom, Homeobox-like_sf	DNA binding, nucleus			SRAE_2000093500	77.3109	SPAL_0000784900	59.6639	SVE_1840300	62.1849
SSTP_0000382600	PC1	-0.019	A0A0K0E2V7	Metalloendopeptidase	Peptidase_M12A, Peptidase_Metallo, MetalloPept_cat_dom_sf	metalloendopeptidase activity, metallopeptidase activity, proteolysis, zinc ion binding, metal ion binding, hydrolase activity, peptidase activity			SRAE_2000482400	39.3035	SPAL_0001394900	10.6965
SSTP_0000981200	PC1	-0.019	A0A0K0EK21		PAP_assoc	NA	F31C3.2	26.7176	SRAE_2000233700	69.7201	SPAL_0001371600	65.1399	SVE_1702200	31.5522
SSTP_0001071400	PC1	-0.019	A0A0K0EMM4		RT_dom, Integrase_cat-core, RNaseH-like_sf, RNaseH_sf, Integrase_H2C2	DNA integration, nucleic acid binding			SRAE_0000058000	9.19431	SPAL_0000409800	6.16114	SVE_1469500	12.5118
SSTP_0000527000	PC1	-0.019	A0A0K0E6Z6		PTPase_domain, TYR_PHOSPHATASE_dom, Tyr_Pase_cat, Prot-tyrosine_phosphatase-like	protein dephosphorylation, protein tyrosine phosphatase activity, dephosphorylation, phosphatase activity, hydrolase activity, peptidyl-tyrosine dephosphorylation	Y48G9A.9	19.2308
SSTP_0000772100	PC1	-0.019	A0A0K0EE07		Cyclin_N, Cyclin-like, Cyclin-like_sf, Cyclin	NA					SPAL_0000999000	54.5035	SVE_1856400	54.5035
SSTP_0001242300	PC1	-0.019	A0A0K0ESJ4	Innexin	Innexin	membrane, integral component of membrane, ion transport, plasma membrane, gap junction, cell junction	inx-16	22.549
SSTP_0000837800	PC1	-0.019	A0A0K0EFX1		SprT-like_domain	NA	gcna-1	19.8238	SRAE_1000322000	46.696	SPAL_0000263600	41.1894	SVE_1947700	45.815
SSTP_0000829510	PC1	-0.019	A0A0K0EFN5	Metalloendopeptidase	Peptidase_M12A, Peptidase_Metallo, MetalloPept_cat_dom_sf	metalloendopeptidase activity, metallopeptidase activity, proteolysis, zinc ion binding, metal ion binding, hydrolase activity, membrane, integral component of membrane, peptidase activity			Sra-stal-1	51.7986	SPAL_0000587600	32.3741	SVE_0373400	35.012
SSTP_0001179900	PC1	-0.019	A0A0K0EQR8		Nanos/Xcar2, Znf_nanos-typ, Nanos_sf	RNA binding, zinc ion binding, regulation of translation			SRAE_0000039800	70.1754	SPAL_0001649100	63.1579	SVE_1004500	64.9123
SSTP_0001142900	PC1	-0.019	A0A0K0EPP3		NA	NA			SRAE_2000193200	54.649	SPAL_0000713300	1.70778	SVE_0730100	2.27704
SSTP_0000274800	PC1	-0.019	A0A0K0DZT7		CRISP-related, CAP_domain, CAP_sf	NA			SRAE_X000226400	59.6026	SPAL_0000685300	28.8079	SVE_0885700	26.4901
SSTP_0000738500	PC1	-0.019	A0A0K0ED21		NA	NA
SSTP_0000648300	PC1	-0.019	A0A0K0EAF9		Transthyretin-like, Transthyretin-like_sf	extracellular space			SRAE_2000523000	57.5342			SVE_1794900	38.3562
SSTP_0000963900	PC1	-0.019	A0A0K0EJJ3		CarbesteraseB, AB_hydrolase	NA					SPAL_0000136300	41.0562	SVE_0390800	37.6491
SSTP_0000876500	PC1	-0.019	A0A0K0EH05	Metalloendopeptidase	Peptidase_M12A, Peptidase_Metallo, MetalloPept_cat_dom_sf	metalloendopeptidase activity, metallopeptidase activity, proteolysis, zinc ion binding, metal ion binding, hydrolase activity, peptidase activity
SSTP_0000933500	PC1	-0.019	A0A0K0EIM9		NA	NA
SSTP_0000383400	PC1	-0.019	A0A0K0E2W5	Metalloendopeptidase	Peptidase_M12A, Peptidase_Metallo, MetalloPept_cat_dom_sf	metalloendopeptidase activity, metallopeptidase activity, proteolysis, zinc ion binding, metal ion binding, hydrolase activity, peptidase activity			SRAE_2000456500	64.7368	SPAL_0000599300	57.1053	SVE_1710200	56.8421
SSTP_0000518500	PC1	-0.019	A0A0K0E6Q7		Transthyretin-like, Transthyretin-like_sf	extracellular space, membrane, integral component of membrane
SSTP_0001266900	PC1	-0.019	A0A0K0ET92		NA	NA			SRAE_1000050300	42.1853	SPAL_0001419600	37.4827	SVE_1914100	36.9295
SSTP_0000254400	PC1	-0.019	A0A0K0DZ79		NA	membrane, integral component of membrane			SRAE_2000435900	27.0833
SSTP_0000561600	PC1	-0.019	A0A0K0E7Y7		NA	membrane, integral component of membrane			SRAE_1000193300	52.2321	SPAL_0001510600	40.1786	SVE_1680900	63.3929
SSTP_0000600200	PC1	-0.019	A0A0K0E918		IQ_motif_EF-hand-BS, CH-domain, CH_dom_sf	protein binding	aspm-1	20.5882	SRAE_1000343000	61.8824
SSTP_0000941500	PC1	-0.019	A0A0K0EIV9		Glyco_trans_14	acetylglucosaminyltransferase activity, membrane, integral component of membrane	T14B4.9	17.5292	SRAE_2000511800	65.1085	SPAL_0000583900	61.4357	SVE_0251800	61.9366
SSTP_0001043200	PC1	-0.019	A0A0K0ELU4		NA	membrane, integral component of membrane			SRAE_0000025700	26.5306
SSTP_0000538200	PC1	-0.019	A0A0K0E7A6		NA	NA
SSTP_0001018200	PC1	-0.019	A0A0K0EL38		NA	NA
SSTP_0000158400	PC1	-0.019	A0A0K0DWG7		BTB/POZ_dom, SKP1/BTB/POZ_sf	protein binding			SRAE_2000255400	60.4167	SPAL_0000994300	52.4306	SVE_0472300	50.6944
SSTP_0000575200	PC1	-0.02	A0A0K0E8C1		BIR_rpt	NA			SRAE_1000329100	64.9682			SVE_1897600	57.9618
SSTP_0001126300	PC1	-0.02	A0A0K0EP76	Metalloendopeptidase	Peptidase_M12A, Peptidase_Metallo, MetalloPept_cat_dom_sf	metalloendopeptidase activity, metallopeptidase activity, proteolysis, zinc ion binding, metal ion binding, hydrolase activity, membrane, integral component of membrane, peptidase activity			Sra-stal-1	57.9327	SPAL_0000587600	36.7788	SVE_0373400	33.4135
SSTP_0000031200	PC1	-0.02	A0A0K0DSU8	Carboxylic ester hydrolase	Cholinesterase, CarbesteraseB, Carboxylesterase_B_AS, AB_hydrolase	cholinesterase activity, hydrolase activity			SRAE_1000291800	71.5548	SPAL_0000716800	61.3074	SVE_0159500	63.0742
SSTP_0000004000	PC1	-0.02	A0A0K0DS26		CUB_dom, Peptidase_M12A, Peptidase_Metallo, EGF-like_CS, MetalloPept_cat_dom_sf, Sperma_CUB_dom_sf	metalloendopeptidase activity, metallopeptidase activity, proteolysis, zinc ion binding, metal ion binding, hydrolase activity, peptidase activity			SRAE_X000012300	50.1305	SPAL_0000973300	33.1593
SSTP_0000268100	PC1	-0.02	A0A0K0DZM0		NA	NA			SRAE_1000041400	36.1538	SPAL_0000855700	30.4615	SVE_1053400	29.3846
SSTP_0000538400	PC1	-0.02	A0A0K0E7A8	Metalloendopeptidase	Peptidase_M12A, MetalloPept_cat_dom_sf	metalloendopeptidase activity, metallopeptidase activity, proteolysis, metal ion binding, hydrolase activity, peptidase activity			SRAE_2000460200	52.8947	SPAL_0000010900	30.5263
SSTP_0001076966	PC1	-0.02	A0A0K0EMT0		NA	NA
SSTP_0000638200	PC1	-0.02	A0A0K0EA55	Hyaluronidase	Aldolase_TIM, Glycoside_hydrolase_SF, Hyaluronidase	hyalurononglucosaminidase activity, carbohydrate metabolic process, catalytic activity, metabolic process, hydrolase activity, hydrolase activity, acting on glycosyl bonds, membrane, integral component of membrane	chhy-1	25.6881	SRAE_X000016500	42.4312	SPAL_0001184900	36.0092
SSTP_0000367600	PC1	-0.02	A0A0K0E2F6		NA	NA
SSTP_0000377700	PC1	-0.02	A0A0K0E2Q8		PH_domain, PH-like_dom_sf, AHD	NA			SRAE_2000406900	79.7508			SVE_0237700	14.3302
SSTP_0000538300	PC1	-0.02	A0A0K0E7A7		NA	NA
SSTP_0000804800	PC1	-0.02	A0A0K0EEY4		NA	NA
SSTP_0000711700	PC1	-0.02	A0A0K0ECA0		NA	NA
SSTP_0000321100	PC1	-0.02	A0A0K0E149		Homeobox_dom, Homeobox-like_sf	DNA binding, nucleus			SRAE_1000008300	54.0541	SPAL_0000104900	28.1081	SVE_0977400	25.4054
SSTP_0001222200	PC1	-0.02	A0A0K0ERZ3		Transthyretin-like, Transthyretin-like_sf	extracellular space
SSTP_0000648100	PC1	-0.02	A0A0K0EAF7		TIL_dom, Ser_inhib-like_sf	NA			SRAE_2000522500	23.6842	SPAL_0000413700	23.2456	SVE_0703100	20.614
SSTP_0000982300	PC1	-0.02	A0A0K0EK32		RMI1_N, RMI1	RecQ helicase-Topo III complex, nucleotide binding	rmh-1	11.8064			SPAL_0001004200	16.5289
SSTP_0000649700	PC1	-0.02	A0A0K0EAH2	Zinc metalloproteinase	Peptidase_M12A, Peptidase_Metallo, EGF-like_CS, Metallopeptidase_nem, MetalloPept_cat_dom_sf	molting cycle, collagen and cuticulin-based cuticle, metalloendopeptidase activity, metallopeptidase activity, proteolysis, zinc ion binding, metal ion binding, hydrolase activity, peptidase activity, extracellular region					SPAL_0000410500	35.2668	SVE_1570400	36.6589
SSTP_0000808900	PC1	-0.02	A0A0K0EF24		Endo/exonu/phosph_ase_sf	NA	angl-1	13.141	SRAE_1000084800	36.6987	SPAL_0000038100	36.3782	SVE_0267300	38.4615
SSTP_0000708100	PC1	-0.02	A0A0K0EC75		CarbesteraseB, AB_hydrolase	NA
SSTP_0000268400	PC1	-0.02	A0A0K0DZM3		MIT_C, MIT_C_sf	NA			SRAE_1000041900	48.6405	SPAL_0000389800	44.4109	SVE_1158400	45.3172
SSTP_0000338700	PC1	-0.02	A0A0K0E1L8		BTB/POZ_dom, Kelch_1, SKP1/BTB/POZ_sf, BACK, Kelch-typ_b-propeller, BTB-kelch_protein	protein binding
SSTP_0000407600	PC1	-0.02	A0A0K0E3K4		CRISP-related, CAP_domain, CAP_sf	NA	F09B9.5	10.5012			SPAL_0001549100	40.3341	SVE_1860900	42.4821
SSTP_0000334200	PC1	-0.02	A0A0K0E1H4		NA	NA
SSTP_0000678200	PC1	-0.02	A0A0K0EBB0		NA	NA
SSTP_0001111600	PC1	-0.02	A0A0K0ENS9		Transthyretin-like, Transthyretin-like_sf	extracellular space, membrane, integral component of membrane	ttr-3	28.8591	SRAE_2000477300	53.6913
SSTP_0001148000	PC1	-0.02	A0A0K0EPU8		CAP_sf	NA			SRAE_2000124500	21.6393
SSTP_0000220800	PC1	-0.02	A0A0K0DY94		TIMP, TIMP-like_OB-fold	metalloendopeptidase inhibitor activity, negative regulation of endopeptidase activity, extracellular region			SRAE_2000486000	42.4837	SPAL_0001154000	49.6732	SVE_1637700	49.0196
SSTP_0000527600	PC1	-0.02			NA	NA	rha-1	16.9994	SRAE_1000043900	32.4864			SVE_0355900	30.49
SSTP_0000928000	PC1	-0.02	A0A0K0EIH5		PLipase_A2_dom_sf	arachidonic acid secretion, phospholipid metabolic process, phospholipase A2 activity, membrane, integral component of membrane			SRAE_0000078600	37.1429			SVE_1012400	55.7143
SSTP_0000517700	PC1	-0.02	A0A0K0E6P8		CRISP-related, CAP_domain, CAP_sf	NA			SRAE_2000077100	24.9084	SPAL_0001598200	16.4835
SSTP_0001270300	PC1	-0.02	A0A0K0ETC6		NA	NA
SSTP_0000517600	PC1	-0.02	A0A0K0E6P7		CRISP-related, CAP_domain, CAP_sf	NA			SRAE_2000077300	36.3958	SPAL_0001689800	16.6078	SVE_1807900	22.6148
SSTP_0000538000	PC1	-0.02	A0A0K0E7A4		NA	NA
SSTP_0001215400	PC1	-0.02	A0A0K0ERS4		ABC_transporter-like, AAA+_ATPase, ABC_transporter_CS, ABCA, P-loop_NTPase	ATPase activity, coupled to transmembrane movement of substances, ATPase activity, transmembrane transport, integral component of membrane, ATP binding, nucleotide binding, membrane, ATP hydrolysis coupled ion transmembrane transport			SRAE_2000257100	24.3976	SPAL_0001242700	63.7349	SVE_0693600	63.494
SSTP_0000385200	PC1	-0.02	A0A0K0E2Y3		NA	membrane, integral component of membrane					SPAL_0001048200	23.5669
SSTP_0000665200	PC1	-0.02	A0A0K0EAX7		Transposase_1, Homeobox-like_sf, WH-like_DNA-bd_sf, Mos1_HTH	DNA binding			SRAE_X000208700	23.0089
SSTP_0000574800	PC1	-0.02	A0A0K0E8B7		BTB/POZ_dom, TRAF-like, SKP1/BTB/POZ_sf, SPOP_C	protein binding					SPAL_0000892400	34.3558	SVE_1935400	34.3558
SSTP_0000244900	PC1	-0.02	A0A0K0DYY3		NA	NA			SRAE_X000023200	31.4516
SSTP_0001076933	PC1	-0.02	A0A0K0EMS9		NA	membrane, integral component of membrane
SSTP_0001086400	PC1	-0.02	A0A0K0EN26		Znf_C2H2_type, Znf_C2H2_sf	nucleic acid binding			SRAE_1000111500	91.4163	SPAL_0000350400	69.5279	SVE_0681900	78.97
SSTP_0001052900	PC1	-0.02	A0A0K0EM41		CAP_sf	NA			SRAE_2000124400	23.4323
SSTP_0000365200	PC1	-0.02	A0A0K0E2D2		P-loop_NTPase, DNA2/NAM7_AAA_11, DNA2/NAM7-like_AAA	NA			SRAE_2000451100	70.6242	SPAL_0001234600	51.2852	SVE_0754800	50.6732
SSTP_0000308000	PC1	-0.02	A0A0K0E0R8		AAA+_ATPase, ATPase_AAA_core, ATPase_AAA_CS, P-loop_NTPase, AAA_lid_3	ATP binding, nucleotide binding	mei-1	22.8632	SRAE_1000026500	65.3846	SPAL_0001602600	51.2821	SVE_0810200	54.2735
SSTP_0000507300	PC1	-0.02	A0A0K0E6E2		MPI_Phosphatase, Rhodanese-like_dom, Rhodanese-like_dom_sf	positive regulation of cell cycle G2/M phase transition, protein dephosphorylation, protein tyrosine phosphatase activity, intracellular, peptidyl-tyrosine dephosphorylation	cdc-25.3	21.6285			SPAL_0001626300	20.1018
SSTP_0000353200	PC1	-0.02	A0A0K0E212		CAP_sf	NA			SRAE_2000124700	40.7895
SSTP_0000060900	PC1	-0.02	A0A0K0DTP6		NA	NA			SRAE_0000069800	28.6885
SSTP_0001090200	PC1	-0.021	A0A0K0EN65		DUF45	NA
SSTP_0000571100	PC1	-0.021	A0A0K0E880		NA	NA			SRAE_1000231500	71.2062	SPAL_0001289700	42.8016	SVE_0162300	41.6342
SSTP_0001108300	PC1	-0.021	A0A0K0ENP6		Transthyretin-like	extracellular space			SRAE_2000460800	37.2549
SSTP_0001263000	PC1	-0.021	A0A0K0ET53		NA	NA			SRAE_1000014600	45.7711	SPAL_0000722800	35.3234	SVE_0072700	37.3134
SSTP_0000744700	PC1	-0.021	A0A0K0ED84		NA	NA			SRAE_2000383300	45.2632
SSTP_0000982200	PC1	-0.021	A0A0K0EK31		Prot_kinase_dom, Kinase-like_dom_sf	protein phosphorylation, protein kinase activity, ATP binding			SRAE_2000232600	22.4206	SPAL_0000724900	75.7936	SVE_1216600	76.1905
SSTP_0000453700	PC1	-0.021	A0A0K0E4W8		CRISP-related, CAP_domain, CAP_sf	NA			SRAE_2000130200	40.5512
SSTP_0000648000	PC1	-0.021	A0A0K0EAF6		EGF-like_dom, TIL_dom, Ser_inhib-like_sf	membrane, integral component of membrane			SRAE_2000522500	12.7854	SPAL_0000413700	14.3836	SVE_0703100	12.1005
SSTP_0001190200	PC1	-0.021	A0A0K0ER20		Cholinesterase, CarbesteraseB, AB_hydrolase	cholinesterase activity					SPAL_0000744800	64.386	SVE_1020300	64.9123
SSTP_0000138200	PC1	-0.021	A0A0K0DVW6		KH_dom, KH_dom_type_1, GLD-1, STAR_dimer, KH_dom_type_1_sf	regulation of translation, single-stranded RNA binding, RNA binding, nucleic acid binding	gld-1	36.802	SRAE_2000151700	74.3655	SPAL_0000095400	68.0203	SVE_0383700	67.7665
SSTP_0000257700	PC1	-0.021	A0A0K0DZB1	Alpha-1,4 glucan phosphorylase	Glyco_trans_35, Glycg_phsphrylas, GT64, Nucleotide-diphossugar_trans, Pyridoxal_P_attach_site	phosphorylase activity, glycogen phosphorylase activity, transferase activity, transferring glycosyl groups, carbohydrate metabolic process, pyridoxal phosphate binding, integral component of membrane, transferase activity, linear malto-oligosaccharide phosphorylase activity, SHG alpha-glucan phosphorylase activity	pygl-1	50.5591	SRAE_2000440500	59.7444	SPAL_0001431200	59.0256	SVE_0576600	58.3866
SSTP_0000204500	PC1	-0.021	A0A0K0DXT0		Znf_RING, Znf_RING/FYVE/PHD, Znf_RING_CS, Vilya/Cst9/RNF212	NA			SRAE_2000205600	36.9295	SPAL_0001749000	32.3651	SVE_1102800	31.9502
SSTP_0000302800	PC1	-0.021	A0A0K0E0L5		Rpn13/ADRM1, Rpn13/ADRM1_sf	cytoplasm, nucleus
SSTP_0000089400	PC1	-0.021	A0A0K0DUI1		SapB_2, SaposinB_dom, Saposin-like	NA			SRAE_2000400800	45.3608	SPAL_0000340600	44.3299	SVE_0394100	43.299
SSTP_0000364910	PC1	-0.021	A0A0K0E2C9	Metalloendopeptidase	Peptidase_M12A, MetalloPept_cat_dom_sf, Sperma_CUB_dom_sf	metalloendopeptidase activity, metallopeptidase activity, proteolysis, metal ion binding, hydrolase activity, peptidase activity			SRAE_2000450500	36.2025
SSTP_0000671000	PC1	-0.021	A0A0K0EB39		Cholinesterase, CarbesteraseB, AB_hydrolase	cholinesterase activity			SRAE_X000061300	59.1276	SPAL_0000325200	55.2504	SVE_1439900	47.1729
SSTP_0000605600	PC1	-0.021	A0A0K0E972		NA	NA			SRAE_1000311200	71.4521			SVE_0682400	48.6799
SSTP_0000274100	PC1	-0.021	A0A0K0DZT0		NA	NA
SSTP_0000994600	PC1	-0.021	A0A0K0EKF3		NA	NA			SRAE_1000102700	52.974	SPAL_0000973000	49.0706	SVE_1039900	48.1413
SSTP_0001094400	PC1	-0.021	A0A0K0ENA7		MeTrfase_NTM1, SAM-dependent_MTases	N-terminal protein amino acid methylation, methyltransferase activity			SRAE_X000128400	23.5656	SPAL_0000110900	22.7459	SVE_0138000	14.959
SSTP_0000504200	PC1	-0.021	A0A0K0E6B1		NA	NA
SSTP_0001061500	PC1	-0.021	A0A0K0EMC7		Znf_CCHC, Znf_CCHC_sf	nucleic acid binding, zinc ion binding							SVE_0065800	5.57621
SSTP_0001226700	PC1	-0.021	A0A0K0ES38		NA	NA			SRAE_2000178400	51.8341	SPAL_0001019400	48.1659	SVE_1481000	22.6475
SSTP_0000449100	PC1	-0.021	A0A0K0E4S1		Serralysin-like_metalloprot_C	NA			SRAE_2000515500	33.1361	SPAL_0001169400	26.3314	SVE_0237300	42.6035
SSTP_0001103600	PC1	-0.021	A0A0K0ENJ9		CRISP-related, CAP_domain, CAP_sf	NA			SRAE_2000457510	63.9004	SPAL_0000493600	7.88382	SVE_0398300	29.8755
SSTP_0000685400	PC1	-0.021	A0A0K0EBI3		NA	NA
SSTP_0001108600	PC1	-0.021	A0A0K0ENP9		Peptidase_S9, Peptidase_S9A, Pept_S9_AS, Pept_S9A_N, AB_hydrolase	serine-type exopeptidase activity, serine-type peptidase activity, serine-type endopeptidase activity, proteolysis, membrane, integral component of membrane			SRAE_2000461510	58.7563			SVE_0370900	37.9442
SSTP_0000834400	PC1	-0.021	A0A0K0EFT7		NA	NA			SRAE_1000324900	56.304	SPAL_0000949000	47.1503	SVE_0310200	46.4594
SSTP_0001076900	PC1	-0.021	A0A0K0EMS8		Endo/exonu/phosph_ase_sf	NA
SSTP_0000493400	PC1	-0.021	A0A0K0E602		Rpn13/ADRM1, Rpn13/ADRM1_sf	cytoplasm, nucleus
SSTP_0000684800	PC1	-0.021	A0A0K0EBH7		NA	NA
SSTP_0000421000	PC1	-0.021	A0A0K0E3Y9		NA	NA
SSTP_0000493000	PC1	-0.021	A0A0K0E5Z8		NA	NA			SRAE_X000026900	56.0284
SSTP_0000505400	PC1	-0.021	A0A0K0E6C3		NA	NA
SSTP_0000914700	PC1	-0.021	A0A0K0EI40		NA	membrane, integral component of membrane					SPAL_0000754200	50.3876	SVE_0969100	49.6124
SSTP_0000825800	PC1	-0.021	A0A0K0EFJ5		NA	membrane, integral component of membrane			SRAE_2000312300	69.496	SPAL_0000295300	72.4138	SVE_1605600	71.3528
SSTP_0000688500	PC1	-0.021	A0A0K0EBL3		PH-like_dom_sf, AHD	NA	ani-3	14.9891	SRAE_2000515700	47.8118	SPAL_0001169200	45.8424
SSTP_0000641000	PC1	-0.021	A0A0K0EA82		NA	NA
SSTP_0000757900	PC1	-0.021	A0A0K0EDL7		NA	NA
SSTP_0001099700	PC1	-0.021	A0A0K0ENG0		ARM-type_fold	NA			SRAE_2000193200	60.6498	SPAL_0000713300	26.7148	SVE_0730000	9.50662
SSTP_0000981100	PC1	-0.021			NA	NA			SRAE_2000233800	25.5446	SPAL_0000514500	20.9901
SSTP_0001280700	PC1	-0.022	A0A0K0ETN1		NA	NA					SPAL_0000523600	46.2366
SSTP_0000527900	PC1	-0.022	A0A0K0E704		Peptidase_M13, Peptidase_M13_N, Peptidase_M13_C, MetalloPept_cat_dom_sf, Peptidase_M13_dom_2	metalloendopeptidase activity, metallopeptidase activity, proteolysis	nep-19	19.3182			SPAL_0000834400	18.9394	SVE_0626800	19.697
SSTP_0001139100	PC1	-0.022	A0A0K0EPK5		AH/BAR_dom_sf	NA			SRAE_1000222800	59.6401	SPAL_0001216000	50.8997	SVE_0637200	50.1285
SSTP_0000505700	PC1	-0.022	A0A0K0E6C6		NA	NA
SSTP_0000204600	PC1	-0.022	A0A0K0DXT1		Prot_kinase_dom, Ser/Thr_kinase_AS, Kinase-like_dom_sf, Aldolase_I_AS	protein phosphorylation, protein kinase activity, ATP binding	cdk-1	53.605	SRAE_2000205500	73.3542	SPAL_0001749100	67.7116	SVE_1102900	67.0846
SSTP_0000745900	PC1	-0.022	A0A0K0ED96		Chromo-like_dom_sf	NA
SSTP_0000987400	PC1	-0.022	A0A0K0EK80		NA	NA			SRAE_2000515500	31.7003	SPAL_0001169400	22.6225	SVE_0237300	39.049
SSTP_0000089300	PC1	-0.022	A0A0K0DUI0		NA	NA
SSTP_0000505600	PC1	-0.022	A0A0K0E6C5		NA	NA
SSTP_0001019000	PC1	-0.022	A0A0K0EL46		CAP_domain, CAP_sf	NA			SRAE_2000527100	49.7653	SPAL_0000870000	30.9859	SVE_0899000	34.2723
SSTP_0001115600	PC1	-0.022	A0A0K0ENW9	Metalloendopeptidase	EGF-like_dom, Peptidase_M12A, Peptidase_Metallo, EGF-like_CS, MetalloPept_cat_dom_sf, Sperma_CUB_dom_sf	metalloendopeptidase activity, metallopeptidase activity, proteolysis, zinc ion binding, metal ion binding, hydrolase activity, peptidase activity			SRAE_2000450400	48.5564	SPAL_0001560600	29.9213	SVE_1575500	31.2336
SSTP_0001165400	PC1	-0.022	A0A0K0EQC5		Znf_PHD, Znf_FYVE_PHD, Znf_RING/FYVE/PHD, Zinc_finger_PHD-type_CS, Znf_PHD-finger	metal ion binding			SRAE_1000055500	29.4584	SPAL_0001495900	19.1546	SVE_0080400	17.5694
SSTP_0001053000	PC1	-0.022	A0A0K0EM42		CAP_sf	NA			SRAE_2000124500	21.3115
SSTP_0000467500	PC1	-0.022			NA	NA							SVE_1983500	21.1538
SSTP_0000643600	PC1	-0.022	A0A0K0EAB0		NA	NA			SRAE_X000018500	38.4422
SSTP_0000365100	PC1	-0.022	A0A0K0E2D1		ShKT_dom	NA							SVE_0734300	30.814
SSTP_0000320900	PC1	-0.022	A0A0K0E147	Purine nucleoside phosphorylase	Nucleoside_phosphorylase_d, Purine_phosphorylase, Nucleoside_phosphorylase_sf	purine-nucleoside phosphorylase activity, nucleobase-containing compound metabolic process, nucleoside metabolic process, catalytic activity, transferase activity, transferase activity, transferring glycosyl groups	K02D7.1	42.671	SRAE_1000008500	71.0098	SPAL_0000902300	59.2834	SVE_1965400	59.6091
SSTP_0000866400	PC1	-0.022	A0A0K0EGQ2		Peptidase_M8	cell adhesion, metalloendopeptidase activity, membrane, proteolysis, integral component of membrane	T13B5.9	21.4912	SRAE_X000257200	78.7281	SPAL_0001342300	68.4211	SVE_0095500	66.2281
SSTP_0000383600	PC1	-0.022	A0A0K0E2W7		Cholinesterase, CarbesteraseB, AB_hydrolase	cholinesterase activity			SRAE_2000456300	55.615	SPAL_0000599400	54.5455	SVE_1710400	54.5455
SSTP_0000510100	PC1	-0.022	A0A0K0E6H1		CAP_domain, CAP_sf	NA			SRAE_2000126600	40.0722
SSTP_0000574700	PC1	-0.022	A0A0K0E8B6		BTB/POZ_dom, TRAF-like, SKP1/BTB/POZ_sf, SPOP_C	protein binding					SPAL_0000892400	35.2761	SVE_1935400	34.3558
SSTP_0000303800	PC1	-0.022	A0A0K0E0M5		NA	NA
SSTP_0001204900	PC1	-0.022	A0A0K0ERG9	UTP--glucose-1-phosphate uridylyltransferase	UDPGP_fam, UDPGP_trans, Nucleotide-diphossugar_trans	UDP-glucose metabolic process, UTP:glucose-1-phosphate uridylyltransferase activity, uridylyltransferase activity, transferase activity, nucleotidyltransferase activity	K08E3.5	64.1732			SPAL_0001214700	86.0236	SVE_0638500	85.4331
SSTP_0001103500	PC1	-0.022	A0A0K0ENJ8		ShKT_dom	NA			SRAE_2000457600	68.4685
SSTP_0000641600	PC1	-0.022	A0A0K0EA88		NA	NA
SSTP_0000365600	PC1	-0.022	A0A0K0E2D6		NA	NA			SRAE_2000451400	53.0435	SPAL_0000443300	10.8696
SSTP_0000255200	PC1	-0.022	A0A0K0DZ87		NA	NA			SRAE_2000435900	31.8519
SSTP_0000503900	PC1	-0.022	A0A0K0E6A8		NA	NA
SSTP_0000964800	PC1	-0.022	A0A0K0EJK2	Zinc metalloproteinase	Peptidase_M12A, Peptidase_Metallo, EGF-like_CS, Metallopeptidase_nem, MetalloPept_cat_dom_sf, Astacin-like_dom, Sperma_CUB_dom_sf	molting cycle, collagen and cuticulin-based cuticle, metalloendopeptidase activity, metallopeptidase activity, proteolysis, zinc ion binding, metal ion binding, hydrolase activity, membrane, integral component of membrane, peptidase activity, extracellular region			SRAE_2000466900	51.2249			SVE_0826300	33.6303
SSTP_0000274300	PC1	-0.022	A0A0K0DZT2		NA	NA
SSTP_0000306800	PC1	-0.022	A0A0K0E0Q6		NA	NA
SSTP_0000390500	PC1	-0.022	A0A0K0E334		NA	NA
SSTP_0000804400	PC1	-0.022	A0A0K0EEY0		NA	NA
SSTP_0001262900	PC1	-0.022	A0A0K0ET52		NA	NA					SPAL_0000722900	30.9091	SVE_0072600	31.3636
SSTP_0001129500	PC1	-0.022	A0A0K0EPA8		NA	NA
SSTP_0000843700	PC1	-0.022	A0A0K0EG30		NA	NA			SRAE_2000515500	40.7583	SPAL_0001169400	31.7536	SVE_0237300	40.2844
SSTP_0001083900	PC1	-0.022	A0A0K0EN01		Alpha-crystallin/HSP, A-crystallin/Hsp20_dom, HSP20-like_chaperone	metal ion binding	hsp-17	37.037	SRAE_1000057500	85.1852			SVE_0679100	66.6667
SSTP_0000566200	PC1	-0.022	A0A0K0E832		KH_dom, KH_dom_type_1, GLD-1, STAR_dimer, KH_dom_type_1_sf	regulation of translation, single-stranded RNA binding, RNA binding, nucleic acid binding	gld-1	36.9444	SRAE_1000294900	41.3889	SPAL_0001441000	40.8333	SVE_0157500	41.3889
SSTP_0000711600	PC1	-0.022	A0A0K0EC99		NA	membrane, integral component of membrane
SSTP_0001108800	PC1	-0.022	A0A0K0ENQ1		Peptidase_S9, Peptidase_S9A, Pept_S9_AS, Pept_S9A_N, AB_hydrolase	serine-type exopeptidase activity, serine-type peptidase activity, serine-type endopeptidase activity, proteolysis			SRAE_2000461510	58.0231			SVE_0370900	37.9974
SSTP_0000538100	PC1	-0.023	A0A0K0E7A5		NA	NA
SSTP_0001263100	PC1	-0.023	A0A0K0ET54		NA	NA			SRAE_1000014500	62.5	SPAL_0000722700	46.1957	SVE_0072800	42.9348
SSTP_0001066700	PC1	-0.023	A0A0K0EMH8		RecF/RecN/SMC_N, SMC_hinge, P-loop_NTPase, SMC_hinge_sf	chromosome organization, chromosome, protein binding, ATP binding					SPAL_0000150100	50.0424	SVE_0958600	4.58015
SSTP_0000925700	PC1	-0.023	A0A0K0EIF2		Ets_dom, WH-like_DNA-bd_sf, WH_DNA-bd_sf	sequence-specific DNA binding, DNA-binding transcription factor activity, regulation of transcription, DNA-templated, nucleus, DNA binding			SRAE_1000151000	37.0155	SPAL_0001577400	26.5504	SVE_0982200	47.8682
SSTP_0000269200	PC1	-0.023	A0A0K0DZN1		Reg_chr_condens, RCC1/BLIP-II	NA			SRAE_1000108000	75.1185	SPAL_0000635800	74.8815
SSTP_0000530200	PC1	-0.023	A0A0K0E726		NA	NA			SRAE_1000061800	54.7519	SPAL_0001613200	44.8276	SVE_0550800	43.3978
SSTP_0000275100	PC1	-0.023	A0A0K0DZU0		NA	NA
SSTP_0000528200	PC1	-0.023			NA	NA			SRAE_1000059700	33.7349	SPAL_0001644500	23.7952	SVE_0005100	18.5241
SSTP_0000805100	PC1	-0.023	A0A0K0EEY7		NA	NA
SSTP_0001222000	PC1	-0.023	A0A0K0ERZ1		Transthyretin-like, Transthyretin-like_sf	extracellular space
SSTP_0000247400	PC1	-0.023	A0A0K0DZ07		Endo/exonu/phosph_ase_sf	NA	angl-1	8.61423	SRAE_1000084800	21.4419	SPAL_0000038100	20.9738	SVE_0267300	23.0337
SSTP_0001126200	PC1	-0.023	A0A0K0EP75	Metalloendopeptidase	Peptidase_M12A, Peptidase_Metallo, MetalloPept_cat_dom_sf	metalloendopeptidase activity, metallopeptidase activity, proteolysis, zinc ion binding, metal ion binding, hydrolase activity, membrane, integral component of membrane, peptidase activity			SRAE_X000146700	50.9615	SPAL_0000929100	38.4615
SSTP_0000269900	PC1	-0.023	A0A0K0DZN7		NA	membrane, integral component of membrane			SRAE_1000092100	29.0429	SPAL_0000818400	77.3927	SVE_0202800	76.8977
SSTP_0000720700	PC1	-0.023	A0A0K0ECJ2		NA	membrane, integral component of membrane			SRAE_2000197100	70.6897	SPAL_0001039800	54.5977	SVE_0548700	53.4483
SSTP_0000390700	PC1	-0.023	A0A0K0E336		NA	NA
SSTP_0000941000	PC1	-0.023	A0A0K0EIV4	Receptor expression-enhancing protein	TB2_DP1_HVA22	membrane, integral component of membrane	T03F6.6	38.2514	SRAE_2000511300	69.3989	SPAL_0000584400	63.388	SVE_0252300	62.8415
SSTP_0001081600	PC1	-0.023	A0A0K0EMX8		NA	NA			SRAE_1000047400	62.3853	SPAL_0000047300	18.9602	SVE_0325800	33.6391
SSTP_0000481900	PC1	-0.023	A0A0K0E5N1		NA	NA			SRAE_X000089200	36.9863
SSTP_0000704800	PC1	-0.023	A0A0K0EC36		NA	NA
SSTP_0000509400	PC1	-0.023	A0A0K0EPY5		Cholinesterase, CarbesteraseB, AB_hydrolase	cholinesterase activity
SSTP_0001151400	PC1	-0.023	A0A0K0EPY5		Cholinesterase, CarbesteraseB, AB_hydrolase	cholinesterase activity
SSTP_0001074000	PC1	-0.023	A0A0K0EMP9		NA	NA			SRAE_X000022900	35.3846
SSTP_0001051200	PC1	-0.023	A0A0K0EM24		NA	membrane, integral component of membrane
SSTP_0000805200	PC1	-0.023	A0A0K0EEY8		NA	NA
SSTP_0001000000	PC1	-0.023	A0A0K0EKK7		NA	NA			SRAE_2000202400	57.5221	SPAL_0001616900	51.3274
SSTP_0000966700	PC1	-0.023	A0A0K0EJM6	Zinc metalloproteinase	Peptidase_M12A, Peptidase_Metallo, Metallopeptidase_nem, Astacin-like_dom, Sperma_CUB_dom_sf	molting cycle, collagen and cuticulin-based cuticle, metalloendopeptidase activity, metallopeptidase activity, proteolysis, zinc ion binding, extracellular region	nas-31	24.948	SRAE_2000523900	54.4699	SPAL_0000532900	45.9459
SSTP_0000664600	PC1	-0.023	A0A0K0EAX1		NA	NA			SRAE_2000515500	30.9979	SPAL_0001169400	24.6285	SVE_0237300	37.5796
SSTP_0001212800	PC1	-0.023	A0A0K0ERP8		Ig_sub2, Ig-like_dom, Ig-like_fold, Ig-like_dom_sf	membrane, integral component of membrane	igcm-3	30.5691	SRAE_2000467400	68.7805	SPAL_0001560800	50.7317
SSTP_0000445400	PC1	-0.023	A0A0K0E4N5		NA	NA			SRAE_X000056800	35.4701	SPAL_0000201700	32.4786	SVE_0039000	32.4786
SSTP_0000625300	PC1	-0.023	A0A0K0E9S1		Actinin_actin-bd_CS, CH-domain, CH_dom_sf, Fimbrin/Plastin	actin filament bundle assembly, actin filament binding, protein binding, membrane, integral component of membrane, actin binding	C50C3.2	7.78325	SRAE_1000288600	61.9704	SPAL_0001632500	51.0345	SVE_0364700	49.7537
SSTP_0000507200	PC1	-0.023	A0A0K0E6E1		Rpn13/ADRM1, Rpn13/ADRM1_sf	cytoplasm, nucleus
SSTP_0000955300	PC1	-0.023	A0A0K0EJA4	Metalloendopeptidase	Peptidase_M12A, MetalloPept_cat_dom_sf	metalloendopeptidase activity, metallopeptidase activity, proteolysis, metal ion binding, hydrolase activity, membrane, integral component of membrane, peptidase activity			SRAE_2000497500	46.6321	SPAL_0000010900	41.4508	SVE_0340200	43.2642
SSTP_0000804300	PC1	-0.023	A0A0K0EEX9		NA	NA
SSTP_0000804500	PC1	-0.023	A0A0K0EEY1		NA	NA			SRAE_2000046400	60.3239	SPAL_0000809200	51.6194	SVE_1961500	50.6073
SSTP_0000382300	PC1	-0.024	A0A0K0E2V4	Zinc metalloproteinase	Peptidase_M12A, Peptidase_Metallo, EGF-like_CS, Metallopeptidase_nem, Astacin-like_dom, Sperma_CUB_dom_sf	molting cycle, collagen and cuticulin-based cuticle, metalloendopeptidase activity, metallopeptidase activity, proteolysis, zinc ion binding, extracellular region			SRAE_2000482710	65.4008	SPAL_0001538600	37.3418	SVE_0603200	47.2574
SSTP_0000621500	PC1	-0.024	A0A0K0E9N3		KH_dom_type_1_sf	RNA binding			SRAE_1000315600	80.1444	SPAL_0001237400	73.2852	SVE_0148700	70.3971
SSTP_0000933000	PC1	-0.024	A0A0K0EIM4		NA	NA
SSTP_0000253900	PC1	-0.024	A0A0K0DZ74		NA	NA
SSTP_0001110000	PC1	-0.024	A0A0K0ENR3		Serralysin-like_metalloprot_C	NA			SRAE_2000515500	34.6412	SPAL_0001169400	17.8627	SVE_0237300	30.9757
SSTP_0001054100	PC1	-0.024	A0A0K0EM53		Cholinesterase, CarbesteraseB, AB_hydrolase	cholinesterase activity
SSTP_0001144400	PC1	-0.024	A0A0K0EPR2		NA	membrane, integral component of membrane
SSTP_0001222300	PC1	-0.024	A0A0K0ERZ4		Transthyretin-like, Transthyretin-like_sf	extracellular space
SSTP_0000557800	PC1	-0.024	A0A0K0E7V0		MAP65_Ase1_PRC1	microtubule cytoskeleton organization, microtubule binding					SPAL_0000482500	46.2012	SVE_0164600	47.0226
SSTP_0001188800	PC1	-0.024	A0A0K0ER06		NA	NA			SRAE_1000235500	33.3333	SPAL_0000746200	46.7593	SVE_1018800	46.6049
SSTP_0000565200	PC1	-0.024	A0A0K0E822		NA	NA			SRAE_1000294000	53.9683	SPAL_0000542700	35.7143	SVE_0168000	38.0952
SSTP_0000345400	PC1	-0.024	A0A0K0E1T5		NA	NA			SRAE_X000022900	45.1299
SSTP_0001261500	PC1	-0.024	A0A0K0ET39		HMG_box_dom, HMG_box_dom_sf	nucleus, DNA binding			SRAE_1000018500	78.6008	SPAL_0001526200	69.1358	SVE_0008400	69.1358
SSTP_0000568400	PC1	-0.024			NA	NA					SPAL_0001658600	25.8197	SVE_1940800	25.4098
SSTP_0000684900	PC1	-0.024	A0A0K0EBH8		NA	NA
SSTP_0000080300	PC1	-0.024	A0A0K0DU89		Prot_kinase_dom, Ser/Thr_kinase_AS, Kinase-like_dom_sf, Protein_kinase_ATP_BS, Aur	protein phosphorylation, protein kinase activity, ATP binding, nucleotide binding, protein serine/threonine kinase activity	C56G2.5	21.2766	SRAE_2000391800	67.7305			SVE_1586600	62.0567
SSTP_0000188800	PC1	-0.024	A0A0K0DXC3		Znf_RING, Znf_RING/FYVE/PHD, Znf_RING_CS, Vilya/Cst9/RNF212	NA			SRAE_2000005500	54.7368	SPAL_0001290500	25.7895	SVE_0161500	33.1579
SSTP_0001131800	PC1	-0.024	A0A0K0EPD4		Cholinesterase, CarbesteraseB, AB_hydrolase	cholinesterase activity
SSTP_0000685500	PC1	-0.024	A0A0K0EBI4		NA	NA
SSTP_0001099400	PC1	-0.024	A0A0K0ENF7		NA	NA
SSTP_0000750500	PC1	-0.024	A0A0K0EDE2		TF_DNA-bd_sf	regulation of transcription, DNA-templated, DNA binding			SRAE_2000296700	69.5804	SPAL_0001070600	62.9371	SVE_1650100	61.8881
SSTP_0000382500	PC1	-0.024	A0A0K0E2V6	Metalloendopeptidase	Peptidase_M12A, Peptidase_Metallo, MetalloPept_cat_dom_sf	metalloendopeptidase activity, metallopeptidase activity, proteolysis, zinc ion binding, metal ion binding, hydrolase activity, peptidase activity
SSTP_0000804000	PC1	-0.024	A0A0K0EEX6		NA	NA
SSTP_0000268200	PC1	-0.024	A0A0K0DZM1		NA	NA			SRAE_1000041700	36.833	SPAL_0000389600	29.0878	SVE_1158200	20.3098
SSTP_0000261000	PC1	-0.024	A0A0K0DZE6		NA	NA			SRAE_2000437300	62.2449	SPAL_0000676500	44.898	SVE_0579500	47.2789
SSTP_0000904900	PC1	-0.024	A0A0K0EHU4		NA	NA			SRAE_1000250300	42.2091	SPAL_0000858200	33.7278	SVE_1050700	32.7416
SSTP_0000528400	PC1	-0.024	A0A0K0E708		Peptidase_M13, Peptidase_M13_C, MetalloPept_cat_dom_sf, Peptidase_M13_dom_2	metalloendopeptidase activity, metallopeptidase activity, proteolysis			SRAE_1000059900	76.4583	SPAL_0001644300	52.7083	SVE_0005300	51.6667
SSTP_0000564600	PC1	-0.024	A0A0K0E816		NA	membrane, integral component of membrane			SRAE_1000293200	61.6667	SPAL_0001729100	45	SVE_0157900	46.6667
SSTP_0000467600	PC1	-0.024	A0A0K0E591		NA	NA					SPAL_0000523600	46.2366
SSTP_0001229500	PC1	-0.024	A0A0K0ES67		NA	NA
SSTP_0001115500	PC1	-0.024	A0A0K0ENW8	Metalloendopeptidase	EGF-like_dom, Peptidase_M12A, EGF-like_CS, MetalloPept_cat_dom_sf, NAS-36	molting cycle, collagen and cuticulin-based cuticle, metalloendopeptidase activity, metallopeptidase activity, proteolysis, metal ion binding, hydrolase activity, peptidase activity			SRAE_2000450400	44.0633	SPAL_0001560600	31.9261	SVE_1575500	31.6623
SSTP_0000255100	PC1	-0.024	A0A0K0DZ86		NA	NA			SRAE_2000435900	36.5517
SSTP_0000274700	PC1	-0.024	A0A0K0DZT6		Cholinesterase, CarbesteraseB, AB_hydrolase	cholinesterase activity			SRAE_X000061300	58.6491	SPAL_0000325200	55.0247	SVE_1439900	46.2932
SSTP_0000419300	PC1	-0.024	A0A0K0E3X3		Kelch_1, Gal_Oxase/kelch_b-propeller, SKP1/BTB/POZ_sf, Kelch-typ_b-propeller	protein binding			SRAE_2000379600	62.6286	SPAL_0000320500	46.1714	SVE_1579800	46.7429
SSTP_0000063600	PC1	-0.024	A0A0K0DTS2		Cholinesterase, CarbesteraseB, AB_hydrolase	cholinesterase activity
SSTP_0000325600	PC1	-0.024	A0A0K0E191		NA	NA					SPAL_0000300000	42.4069	SVE_1600300	41.5473
SSTP_0000770100	PC1	-0.025	A0A0K0EDY7		CRISP-related, CAP_domain, Allrgn_V5/Tpx1_CS, SCP_GAPR1-like, CAP_sf	extracellular region
SSTP_0000252500	PC1	-0.025	A0A0K0DZ61	Innexin	Innexin	membrane, integral component of membrane, ion transport, plasma membrane, gap junction, cell junction					SPAL_0000777000	83.2579	SVE_0421000	83.0317
SSTP_0000482966	PC1	-0.025	A0A0K0E5P3		NA	NA
SSTP_0000676800	PC1	-0.025	A0A0K0EB96		NA	NA
SSTP_0000830700	PC1	-0.025	A0A0K0EFP7		NA	NA
SSTP_0000006900	PC1	-0.025	A0A0K0DS61		Chromo/chromo_shadow_dom, Chromo-like_dom_sf, Chromo_domain	nucleus
SSTP_0000484000	PC1	-0.025	A0A0K0E5Q7		NA	NA
SSTP_0000255000	PC1	-0.025	A0A0K0DZ85		NA	NA			SRAE_2000435900	35.1724
SSTP_0000138400	PC1	-0.025	A0A0K0DVW8		Septin, P-loop_NTPase, G_SEPTIN_dom	GTP binding, nucleotide binding	unc-61	37.3002	SRAE_2000151900	88.4547	SPAL_0000095200	77.9751	SVE_0383900	73.1794
SSTP_0000998300	PC1	-0.025	A0A0K0EKI9		NA	NA
SSTP_0000379300	PC1	-0.025	A0A0K0E2S4		SOCS_box, B30.2/SPRY, SPRY_dom, ConA-like_dom_sf	protein binding	spsb-1	36.2398	SRAE_0000009400	68.3924	SPAL_0000416200	64.3052	SVE_0654300	64.0327
SSTP_0000520600	PC1	-0.025	A0A0K0E6T0		NA	NA			SRAE_2000515500	20.2027	SPAL_0001169400	13.3869	SVE_0237300	22.8941
SSTP_0000898200	PC1	-0.025	A0A0K0EHM8		NA	NA			SRAE_1000268700	27.1084
SSTP_0001215800	PC1	-0.025	A0A0K0ERS8		NA	NA			SRAE_1000297400	64.5161	SPAL_0001545500	41.9355	SVE_0220300	55.8064
SSTP_0000670800	PC1	-0.025	A0A0K0EB37		Cholinesterase, CarbesteraseB, AB_hydrolase	cholinesterase activity			SRAE_X000061300	60.6159	SPAL_0000325200	59.8055	SVE_1439900	49.7569
SSTP_0000689300	PC1	-0.025	A0A0K0EBM2		CPG4	NA			SRAE_2000023000	78.0952	SPAL_0001013400	73.3333	SVE_0511600	71.4286
SSTP_0000603600	PC1	-0.025	A0A0K0E952	Innexin	Innexin	membrane, integral component of membrane, ion transport, plasma membrane, gap junction, cell junction			SRAE_1000311600	63.9474	SPAL_0000954500	60.2632	SVE_0315600	58.6842
SSTP_0000540600	PC1	-0.025	A0A0K0E7D0		Znf_CCCH, Znf_CCCH_sf	metal ion binding			SRAE_1000161700	51.4925
SSTP_0001275700	PC1	-0.025	A0A0K0ETI1		Znf_RING-CH, Znf_RING/FYVE/PHD	zinc ion binding, metal ion binding, membrane, integral component of membrane			SRAE_1000175400	76.1261	SPAL_0001362400	67.5676	SVE_0949300	67.1171
SSTP_0000933700	PC1	-0.025	A0A0K0EIN1		NA	membrane, integral component of membrane
SSTP_0000355100	PC1	-0.025	A0A0K0E231	Sphingomyelin phosphodiesterase	Calcineurin-like_PHP_ApaH, SapB_1, SaposinB_dom, Saposin-like, Sphingomy_PDE, Metallo-depent_PP-like, ASMase/PPN1_MPP	sphingomyelin catabolic process, sphingomyelin phosphodiesterase activity, lipid metabolic process, hydrolase activity, metal ion binding, metabolic process, hydrolase activity, acting on glycosyl bonds	asm-2	47.7891	SRAE_2000429800	75.3401	SPAL_0000508700	67.6871	SVE_0380800	64.2857
SSTP_0000671100	PC1	-0.025			NA	NA			SRAE_X000061300	62.2074	SPAL_0000325200	58.0268	SVE_1439900	51.0033
SSTP_0001103400	PC1	-0.025	A0A0K0ENJ7		EGF-like_CS, MetalloPept_cat_dom_sf	metallopeptidase activity, proteolysis			SRAE_2000457710	57.0652	SPAL_0001303100	30.7065	SVE_0346000	41.5761
SSTP_0000495900	PC1	-0.025	A0A0K0E628		Transthyretin-like	extracellular space
SSTP_0001099300	PC1	-0.025	A0A0K0ENF6		MPI_Phosphatase, Rhodanese-like_dom, Rhodanese-like_dom_sf	positive regulation of cell cycle G2/M phase transition, protein dephosphorylation, protein tyrosine phosphatase activity, intracellular, peptidyl-tyrosine dephosphorylation			SRAE_1000227900	37.7823
SSTP_0000444500	PC1	-0.025	A0A0K0E4M6		NA	NA
SSTP_0000138300	PC1	-0.025	A0A0K0DVW7	Kinesin-like protein	Kinesin_motor_dom, P-loop_NTPase, Kinesin-like_fam, Kinesin_motor_dom_sf	microtubule-based movement, microtubule motor activity, microtubule binding, ATP binding, nucleotide binding, microtubule, motor activity	klp-7	30.4065	SRAE_2000151800	71.2195	SPAL_0000095300	57.8862	SVE_0383800	57.561
SSTP_0000274500	PC1	-0.025	A0A0K0DZT4		TIL_dom, Ser_inhib-like_sf	NA					SPAL_0000620600	29.1667
SSTP_0000805000	PC1	-0.025	A0A0K0EEY6	Carboxylic ester hydrolase	Cholinesterase, CarbesteraseB, Carboxylesterase_B_AS, AB_hydrolase	cholinesterase activity, hydrolase activity			SRAE_2000070700	57.2917	SPAL_0001229500	45.1389	SVE_1473400	30.3819
SSTP_0000933600	PC1	-0.025	A0A0K0EIN0		NA	NA
SSTP_0000668200	PC1	-0.025	A0A0K0EB11		Peptidase_S9, Peptidase_S9A, Pept_S9_AS, Pept_S9A_N, AB_hydrolase	serine-type exopeptidase activity, serine-type peptidase activity, serine-type endopeptidase activity, proteolysis			SRAE_X000065700	69.1799
SSTP_0001128100	PC1	-0.025	A0A0K0EP95		Chromo/chromo_shadow_dom, Chromo-like_dom_sf, Chromo_domain	nucleus
SSTP_0000493100	PC1	-0.026	A0A0K0E5Z9		Peptidase_M13, Peptidase_M13_C, MetalloPept_cat_dom_sf, Peptidase_M13_dom_2	metalloendopeptidase activity, metallopeptidase activity, proteolysis					SPAL_0001644900	13.3197
SSTP_0000505300	PC1	-0.026	A0A0K0E6C2		NA	NA			SRAE_1000249800	21.3333	SPAL_0000857800	25	SVE_1051200	26.6667
SSTP_0000863600	PC1	-0.026	A0A0K0EGM5		NA	NA
SSTP_0000528300	PC1	-0.026	A0A0K0E707		Peptidase_M13, Peptidase_M13_C, MetalloPept_cat_dom_sf, Peptidase_M13_dom_2	metalloendopeptidase activity, metallopeptidase activity, proteolysis			SRAE_1000059800	56.875	SPAL_0001644400	42.5	SVE_0005200	37.7083
SSTP_0000244700	PC1	-0.026	A0A0K0DYY0		NA	NA			SRAE_X000023200	33.3333
SSTP_0000804100	PC1	-0.026	A0A0K0EEX7		NA	NA
SSTP_0000345300	PC1	-0.026	A0A0K0E1T4		DNA_repair_Rad4, Rad4/PNGase_transGLS-fold, Rad4_beta-hairpin_dom1, BHD_2	damaged DNA binding, nucleotide-excision repair, DNA binding, nucleus	xpc-1	15.2225	SRAE_2000168000	22.9508	SPAL_0001621100	27.8689
SSTP_0001093400	PC1	-0.026	A0A0K0EN96		Glyco_hydro18_cat, Chitinase_II, Glycoside_hydrolase_SF, Chitinase_insertion_sf	chitin binding, carbohydrate metabolic process	cht-3	18.107	SRAE_X000081700	79.8354	SPAL_0001599400	68.3128	SVE_0750600	65.5144
SSTP_0001115700	PC1	-0.026	A0A0K0ENX0		UDP_glucos_trans	transferase activity, transferring hexosyl groups, transferase activity, membrane, integral component of membrane			SRAE_2000450300	69.4657
SSTP_0000933400	PC1	-0.026	A0A0K0EIM8		NA	NA			SRAE_X000055700	38.835
SSTP_0000458800	PC1	-0.026	A0A0K0E504		Chromo/chromo_shadow_dom, Chromo-like_dom_sf, Chromo_domain	nucleus
SSTP_0000828100	PC1	-0.026	A0A0K0EFM0		NA	membrane, integral component of membrane
SSTP_0001108500	PC1	-0.026	A0A0K0ENP8		Peptidase_S9, Peptidase_S9A, Pept_S9_AS, Pept_S9A_N, AB_hydrolase	serine-type exopeptidase activity, serine-type peptidase activity, serine-type endopeptidase activity, proteolysis			SRAE_2000461510	57.7447			SVE_0370900	38.29
SSTP_0000420900	PC1	-0.026			NA	NA
SSTP_0000962100	PC1	-0.026	A0A0K0EJH5		NA	NA
SSTP_0001053900	PC1	-0.026	A0A0K0EM51		Cholinesterase, CarbesteraseB, AB_hydrolase	cholinesterase activity
SSTP_0000756900	PC1	-0.026	A0A0K0EDK7		HSL_N, AB_hydrolase_3, AB_hydrolase	cholesterol metabolic process, lipase activity, lipid catabolic process, hydrolase activity	hosl-1	39.5731	SRAE_2000289000	82.7586	SPAL_0000884100	69.2939	SVE_1712600	74.0558
SSTP_0000303850	PC1	-0.026	A0A0K0E0M6		NA	NA
SSTP_0000512900	PC1	-0.026	A0A0K0E6K0		CRISP-related, V5_allergen-like, CAP_domain, Allrgn_V5/Tpx1_CS, SCP_GAPR1-like, CAP_sf	extracellular region	scl-12	21.5596					SVE_1707500	34.4037
SSTP_0000505500	PC1	-0.026	A0A0K0E6C4		NA	NA
SSTP_0000382200	PC1	-0.026	A0A0K0E2V3	Zinc metalloproteinase	Peptidase_M12A, Peptidase_Metallo, EGF-like_CS, Metallopeptidase_nem, Astacin-like_dom	molting cycle, collagen and cuticulin-based cuticle, metalloendopeptidase activity, metallopeptidase activity, proteolysis, zinc ion binding, extracellular region			SRAE_2000460300	54.9569	SPAL_0001538600	40.0862	SVE_0603200	45.9052
SSTP_0001054000	PC1	-0.026	A0A0K0EM52		Cholinesterase, CarbesteraseB, AB_hydrolase	cholinesterase activity
SSTP_0000971900	PC1	-0.026	A0A0K0EJS7		CPG4	NA			SRAE_2000264900	71.6102	SPAL_0000118700	69.0678	SVE_0463300	69.9153
SSTP_0000933300	PC1	-0.026	A0A0K0EIM7		NA	NA
SSTP_0000164600	PC1	-0.027	A0A0K0DWM9		Aspartic_peptidase_A1, Aspartic_peptidase_AS, Peptidase_aspartic_dom_sf, PEPTIDASE_A1, Pepsin-like_dom	aspartic-type endopeptidase activity, proteolysis, hydrolase activity, peptidase activity			SRAE_2000490200	71.5962
SSTP_0001216100	PC1	-0.027	A0A0K0ERT1		LRR_dom_sf	NA	B0393.3	19.6406	SRAE_1000297700	74.4544			SVE_0351900	6.03338
SSTP_0001221800	PC1	-0.027	A0A0K0ERY8		Transthyretin-like	extracellular space
SSTP_0001212600	PC1	-0.027	A0A0K0ERP6		NA	NA
SSTP_0001102600	PC1	-0.027	A0A0K0ENI9		NA	NA
SSTP_0000839000	PC1	-0.027	A0A0K0EFY3		NA	NA					SPAL_0001640800	20.6239	SVE_0402200	12.305
SSTP_0000303400	PC1	-0.027	A0A0K0E0M1		Peptidase_M12A, MetalloPept_cat_dom_sf	metalloendopeptidase activity, metallopeptidase activity, proteolysis					SPAL_0000129700	15.5263	SVE_1319100	28.9474
SSTP_0000838900	PC1	-0.027	A0A0K0EFY2		NA	NA			SRAE_1000301200	22.5166
SSTP_0000785800	PC1	-0.027	A0A0K0EEE6		Chitin_synth, Nucleotide-diphossugar_trans	transferase activity, transferring hexosyl groups, membrane, integral component of membrane	chs-1	37.0455	SRAE_2000019300	84.8485	SPAL_0001425800	88.7121	SVE_0541300	86.2879
SSTP_0001032900	PC1	-0.027	A0A0K0ELI5		Fork_head_dom, TF_fork_head_CS_2, WH-like_DNA-bd_sf, WH_DNA-bd_sf	sequence-specific DNA binding, DNA-binding transcription factor activity, regulation of transcription, DNA-templated, nucleus, DNA binding			SRAE_1000306500	47.8469	SPAL_0000556500	48.0861
SSTP_0000380800	PC1	-0.027	A0A0K0E2T9		NA	NA
SSTP_0000623900	PC1	-0.027	A0A0K0E9Q7		NA	NA
SSTP_0000623200	PC1	-0.027	A0A0K0E9Q0		PTPase_domain, TYR_PHOSPHATASE_dom, Tyr_Pase_cat, Prot-tyrosine_phosphatase-like	protein dephosphorylation, protein tyrosine phosphatase activity, dephosphorylation, phosphatase activity, hydrolase activity, peptidyl-tyrosine dephosphorylation					SPAL_0000275900	85.8998	SVE_1890600	83.4879
SSTP_0000274400	PC1	-0.027	A0A0K0DZT3	Zinc metalloproteinase	CUB_dom, Peptidase_M12A, Peptidase_Metallo, EGF-like_CS, Metallopeptidase_nem, Astacin-like_dom, Sperma_CUB_dom_sf	molting cycle, collagen and cuticulin-based cuticle, metalloendopeptidase activity, metallopeptidase activity, proteolysis, zinc ion binding, extracellular region			SRAE_X000201100	51.9669	SPAL_0001063200	39.7516	SVE_0249900	39.1304
SSTP_0000933100	PC1	-0.027	A0A0K0EIM5		NA	NA			SRAE_X000055700	39.7959
SSTP_0000485800	PC1	-0.027	A0A0K0E5S4		Transthyretin-like	extracellular space
SSTP_0000365900	PC1	-0.027	A0A0K0E2D9		Transthyretin-like	extracellular space			SRAE_2000451600	25.0965	SPAL_0001248050	22.7799
SSTP_0001038100	PC1	-0.027	A0A0K0ELN8		NA	membrane, integral component of membrane
SSTP_0001034400	PC1	-0.027	A0A0K0ELK0	Serine/threonine-protein phosphatase	Calcineurin-like_PHP_ApaH, Ser/Thr-sp_prot-phosphatase, Metallo-depent_PP-like	hydrolase activity, phosphoprotein phosphatase activity, protein dephosphorylation			SRAE_1000297100	38.2627			SVE_1030200	21.6132
SSTP_0000538500	PC1	-0.027	A0A0K0E7A9	Zinc metalloproteinase	EGF-like_dom, Peptidase_M12A, Peptidase_Metallo, Metallopeptidase_nem, Astacin-like_dom, Sperma_CUB_dom_sf	molting cycle, collagen and cuticulin-based cuticle, metalloendopeptidase activity, metallopeptidase activity, proteolysis, zinc ion binding, extracellular region					SPAL_0000851900	52.3404	SVE_1565500	51.0638
SSTP_0001263500	PC1	-0.027	A0A0K0ET58		Alpha-crystallin/HSP, A-crystallin/Hsp20_dom, HSP20-like_chaperone	metal ion binding	hsp-12.3	17.6101	SRAE_1000054400	61.6352			SVE_1876100	42.7673
SSTP_0001169000	PC1	-0.027	A0A0K0EQG1		Small_GTPase, Small_GTP-bd_dom, P-loop_NTPase	GTPase activity, GTP binding			SRAE_1000223100	59.2593	SPAL_0001240000	54.1667	SVE_0695900	55.0926
SSTP_0000777600	PC1	-0.027	A0A0K0EE64		SSD, Ptc/Disp	integral component of membrane, membrane			SRAE_2000377200	84.4776	SPAL_0001382200	79.5522	SVE_0564900	82.3881
SSTP_0000977500	PC1	-0.028	A0A0K0EJY5		Cyclin_N, Cyclin-like, Cyclin-like_sf, Cyclin	NA			SRAE_2000220100	58.8372	SPAL_0001124300	49.7674	SVE_1830000	51.1628
SSTP_0000300000	PC1	-0.028	A0A0K0E0I6		MFS_trans_sf	membrane, integral component of membrane			SRAE_1000017100	92.1488	SPAL_0001524700	90.4959	SVE_0007000	90.2893
SSTP_0000769600	PC1	-0.028	A0A0K0EDY2		NA	NA			SRAE_2000080700	51.6129	SPAL_0000347100	23.0415	SVE_0859200	35.023
SSTP_0000484900	PC1	-0.028	A0A0K0E5R6		NA	NA					SPAL_0000698600	4.70163
SSTP_0000063500	PC1	-0.028	A0A0K0DTS1		CarbesteraseB, AB_hydrolase	NA
SSTP_0000244800	PC1	-0.028	A0A0K0DYY1		NA	NA			SRAE_X000023200	34.5324
SSTP_0000219700	PC1	-0.028	A0A0K0DY83		NA	membrane, integral component of membrane			SRAE_2000487200	82.9114	SPAL_0001155400	75.9494	SVE_1636100	76.5823
SSTP_0000254700	PC1	-0.028	A0A0K0DZ82		NA	NA			SRAE_2000435900	32.5581
SSTP_0000677000	PC1	-0.028	A0A0K0EB98		NA	membrane, integral component of membrane
SSTP_0000538600	PC1	-0.028	A0A0K0E7B0	Zinc metalloproteinase	EGF-like_dom, Peptidase_M12A, Peptidase_Metallo, Metallopeptidase_nem, Astacin-like_dom	molting cycle, collagen and cuticulin-based cuticle, metalloendopeptidase activity, metallopeptidase activity, proteolysis, zinc ion binding, extracellular region			SRAE_2000460300	57.4468	SPAL_0001538600	37.8723	SVE_0603200	44.8936
SSTP_0001215300	PC1	-0.028	A0A0K0ERS3		MPI_Phosphatase, Rhodanese-like_dom, Rhodanese-like_dom_sf	positive regulation of cell cycle G2/M phase transition, protein dephosphorylation, protein tyrosine phosphatase activity, intracellular, peptidyl-tyrosine dephosphorylation			SRAE_1000227900	44.7423
SSTP_0000734800	PC1	-0.028	A0A0K0ECY3		Fungal_lipase-like, AB_hydrolase	lipid metabolic process, hydrolase activity			SRAE_0000018400	78.5047	SPAL_0000501800	63.8629	SVE_0239700	61.6822
SSTP_0001000300	PC1	-0.028	A0A0K0EKL0		NA	NA			SRAE_2000202100	57.2327	SPAL_0001616600	42.7673	SVE_0554000	42.7673
SSTP_0000804200	PC1	-0.028	A0A0K0EEX8		NA	NA
SSTP_0000963500	PC1	-0.028	A0A0K0EJI9		TF_AP2, TF_AP2_C	DNA-binding transcription factor activity, regulation of transcription, DNA-templated, nucleus	aptf-1	19.8516	SRAE_2000425900	87.013	SPAL_0000440800	81.8182	SVE_0648500	81.0761
SSTP_0000673700	PC1	-0.028	A0A0K0EB66		NA	NA			SRAE_X000067800	57.1154	SPAL_0000193300	42.1154	SVE_0048200	41.7308
SSTP_0001222100	PC1	-0.028	A0A0K0ERZ2		NA	NA
SSTP_0000395500	PC1	-0.028	A0A0K0E383		CH-domain, CH_dom_sf, Fimbrin/Plastin	actin filament bundle assembly, actin filament binding, protein binding	C50C3.2	6.70471
SSTP_0000254600	PC1	-0.028	A0A0K0DZ81		NA	membrane, integral component of membrane			SRAE_2000435900	30.3448
SSTP_0000901500	PC1	-0.028	A0A0K0EHR1		NA	NA
SSTP_0000017400	PC1	-0.028	A0A0K0DSG4		NA	NA			SRAE_2000191900	33.9506
SSTP_0001133200	PC1	-0.028	A0A0K0EPE8		Transthyretin-like	extracellular space
SSTP_0000381100	PC1	-0.028	A0A0K0E2U2		NA	NA					SPAL_0001494675	24.812	SVE_0763600	24.0602
SSTP_0000254300	PC1	-0.028	A0A0K0DZ78		NA	NA			SRAE_2000435900	36.0294
SSTP_0000700800	PC1	-0.028	A0A0K0EBZ1		Transthyretin-like, Transthyretin-like_sf	extracellular space
SSTP_0000701400	PC1	-0.028	A0A0K0EBZ1		Transthyretin-like, Transthyretin-like_sf	extracellular space
SSTP_0001213100	PC1	-0.028	A0A0K0ERQ1		NA	NA					SPAL_0001095700	18.1818	SVE_0603300	23.1818
SSTP_0000380900	PC1	-0.028	A0A0K0E2U0		NA	NA			SRAE_0000008000	29.2517	SPAL_0000391400	14.966	SVE_1569500	18.7075
SSTP_0000116600	PC1	-0.028	A0A0K0DVA1		ARM-like, FH2_Formin, Inf2	actin cytoskeleton organization			SRAE_2000185600	67.0777	SPAL_0000821000	9.74106
SSTP_0000113700	PC1	-0.028	A0A0K0DV69	Metalloendopeptidase	Peptidase_M12A, Peptidase_Metallo, MetalloPept_cat_dom_sf	metalloendopeptidase activity, metallopeptidase activity, proteolysis, zinc ion binding, metal ion binding, hydrolase activity, peptidase activity			SRAE_2000455000	64.7215	SPAL_0000598600	55.1724	SVE_1709500	54.9072
SSTP_0000255300	PC1	-0.028	A0A0K0DZ88		NA	NA			SRAE_2000435900	31.0345
SSTP_0000000600	PC1	-0.028	A0A0K0DRY6		TIL_dom, Ser_inhib-like_sf	NA			SRAE_2000522500	21.9298	SPAL_0000413700	25.8772	SVE_0703100	22.3684
SSTP_0001054300	PC1	-0.028	A0A0K0EM55		Cholinesterase, CarbesteraseB, AB_hydrolase	cholinesterase activity			SRAE_X000158300	53.5284
SSTP_0000164500	PC1	-0.028	A0A0K0DWM8		Aspartic_peptidase_A1, Aspartic_peptidase_AS, Peptidase_aspartic_dom_sf, PEPTIDASE_A1, Pepsin-like_dom	aspartic-type endopeptidase activity, proteolysis, hydrolase activity, peptidase activity			SRAE_2000490200	38.6826
SSTP_0000429800	PC1	-0.029	A0A0K0E479		NA	NA
SSTP_0000806200	PC1	-0.029	A0A0K0EEZ8		NA	NA			SRAE_2000132400	71.9298	SPAL_0000811400	56.8421	SVE_1880100	55.4386
SSTP_0001054200	PC1	-0.029	A0A0K0EM54		Cholinesterase, CarbesteraseB, AB_hydrolase	cholinesterase activity
SSTP_0000289100	PC1	-0.029	A0A0K0E074		Peptidase_S9, Peptidase_S9A, Pept_S9A_N, AB_hydrolase	serine-type exopeptidase activity, serine-type peptidase activity, serine-type endopeptidase activity, proteolysis			SRAE_X000014000	53.2397	SPAL_0001558900	39.2009	SVE_1576100	38.5529
SSTP_0000254500	PC1	-0.029	A0A0K0DZ80		NA	NA			SRAE_2000435900	34.4828
SSTP_0000608300	PC1	-0.029	A0A0K0E999		PTPase_domain, TYR_PHOSPHATASE_dom, Tyr_Pase_cat, Prot-tyrosine_phosphatase-like	protein dephosphorylation, protein tyrosine phosphatase activity, dephosphorylation, phosphatase activity, peptidyl-tyrosine dephosphorylation	egg-5	32.137	SRAE_1000344400	86.1338	SPAL_0001642900	86.46	SVE_0643400	85.8075
SSTP_0000528100	PC1	-0.029	A0A0K0E706		Znf_RanBP2, Znf_C2H2_type, OCRE	nucleic acid binding					SPAL_0001644700	37.5271	SVE_0004700	38.1779
SSTP_0000508400	PC1	-0.029	A0A0K0E6F3		NA	NA			SRAE_X000023200	33.5714
SSTP_0000611600	PC1	-0.029	A0A0K0E9D3		Alpha-crystallin/HSP, A-crystallin/Hsp20_dom, HSP20-like_chaperone	NA	hsp-12.3	21.4286	SRAE_1000066200	60.3896	SPAL_0000770200	57.7922
SSTP_0000254100	PC1	-0.029	A0A0K0DZ76		NA	NA
SSTP_0000062100	PC1	-0.029	A0A0K0DTQ7		NA	NA			SRAE_X000011000	12.1901
SSTP_0000254200	PC1	-0.029	A0A0K0DZ77		NA	NA
SSTP_0001208600	PC1	-0.029	A0A0K0ERK6		NA	NA			SRAE_1000136100	45.4683	SPAL_0001083700	24.7734	SVE_0957200	35.3474
SSTP_0000678300	PC1	-0.029	A0A0K0EBB1		NA	NA
SSTP_0000390400	PC1	-0.029	A0A0K0E333		NA	NA
SSTP_0001131100	PC1	-0.029	A0A0K0EPC7		NA	NA
SSTP_0000923800	PC1	-0.029	A0A0K0EID2		NA	membrane, integral component of membrane			SRAE_1000148900	64.5933	SPAL_0001575500	59.3301	SVE_0980000	54.067
SSTP_0000670700	PC1	-0.029	A0A0K0EB36		Peptidase_S9, Peptidase_S9A, Pept_S9A_N, AB_hydrolase	serine-type exopeptidase activity, serine-type peptidase activity, serine-type endopeptidase activity, proteolysis			SRAE_X000240300	41.7219
SSTP_0001115210	PC1	-0.029	A0A0K0ENW5	Metalloendopeptidase	CUB_dom, Peptidase_M12A, Peptidase_Metallo, EGF-like_CS, MetalloPept_cat_dom_sf, Sperma_CUB_dom_sf	metalloendopeptidase activity, metallopeptidase activity, proteolysis, zinc ion binding, metal ion binding, hydrolase activity, peptidase activity			SRAE_2000450500	36.0294
SSTP_0000809200	PC1	-0.029	A0A0K0EF27	Zinc metalloproteinase	CUB_dom, Peptidase_M12A, Peptidase_Metallo, EGF-like_CS, Metallopeptidase_nem, Astacin-like_dom, Sperma_CUB_dom_sf	molting cycle, collagen and cuticulin-based cuticle, metalloendopeptidase activity, metallopeptidase activity, proteolysis, zinc ion binding, extracellular region	nas-31	23.7006			SPAL_0001179500	40.5405	SVE_0784700	35.5509
SSTP_0001144600	PC1	-0.029	A0A0K0EPR4		CarbesteraseB, AB_hydrolase	NA
SSTP_0000107300	PC1	-0.029	A0A0K0DV07		NA	membrane, integral component of membrane			SRAE_2000210200	61.0619	SPAL_0001043700	55.7522
SSTP_0000700900	PC1	-0.03	A0A0K0EBZ2		Transthyretin-like, Transthyretin-like_sf	extracellular space
SSTP_0000701300	PC1	-0.03	A0A0K0EBZ2		Transthyretin-like, Transthyretin-like_sf	extracellular space
SSTP_0000368200	PC1	-0.03	A0A0K0E2G2	Metalloendopeptidase	Peptidase_M12A, EGF-like_CS, MetalloPept_cat_dom_sf	metalloendopeptidase activity, metallopeptidase activity, proteolysis, metal ion binding, hydrolase activity, peptidase activity
SSTP_0000233500	PC1	-0.03	A0A0K0DYL8		NA	NA			SRAE_2000362500	75.0988	SPAL_0000472600	71.5415	SVE_1764700	71.1462
SSTP_0000838800	PC1	-0.03	A0A0K0EFY1		LRR_dom_sf	NA					SPAL_0001640800	19.4158	SVE_0402200	12.3711
SSTP_0000254800	PC1	-0.03	A0A0K0DZ83		NA	NA			SRAE_2000435900	37.2414
SSTP_0001132000	PC1	-0.03	A0A0K0EPD6		ShKT_dom, Haem_peroxidase_sf, Haem_peroxidase_animal, Haem_peroxidase_sf_animal	response to oxidative stress, heme binding, peroxidase activity, oxidation-reduction process, cellular oxidant detoxification			SRAE_X000179000	80.0307	SPAL_0001260900	71.5822	SVE_0824800	72.8111
SSTP_0000530000	PC1	-0.03	A0A0K0E724		Prot_kinase_dom, POLO_box_dom, Kinase-like_dom_sf, POLO_box_1, POLO_box_dom_sf	protein binding, protein phosphorylation, protein kinase activity, ATP binding, membrane, integral component of membrane			SRAE_1000061500	51.7921	SPAL_0000029600	30.8244	SVE_1822400	35.6631
SSTP_0000240100	PC1	-0.03	A0A0K0DYT5		Fork_head_dom, TF_fork_head_CS_2, WH-like_DNA-bd_sf, WH_DNA-bd_sf	sequence-specific DNA binding, DNA-binding transcription factor activity, regulation of transcription, DNA-templated, nucleus, DNA binding			SRAE_2000061500	68.1818	SPAL_0001728500	52.1739	SVE_1852300	51.581
SSTP_0000638700	PC1	-0.03	A0A0K0EA60		CarbesteraseB, AB_hydrolase	NA			SRAE_X000061300	60.2941	SPAL_0000325200	58.0065	SVE_1439900	50.3268
SSTP_0000792400	PC1	-0.03	A0A0K0EEL3		Tudor	NA			SRAE_2000031500	67.3719	SPAL_0001419700	62.3608	SVE_0534500	61.9154
SSTP_0000635650	PC1	-0.03	A0A0K0EA26		NA	membrane, integral component of membrane
SSTP_0000676900	PC1	-0.03	A0A0K0EB97		NA	NA
SSTP_0001056100	PC1	-0.03	A0A0K0EM73		NA	NA
SSTP_0000668100	PC1	-0.03	A0A0K0EB10		TIL_dom, Ser_inhib-like_sf	NA			SRAE_0000077300	9.86111	SPAL_0000620600	14.3056	SVE_0668100	14.8611
SSTP_0000607800	PC1	-0.031	A0A0K0E994		Leu-rich_rpt, Leu-rich_rpt_typical-subtyp, LRR_dom_sf	protein binding, membrane, integral component of membrane			SRAE_1000343900	72.4481	SPAL_0001643400	65.5827	SVE_0642900	65.402
SSTP_0000164700	PC1	-0.031	A0A0K0DWN0		Aspartic_peptidase_A1, Aspartic_peptidase_AS, Peptidase_aspartic_dom_sf, PEPTIDASE_A1, Pepsin-like_dom	aspartic-type endopeptidase activity, proteolysis, hydrolase activity, peptidase activity			SRAE_2000490110	61.3402
SSTP_0000496000	PC1	-0.031	A0A0K0E629		Cholinesterase, CarbesteraseB, AB_hydrolase	cholinesterase activity			SRAE_X000195300	47.5548	SPAL_0000136300	42.8331	SVE_0390800	37.9427
SSTP_0001099100	PC1	-0.031	A0A0K0ENF4		NA	NA			SRAE_1000249800	20.7018	SPAL_0000857800	21.4035	SVE_1051200	21.0526
SSTP_0000673900	PC1	-0.031	A0A0K0EB68		NA	NA
SSTP_0001263400	PC1	-0.031	A0A0K0ET57		NA	NA					SPAL_0000722400	57.686	SVE_0518700	15.8678
SSTP_0000395000	PC1	-0.031	A0A0K0E378		KH_dom, KH_dom_type_1, GLD-1, STAR_dimer, KH_dom_type_1_sf	regulation of translation, single-stranded RNA binding, RNA binding, nucleic acid binding	gld-1	39.4015	SRAE_2000140600	89.2768	SPAL_0001081300	85.7855	SVE_0718000	86.0349
SSTP_0001084100	PC1	-0.031	A0A0K0EN03		NA	NA			SRAE_1000057400	75.1969	SPAL_0001065100	57.4803	SVE_1091400	53.1496
SSTP_0000803800	PC1	-0.031	A0A0K0EEX4		NAD(P)-bd_dom_sf	membrane, integral component of membrane			SRAE_2000136700	77.5	SPAL_0000185600	31.3889	SVE_1960300	71.1111
SSTP_0000834100	PC1	-0.031	A0A0K0EFT4		LDLR_classB_rpt, EGF-type_Asp/Asn_hydroxyl_site, EGF-like_dom, EGF-like_Ca-bd_dom, LDrepeatLR_classA_rpt, 6-blade_b-propeller_TolB-like, EGF_Ca-bd_CS, LDLR_class-A_CS, LDL_receptor-like_sf	calcium ion binding, protein binding, membrane, integral component of membrane	T13C2.6	37.5133	SRAE_1000325300	71.0946	SPAL_0001697000	56.4293
SSTP_0000794300	PC1	-0.031	A0A0K0EEN2		Prot_kinase_dom, Ser/Thr_kinase_AS, Kinase-like_dom_sf, Protein_kinase_ATP_BS	protein phosphorylation, protein kinase activity, ATP binding, nucleotide binding, protein serine/threonine kinase activity	cdk-1	55.7994	SRAE_2000029700	78.3699	SPAL_0001417400	82.1317	SVE_0532300	82.1317
SSTP_0001131200	PC1	-0.031	A0A0K0EPC8		NA	NA
SSTP_0000482933	PC1	-0.031	A0A0K0E5P2		NA	NA
SSTP_0000959700	PC1	-0.031	A0A0K0EJF1		NA	membrane, integral component of membrane			SRAE_0000012100	78.9474	SPAL_0000511000	56.8421	SVE_0214800	55.2632
SSTP_0000367700	PC1	-0.031	A0A0K0E2F7	Metalloendopeptidase	Peptidase_M12A, EGF-like_CS, MetalloPept_cat_dom_sf	metalloendopeptidase activity, metallopeptidase activity, proteolysis, metal ion binding, hydrolase activity, peptidase activity					SPAL_0001227400	47.2296	SVE_1185400	47.4934
SSTP_0000741500	PC1	-0.031	A0A0K0ED52		Cyt_P450, Cyt_P450_E_grp-I, Cyt_P450_CS, Cyt_P450_sf	oxidoreductase activity, acting on paired donors, with incorporation or reduction of molecular oxygen, iron ion binding, heme binding, oxidation-reduction process, metal ion binding, oxidoreductase activity, monooxygenase activity			SRAE_2000386700	85.8871	SPAL_0000006800	82.4597	SVE_0671100	82.0564
SSTP_0001052800	PC1	-0.031	A0A0K0EM40		Trypsin_dom, Peptidase_S1A, Peptidase_S1_PA, TRYPSIN_HIS, TRYPSIN_SER	serine-type endopeptidase activity, proteolysis, hydrolase activity, peptidase activity, serine-type peptidase activity			SRAE_X000174500	73.2143	SPAL_0000391300	71.0714
SSTP_0000383300	PC1	-0.031	A0A0K0E2W4		Cholinesterase, CarbesteraseB, AB_hydrolase	cholinesterase activity					SPAL_0000599200	55.0877	SVE_1710100	55.614
SSTP_0000397300	PC1	-0.031	A0A0K0E3A1		Pumilio_RNA-bd_rpt, ARM-like, ARM-type_fold, PUM-HD	RNA binding			SRAE_2000238200	72.8155	SPAL_0001198200	62.8641	SVE_0388400	62.8641
SSTP_0000998900	PC1	-0.032	A0A0K0EKJ5		DEP_dom, WH-like_DNA-bd_sf	intracellular signal transduction			SRAE_2000203600	84.903	SPAL_0001671600	78.8089	SVE_0602700	77.8393
SSTP_0000667900	PC1	-0.032	A0A0K0EB08		EGF-like_dom, TIL_dom, Ser_inhib-like_sf	NA			SRAE_0000077300	11.4504	SPAL_0000620600	16.6412	SVE_0668100	16.6412
SSTP_0001099200	PC1	-0.032	A0A0K0ENF5		NA	NA			SRAE_2000178400	50.8772	SPAL_0001019400	47.3684	SVE_1481000	22.6475
SSTP_0000247500	PC1	-0.032	A0A0K0DZ10		Chromo/chromo_shadow_dom, Chromo-like_dom_sf, Chromo_domain	nucleus
SSTP_0000667600	PC1	-0.032	A0A0K0EB05	Zinc metalloproteinase	Peptidase_M12A, Peptidase_Metallo, EGF-like_CS, Metallopeptidase_nem, Astacin-like_dom, Sperma_CUB_dom_sf	molting cycle, collagen and cuticulin-based cuticle, metalloendopeptidase activity, metallopeptidase activity, proteolysis, zinc ion binding, extracellular region					SPAL_0001063200	35.1351	SVE_0249900	34.9272
SSTP_0000740400	PC1	-0.032	A0A0K0ED40		CSP_DNA-bd, CSD, NA-bd_OB-fold	nucleic acid binding, membrane, integral component of membrane					SPAL_0001184400	15.9204	SVE_0106400	16.1692
SSTP_0000528000	PC1	-0.032	A0A0K0E705		Peptidase_M13, Peptidase_M13_C, MetalloPept_cat_dom_sf, Peptidase_M13_dom_2	metalloendopeptidase activity, metallopeptidase activity, proteolysis					SPAL_0001644900	27.0661	SVE_0004500	38.4298
SSTP_0000508300	PC1	-0.032	A0A0K0E6F2		NA	NA			SRAE_X000023200	30.4
SSTP_0000271300	PC1	-0.032	A0A0K0DZQ1		Chromo/chromo_shadow_dom, Chromo-like_dom_sf, Chromo_domain	nucleus
SSTP_0000605500	PC1	-0.032	A0A0K0E971		NA	NA			SRAE_1000268700	35.4839
SSTP_0000494200	PC1	-0.033	A0A0K0E610		NA	NA			SRAE_X000087000	63.3663	SPAL_0001207600	53.4653	SVE_0053400	51.9802
SSTP_0000674700	PC1	-0.033	A0A0K0EB76		Peptidase_S9, Peptidase_S9A, Pept_S9A_N, AB_hydrolase	serine-type exopeptidase activity, serine-type peptidase activity, serine-type endopeptidase activity, proteolysis			SRAE_X000014000	54.0888	SPAL_0001558900	41.5888	SVE_1576100	40.6542
SSTP_0000503100	PC1	-0.033	A0A0K0E6A0		NA	NA
SSTP_0000673800	PC1	-0.033	A0A0K0EB67		NA	NA			SRAE_X000001100	38.7629
SSTP_0001025400	PC1	-0.034	A0A0K0ELB1		NA	NA			SRAE_X000241400	83.0986	SPAL_0000377400	80.6338	SVE_0817300	77.1127
SSTP_0000459200	PC1	-0.034	A0A0K0E508		Cpg-3	NA	cpg-3	10.7937	SRAE_2000049500	23.1746	SPAL_0000485600	17.1429	SVE_1870600	18.8889
SSTP_0000021900	PC1	-0.034	A0A0K0DSK7		Cpg-3	membrane, integral component of membrane					SPAL_0000272100	47.3404	SVE_1894300	45.2128
SSTP_0001196900	PC1	-0.034	A0A0K0ER84		Chitin-bd_dom, Chitin-bd_dom_sf	chitin metabolic process, extracellular region, chitin binding	cbd-1	3.90778	SRAE_1000223500	70.5744			SVE_0695300	60.2579
SSTP_0000821400	PC1	-0.034	A0A0K0EFF1		NA	NA					SPAL_0000856500	64.2023	SVE_1052500	63.035
SSTP_0001147700	PC1	-0.035	A0A0K0EPU5		NA	NA			SRAE_X000191300	37.9032
SSTP_0001025300	PC1	-0.035	A0A0K0ELB0		NA	NA			SRAE_X000241500	84.9765	SPAL_0000377300	83.0986	SVE_0817400	77.4648
SSTP_0001211500	PC1	-0.035	A0A0K0ERN5		NA	NA			SRAE_2000476200	43	SPAL_0001066900	32.6667	SVE_1654200	31.6667
SSTP_0001052700	PC1	-0.035	A0A0K0EM39		NA	NA			SRAE_X000191300	39.5349
SSTP_0001147800	PC1	-0.035	A0A0K0EPU6		Trypsin_dom, Peptidase_S1A, Peptidase_S1_PA, TRYPSIN_HIS, TRYPSIN_SER	serine-type endopeptidase activity, proteolysis, hydrolase activity, peptidase activity, serine-type peptidase activity			SRAE_X000174500	74.1379	SPAL_0000391300	71.7241
SSTP_0000776200	PC1	-0.036	A0A0K0EE50		LDrepeatLR_classA_rpt, LDL_receptor-like_sf	protein binding, membrane, integral component of membrane	egg-2	33.8542	SRAE_2000378700	79.5139	SPAL_0001380700	61.4583	SVE_0566500	66.1458
SSTP_0000571800	PC1	-0.037	A0A0K0E887		NA	NA			SRAE_1000308000	73.0769	SPAL_0001290000	53.1469	SVE_0162000	55.5944
SSTP_0001091500	PC1	-0.039	A0A0K0EN78		Chitin-bd_dom, Chitin-bd_dom_sf	chitin metabolic process, extracellular region, chitin binding			SRAE_X000031400	78.8398	SPAL_0001609000	46.8029	SVE_1982500	71.8523
SSTP_0000806300	PC1	-0.039	A0A0K0EEZ9		ABC_transporter-like, AAA+_ATPase, ABC1_TM_dom, ABC_transporter_CS, P-loop_NTPase, ABC1_TM_sf, Type_I_exporter	ATPase activity, coupled to transmembrane movement of substances, ATPase activity, transmembrane transport, integral component of membrane, ATP binding, nucleotide binding, membrane, ATP hydrolysis coupled ion transmembrane transport	haf-2	42.0339	SRAE_2000132300	91.0734	SPAL_0000811500	86.2147	SVE_1880000	85.5367
SSTP_0000355800	PC2	0.055	A0A0K0E237		NA	NA
SSTP_0000060800	PC2	0.05	A0A0K0DTP5		CRISP-related, CAP_domain, CAP_sf	NA			SRAE_2000052500	67.4286	SPAL_0000643800	51.4286	SVE_1794700	52.5714
SSTP_0000947700	PC2	0.05	A0A0K0EJ26		NA	NA
SSTP_0000422200	PC2	0.049	A0A0K0E405	Zinc metalloproteinase	CUB_dom, Peptidase_M12A, Peptidase_Metallo, Metallopeptidase_nem, MetalloPept_cat_dom_sf, Astacin-like_dom, Sperma_CUB_dom_sf	molting cycle, collagen and cuticulin-based cuticle, metalloendopeptidase activity, metallopeptidase activity, proteolysis, zinc ion binding, metal ion binding, hydrolase activity, peptidase activity, extracellular region	nas-38	20			SPAL_0000730500	45.1948	SVE_0345600	30.9091
SSTP_0001019700	PC2	0.049	A0A0K0EL53		NA	NA
SSTP_0001008700	PC2	0.048	A0A0K0EKU4		CRISP-related, CAP_domain, Allrgn_V5/Tpx1_CS, SCP_GAPR1-like, CAP_sf	extracellular region	F09B9.5	11.4369	SRAE_0000045600	30.4985			SVE_0646900	21.9941
SSTP_0000667700	PC2	0.048	A0A0K0EB06		NA	NA			SRAE_X000225850	55.5556
SSTP_0000635500	PC2	0.047	A0A0K0EA24		NA	NA
SSTP_0000421910	PC2	0.047	A0A0K0E402	Metalloendopeptidase	Peptidase_M12A, Peptidase_Metallo, MetalloPept_cat_dom_sf	metalloendopeptidase activity, metallopeptidase activity, proteolysis, zinc ion binding, metal ion binding, hydrolase activity, peptidase activity			SRAE_2000453900	52.0202	SPAL_0000629300	45.9596
SSTP_0000649200	PC2	0.047	A0A0K0EAG7	Carboxylic ester hydrolase	Cholinesterase, CarbesteraseB, Lipase_GDXG_HIS_AS, Carboxylesterase_B_AS, AB_hydrolase	hydrolase activity, cholinesterase activity			SRAE_2000523600	70.2936			SVE_1439900	46.9775
SSTP_0000783400	PC2	0.047	A0A0K0EEC2		NA	NA			SRAE_2000209900	68.9542	SPAL_0001044000	56.5359	SVE_0544200	57.1895
SSTP_0000355900	PC2	0.046	A0A0K0E238		NA	NA
SSTP_0000947800	PC2	0.046	A0A0K0EJ27		NA	NA
SSTP_0001008500	PC2	0.045	A0A0K0EKU2		CRISP-related, CAP_domain, Allrgn_V5/Tpx1_CS, SCP_GAPR1-like, CAP_sf	extracellular region	F09B9.5	7.87879	SRAE_0000045600	18.3838			SVE_0646900	15.1515
SSTP_0000421800	PC2	0.044	A0A0K0E400	Metalloendopeptidase	Peptidase_M12A, Peptidase_Metallo, MetalloPept_cat_dom_sf, Sperma_CUB_dom_sf	metalloendopeptidase activity, metallopeptidase activity, proteolysis, zinc ion binding, metal ion binding, hydrolase activity, peptidase activity			SRAE_2000453900	56.8528	SPAL_0000629300	45.9391
SSTP_0000647900	PC2	0.043	A0A0K0EAF5		EGF-like_dom, TIL_dom, Ser_inhib-like_sf	NA	T01D3.3	20.7031			SPAL_0001569600	24.4141	SVE_1080700	26.1719
SSTP_0000852400	PC2	0.043	A0A0K0EGB4		CRISP-related, CAP_domain, CAP_sf	NA			SRAE_2000129590	30.0353
SSTP_0000367400	PC2	0.043	A0A0K0E2F4		NA	membrane, integral component of membrane			SRAE_2000452900	29.7101
SSTP_0000828300	PC2	0.043	A0A0K0EFM2		NA	NA
SSTP_0000422100	PC2	0.042	A0A0K0E404	Zinc metalloproteinase	CUB_dom, Peptidase_M12A, Peptidase_Metallo, Metallopeptidase_nem, MetalloPept_cat_dom_sf, Astacin-like_dom, Sperma_CUB_dom_sf	molting cycle, collagen and cuticulin-based cuticle, metalloendopeptidase activity, metallopeptidase activity, proteolysis, zinc ion binding, metal ion binding, hydrolase activity, peptidase activity, extracellular region					SPAL_0000730300	44.357	SVE_0065300	47.769
SSTP_0000852300	PC2	0.041	A0A0K0EGB3		CRISP-related, CAP_domain, CAP_sf	NA			SRAE_2000129590	32.7138
SSTP_0000666500	PC2	0.041	A0A0K0EAZ3		NA	membrane, integral component of membrane
SSTP_0000292000	PC2	0.041	A0A0K0E0A6		NA	NA			SRAE_1000082700	53.5433	SPAL_0000443800	44.8819	SVE_0025500	44.8819
SSTP_0001008600	PC2	0.04	A0A0K0EKU3		CRISP-related, CAP_domain, Allrgn_V5/Tpx1_CS, SCP_GAPR1-like, CAP_sf	extracellular region	F09B9.5	11.0465	SRAE_0000045600	29.0698			SVE_0646900	21.2209
SSTP_0000377900	PC2	0.04	A0A0K0E2R0	Metalloendopeptidase	Peptidase_M12A, Peptidase_Metallo, EGF-like_CS, MetalloPept_cat_dom_sf, Astacin-like_dom	metalloendopeptidase activity, metallopeptidase activity, proteolysis, zinc ion binding, metal ion binding, hydrolase activity, peptidase activity			SRAE_2000469300	70.603	SPAL_0001171000	58.5427
SSTP_0001008900	PC2	0.04	A0A0K0EKU6		CRISP-related, CAP_domain, Allrgn_V5/Tpx1_CS, SCP_GAPR1-like, CAP_sf	extracellular region	F09B9.5	6.47841	SRAE_0000045600	16.7774			SVE_0646900	12.6246
SSTP_0001127300	PC2	0.04	A0A0K0EP87		CRISP-related, CAP_domain, CAP_sf	NA			SRAE_2000129590	18.3295
SSTP_0000851900	PC2	0.04	A0A0K0EGA9		CAP_domain, CAP_sf	NA			SRAE_2000129590	34.3511
SSTP_0000505800	PC2	0.039	A0A0K0E6C7		NA	NA
SSTP_0000946400	PC2	0.039	A0A0K0EJ13		NA	NA
SSTP_0000937400	PC2	0.038	A0A0K0EIR8		NA	NA			SRAE_2000493800	47.427	SPAL_0001433900	37.1349	SVE_0336700	37.4131
SSTP_0001263500	PC2	0.038	A0A0K0ET58		Alpha-crystallin/HSP, A-crystallin/Hsp20_dom, HSP20-like_chaperone	metal ion binding	hsp-12.3	17.6101	SRAE_1000054400	61.6352			SVE_1876100	42.7673
SSTP_0000852000	PC2	0.037	A0A0K0EGB0		CRISP-related, CAP_domain, CAP_sf	NA			SRAE_2000129590	36.0465
SSTP_0000674400	PC2	0.037	A0A0K0EB73		NA	membrane, integral component of membrane
SSTP_0000506400	PC2	0.037	A0A0K0E6D3		NA	NA
SSTP_0000859300	PC2	0.037	A0A0K0EGI1		NA	NA
SSTP_0000111400	PC2	0.037	A0A0K0DV46	Metalloendopeptidase	CUB_dom, Peptidase_M12A, Peptidase_Metallo, MetalloPept_cat_dom_sf, Sperma_CUB_dom_sf	metalloendopeptidase activity, metallopeptidase activity, proteolysis, zinc ion binding, metal ion binding, hydrolase activity, peptidase activity					SPAL_0001171400	47.6923
SSTP_0000701700	PC2	0.037	A0A0K0EC02		NA	NA
SSTP_0000635600	PC2	0.037	A0A0K0EA25		NA	NA
SSTP_0000513200	PC2	0.037	A0A0K0E6K3		CRISP-related, V5_allergen-like, CAP_domain, Allrgn_V5/Tpx1_CS, SCP_GAPR1-like, CAP_sf	extracellular region	F09B9.5	13.468			SPAL_0000965600	22.5589
SSTP_0001226800	PC2	0.037	A0A0K0ES39		NA	NA
SSTP_0000852500	PC2	0.037	A0A0K0EGB5		CRISP-related, CAP_domain, CAP_sf	NA			SRAE_2000129590	26.5574
SSTP_0000961700	PC2	0.037	A0A0K0EJH1	Metalloendopeptidase	Peptidase_M12A, Peptidase_Metallo, MetalloPept_cat_dom_sf	metalloendopeptidase activity, metallopeptidase activity, proteolysis, zinc ion binding, metal ion binding, hydrolase activity, peptidase activity			SRAE_2000453900	56.3131	SPAL_0000629300	45.7071
SSTP_0000851800	PC2	0.036	A0A0K0EGA8		CRISP-related, CAP_domain, CAP_sf	NA			SRAE_2000129590	35.5805
SSTP_0000677300	PC2	0.036	A0A0K0EBA1		NA	NA
SSTP_0000164100	PC2	0.036	A0A0K0DWM4		Gp-FAR-1	lipid binding			SRAE_2000490700	65.3846	SPAL_0000410900	57.6923	SVE_1570100	54.9451
SSTP_0000506600	PC2	0.036	A0A0K0E6D5		NA	NA
SSTP_0001118700	PC2	0.036	A0A0K0EP00	Metalloendopeptidase	Peptidase_M12A, Peptidase_Metallo, MetalloPept_cat_dom_sf	metalloendopeptidase activity, metallopeptidase activity, proteolysis, zinc ion binding, metal ion binding, hydrolase activity, peptidase activity			SRAE_X000259900	67.5879	SPAL_0001597300	53.0151	SVE_0720700	51.7588
SSTP_0000834200	PC2	0.036	A0A0K0EFT5		RA_dom, FHA_dom, PDZ, Dilute_dom, SMAD_FHA_dom_sf, Ubiquitin-like_domsf, PDZ_sf	signal transduction, protein binding	afd-1	26.4963	SRAE_1000325200	68.2582	SPAL_0000700600	57.4983	SVE_1094500	57.4311
SSTP_0000863700	PC2	0.035	A0A0K0EGM6		NA	NA
SSTP_0000512800	PC2	0.035	A0A0K0E6J9		CRISP-related, CAP_domain, Allrgn_V5/Tpx1_CS, SCP_GAPR1-like, CAP_sf	extracellular region	scl-13	16.0714	SRAE_2000070500	55.7143	SPAL_0001714900	36.4286	SVE_1867100	26.4286
SSTP_0000530900	PC2	0.035	A0A0K0E733		NA	NA
SSTP_0001040400	PC2	0.035	A0A0K0ELR3		NA	NA
SSTP_0000113800	PC2	0.035	A0A0K0DV70		Cholinesterase, CarbesteraseB, AB_hydrolase	cholinesterase activity			SRAE_2000454900	67.6732	SPAL_0000598700	58.9698	SVE_1709300	60.2131
SSTP_0001212600	PC2	0.035	A0A0K0ERP6		NA	NA
SSTP_0000851700	PC2	0.034	A0A0K0EGA7		CRISP-related, CAP_domain, CAP_sf	NA			SRAE_2000129590	36.0153
SSTP_0000828400	PC2	0.034	A0A0K0EFM3		NA	membrane, integral component of membrane
SSTP_0000506900	PC2	0.034	A0A0K0E6D8		NA	NA
SSTP_0000227500	PC2	0.034	A0A0K0DYG0		TLDc_dom	NA	Y39A3CL.4	23.7374	SRAE_2000355700	84.3434
SSTP_0000677200	PC2	0.034	A0A0K0EBA0		NA	NA
SSTP_0001037100	PC2	0.034	A0A0K0ELM7		NA	NA
SSTP_0000512600	PC2	0.034	A0A0K0E6J7		CRISP-related, CAP_domain, SCP_GAPR1-like, CAP_sf	NA	scl-13	12.8405	SRAE_2000129200	42.8016
SSTP_0001040700	PC2	0.034	A0A0K0ELR6		NA	NA
SSTP_0000731700	PC2	0.033	A0A0K0ECV1		NA	NA					SPAL_0001233300	65
SSTP_0001040500	PC2	0.033	A0A0K0ELR4		NA	NA
SSTP_0000110100	PC2	0.033	A0A0K0DV34		NA	NA
SSTP_0001086700	PC2	0.033	A0A0K0EN30		ShKT_dom	NA			SRAE_X000037400	20.7675	SPAL_0001073800	16.4786	SVE_1977200	19.8646
SSTP_0000677400	PC2	0.033	A0A0K0EBA2		NA	NA
SSTP_0001103800	PC2	0.033	A0A0K0ENK1		NA	NA
SSTP_0001129300	PC2	0.033	A0A0K0EPA6		CRISP-related, CAP_domain, CAP_sf	NA			SRAE_2000129590	18.3099
SSTP_0000697600	PC2	0.032	A0A0K0EBV6		MFS, MFS_dom, MFS_trans_sf	transmembrane transport, integral component of membrane, membrane			SRAE_2000389100	79.9107	SPAL_0001539100	45.0893	SVE_0731900	53.7946
SSTP_0000737300	PC2	0.032	A0A0K0ED09		NA	NA			SRAE_0000020700	33.6957
SSTP_0000300500	PC2	0.032	A0A0K0E0J1		NA	membrane, integral component of membrane
SSTP_0000851600	PC2	0.032	A0A0K0EGA6		CRISP-related, CAP_domain, CAP_sf	NA			SRAE_2000129590	38.9105
SSTP_0000671500	PC2	0.032	A0A0K0EB43		NA	NA
SSTP_0000860200	PC2	0.032	A0A0K0EGJ0		Znf_C2H2_type, Znf_C2H2_sf	nucleic acid binding	F10B5.3	28.1385	SRAE_X000039800	87.8788	SPAL_0000533800	80.0866	SVE_0105900	81.8182
SSTP_0000851500	PC2	0.032	A0A0K0EGA5		CRISP-related, CAP_domain, CAP_sf	NA			SRAE_2000129590	35.1145
SSTP_0000513400	PC2	0.032	A0A0K0E6K5		CRISP-related, CAP_domain, Allrgn_V5/Tpx1_CS, SCP_GAPR1-like, CAP_sf	extracellular region	F09B9.5	10.9859	SRAE_0000045600	29.0141			SVE_0646900	21.6901
SSTP_0000564400	PC2	0.032	A0A0K0E814		Tyrosinase_Cu-bd, Unchr_di-copper_centre, Tyr_3	melanosome membrane, melanin biosynthetic process, oxidoreductase activity, acting on paired donors, with incorporation or reduction of molecular oxygen, another compound as one donor, and incorporation of one atom of oxygen, copper ion binding, oxidation-reduction process, oxidoreductase activity, metal ion binding	tyr-4	41.8259	SRAE_1000292900	71.3376	SPAL_0001108700	58.811	SVE_0158200	52.8662
SSTP_0000509500	PC2	0.032	A0A0K0E6G4		NA	NA
SSTP_0000506500	PC2	0.032	A0A0K0E6D4		NA	NA
SSTP_0000648000	PC2	0.032	A0A0K0EAF6		EGF-like_dom, TIL_dom, Ser_inhib-like_sf	membrane, integral component of membrane			SRAE_2000522500	12.7854	SPAL_0000413700	14.3836	SVE_0703100	12.1005
SSTP_0000677900	PC2	0.032	A0A0K0EBA7		NA	NA
SSTP_0000506700	PC2	0.032	A0A0K0E6D6		NA	NA
SSTP_0000270800	PC2	0.032	A0A0K0DZP6		NA	NA
SSTP_0001211200	PC2	0.031	A0A0K0ERN2		NA	NA
SSTP_0000367700	PC2	0.031	A0A0K0E2F7	Metalloendopeptidase	Peptidase_M12A, EGF-like_CS, MetalloPept_cat_dom_sf	metalloendopeptidase activity, metallopeptidase activity, proteolysis, metal ion binding, hydrolase activity, peptidase activity					SPAL_0001227400	47.2296	SVE_1185400	47.4934
SSTP_0000641000	PC2	0.031	A0A0K0EA82		NA	NA
SSTP_0001127400	PC2	0.031	A0A0K0EP88		CAP_domain, CAP_sf	NA			SRAE_2000129590	12.5592
SSTP_0000385700	PC2	0.031	A0A0K0E2Y8		NA	NA			SRAE_2000496100	56.7164
SSTP_0001019800	PC2	0.031	A0A0K0EL54		NA	NA
SSTP_0000677700	PC2	0.031	A0A0K0EBA5		NA	NA
SSTP_0000811600	PC2	0.031	A0A0K0EF53		NA	NA
SSTP_0000805200	PC2	0.031	A0A0K0EEY8		NA	NA
SSTP_0000111300	PC2	0.03	A0A0K0DV45	Metalloendopeptidase	CUB_dom, Peptidase_M12A, Peptidase_Metallo, MetalloPept_cat_dom_sf, Sperma_CUB_dom_sf	metalloendopeptidase activity, metallopeptidase activity, proteolysis, zinc ion binding, metal ion binding, hydrolase activity, peptidase activity			SRAE_2000469400	78.7724
SSTP_0000120600	PC2	0.03	A0A0K0DVE0		A-crystallin/Hsp20_dom, HSP20-like_chaperone	NA			SRAE_2000181500	86.7924	SPAL_0001023000	90.566	SVE_0501700	88.6792
SSTP_0000829300	PC2	0.03	A0A0K0EFN2		CAP_domain, CAP_sf	NA			SRAE_2000129590	22.3744
SSTP_0000953600	PC2	0.03	A0A0K0EJ87		NA	NA
SSTP_0000120700	PC2	0.03	A0A0K0DVE1		A-crystallin/Hsp20_dom, HSP20-like_chaperone	NA			SRAE_2000181400	78.2051	SPAL_0001022900	80.7692	SVE_0501800	81.4103
SSTP_0000492200	PC2	0.03	A0A0K0E5Y8		NA	NA
SSTP_0000677600	PC2	0.03	A0A0K0EBA4		NA	NA
SSTP_0001110400	PC2	0.03	A0A0K0ENR7		CRISP-related, CAP_domain, CAP_sf	NA	F09B9.5	18.1435	SRAE_2000478500	54.4304
SSTP_0000946600	PC2	0.03	A0A0K0EJ15		NA	NA
SSTP_0001117200	PC2	0.029	A0A0K0ENY5		DUF273	NA	F25H2.7	15	SRAE_2000448800	34.2188	SPAL_0001303400	14.375	SVE_0761800	31.25
SSTP_0000110200	PC2	0.029	A0A0K0DV35		TIMP, TIMP-like_OB-fold	metalloendopeptidase inhibitor activity, negative regulation of endopeptidase activity			SRAE_2000408000	44.1718	SPAL_0001316300	42.3313	SVE_0676200	42.3313
SSTP_0000958900	PC2	0.029	A0A0K0EJE3		NA	NA			SRAE_0000003200	42.3197	SPAL_0001752000	34.7962
SSTP_0000844200	PC2	0.029	A0A0K0EG34		NA	NA
SSTP_0000506800	PC2	0.029	A0A0K0E6D7		NA	NA
SSTP_0000641100	PC2	0.029	A0A0K0EA83		NA	NA
SSTP_0001040300	PC2	0.029	A0A0K0ELR2		NA	NA
SSTP_0000671400	PC2	0.029	A0A0K0EB42		NA	NA
SSTP_0000946500	PC2	0.029	A0A0K0EJ14		NA	NA
SSTP_0000355700	PC2	0.029	A0A0K0E236		NA	NA			SRAE_2000429200	72.2222			SVE_0213100	65.7407
SSTP_0000254500	PC2	0.028	A0A0K0DZ80		NA	NA			SRAE_2000435900	34.4828
SSTP_0000805100	PC2	0.028	A0A0K0EEY7		NA	NA
SSTP_0000668100	PC2	0.028	A0A0K0EB10		TIL_dom, Ser_inhib-like_sf	NA			SRAE_0000077300	9.86111	SPAL_0000620600	14.3056	SVE_0668100	14.8611
SSTP_0001108400	PC2	0.028	A0A0K0ENP7		NA	membrane, integral component of membrane
SSTP_0000609000	PC2	0.028	A0A0K0E9A6		NA	NA
SSTP_0001185900	PC2	0.028	A0A0K0EQX8		TIL_dom, Ser_inhib-like_sf	NA			SRAE_1000260200	63.2787	SPAL_0000171500	33.7705
SSTP_0000165100	PC2	0.028	A0A0K0DWN4		NA	NA
SSTP_0000255100	PC2	0.028	A0A0K0DZ86		NA	NA			SRAE_2000435900	36.5517
SSTP_0000538800	PC2	0.028	A0A0K0E7B2		NA	membrane, integral component of membrane			SRAE_2000460700	36.1779
SSTP_0000512000	PC2	0.028	A0A0K0E6J1		CRISP-related, CAP_domain, Allrgn_V5/Tpx1_CS, SCP_GAPR1-like, CAP_sf	extracellular region, membrane, integral component of membrane	F09B9.5	11.2637	SRAE_0000045600	25.5494			SVE_0646900	20.0549
SSTP_0000164300	PC2	0.027	A0A0K0DWM6	Metalloendopeptidase	Peptidase_M12A, Peptidase_Metallo, MetalloPept_cat_dom_sf	metalloendopeptidase activity, metallopeptidase activity, proteolysis, zinc ion binding, metal ion binding, hydrolase activity, peptidase activity			SRAE_2000490500	67.1018	SPAL_0000973300	37.0757
SSTP_0000528300	PC2	0.027	A0A0K0E707		Peptidase_M13, Peptidase_M13_C, MetalloPept_cat_dom_sf, Peptidase_M13_dom_2	metalloendopeptidase activity, metallopeptidase activity, proteolysis			SRAE_1000059800	56.875	SPAL_0001644400	42.5	SVE_0005200	37.7083
SSTP_0001102600	PC2	0.027	A0A0K0ENI9		NA	NA
SSTP_0000030700	PC2	0.027	A0A0K0DSU3		NA	membrane, integral component of membrane							SVE_0159900	67.9245
SSTP_0000378100	PC2	0.027	A0A0K0E2R2		NA	NA
SSTP_0000639800	PC2	0.027	A0A0K0EA70		WH-like_DNA-bd_sf	NA					SPAL_0000523600	44.6809
SSTP_0000871700	PC2	0.027	A0A0K0EGV7	Zinc metalloproteinase	Peptidase_M12A, Peptidase_Metallo, EGF-like_CS, Metallopeptidase_nem, MetalloPept_cat_dom_sf, Astacin-like_dom, Sperma_CUB_dom_sf	molting cycle, collagen and cuticulin-based cuticle, metalloendopeptidase activity, metallopeptidase activity, proteolysis, zinc ion binding, metal ion binding, hydrolase activity, peptidase activity, extracellular region			SRAE_X000009610	50.2451	SPAL_0000113100	50	SVE_1567800	50.7353
SSTP_0000711700	PC2	0.027	A0A0K0ECA0		NA	NA
SSTP_0000975950	PC2	0.027	A0A0K0EJW9		NA	membrane, integral component of membrane
SSTP_0000422300	PC2	0.027	A0A0K0E406	Zinc metalloproteinase	CUB_dom, Peptidase_M12A, Peptidase_Metallo, Metallopeptidase_nem, MetalloPept_cat_dom_sf, Astacin-like_dom, Sperma_CUB_dom_sf	molting cycle, collagen and cuticulin-based cuticle, metalloendopeptidase activity, metallopeptidase activity, proteolysis, zinc ion binding, metal ion binding, hydrolase activity, peptidase activity, extracellular region					SPAL_0000729850	23.822	SVE_0065400	30.3665
SSTP_0000030800	PC2	0.027	A0A0K0DSU4		NA	membrane, integral component of membrane			SRAE_1000332700	50.7692	SPAL_0000716600	46.1538	SVE_0159800	47.6923
SSTP_0000684000	PC2	0.027	A0A0K0EBH0		Alpha-crystallin/HSP, A-crystallin/Hsp20_dom, HSP20-like_chaperone	NA			SRAE_2000507900	52.795	SPAL_0000981500	42.236
SSTP_0000963900	PC2	0.027	A0A0K0EJJ3		CarbesteraseB, AB_hydrolase	NA					SPAL_0000136300	41.0562	SVE_0390800	37.6491
SSTP_0000671200	PC2	0.027	A0A0K0EB40		NA	NA
SSTP_0001040600	PC2	0.027	A0A0K0ELR5		NA	NA
SSTP_0000422000	PC2	0.026	A0A0K0E403	Zinc metalloproteinase	CUB_dom, Peptidase_M12A, Peptidase_Metallo, Metallopeptidase_nem, MetalloPept_cat_dom_sf, Astacin-like_dom, Sperma_CUB_dom_sf	molting cycle, collagen and cuticulin-based cuticle, metalloendopeptidase activity, metallopeptidase activity, proteolysis, zinc ion binding, metal ion binding, hydrolase activity, peptidase activity, extracellular region					SPAL_0000730300	46.7532	SVE_0065300	50.3896
SSTP_0000254000	PC2	0.026	A0A0K0DZ75		NA	NA
SSTP_0000866000	PC2	0.026	A0A0K0EGP9	Metalloendopeptidase	CUB_dom, Peptidase_M12A, EGF-like_CS, MetalloPept_cat_dom_sf, Sperma_CUB_dom_sf	metalloendopeptidase activity, metallopeptidase activity, proteolysis, metal ion binding, hydrolase activity, peptidase activity			SRAE_X000143800	66.0574			SVE_1152800	42.2976
SSTP_0001026600	PC2	0.026	A0A0K0ELC3		NA	NA			SRAE_X000239600	42.4893
SSTP_0000531600	PC2	0.026	A0A0K0E740		ShKT_dom	NA			SRAE_X000247300	26.3063
SSTP_0000805000	PC2	0.026	A0A0K0EEY6	Carboxylic ester hydrolase	Cholinesterase, CarbesteraseB, Carboxylesterase_B_AS, AB_hydrolase	cholinesterase activity, hydrolase activity			SRAE_2000070700	57.2917	SPAL_0001229500	45.1389	SVE_1473400	30.3819
SSTP_0000639900	PC2	0.026	A0A0K0EA71	Hyaluronidase	Aldolase_TIM, Glycoside_hydrolase_SF, Hyaluronidase	hyalurononglucosaminidase activity, carbohydrate metabolic process, catalytic activity, metabolic process, hydrolase activity, hydrolase activity, acting on glycosyl bonds, membrane, integral component of membrane	chhy-1	24.4395	SRAE_X000016500	40.583	SPAL_0001184900	35.2018
SSTP_0000511900	PC2	0.026	A0A0K0E6J0		CRISP-related, CAP_domain, Allrgn_V5/Tpx1_CS, SCP_GAPR1-like, CAP_sf	extracellular region, membrane, integral component of membrane	F09B9.5	10.1983	SRAE_0000045600	28.8952			SVE_0646900	20.9632
SSTP_0000216700	PC2	0.026	A0A0K0DY53		NA	NA							SVE_1632400	82.7273
SSTP_0000004000	PC2	0.026	A0A0K0DS26		CUB_dom, Peptidase_M12A, Peptidase_Metallo, EGF-like_CS, MetalloPept_cat_dom_sf, Sperma_CUB_dom_sf	metalloendopeptidase activity, metallopeptidase activity, proteolysis, zinc ion binding, metal ion binding, hydrolase activity, peptidase activity			SRAE_X000012300	50.1305	SPAL_0000973300	33.1593
SSTP_0000032300	PC2	0.026	A0A0K0DSW0		NA	NA
SSTP_0000668200	PC2	0.026	A0A0K0EB11		Peptidase_S9, Peptidase_S9A, Pept_S9_AS, Pept_S9A_N, AB_hydrolase	serine-type exopeptidase activity, serine-type peptidase activity, serine-type endopeptidase activity, proteolysis			SRAE_X000065700	69.1799
SSTP_0000810100	PC2	0.026	A0A0K0EF36		NA	NA			SRAE_X000082700	11.1307
SSTP_0000829400	PC2	0.026	A0A0K0EFN3		NA	NA
SSTP_0000528200	PC2	0.026			NA	NA			SRAE_1000059700	33.7349	SPAL_0001644500	23.7952	SVE_0005100	18.5241
SSTP_0001102000	PC2	0.026	A0A0K0ENI3		NA	membrane, integral component of membrane			SRAE_1000107200	61.0465	SPAL_0000898500	15.9884	SVE_0778600	31.686
SSTP_0000511800	PC2	0.025	A0A0K0E6I9		CRISP-related, CAP_domain, Allrgn_V5/Tpx1_CS, SCP_GAPR1-like, CAP_sf	extracellular region	F09B9.5	15.2941	SRAE_0000045600	41.1765			SVE_1708300	50.9804
SSTP_0000674700	PC2	0.025	A0A0K0EB76		Peptidase_S9, Peptidase_S9A, Pept_S9A_N, AB_hydrolase	serine-type exopeptidase activity, serine-type peptidase activity, serine-type endopeptidase activity, proteolysis			SRAE_X000014000	54.0888	SPAL_0001558900	41.5888	SVE_1576100	40.6542
SSTP_0000671100	PC2	0.025			NA	NA			SRAE_X000061300	62.2074	SPAL_0000325200	58.0268	SVE_1439900	51.0033
SSTP_0000677500	PC2	0.025	A0A0K0EBA3		NA	NA
SSTP_0000110400	PC2	0.025			NA	NA			SRAE_2000407900	50	SPAL_0001316600	45	SVE_0676500	45
SSTP_0000685200	PC2	0.025	A0A0K0EBI1		NA	NA
SSTP_0001103200	PC2	0.025	A0A0K0ENJ5		NA	NA
SSTP_0000648500	PC2	0.025			NA	NA			SRAE_2000523100	48.3568	SPAL_0000606200	42.723	SVE_1566200	50.7042
SSTP_0001067500	PC2	0.025	A0A0K0EMI6		AA_transpt_TM	membrane, integral component of membrane			SRAE_1000127500	77.5391	SPAL_0000831600	74.6094
SSTP_0000254400	PC2	0.025	A0A0K0DZ79		NA	membrane, integral component of membrane			SRAE_2000435900	27.0833
SSTP_0000705700	PC2	0.025	A0A0K0EC49		CRISP-related, V5_allergen-like, CAP_domain, Allrgn_V5/Tpx1_CS, SCP_GAPR1-like, CAP_sf	extracellular region	scl-12	14.9466	SRAE_2000455200	44.1281
SSTP_0000384700	PC2	0.025	A0A0K0E2X8		NA	NA			SRAE_2000456800	54.3046	SPAL_0000370500	40.3974	SVE_1711700	40.3974
SSTP_0000676100	PC2	0.024	A0A0K0EB90		Ets_dom, WH-like_DNA-bd_sf, WH_DNA-bd_sf	sequence-specific DNA binding, DNA-binding transcription factor activity, regulation of transcription, DNA-templated, nucleus, DNA binding			SRAE_X000220100	72.4289	SPAL_0000661600	59.081	SVE_0846700	60.6127
SSTP_0001047400	PC2	0.024	A0A0K0ELY6		Cation_efflux, Cation_efflux_TMD_sf, Cation_efflux_CTD_sf	cation transport, cation transmembrane transporter activity, transmembrane transport, integral component of membrane, membrane, cation transmembrane transport	ZK185.5	26.3014	SRAE_1000111100	76.7123	SPAL_0001507200	75.0685	SVE_0205000	69.3151
SSTP_0001076300	PC2	0.024	A0A0K0EMS2		NA	NA
SSTP_0000843900	PC2	0.024	A0A0K0EG31		CRISP-related, CAP_domain, CAP_sf	NA			SRAE_2000129590	28.9256
SSTP_0000722800	PC2	0.024	A0A0K0ECL3		Alpha-crystallin/HSP, A-crystallin/Hsp20_dom, HSP20-like_chaperone	NA	hsp-12.3	22.0779	SRAE_2000097200	65.5844	SPAL_0000770200	68.8312	SVE_0449700	79.8701
SSTP_0000731800	PC2	0.024	A0A0K0ECV2		Ground-like_dom	NA			SRAE_0000015200	67.2222	SPAL_0001233400	48.8889	SVE_0753600	57.2222
SSTP_0000421700	PC2	0.024	A0A0K0E3Z9	Metalloendopeptidase	Peptidase_M12A, Peptidase_Metallo, MetalloPept_cat_dom_sf, Sperma_CUB_dom_sf	metalloendopeptidase activity, metallopeptidase activity, proteolysis, zinc ion binding, metal ion binding, hydrolase activity, membrane, integral component of membrane, peptidase activity			SRAE_2000453900	53.1328	SPAL_0000629300	40.3509
SSTP_0000254700	PC2	0.024	A0A0K0DZ82		NA	NA			SRAE_2000435900	32.5581
SSTP_0000961900	PC2	0.024	A0A0K0EJH3	Metalloendopeptidase	Peptidase_M12A, Peptidase_Metallo, MetalloPept_cat_dom_sf	metalloendopeptidase activity, metallopeptidase activity, proteolysis, zinc ion binding, metal ion binding, hydrolase activity, membrane, integral component of membrane, peptidase activity			SRAE_2000453900	54.0943	SPAL_0000629300	41.9355
SSTP_0000000600	PC2	0.024	A0A0K0DRY6		TIL_dom, Ser_inhib-like_sf	NA			SRAE_2000522500	21.9298	SPAL_0000413700	25.8772	SVE_0703100	22.3684
SSTP_0000516300	PC2	0.023	A0A0K0E6N4		ShKT_dom	NA			SRAE_2000198800	45.1923	SPAL_0001038100	45.1923	SVE_0550600	48.0769
SSTP_0001221800	PC2	0.023	A0A0K0ERY8		Transthyretin-like	extracellular space
SSTP_0001218000	PC2	0.023	A0A0K0ERV0		NA	membrane, integral component of membrane			SRAE_1000299700	48.2412			SVE_0050200	31.1558
SSTP_0000495900	PC2	0.023	A0A0K0E628		Transthyretin-like	extracellular space
SSTP_0000087100	PC2	0.023	A0A0K0DUF8		Peptidase_S9, Peptidase_S9A, Pept_S9A_N, AB_hydrolase	serine-type exopeptidase activity, serine-type peptidase activity, serine-type endopeptidase activity, proteolysis			SRAE_2000398800	71.5288	SPAL_0000431900	62.5526	SVE_0287200	61.9916
SSTP_0000679000	PC2	0.023	A0A0K0EBB9		NA	membrane, integral component of membrane			SRAE_X000089400	49.4949	SPAL_0001662500	52.5253	SVE_0127500	50.5051
SSTP_0000685600	PC2	0.023	A0A0K0EBI5		NA	NA
SSTP_0000609100	PC2	0.023	A0A0K0E9A7		NA	NA
SSTP_0000959500	PC2	0.023	A0A0K0EJE9		NA	NA
SSTP_0000532000	PC2	0.023	A0A0K0E744		SSD, Ptc/Disp	integral component of membrane, membrane	ptr-13	32.0366	SRAE_X000247700	86.9565	SPAL_0001343300	76.659	SVE_0888900	74.714
SSTP_0000640500	PC2	0.023	A0A0K0EA77		Apyrase, Apyrase_sf	nucleoside-diphosphatase activity, calcium ion binding, membrane, integral component of membrane	ZK563.7	29.8969	SRAE_X000017200	70.1031	SPAL_0000057400	62.6289	SVE_0841900	62.1134
SSTP_0000497000	PC2	0.023	A0A0K0E639		Nucl_hrmn_rcpt_lig-bd, Znf_hrmn_rcpt, Znf_NHR/GATA, NHR-like_dom_sf	sequence-specific DNA binding, DNA-binding transcription factor activity, regulation of transcription, DNA-templated, nucleus, zinc ion binding, metal ion binding, DNA binding	nhr-66	32.783	SRAE_X000092900	84.434	SPAL_0001662400	66.7453	SVE_0127400	66.7453
SSTP_0000261300	PC2	0.023	A0A0K0DZE9		CRISP-related, CAP_domain, Allrgn_V5/Tpx1_CS, SCP_GAPR1-like, CAP_sf	extracellular region	F09B9.5	27.1186
SSTP_0000608900	PC2	0.023	A0A0K0E9A5		NA	membrane, integral component of membrane
SSTP_0000382100	PC2	0.023	A0A0K0E2V2	Zinc metalloproteinase	Peptidase_M12A, Peptidase_Metallo, EGF-like_CS, Metallopeptidase_nem, Astacin-like_dom, Sperma_CUB_dom_sf	molting cycle, collagen and cuticulin-based cuticle, metalloendopeptidase activity, metallopeptidase activity, proteolysis, zinc ion binding, extracellular region			SRAE_2000460300	54.9569	SPAL_0001538600	40.9483	SVE_0603200	46.1207
SSTP_0001123800	PC2	0.022	A0A0K0EP51		NA	NA			SRAE_X000258600	46.9799	SPAL_0001567600	46.3087	SVE_0600000	56.3758
SSTP_0000683700	PC2	0.022	A0A0K0EBG6		NA	membrane, integral component of membrane			SRAE_2000478610	52.1429	SPAL_0000670000	48.5714	SVE_1183700	49.2857
SSTP_0000275100	PC2	0.022	A0A0K0DZU0		NA	NA
SSTP_0000517100	PC2	0.022	A0A0K0E6P2		NA	NA			SRAE_2000199600	78.8321	SPAL_0001614000	70.438	SVE_0551500	64.2336
SSTP_0000677100	PC2	0.022	A0A0K0EB99		NA	NA
SSTP_0000373900	PC2	0.022	A0A0K0E2M0		NA	NA	T27F6.8	20.8672			SPAL_0001032700	69.1057	SVE_0491600	73.1707
SSTP_0000985900	PC2	0.022	A0A0K0EK67		NA	NA			SRAE_0000050500	46.3768
SSTP_0000961800	PC2	0.022	A0A0K0EJH2	Metalloendopeptidase	Peptidase_M12A, Peptidase_Metallo, MetalloPept_cat_dom_sf, Sperma_CUB_dom_sf	metalloendopeptidase activity, metallopeptidase activity, proteolysis, zinc ion binding, metal ion binding, hydrolase activity, peptidase activity			SRAE_2000453900	54.4081	SPAL_0000629300	44.3325
SSTP_0001127700	PC2	0.022	A0A0K0EP91	Zinc metalloproteinase	Peptidase_M12A, Peptidase_Metallo, Metallopeptidase_nem, Astacin-like_dom	molting cycle, collagen and cuticulin-based cuticle, metalloendopeptidase activity, metallopeptidase activity, proteolysis, zinc ion binding, extracellular region	nas-31	28.6316	SRAE_0000048100	66.9474	SPAL_0001083300	53.0526	SVE_0675100	39.1579
SSTP_0000641600	PC2	0.022	A0A0K0EA88		NA	NA
SSTP_0000508600	PC2	0.022	A0A0K0E6F5		NA	membrane, integral component of membrane			SRAE_X000179800	15.9794	SPAL_0000134800	21.9072	SVE_1654800	4.89691
SSTP_0000946700	PC2	0.022	A0A0K0EJ16		NA	NA
SSTP_0000684100	PC2	0.022	A0A0K0EBH1		Alpha-crystallin/HSP, A-crystallin/Hsp20_dom, HSP20-like_chaperone	metal ion binding	hsp-17	40.5229	SRAE_2000508400	90.1961	SPAL_0000981600	81.0458	SVE_1573900	80.3922
SSTP_0000671300	PC2	0.022	A0A0K0EB41		NA	NA
SSTP_0000852100	PC2	0.022	A0A0K0EGB1		CRISP-related, CAP_domain, CAP_sf	NA			SRAE_2000129590	37.6426
SSTP_0000254800	PC2	0.022	A0A0K0DZ83		NA	NA			SRAE_2000435900	37.2414
SSTP_0000385600	PC2	0.022	A0A0K0E2Y7		ShKT_dom, CC_domain	NA			SRAE_2000496000	49.0446	SPAL_0001047800	33.758	SVE_0594100	49.6815
SSTP_0000541900	PC2	0.022	A0A0K0E7E2		NA	NA			SRAE_1000163100	83.6364	SPAL_0000932700	70	SVE_1061300	70.9091
SSTP_0001026400	PC2	0.022	A0A0K0ELC1		NA	NA			SRAE_X000239600	36.3265
SSTP_0000749500	PC2	0.022	A0A0K0EDD2		NA	NA			SRAE_2000297700	68.6916	SPAL_0000312100	38.3178	SVE_1588200	48.1308
SSTP_0000756500	PC2	0.022	A0A0K0EDK3		Gp-FAR-1	lipid binding			SRAE_2000289400	82.7778	SPAL_0000883700	82.7778	SVE_0559000	81.6667
SSTP_0000518650	PC2	0.022	A0A0K0E6Q9		NA	NA			SRAE_2000067250	76.5152	SPAL_0001679300	59.8485	SVE_1808800	56.0606
SSTP_0000365600	PC2	0.022	A0A0K0E2D6		NA	NA			SRAE_2000451400	53.0435	SPAL_0000443300	10.8696
SSTP_0000228800	PC2	0.022	A0A0K0DYH2	Metalloendopeptidase	CUB_dom, Peptidase_M12A, Peptidase_Metallo, EGF-like_CS, MetalloPept_cat_dom_sf, Sperma_CUB_dom_sf	metalloendopeptidase activity, metallopeptidase activity, proteolysis, zinc ion binding, metal ion binding, hydrolase activity, peptidase activity	hch-1	26.3959	SRAE_2000357800	57.1066	SPAL_0001054700	53.2995
SSTP_0000610400	PC2	0.022	A0A0K0E9C1		NA	NA
SSTP_0001147100	PC2	0.022	A0A0K0EPT9		NA	NA			SRAE_1000093200	87.6786	SPAL_0001696900	80.8929	SVE_0024600	80.3571
SSTP_0000389800	PC2	0.022	A0A0K0E327		NA	membrane, integral component of membrane			SRAE_2000072700	82.4176	SPAL_0001549500	61.5385	SVE_1861300	60.989
SSTP_0000030900	PC2	0.022	A0A0K0DSU5		Prot_kinase_dom, Ser/Thr_kinase_AS, Kinase-like_dom_sf	protein phosphorylation, protein kinase activity, ATP binding			SRAE_2000150700	69.4051	SPAL_0000910900	48.1586
SSTP_0000164900	PC2	0.022	A0A0K0DWN2		Glyco_transf_92	membrane, integral component of membrane					SPAL_0000361800	18.5111
SSTP_0001019500	PC2	0.022	A0A0K0EL51		NA	NA					SPAL_0000599500	28.3133	SVE_1710500	29.5181
SSTP_0001103600	PC2	0.022	A0A0K0ENJ9		CRISP-related, CAP_domain, CAP_sf	NA			SRAE_2000457510	63.9004	SPAL_0000493600	7.88382	SVE_0398300	29.8755
SSTP_0000113700	PC2	0.022	A0A0K0DV69	Metalloendopeptidase	Peptidase_M12A, Peptidase_Metallo, MetalloPept_cat_dom_sf	metalloendopeptidase activity, metallopeptidase activity, proteolysis, zinc ion binding, metal ion binding, hydrolase activity, peptidase activity			SRAE_2000455000	64.7215	SPAL_0000598600	55.1724	SVE_1709500	54.9072
SSTP_0000533000	PC2	0.021	A0A0K0E754		NA	NA			SRAE_X000248600	76.9737	SPAL_0001460600	62.1711	SVE_0889900	63.8158
SSTP_0000638400	PC2	0.021	A0A0K0EA57		NA	NA
SSTP_0000377400	PC2	0.021	A0A0K0E2Q5		Globin-like_sf, Globin/Proto	oxygen binding, heme binding			SRAE_2000406200	79.2285	SPAL_0001318200	67.9525	SVE_1196600	69.4362
SSTP_0001080900	PC2	0.021	A0A0K0EMX1		Netrin_domain, TIMP, TIMP-like_OB-fold	metalloendopeptidase inhibitor activity, protein binding, negative regulation of endopeptidase activity, extracellular region			SRAE_1000084500	85.9873	SPAL_0000038300	77.0701	SVE_0267500	73.8854
SSTP_0000421900	PC2	0.021	A0A0K0E401	Metalloendopeptidase	Peptidase_M12A, Peptidase_Metallo, MetalloPept_cat_dom_sf, Sperma_CUB_dom_sf	metalloendopeptidase activity, metallopeptidase activity, proteolysis, zinc ion binding, metal ion binding, hydrolase activity, peptidase activity			SRAE_2000453900	57.508	SPAL_0000629300	46.6454
SSTP_0000242300	PC2	0.021	A0A0K0DYV7		ShKT_dom	NA			SRAE_2000063800	63.5965	SPAL_0000046100	45.1754
SSTP_0000477100	PC2	0.021	A0A0K0E5I6		7TM_GPCR_serpentine_rcpt_Srt, 7TM_GPCR_serpentine_rcpt_Srx	membrane, integral component of membrane			SRAE_2000423900	79.5455	SPAL_0000321300	71.1039	SVE_1578900	70.4545
SSTP_0000493200	PC2	0.021	A0A0K0E600		NA	NA			SRAE_X000038200	51.6483
SSTP_0001212400	PC2	0.021	A0A0K0ERP4		NA	NA			SRAE_2000507100	34.5679
SSTP_0001266400	PC2	0.021	A0A0K0ET87		CarbesteraseB, AB_hydrolase	membrane, integral component of membrane	F07C4.12	14.1176
SSTP_0000303700	PC2	0.021	A0A0K0E0M4		NA	NA
SSTP_0001198800	PC2	0.021	A0A0K0ERA5		Hsp_70_fam, Heat_shock_70_CS, HSP70_peptide-bd_sf, HSP70_C_sf, BIP_NBD	nucleotide binding, ATP binding, membrane, integral component of membrane	hsp-3	79.003	SRAE_1000022300	93.5045	SPAL_0000171000	91.5408	SVE_0204500	92.5982
SSTP_0000683900	PC2	0.021	A0A0K0EBG9		Alpha-crystallin/HSP, A-crystallin/Hsp20_dom, HSP20-like_chaperone	metal ion binding			SRAE_2000507800	84.3537	SPAL_0000981400	80.2721	SVE_1574000	79.5918
SSTP_0000874400	PC2	0.021	A0A0K0EGY4		DUF273	membrane, integral component of membrane	F25H2.7	29.3963			SPAL_0001474500	65.0919
SSTP_0000382700	PC2	0.021	A0A0K0E2V8	Metalloendopeptidase	Peptidase_M12A, Peptidase_Metallo, MetalloPept_cat_dom_sf	metalloendopeptidase activity, metallopeptidase activity, proteolysis, zinc ion binding, metal ion binding, hydrolase activity, peptidase activity					SPAL_0000966700	17.1642
SSTP_0000985700	PC2	0.021	A0A0K0EK65		Integrase_cat-core, RNaseH-like_sf, RNaseH_sf, Integrase_H2C2	DNA integration, nucleic acid binding							SVE_0196800	9.80392
SSTP_0000612100	PC2	0.021	A0A0K0E9D8		SDR_fam, Sc_DH/Rdtase_CS, NAD(P)-bd_dom_sf	oxidoreductase activity, oxidation-reduction process			SRAE_1000066700	81.2121	SPAL_0000762600	73.0303	SVE_0682800	76.9697
SSTP_0000297000	PC2	0.021	A0A0K0E0F7		F-box_dom, F-box-like_dom_sf	protein binding			SRAE_1000027800	80.9524
SSTP_0001143600	PC2	0.021	A0A0K0EPQ4		NA	NA
SSTP_0000538700	PC2	0.021	A0A0K0E7B1		Glyco_hydro_38_N, Gal_mutarotase_sf_dom, Glyco_hydro/deAcase_b/a-brl, Glyco_hydro_38_C, Glyco_hydro_38_cen, Glyco_hydro_38_N_sf, Glyco_hydro_57/38_cen_sf, Glyco_hydro_38_cen_sf	mannose metabolic process, alpha-mannosidase activity, carbohydrate binding, carbohydrate metabolic process, catalytic activity, membrane, integral component of membrane	aman-2	33.3641	SRAE_2000460600	77.4194	SPAL_0001739400	63.318	SVE_1619300	62.9493
SSTP_0000254600	PC2	0.021	A0A0K0DZ81		NA	membrane, integral component of membrane			SRAE_2000435900	30.3448
SSTP_0000216800	PC2	0.021	A0A0K0DY54		NA	NA			SRAE_2000419800	67.7419	SPAL_0001158600	50.5376	SVE_1632500	50.5376
SSTP_0000706300	PC2	0.021	A0A0K0EC55		Znf_RING/FYVE/PHD	membrane, integral component of membrane	tag-314	20.6718	SRAE_1000355000	83.7209
SSTP_0000015050	PC2	0.021	A0A0K0DSE0		NA	membrane, integral component of membrane							SVE_0489600	64.8649
SSTP_0000517700	PC2	0.021	A0A0K0E6P8		CRISP-related, CAP_domain, CAP_sf	NA			SRAE_2000077100	24.9084	SPAL_0001598200	16.4835
SSTP_0000247300	PC2	0.021	A0A0K0DZ06		NA	NA
SSTP_0000648100	PC2	0.021	A0A0K0EAF7		TIL_dom, Ser_inhib-like_sf	NA			SRAE_2000522500	23.6842	SPAL_0000413700	23.2456	SVE_0703100	20.614
SSTP_0000683600	PC2	0.021	A0A0K0EBG5		Znf_BED	DNA binding			SRAE_2000478700	86.2843	SPAL_0000670100	77.8055	SVE_1183600	77.3067
SSTP_0001259800	PC2	0.021	A0A0K0ET22		DUF273	membrane, integral component of membrane	F25H2.7	25.5376
SSTP_0000466600	PC2	0.02	A0A0K0E582		CRISP-related, CAP_domain, CAP_sf	NA			SRAE_2000129590	24.8869
SSTP_0000608600	PC2	0.02	A0A0K0E9A2		NA	NA
SSTP_0000405700	PC2	0.02	A0A0K0E3I5		Col_cuticle_N	structural constituent of cuticle, membrane, integral component of membrane	col-89	57.0946
SSTP_0001113200	PC2	0.02	A0A0K0ENU5		NA	NA					SPAL_0001242900	66.0377	SVE_0693400	66.6667
SSTP_0001269200	PC2	0.02	A0A0K0ETB4		NA	NA			SRAE_1000008900	67.3228	SPAL_0000253800	65.3543	SVE_0256700	65.748
SSTP_0001110000	PC2	0.02	A0A0K0ENR3		Serralysin-like_metalloprot_C	NA			SRAE_2000515500	34.6412	SPAL_0001169400	17.8627	SVE_0237300	30.9757
SSTP_0000368200	PC2	0.02	A0A0K0E2G2	Metalloendopeptidase	Peptidase_M12A, EGF-like_CS, MetalloPept_cat_dom_sf	metalloendopeptidase activity, metallopeptidase activity, proteolysis, metal ion binding, hydrolase activity, peptidase activity
SSTP_0000672200	PC2	0.02	A0A0K0EB50		NA	NA			SRAE_X000069500	53.4591	SPAL_0000194900	45.283	SVE_0046600	45.283
SSTP_0001211600	PC2	0.02	A0A0K0ERN6		NA	NA			SRAE_2000476300	70.7885	SPAL_0000126500	67.7419	SVE_1654500	66.6667
SSTP_0000696600	PC2	0.02	A0A0K0EBU6		NA	NA
SSTP_0001249000	PC2	0.02	A0A0K0ESR1		Globin-like_sf, Globin/Proto	oxygen binding, heme binding			SRAE_X000115700	94.4444	SPAL_0001710900	81.25	SVE_0715300	79.8611
SSTP_0000391000	PC2	0.02	A0A0K0E339		MetalloPept_cat_dom_sf	metallopeptidase activity, proteolysis			SRAE_2000071900	30.0254	SPAL_0001106000	14.2494	SVE_1208700	19.084
SSTP_0000255200	PC2	0.02	A0A0K0DZ87		NA	NA			SRAE_2000435900	31.8519
SSTP_0000730700	PC2	0.02	A0A0K0ECU2		GPCR_Rhodpsn, GPCR_Rhodpsn_7TM	G protein-coupled receptor signaling pathway, G protein-coupled receptor activity, integral component of membrane, membrane, signal transduction	npr-22	19.2208	SRAE_0000014100	81.2987	SPAL_0000361000	71.4286	SVE_0752200	71.4286
SSTP_0001131800	PC2	0.02	A0A0K0EPD4		Cholinesterase, CarbesteraseB, AB_hydrolase	cholinesterase activity
SSTP_0000299000	PC2	0.02	A0A0K0E0H7		NA	NA					SPAL_0001523600	53.1532	SVE_0005900	51.3514
SSTP_0000164700	PC2	0.02	A0A0K0DWN0		Aspartic_peptidase_A1, Aspartic_peptidase_AS, Peptidase_aspartic_dom_sf, PEPTIDASE_A1, Pepsin-like_dom	aspartic-type endopeptidase activity, proteolysis, hydrolase activity, peptidase activity			SRAE_2000490110	61.3402
SSTP_0000859100	PC2	0.02	A0A0K0EGH9		Col_cuticle_N, Collagen	structural constituent of cuticle, membrane, integral component of membrane	col-173	42.5868			SPAL_0001183900	76.6562	SVE_0106900	75.3943
SSTP_0001186000	PC2	0.02	A0A0K0EQX9		TIL_dom, Ser_inhib-like_sf	NA			SRAE_1000260300	57.8571	SPAL_0000171400	55.7143
SSTP_0000253900	PC2	0.02	A0A0K0DZ74		NA	NA
SSTP_0000748800	PC2	0.02	A0A0K0EDC5	Tubulin beta chain	Tubulin, Beta_tubulin, Tubulin_FtsZ_GTPase, Tub_FtsZ_C, Beta-tubulin_BS, Tubulin_CS, Tubulin/FtsZ_2-layer-sand-dom, Tubulin_C, Tubulin/FtsZ_GTPase_sf, Tubulin/FtsZ_C_sf	structural constituent of cytoskeleton, microtubule, microtubule-based process, GTPase activity, GTP binding, nucleotide binding, cytoplasm, cytoskeleton, cytoskeleton organization	tbb-6	54.1573	SRAE_2000298500	97.5281	SPAL_0000311000	95.7303	SVE_1589300	95.7303
SSTP_0000933000	PC2	0.02	A0A0K0EIM4		NA	NA
SSTP_000217000	PC2	0.02	A0A0K0ETS8		CUB_dom, Peptidase_M12A, EGF-like_CS, MetalloPept_cat_dom_sf, Sperma_CUB_dom_sf	metalloendopeptidase activity, metallopeptidase activity, proteolysis, membrane, integral component of membrane			SRAE_2000420000	55.5556
SSTP_0000942100	PC2	0.02	A0A0K0EIW5		NA	NA			SRAE_2000512200	32.1429
SSTP_0001222100	PC2	0.02	A0A0K0ERZ2		NA	NA
SSTP_0000265500	PC2	0.02	A0A0K0DZJ3		NA	NA			SRAE_X000178600	21.1382	SPAL_0001260500	14.3631	SVE_0825200	22.2222
SSTP_0000478000	PC2	0.02	A0A0K0E5J4		NA	membrane, integral component of membrane			SRAE_2000423000	70.3125
SSTP_0000109300	PC2	0.02	A0A0K0DV26	Metalloendopeptidase	Peptidase_M12A, Peptidase_Metallo, MetalloPept_cat_dom_sf	metalloendopeptidase activity, metallopeptidase activity, proteolysis, zinc ion binding, metal ion binding, hydrolase activity, peptidase activity			SRAE_2000408800	80.7407	SPAL_0001315500	73.0864	SVE_0675400	74.0741
SSTP_0000377000	PC2	0.02	A0A0K0E2Q1		AA-permease/SLC12A_dom, SLC12_C	ion transport, transporter activity, transmembrane transport, membrane, integral component of membrane			SRAE_2000405800	87.8286	SPAL_0000613800	76.3389	SVE_0699100	81.11
SSTP_0000685500	PC2	0.02	A0A0K0EBI4		NA	NA
SSTP_0000693000	PC2	0.02	A0A0K0EBQ9	Superoxide dismutase [Cu-Zn]	SOD_Cu_Zn_dom, SOD_Cu/Zn_BS, SOD_Cu/Zn_/chaperone, SOD-like_Cu/Zn_dom_sf	superoxide dismutase activity, superoxide metabolic process, metal ion binding, oxidation-reduction process, oxidoreductase activity, removal of superoxide radicals			SRAE_2000310200	40.7821	SPAL_0000481600	43.5754	SVE_0905100	50.838
SSTP_0000664400	PC2	0.02	A0A0K0EAW9		Aldo/ket_reductase_CS, Aldo/keto_reductase, NADP_OxRdtase_dom, NADP_OxRdtase_dom_sf	oxidation-reduction process, oxidoreductase activity	C56G3.2	14.377	SRAE_2000432000	83.7061	SPAL_0000943900	77.3163	SVE_0374100	68.0511
SSTP_0000867200	PC2	0.02	A0A0K0EGR0		NA	NA
SSTP_0000396700	PC2	0.02	A0A0K0E395		EF_hand_dom, EF-hand-dom_pair, EF_Hand_1_Ca_BS	calcium ion binding			SRAE_2000238700	88.4615	SPAL_0001199000	87.8205	SVE_0389100	88.4615
SSTP_0000354500	PC2	0.02	A0A0K0E225		NA	NA			SRAE_2000430400	80.2326	SPAL_0000508100	72.093	SVE_0380100	75.5814
SSTP_0000985800	PC2	0.02	A0A0K0EK66		RT_dom, Znf_CCHC, Peptidase_aspartic_dom_sf, Znf_CCHC_sf, RT_RNaseH_2	nucleic acid binding, zinc ion binding					SPAL_0001519700	16.7508	SVE_0736600	17.3562
SSTP_0000857400	PC2	0.02	A0A0K0EGG3		Parkin_co-regulated_protein	NA			SRAE_X000228600	81.362	SPAL_0000844900	71.6846	SVE_0109000	72.043
SSTP_0000110300	PC2	0.02	A0A0K0DV36		Trypsin_dom, Peptidase_S1A, Peptidase_S1_PA	serine-type endopeptidase activity, proteolysis					SPAL_0001316400	56.1688	SVE_0676300	55.1948
SSTP_0000847900	PC2	0.02	A0A0K0EG69		CRISP-related, CAP_domain, CAP_sf	NA			SRAE_2000129590	26.6892
SSTP_0000638300	PC2	0.02	A0A0K0EA56		HTH_ArsR_DNA-bd_dom, WH-like_DNA-bd_sf	DNA-binding transcription factor activity, regulation of transcription, DNA-templated					SPAL_0000616600	37.6963
SSTP_0000443050	PC2	0.02	A0A0K0E4L1		7TM_GPCR_serpentine_rcpt_Srt	membrane, integral component of membrane	srt-43	21.9231	SRAE_X000197650	63.0769
SSTP_0000947600	PC2	0.019	A0A0K0EJ25		NA	NA
SSTP_0000941500	PC2	0.019	A0A0K0EIV9		Glyco_trans_14	acetylglucosaminyltransferase activity, membrane, integral component of membrane	T14B4.9	17.5292	SRAE_2000511800	65.1085	SPAL_0000583900	61.4357	SVE_0251800	61.9366
SSTP_0000734700	PC2	0.019	A0A0K0ECY2		Gp-FAR-1	lipid binding			SRAE_0000018300	81.25	SPAL_0000501700	60.7955	SVE_0239600	61.3636
SSTP_0000441300	PC2	0.019	A0A0K0E4J3		Integrase_cat-core, RNaseH-like_sf, RNaseH_sf, RT_RNaseH_2, Integrase_H2C2	DNA integration, nucleic acid binding							SVE_0196800	7.78098
SSTP_0000383600	PC2	0.019	A0A0K0E2W7		Cholinesterase, CarbesteraseB, AB_hydrolase	cholinesterase activity			SRAE_2000456300	55.615	SPAL_0000599400	54.5455	SVE_1710400	54.5455
SSTP_0000852200	PC2	0.019	A0A0K0EGB2		CAP_domain, CAP_sf	NA			SRAE_2000129590	28.7671
SSTP_0000481700	PC2	0.019	A0A0K0E5M9		NA	NA
SSTP_0000382400	PC2	0.019	A0A0K0E2V5		NA	NA			SRAE_2000482600	43.5484	SPAL_0000606800	43.9516	SVE_1995000	25.8065
SSTP_0000492900	PC2	0.019	A0A0K0E5Z7		NA	membrane, integral component of membrane			SRAE_X000038200	33.75
SSTP_0001103500	PC2	0.019	A0A0K0ENJ8		ShKT_dom	NA			SRAE_2000457600	68.4685
SSTP_0000994150	PC2	0.019	A0A0K0EKE8		NA	membrane, integral component of membrane
SSTP_0000846400	PC2	0.019	A0A0K0EG55		NA	NA			SRAE_X000209400	65.3465	SPAL_0000946800	57.4257
SSTP_0000255000	PC2	0.019	A0A0K0DZ85		NA	NA			SRAE_2000435900	35.1724
SSTP_0000646100	PC2	0.019	A0A0K0EAD6		7TM_GPCR_serpentine_rcpt_Srt	membrane, integral component of membrane			SRAE_2000520750	31.2704	SPAL_0000596150	49.8371	SVE_0352200	25.0814
SSTP_0000942000	PC2	0.019	A0A0K0EIW4	Metalloendopeptidase	Peptidase_M12A, Peptidase_Metallo, MetalloPept_cat_dom_sf	metalloendopeptidase activity, metallopeptidase activity, proteolysis, zinc ion binding, metal ion binding, hydrolase activity, peptidase activity			SRAE_2000453200	26.0309	SPAL_0000129200	10.567	SVE_0395900	16.2371
SSTP_0000411650	PC2	0.019	A0A0K0E3P5		NA	NA
SSTP_0000496900	PC2	0.019	A0A0K0E638		NA	NA			SRAE_X000067300	58.794	SPAL_0001662500	47.2362	SVE_0127500	44.7236
SSTP_0000684500	PC2	0.019	A0A0K0EBH4	Metalloendopeptidase	Peptidase_M12A, EGF-like_CS, MetalloPept_cat_dom_sf, Sperma_CUB_dom_sf	metalloendopeptidase activity, metallopeptidase activity, proteolysis, metal ion binding, hydrolase activity, peptidase activity			SRAE_2000515100	53.8265
SSTP_0000288800	PC2	0.019	A0A0K0E071		NA	membrane, integral component of membrane							SVE_1947200	34.2342
SSTP_0000481300	PC2	0.019	A0A0K0E5M6		NA	NA
SSTP_0000836800	PC2	0.019	A0A0K0EFW1		7TM_GPCR_serpentine_rcpt_Srt	membrane, integral component of membrane			SRAE_1000322800	47.0588	SPAL_0001660500	38.0952	SVE_1947200	37.2549
SSTP_0000505500	PC2	0.019	A0A0K0E6C4		NA	NA
SSTP_0000836900	PC2	0.019	A0A0K0EFW2		NA	membrane, integral component of membrane			SRAE_1000322800	40.884	SPAL_0001660500	32.8729	SVE_1947200	33.1492
SSTP_0000242500	PC2	0.018	A0A0K0DYV9		NA	NA					SPAL_0000592900	60.7477	SVE_1884400	82.243
SSTP_0000386200	PC2	0.018	A0A0K0E2Z3	Metalloendopeptidase	Peptidase_M12A, Peptidase_Metallo, EGF-like_CS, MetalloPept_cat_dom_sf, Astacin-like_dom	metalloendopeptidase activity, metallopeptidase activity, proteolysis, zinc ion binding, metal ion binding, hydrolase activity, peptidase activity					SPAL_0000113000	40.5685	SVE_1567900	40.8269
SSTP_0001226200	PC2	0.018	A0A0K0ES33		NA	NA			SRAE_X000084000	45.5357
SSTP_0000164800	PC2	0.018	A0A0K0DWN1		Aspartic_peptidase_A1, Aspartic_peptidase_AS, Peptidase_aspartic_dom_sf, PEPTIDASE_A1, Pepsin-like_dom	aspartic-type endopeptidase activity, proteolysis, hydrolase activity, peptidase activity			SRAE_2000490110	56.4433
SSTP_0000496000	PC2	0.018	A0A0K0E629		Cholinesterase, CarbesteraseB, AB_hydrolase	cholinesterase activity			SRAE_X000195300	47.5548	SPAL_0000136300	42.8331	SVE_0390800	37.9427
SSTP_0000274500	PC2	0.018	A0A0K0DZT4		TIL_dom, Ser_inhib-like_sf	NA					SPAL_0000620600	29.1667
SSTP_0000643750	PC2	0.018	A0A0K0EAB2		NA	NA
SSTP_0000382600	PC2	0.018	A0A0K0E2V7	Metalloendopeptidase	Peptidase_M12A, Peptidase_Metallo, MetalloPept_cat_dom_sf	metalloendopeptidase activity, metallopeptidase activity, proteolysis, zinc ion binding, metal ion binding, hydrolase activity, peptidase activity			SRAE_2000482400	39.3035	SPAL_0001394900	10.6965
SSTP_0001261400	PC2	0.018	A0A0K0ET38		7TM_GPCR_serpentine_rcpt_Srt, 7TM_GPCR_serpentine_rcpt_Srx	membrane, integral component of membrane					SPAL_0001526300	46.3492	SVE_0008500	46.3492
SSTP_0001217800	PC2	0.018	A0A0K0ERU8	Lipase	AB_hydrolase_1, Lipase_euk, AB_hydrolase	hydrolase activity, acting on ester bonds, hydrolase activity, lipid catabolic process	lipl-4	37.6316	SRAE_1000299500	52.6316	SPAL_0001564000	59.4737	SVE_0218100	27.3684
SSTP_0001017100	PC2	0.018	A0A0K0EL27		NA	membrane, integral component of membrane					SPAL_0001719500	32.7189	SVE_0374200	62.6728
SSTP_0001059600	PC2	0.018	A0A0K0EMA8		NA	NA
SSTP_0000649300	PC2	0.018	A0A0K0EAG8	Metalloendopeptidase	Peptidase_M12A, Peptidase_Metallo, EGF-like_CS, MetalloPept_cat_dom_sf	metalloendopeptidase activity, metallopeptidase activity, proteolysis, zinc ion binding, metal ion binding, hydrolase activity, membrane, integral component of membrane, peptidase activity					SPAL_0001394900	8.54473
SSTP_0000664600	PC2	0.018	A0A0K0EAX1		NA	NA			SRAE_2000515500	30.9979	SPAL_0001169400	24.6285	SVE_0237300	37.5796
SSTP_0001117300	PC2	0.018	A0A0K0ENY6		DUF273	membrane, integral component of membrane	F25H2.7	25.4593	SRAE_2000448800	55.643	SPAL_0001303400	23.3596	SVE_0761800	49.6063
SSTP_0000498700	PC2	0.018	A0A0K0E655		7TM_GPCR_serpentine_rcpt_Srx	membrane, integral component of membrane			SRAE_X000094550	62.5	SPAL_0000105700	38.4615	SVE_0690200	43.9103
SSTP_0000895400	PC2	0.018	A0A0K0EHJ9		Na/ntran_symport, SNS_sf	neurotransmitter:sodium symporter activity, integral component of membrane, membrane, transmembrane transport, neurotransmitter transport, symporter activity	snf-9	30.1829	SRAE_1000331700	80.6402	SPAL_0000895000	77.2866	SVE_1932800	73.3232
SSTP_0000363900	PC2	0.018	A0A0K0E2B7		Alpha-crystallin/HSP, A-crystallin/Hsp20_dom, HSP20-like_chaperone	NA	hsp-17	38.0368			SPAL_0001046300	61.3497
SSTP_0000007000	PC2	0.018	A0A0K0DS62		NA	NA			SRAE_2000515500	32.4106	SPAL_0001169400	24.7982	SVE_0237300	37.8316
SSTP_0000165000	PC2	0.018	A0A0K0DWN3		NA	membrane, integral component of membrane
SSTP_0001144400	PC2	0.018	A0A0K0EPR2		NA	membrane, integral component of membrane
SSTP_0000347200	PC2	0.018	A0A0K0E1V3		NA	NA			SRAE_1000030900	73.913	SPAL_0000387900	62.7329	SVE_1156500	62.1118
SSTP_0001135000	PC2	0.018	A0A0K0EPG6		MIP, MIP_CS, Aquaporin-like, Aquaporin_transptr	channel activity, transmembrane transport, membrane, integral component of membrane	aqp-4	42.8571	SRAE_1000202200	82.9365	SPAL_0001583400	77.7778	SVE_0988400	76.9841
SSTP_0000896200	PC2	0.018	A0A0K0EHK6		MADF-dom, TF_Adf1	NA			SRAE_1000330900	98.4894	SPAL_0000894200	94.2598	SVE_1933500	93.9577
SSTP_0001053300	PC2	0.018	A0A0K0EM45		CAP_sf	NA			SRAE_2000124500	11.7958
SSTP_0000482400	PC2	0.018	A0A0K0E5N6		CAP_sf	NA			SRAE_2000124500	24.7557
SSTP_0001132700	PC2	0.018	A0A0K0EPE3		NA	NA			SRAE_2000448700	38.6861
SSTP_0000688700	PC2	0.018	A0A0K0EBL5		Integrase_cat-core, RNaseH-like_sf, RNaseH_sf, RT_RNaseH_2, Integrase_H2C2	DNA integration, nucleic acid binding							SVE_0196800	8.0597
SSTP_0000456500	PC2	0.018	A0A0K0E4Z7		NA	NA			SRAE_X000140300	41.0072
SSTP_0000482000	PC2	0.018	A0A0K0E5N2		CRISP-related, V5_allergen-like, CAP_domain, Allrgn_V5/Tpx1_CS, SCP_GAPR1-like, CAP_sf	extracellular region	F09B9.5	26.5537
SSTP_0000643800	PC2	0.018	A0A0K0EAB3		NA	NA					SPAL_0000523600	49.2754
SSTP_0000808800	PC2	0.018	A0A0K0EF23		NA	NA
SSTP_0000248900	PC2	0.018	A0A0K0DZ25		NA	membrane, integral component of membrane			SRAE_2000084400	69.4805
SSTP_0000678600	PC2	0.018	A0A0K0EBB4		NA	NA			SRAE_X000099800	81.6794	SPAL_0000100000	71.7557
SSTP_0000366900	PC2	0.018	A0A0K0E2E9		NA	membrane, integral component of membrane			SRAE_2000452400	70.9924	SPAL_0001248900	54.9618
SSTP_0000480100	PC2	0.018	A0A0K0E5L5		CAP_sf	membrane, integral component of membrane			SRAE_2000420700	51.0836			SVE_0885400	26.6254
SSTP_0000661500	PC2	0.018	A0A0K0EAU0		NA	NA			SRAE_X000090300	86.9281	SPAL_0000258700	60.1307	SVE_0224900	61.1111
SSTP_0000411700	PC2	0.018	A0A0K0E3P6		ShKT_dom	NA			SRAE_2000349100	36.3057
SSTP_0000163900	PC2	0.018	A0A0K0DWM2		Fringe-like, C1GALT1	O-glycan processing, glycoprotein-N-acetylgalactosamine 3-beta-galactosyltransferase activity, transferase activity, transferring glycosyl groups, membrane, integral component of membrane					SPAL_0000712300	61.4362	SVE_1705100	34.0426
SSTP_0000385200	PC2	0.018	A0A0K0E2Y3		NA	membrane, integral component of membrane					SPAL_0001048200	23.5669
SSTP_0000520600	PC2	0.018	A0A0K0E6T0		NA	NA			SRAE_2000515500	20.2027	SPAL_0001169400	13.3869	SVE_0237300	22.8941
SSTP_0000584850	PC2	0.018	A0A0K0E8L6		Ground-like_dom	NA	grl-8	31.5068	SRAE_1000133250	80.8219	SPAL_0001086500	80.8219	SVE_0954100	80.8219
SSTP_0001039600	PC2	0.018	A0A0K0ELQ4		NA	NA
SSTP_0000449100	PC2	0.018	A0A0K0E4S1		Serralysin-like_metalloprot_C	NA			SRAE_2000515500	33.1361	SPAL_0001169400	26.3314	SVE_0237300	42.6035
SSTP_0000987400	PC2	0.018	A0A0K0EK80		NA	NA			SRAE_2000515500	31.7003	SPAL_0001169400	22.6225	SVE_0237300	39.049
SSTP_0000953500	PC2	0.018	A0A0K0EJ86		NA	NA			SRAE_2000515600	41.1765
SSTP_0000503100	PC2	0.018	A0A0K0E6A0		NA	NA
SSTP_0000844000	PC2	0.017	A0A0K0EG32		CAP_domain, CAP_sf	NA			SRAE_2000129590	31.1258
SSTP_0000289100	PC2	0.017	A0A0K0E074		Peptidase_S9, Peptidase_S9A, Pept_S9A_N, AB_hydrolase	serine-type exopeptidase activity, serine-type peptidase activity, serine-type endopeptidase activity, proteolysis			SRAE_X000014000	53.2397	SPAL_0001558900	39.2009	SVE_1576100	38.5529
SSTP_0001006200	PC2	0.017	A0A0K0EKS1		NA	NA			SRAE_2000106900	66.113	SPAL_0001008900	54.1528	SVE_0516300	54.8173
SSTP_0000356000	PC2	0.017	A0A0K0E239		CAP_sf	NA			SRAE_2000527300	36.9637	SPAL_0000870000	22.1122	SVE_0899000	34.3234
SSTP_0000455200	PC2	0.017	A0A0K0E4Y3		Transposase_1, Homeobox-like_sf, WH-like_DNA-bd_sf, Mos1_HTH	DNA binding			SRAE_X000208700	23.0089
SSTP_0001132800	PC2	0.017	A0A0K0EPE4		Peptidase_M12A, Peptidase_Metallo	metalloendopeptidase activity, metallopeptidase activity, proteolysis, zinc ion binding, metal ion binding, hydrolase activity, peptidase activity	nas-31	29.5455	SRAE_0000048100	67.803	SPAL_0001083300	59.8485	SVE_0675100	60.2273
SSTP_0000410900	PC2	0.017	A0A0K0E3N7		NA	NA			SRAE_2000348200	73.2673	SPAL_0000460300	68.3168	SVE_1751700	68.3168
SSTP_0000000800	PC2	0.017	A0A0K0DRY8		Integrase_cat-core, RNaseH-like_sf, RNaseH_sf	DNA integration, nucleic acid binding			SRAE_0000055400	14.9584
SSTP_0000425400	PC2	0.017	A0A0K0E435	Serpentine receptor class gamma	7TM_GPCR_serpentine_rcpt_Srg	sensory perception of chemical stimulus, transmembrane signaling receptor activity, membrane, integral component of membrane
SSTP_0000034200	PC2	0.017	A0A0K0DSX9		NA	NA							SVE_0814500	76.4045
SSTP_0000112400	PC2	0.017	A0A0K0DV56		NA	NA							SVE_0571200	60.6383
SSTP_0000957100	PC2	0.017	A0A0K0EJC5		His_Pase_clade-2, His_PPase_superfam, Acid_Pase_AS	NA			SRAE_0000001200	60.75	SPAL_0001749700	50.75	SVE_1103500	46.75
SSTP_0000503800	PC2	0.017	A0A0K0E6A7		NA	membrane, integral component of membrane
SSTP_0000236700	PC2	0.017	A0A0K0DYQ1		GGT_peptidase, Ntn_hydrolases_N	glutathione catabolic process, glutathione hydrolase activity, membrane, integral component of membrane, proteolysis	H14N18.4	47.793	SRAE_2000366000	84.6271	SPAL_0000468800	80.9741	SVE_1760200	80.3653
SSTP_0000683400	PC2	0.017	A0A0K0EBG3		GPCR_Rhodpsn_7TM	integral component of membrane, membrane			SRAE_2000478750	65.4618	SPAL_0000670250	53.8153	SVE_1183400	52.2088
SSTP_0000513800	PC2	0.017	A0A0K0E6K9		NA	membrane, integral component of membrane			SRAE_2000077800	73.0435	SPAL_0000706200	66.087	SVE_1873000	65.2174
SSTP_0000590500	PC2	0.017	A0A0K0E8S3		NA	NA			SRAE_1000129400	47.3684	SPAL_0000630100	30.4094	SVE_0012000	28.0702
SSTP_0000706100	PC2	0.017	A0A0K0EC53		Transposase_1	NA			SRAE_X000208700	39.6825
SSTP_0000120800	PC2	0.017	A0A0K0DVE2		A-crystallin/Hsp20_dom, HSP20-like_chaperone	NA			SRAE_2000181300	77.9412	SPAL_0001022800	68.3824	SVE_0501900	74.2647
SSTP_0001244500	PC2	0.017	A0A0K0ESL5		FMRFamid-related_peptide-like	neuropeptide signaling pathway			SRAE_X000120500	72.7273	SPAL_0001444800	60.9091	SVE_0144300	60
SSTP_0000940100	PC2	0.017	A0A0K0EIU5		Glyco_trans_14	acetylglucosaminyltransferase activity, membrane	T14B4.9	19.3833			SPAL_0000585200	45.3745	SVE_0253100	46.696
SSTP_0000634200	PC2	0.017	A0A0K0EA10		NA	NA			SRAE_1000317500	82.1782			SVE_0399300	50.495
SSTP_0000031200	PC2	0.017	A0A0K0DSU8	Carboxylic ester hydrolase	Cholinesterase, CarbesteraseB, Carboxylesterase_B_AS, AB_hydrolase	cholinesterase activity, hydrolase activity			SRAE_1000291800	71.5548	SPAL_0000716800	61.3074	SVE_0159500	63.0742
SSTP_0000898200	PC2	0.017	A0A0K0EHM8		NA	NA			SRAE_1000268700	27.1084
SSTP_0000020900	PC2	0.017	A0A0K0DSJ7		Hsp90_fam, HATPase_C, Heat_shock_protein_90_CS, Ribosomal_S5_D2-typ_fold, Hsp90_N, HATPase_C_sf, HSP90_C	protein folding, unfolded protein binding, ATP binding	hsp-90	75.5396	SRAE_1000116300	97.6978	SPAL_0001592000	93.9568	SVE_0777600	95.8273
SSTP_0000547500	PC2	0.017	A0A0K0E7J9		NA	NA
SSTP_0000883300	PC2	0.017	A0A0K0EH75		NA	membrane, integral component of membrane			SRAE_X000149400	80.292	SPAL_0001329500	57.6642	SVE_0100900	59.1241
SSTP_0000032100	PC2	0.017	A0A0K0DSV8		NA	NA					SPAL_0001365500	50.2304	SVE_1975000	55.7604
SSTP_0000967000	PC2	0.017	A0A0K0EJM9	Zinc metalloproteinase	CUB_dom, Peptidase_M12A, Peptidase_Metallo, EGF-like_CS, Metallopeptidase_nem, MetalloPept_cat_dom_sf, Astacin-like_dom, Sperma_CUB_dom_sf	molting cycle, collagen and cuticulin-based cuticle, metalloendopeptidase activity, metallopeptidase activity, proteolysis, zinc ion binding, metal ion binding, hydrolase activity, peptidase activity, extracellular region			SRAE_2000073400	44.2455	SPAL_0001230000	43.734
SSTP_0000564300	PC2	0.017	A0A0K0E813		7TM_GPCR_serpentine_rcpt_Str	membrane, integral component of membrane			SRAE_1000292700	32.6027	SPAL_0000937875	37.8082	SVE_0037600	24.9315
SSTP_0000493100	PC2	0.017	A0A0K0E5Z9		Peptidase_M13, Peptidase_M13_C, MetalloPept_cat_dom_sf, Peptidase_M13_dom_2	metalloendopeptidase activity, metallopeptidase activity, proteolysis					SPAL_0001644900	13.3197
SSTP_0000956800	PC2	0.017	A0A0K0EJC2		7TM_GPCR_serpentine_rcpt_Srt	membrane, integral component of membrane	srt-43	26.8939			SPAL_0001749300	59.8485	SVE_1103100	59.4697
SSTP_0000477000	PC2	0.017	A0A0K0E5I5		NA	membrane, integral component of membrane							SVE_1579200	43.8312
SSTP_0000685300	PC2	0.017	A0A0K0EBI2		NA	NA
SSTP_0000843700	PC2	0.017	A0A0K0EG30		NA	NA			SRAE_2000515500	40.7583	SPAL_0001169400	31.7536	SVE_0237300	40.2844
SSTP_0001190900	PC2	0.017	A0A0K0ER27		7TM_GPCR_serpentine_rcpt_Srv	membrane, integral component of membrane			SRAE_1000075200	94.5312	SPAL_0000744100	94.9219	SVE_1021000	94.5312
SSTP_0000638600	PC2	0.017	A0A0K0EA59		NA	NA
SSTP_0000260600	PC2	0.017	A0A0K0DZE1		NA	NA
SSTP_0000505700	PC2	0.017	A0A0K0E6C6		NA	NA
SSTP_0000165300	PC2	0.017	A0A0K0DWN6	Metalloendopeptidase	EGF-like_dom, CUB_dom, Peptidase_M12A, Peptidase_Metallo, EGF-like_CS, MetalloPept_cat_dom_sf, Sperma_CUB_dom_sf	metalloendopeptidase activity, metallopeptidase activity, proteolysis, zinc ion binding, metal ion binding, hydrolase activity, peptidase activity			SRAE_2000528300	74.6835	SPAL_0000615300	63.5443	SVE_0902100	64.8101
SSTP_0000554500	PC2	0.017	A0A0K0E7S0		NA	membrane, integral component of membrane			SRAE_1000280100	79.0274	SPAL_0001764600	62.9179	SVE_0862900	62.31
SSTP_0000808500	PC2	0.017	A0A0K0EF21		CRISP-related, CAP_domain, CAP_sf	NA			SRAE_2000130200	27.8586
SSTP_0000320000	PC2	0.017	A0A0K0E138		AB_hydrolase_3, Arylacetamide_deacetylase, AB_hydrolase	carboxylic ester hydrolase activity, hydrolase activity, integral component of membrane	F16F9.4	36.3636			SPAL_0000165100	81.2834
SSTP_0000910200	PC2	0.017	A0A0K0EHZ7		C-type_lectin-like, C-type_lectin-like/link_sf, CTDL_fold	NA	clec-47	10.6529	SRAE_1000244700	59.1065
SSTP_0000711600	PC2	0.017	A0A0K0EC99		NA	membrane, integral component of membrane
SSTP_0001026500	PC2	0.017	A0A0K0ELC2		Homeobox-like_sf, DUF4817	DNA binding					SPAL_0001151000	25.7218	SVE_1161700	45.4068
SSTP_0001222900	PC2	0.017	A0A0K0ES00		GRAMDC4	apoptotic process, membrane, integral component of membrane			SRAE_X000020500	67.7215	SPAL_0000072400	21.097	SVE_0911300	38.6076
SSTP_0000383300	PC2	0.017	A0A0K0E2W4		Cholinesterase, CarbesteraseB, AB_hydrolase	cholinesterase activity					SPAL_0000599200	55.0877	SVE_1710100	55.614
SSTP_0000665900	PC2	0.017	A0A0K0EAY5		RT_dom, Integrase_cat-core, Znf_CCHC, RNaseH-like_sf, Peptidase_aspartic_dom_sf, RNaseH_sf, RT_RNaseH_2, Integrase_H2C2	DNA integration, nucleic acid binding, zinc ion binding			SRAE_X000200100	7.6494	SPAL_0001250600	54.3426
SSTP_0000985600	PC2	0.017	A0A0K0EK64		Nucl_hrmn_rcpt_lig-bd, Znf_hrmn_rcpt, Znf_NHR/GATA, NHR-like_dom_sf	sequence-specific DNA binding, DNA-binding transcription factor activity, regulation of transcription, DNA-templated, nucleus, zinc ion binding, metal ion binding, DNA binding	nhr-54	20.8134	SRAE_2000427300	24.1627			SVE_0652700	59.3301
SSTP_0001204600	PC2	0.017	A0A0K0ERG6		F-box_dom, LRR_dom_sf, F-box-like_dom_sf	protein binding			SRAE_1000268900	71.5013	SPAL_0000553100	62.8499
SSTP_0000868850	PC2	0.017	A0A0K0EGS8		NA	NA
SSTP_0001129700	PC2	0.017	A0A0K0EPB1	Zinc metalloproteinase	Peptidase_M12A, Peptidase_Metallo, EGF-like_CS, Metallopeptidase_nem, Astacin-like_dom, Sperma_CUB_dom_sf	molting cycle, collagen and cuticulin-based cuticle, metalloendopeptidase activity, metallopeptidase activity, proteolysis, zinc ion binding, extracellular region					SPAL_0001229700	35.5556	SVE_0260400	28.6869
SSTP_0000383800	PC2	0.017	A0A0K0E2W9		Kinase-like_dom_sf, Dhs-27, CHK_kinase-like	NA	C50F4.1	6.57277
SSTP_0000518500	PC2	0.017	A0A0K0E6Q7		Transthyretin-like, Transthyretin-like_sf	extracellular space, membrane, integral component of membrane
SSTP_0000939200	PC2	0.017	A0A0K0EIT6		Cyt_P450, Cyt_P450_E_grp-I, Cyt_P450_CS, Cyt_P450_sf	oxidoreductase activity, acting on paired donors, with incorporation or reduction of molecular oxygen, iron ion binding, heme binding, oxidation-reduction process, metal ion binding, oxidoreductase activity, monooxygenase activity	cyp-14A4	37.1429					SVE_0789900	57.551
SSTP_0000349800	PC2	0.017	A0A0K0E1X9		NA	NA			SRAE_X000160300	84.6939
SSTP_0000705600	PC2	0.017	A0A0K0EC48		CUT_dom, Lambda_DNA-bd_dom_sf	DNA binding					SPAL_0000599100	42.5	SVE_1709700	43.75
SSTP_0001025200	PC2	0.017	A0A0K0ELA9		NA	membrane, integral component of membrane			SRAE_X000241600	72.5714	SPAL_0000377200	79.4286	SVE_0817500	78.8571
SSTP_0001262700	PC2	0.017	A0A0K0ET50		NA	NA
SSTP_0000609150	PC2	0.017	A0A0K0E9A8		NA	NA
SSTP_0001127000	PC2	0.017	A0A0K0EP84		NA	NA
SSTP_0000505400	PC2	0.016	A0A0K0E6C3		NA	NA
SSTP_0001139600	PC2	0.016	A0A0K0EPL0		NA	NA			SRAE_1000220100	52.5547			SVE_0637800	43.7956
SSTP_0000722300	PC2	0.016	A0A0K0ECK8	UDP-glucuronosyltransferase	UDP_glucos_trans, UDP_glycos_trans_CS	transferase activity, transferring hexosyl groups, transferase activity, membrane, integral component of membrane, transferase activity, transferring glycosyl groups, glucuronosyltransferase activity			SRAE_2000096700	74.5731	SPAL_0000207200	29.4118	SVE_0448600	71.7268
SSTP_0000113900	PC2	0.016	A0A0K0DV71		NA	membrane, integral component of membrane			SRAE_2000471650	78.8732			SVE_0341200	64.7887
SSTP_0000906400	PC2	0.016	A0A0K0EHV9		NA	NA
SSTP_0000381900	PC2	0.016	A0A0K0E2V0		7TM_GPCR_serpentine_rcpt_Sre	sensory perception of chemical stimulus, integral component of membrane, membrane			SRAE_2000482900	81.7629	SPAL_0000606300	65.6535	SVE_1566000	66.8693
SSTP_0000944600	PC2	0.016	A0A0K0EIZ3		Globin, Globin-like_sf, Globin/Proto	oxygen binding, heme binding, oxygen carrier activity, oxygen transport			SRAE_1000033600	89.4737	SPAL_0001136600	82.1053	SVE_0773600	81.0526
SSTP_0000963200	PC2	0.016	A0A0K0EJI6		UBQ-conjugat_E2, UBQ-conjugating_enzyme/RWD	NA	ubc-17	44.3131	SRAE_2000426200	94.6824	SPAL_0000441100	88.9217	SVE_0648800	89.0694
SSTP_0000165200	PC2	0.016	A0A0K0DWN5	Zinc metalloproteinase	CUB_dom, Peptidase_M12A, Peptidase_Metallo, EGF-like_CS, Metallopeptidase_nem, Astacin-like_dom, Sperma_CUB_dom_sf	molting cycle, collagen and cuticulin-based cuticle, metalloendopeptidase activity, metallopeptidase activity, proteolysis, zinc ion binding, extracellular region			SRAE_2000528200	66.5281	SPAL_0000399500	46.1538	SVE_1701700	35.7588
SSTP_0001109100	PC2	0.016	A0A0K0ENQ4		NA	NA					SPAL_0001598000	8.78378
SSTP_0000517600	PC2	0.016	A0A0K0E6P7		CRISP-related, CAP_domain, CAP_sf	NA			SRAE_2000077300	36.3958	SPAL_0001689800	16.6078	SVE_1807900	22.6148
SSTP_0000254100	PC2	0.016	A0A0K0DZ76		NA	NA
SSTP_0000875100	PC2	0.016	A0A0K0EGZ1		Tc1-like_DDE_dom	NA					SPAL_0000523600	52.7778
SSTP_0000803900	PC2	0.016	A0A0K0EEX5		NA	membrane, integral component of membrane
SSTP_0000367600	PC2	0.016	A0A0K0E2F6		NA	NA
SSTP_0000049000	PC2	0.016	A0A0K0DTC7		6-blade_b-propeller_TolB-like, PD40	NA			SRAE_2000327100	82.2647	SPAL_0001413700	78.3083
SSTP_0001116700	PC2	0.016	A0A0K0ENY0		K_chnl_dom	membrane, integral component of membrane			SRAE_2000449300	77.0609	SPAL_0000191500	70.2509	SVE_0762600	68.4588
SSTP_0000271400	PC2	0.016	A0A0K0DZQ2		Ankyrin_rpt, Ankyrin_rpt-contain_dom, Ankyrin_rpt-contain_sf	protein binding
SSTP_0000915800	PC2	0.016	A0A0K0EI51		NA	membrane, integral component of membrane			SRAE_1000140900	82.4281	SPAL_0000755600	73.8019	SVE_0971000	74.7604
SSTP_0000381300	PC2	0.016	A0A0K0E2U4		Peptidase_C1A_C, Prot_inhib_I29, Papain-like_cys_pep_sf, Peptidase_C1A_papain-like	cysteine-type peptidase activity, proteolysis			SRAE_0000007700	73.9255	SPAL_0000411200	61.3181	SVE_1569800	62.4642
SSTP_0000955700	PC2	0.016	A0A0K0EJA9	Metalloendopeptidase	Peptidase_M12A, EGF-like_CS, MetalloPept_cat_dom_sf	metalloendopeptidase activity, metallopeptidase activity, proteolysis, metal ion binding, hydrolase activity, peptidase activity					SPAL_0000800800	39.6325	SVE_1575400	37.2703
SSTP_0001129500	PC2	0.016	A0A0K0EPA8		NA	NA
SSTP_0000677800	PC2	0.016	A0A0K0EBA6		NA	NA
SSTP_0000559600	PC2	0.016	A0A0K0E7W7		NA	NA			SRAE_1000270500	59.6639
SSTP_0000929800	PC2	0.016	A0A0K0EIJ3		NA	NA			SRAE_1000154800	65.0485	SPAL_0000156500	54.3689	SVE_1014600	55.3398
SSTP_0000609900	PC2	0.016	A0A0K0E9B6		Znf_RING, Znf_RING/FYVE/PHD, Znf_RING_CS	NA			SRAE_1000346100	88.0435	SPAL_0000951100	84.2391	SVE_0312200	84.2391
SSTP_0001222300	PC2	0.016	A0A0K0ERZ4		Transthyretin-like, Transthyretin-like_sf	extracellular space
SSTP_0000162100	PC2	0.016	A0A0K0DWK3		NA	NA			SRAE_2000492600	65.8354	SPAL_0001246500	53.1172
SSTP_0000604300	PC2	0.016	A0A0K0E959		NA	membrane, integral component of membrane			SRAE_1000312200	70.4403	SPAL_0000955000	52.8302	SVE_0316300	55.0314
SSTP_0001133300	PC2	0.016	A0A0K0EPE9		Transthyretin-like	extracellular space
SSTP_0001266300	PC2	0.016	A0A0K0ET86	Carboxylic ester hydrolase	CarbesteraseB, Carboxylesterase_B_AS, AB_hydrolase	hydrolase activity, membrane, integral component of membrane			SRAE_1000050800	74.8031			SVE_0070000	65.0394
SSTP_0000617300	PC2	0.016	A0A0K0E9J0		Sulfotransferase, Chst-1	positive regulation of response to oxidative stress, chondroitin sulfate biosynthetic process, chondroitin 4-sulfotransferase activity, sulfotransferase activity, integral component of membrane, membrane			SRAE_X000053500	89.557	SPAL_0001324200	73.7342	SVE_0689100	68.9873
SSTP_0001100100	PC2	0.016	A0A0K0ENG4		bZIP	DNA-binding transcription factor activity, regulation of transcription, DNA-templated			SRAE_1000105000	73.5099	SPAL_0000250200	53.6424
SSTP_0000697800	PC2	0.016	A0A0K0EBV8		Sulfotransferase, Chst-1	positive regulation of response to oxidative stress, chondroitin sulfate biosynthetic process, chondroitin 4-sulfotransferase activity, sulfotransferase activity, integral component of membrane			SRAE_2000388900	66.6667			SVE_1123100	69.4969
SSTP_0000089300	PC2	0.016	A0A0K0DUI0		NA	NA
SSTP_0000301200	PC2	0.016	A0A0K0E0K0		NA	NA			SRAE_X000038200	49.7355
SSTP_0001111000	PC2	0.016	A0A0K0ENS3		NA	NA					SPAL_0000126300	45.4545
SSTP_0000034100	PC2	0.016	A0A0K0DSX8		Sushi_SCR_CCP_dom, Beta-lactam-related, NIDO_dom, AMOP_dom, Beta-lactam/transpept-like	cell-matrix adhesion, membrane, integral component of membrane			SRAE_X000138200	16.7639	SPAL_0000380200	15.809	SVE_0814600	15.5968
SSTP_0000803300	PC2	0.016	A0A0K0EEW9		CRISP-related, CAP_domain, CAP_sf	NA					SPAL_0000869600	24.1706	SVE_0898900	24.1706
SSTP_0000164000	PC2	0.016	A0A0K0DWM3		Gp-FAR-1	lipid binding			SRAE_2000490800	78.5276	SPAL_0000410800	63.8037	SVE_1570200	64.4172
SSTP_0000645000	PC2	0.016	A0A0K0EAC5		BTB/POZ_dom, Kelch_1, SKP1/BTB/POZ_sf, Kelch-typ_b-propeller	protein binding			SRAE_2000472800	74.7412
SSTP_0000568100	PC2	0.016	A0A0K0E851		Peptidase_A22A	protein processing, aspartic-type endopeptidase activity, integral component of membrane, membrane			SRAE_1000319700	68.1564	SPAL_0000487900	54.7486	SVE_0170800	48.8827
SSTP_0000256600	PC2	0.016	A0A0K0DZA0		TIL_dom, Ser_inhib-like_sf	NA
SSTP_0000909500	PC2	0.016	A0A0K0EHZ0		SDR_fam, NAD(P)-bd_dom_sf	NA	dhs-17	38.2253	SRAE_1000245400	95.2218	SPAL_0000154700	91.1263	SVE_0963700	91.8089
SSTP_0001275900	PC2	0.016	A0A0K0ETI3		CarbesteraseB, Carboxylesterase_B_CS, AB_hydrolase	NA			SRAE_1000175600	75.0388
SSTP_0000220800	PC2	0.016	A0A0K0DY94		TIMP, TIMP-like_OB-fold	metalloendopeptidase inhibitor activity, negative regulation of endopeptidase activity, extracellular region			SRAE_2000486000	42.4837	SPAL_0001154000	49.6732	SVE_1637700	49.0196
SSTP_0000685400	PC2	0.016	A0A0K0EBI3		NA	NA
SSTP_0000347900	PC2	0.016	A0A0K0E1W0		PGBD, PGBD4_C_Znf-ribbon	NA					SPAL_0000287200	23.4432
SSTP_0000365400	PC2	0.016	A0A0K0E2D4		Ankyrin_rpt, Ankyrin_rpt-contain_dom, TRPV, Ankyrin_rpt-contain_sf	ion transport, ion channel activity, protein binding, integral component of membrane, membrane, ion transmembrane transport	ocr-2	51.2426	SRAE_2000451200	88.1657	SPAL_0000728000	21.1834	SVE_0395200	82.7219
SSTP_0000365900	PC2	0.016	A0A0K0E2D9		Transthyretin-like	extracellular space			SRAE_2000451600	25.0965	SPAL_0001248050	22.7799
SSTP_0000645300	PC2	0.015	A0A0K0EAC8		Ham1p-like, ITPase-like_fam	nucleoside triphosphate catabolic process, nucleoside-triphosphate diphosphatase activity			SRAE_2000473100	93.6975	SPAL_0000595300	87.8151	SVE_0353100	88.2353
SSTP_0000857300	PC2	0.015	A0A0K0EGG2		bHLH_dom, MASH1/Ascl1a-like, HLH_DNA-bd_sf	protein dimerization activity, regulation of transcription by RNA polymerase II, DNA binding			SRAE_X000228700	94.1176	SPAL_0000845000	72.549	SVE_0109100	84.9673
SSTP_0000638500	PC2	0.015	A0A0K0EA58		NA	NA
SSTP_0000524200	PC2	0.015	A0A0K0E6W8		Homeobox-like_sf, WH-like_DNA-bd_sf, Mos1_HTH	DNA binding			SRAE_X000208700	3.20513			SVE_1973600	47.4359
SSTP_0001115000	PC2	0.015	A0A0K0ENW2	Metalloendopeptidase	Peptidase_M12A, Peptidase_Metallo, MetalloPept_cat_dom_sf, Sperma_CUB_dom_sf	metalloendopeptidase activity, metallopeptidase activity, proteolysis, zinc ion binding, metal ion binding, hydrolase activity, peptidase activity			SRAE_2000450700	51.2255	SPAL_0001248100	27.451
SSTP_0000216600	PC2	0.015	A0A0K0DY52		NA	NA			SRAE_2000419600	79.7468	SPAL_0001158800	62.6582	SVE_1632300	64.557
SSTP_0000503900	PC2	0.015	A0A0K0E6A8		NA	NA
SSTP_0001095000	PC2	0.015	A0A0K0ENB3		GPCR_Rhodpsn, GPCR_Rhodpsn_7TM	G protein-coupled receptor signaling pathway, G protein-coupled receptor activity, integral component of membrane, membrane, signal transduction			SRAE_X000080100	93.2515	SPAL_0000053600	82.8221	SVE_0749000	82.8221
SSTP_0000849700	PC2	0.015	A0A0K0EG87		NA	NA			SRAE_X000206000	78.7037	SPAL_0001281500	75.9259
SSTP_0000729100	PC2	0.015	A0A0K0ECS6		DUF1647	NA			SRAE_0000003800	86.7971	SPAL_0001172000	81.6626
SSTP_0000958500	PC2	0.015	A0A0K0EJD9		7TM_GPCR_serpentine_rcpt_Srt	membrane, integral component of membrane	srt-44	28.8401	SRAE_0000002700	58.6207	SPAL_0001751500	54.8589	SVE_1105400	58.6207
SSTP_0000950000	PC2	0.015	A0A0K0EJ49		Ubiquitin_dom, Ribosomal_L40e, Ribosomal_zn-bd, Ubiquitin_CS, Ubiquitin, Ubiquitin-like_domsf, L40e_sf	ribosome, translation, structural constituent of ribosome, protein binding			SRAE_2000464600	82.8125	SPAL_0001429100	98.4375	SVE_0574600	97.6562
SSTP_0000643900	PC2	0.015	A0A0K0EAB4		NA	NA
SSTP_0000920100	PC2	0.015	A0A0K0EI94		His_Pase_clade-2, His_PPase_superfam, Api_m_3	acid phosphatase activity, dephosphorylation					SPAL_0000760200	58.2697
SSTP_0000254300	PC2	0.015	A0A0K0DZ78		NA	NA			SRAE_2000435900	36.0294
SSTP_0000261400	PC2	0.015	A0A0K0DZF0		Transthyretin-like	extracellular space			SRAE_2000436800	24.812	SPAL_0000511832	24.0602	SVE_0579800	33.0827
SSTP_0000491600	PC2	0.015	A0A0K0E5Y1		MFS_sugar_transport-like, MFS_dom, MFS_trans_sf	transmembrane transport, transmembrane transporter activity, integral component of membrane, membrane					SPAL_0000056400	47.2574	SVE_1971700	60.9705
SSTP_0001112600	PC2	0.015	A0A0K0ENT9		NA	membrane, integral component of membrane					SPAL_0000606000	58.3012
SSTP_0001192700	PC2	0.015	A0A0K0ER45		GPCR_Rhodpsn, GPCR_Rhodpsn_7TM	G protein-coupled receptor signaling pathway, G protein-coupled receptor activity, integral component of membrane, membrane	gnrr-6	29.8174	SRAE_1000073400	86.0041	SPAL_0000742200	76.0649	SVE_1023000	76.6734
SSTP_0001019400	PC2	0.015	A0A0K0EL50		Peptidase_S9, Peptidase_S9A, Pept_S9_AS, Pept_S9A_N, AB_hydrolase	serine-type exopeptidase activity, serine-type peptidase activity, serine-type endopeptidase activity, proteolysis			SRAE_2000526700	63.9323	SPAL_0001559000	38.6719
SSTP_0001116800	PC2	0.015	A0A0K0ENY1		2pore_dom_K_chnl, K_chnl_dom	potassium ion transmembrane transport, potassium channel activity, membrane, integral component of membrane, ion transport			SRAE_2000449200	79.8742	SPAL_0000191600	74.8428	SVE_0762500	75.4717
SSTP_0000077200	PC2	0.015	A0A0K0DU58		NA	NA							SVE_1583200	49.2308
SSTP_0001088800	PC2	0.015	A0A0K0EN52		NA	NA			SRAE_X000035400	66.3043			SVE_1979200	55.4348
SSTP_0000511500	PC2	0.015	A0A0K0E6I6		NA	membrane, integral component of membrane			SRAE_2000128200	70.0326	SPAL_0001107400	70.684	SVE_1858100	70.0326
SSTP_0000454700	PC2	0.015	A0A0K0E4X8		NA	membrane, integral component of membrane
SSTP_0001165200	PC2	0.015	A0A0K0EQC3		Frag1/DRAM/Sfk1	membrane, integral component of membrane			SRAE_1000055700	82.397	SPAL_0000539200	62.9213	SVE_0081500	63.2959
SSTP_0000225400	PC2	0.015	A0A0K0DYD9		NA	NA			SRAE_2000353300	62.249	SPAL_0001051300	29.7189	SVE_1773200	58.6345
SSTP_0000303000	PC2	0.015	A0A0K0E0L7		NA	NA			SRAE_X000038200	35.6021
SSTP_0000390800	PC2	0.015	A0A0K0E337		NA	NA
SSTP_0000166800	PC2	0.015	A0A0K0DWQ1		NA	NA			SRAE_0000000300	37.0892
SSTP_0000894500	PC2	0.015	A0A0K0EHJ0		NA	membrane, integral component of membrane			SRAE_1000321500	61.3208	SPAL_0000260300	45.9119	SVE_1944100	44.3396
SSTP_0000647300	PC2	0.015	A0A0K0EAE8		GPCR_Rhodpsn_7TM	integral component of membrane, membrane			SRAE_2000521900	88.7019	SPAL_0000597300	81.4904	SVE_0350800	80.5288
SSTP_0000781200	PC2	0.015	A0A0K0EEA0		NA	NA			SRAE_2000373800	81.6667	SPAL_0001743200	77.5	SVE_0561400	79.1667
SSTP_0000967200	PC2	0.015	A0A0K0EJN1	Metalloendopeptidase	Peptidase_M12A, Peptidase_Metallo, EGF-like_CS, MetalloPept_cat_dom_sf	metalloendopeptidase activity, metallopeptidase activity, proteolysis, zinc ion binding, metal ion binding, hydrolase activity, membrane, integral component of membrane, peptidase activity
SSTP_0001049500	PC2	0.015	A0A0K0EM07		NA	NA			SRAE_1000116000	54.0984	SPAL_0001128300	32.7869	SVE_0031000	32.2404
SSTP_0000870000	PC2	0.015	A0A0K0EGU0		GPCR_Rhodpsn, GPCR_Rhodpsn_7TM	G protein-coupled receptor signaling pathway, G protein-coupled receptor activity, integral component of membrane, membrane, signal transduction	tkr-3	16.75	SRAE_X000007900	88.25	SPAL_0000016300	80.75
SSTP_0000249000	PC2	0.015	A0A0K0DZ26		NA	NA			SRAE_2000084600	46.0177	SPAL_0000780700	43.8053	SVE_0425400	42.9204
SSTP_0000497100	PC2	0.015	A0A0K0E640		NA	NA	ZK1307.1	56.8266	SRAE_X000093000	87.8229	SPAL_0001662300	78.9668	SVE_0127300	79.3358
SSTP_0001017400	PC2	0.015	A0A0K0EL30	Glutamine synthetase	Gln_synth_cat_dom, Gln_synt_b-grasp, Gln_synth/guanido_kin_cat_dom, Gln_synth_N_conserv_site, Gln_synth_gly_rich_site, Gln_synt_N	glutamine biosynthetic process, glutamate-ammonia ligase activity, nitrogen compound metabolic process, catalytic activity, nucleotide binding, ATP binding, ligase activity	gln-3	72.449	SRAE_2000431700	90.051	SPAL_0001716300	89.7959	SVE_0377700	88.2653
SSTP_0000083900	PC2	0.015	A0A0K0DUC6		ShKT_dom	NA			SRAE_2000395300	60.6335	SPAL_0000600500	14.2534	SVE_0280400	42.3077
SSTP_0000861100	PC2	0.015	A0A0K0EGJ9		NA	membrane, integral component of membrane			SRAE_X000038900	75.9777	SPAL_0000534600	67.0391	SVE_0105000	65.0838
SSTP_0000868800	PC2	0.015	A0A0K0EGS7		NA	membrane, integral component of membrane			SRAE_X000007000	52.6316
SSTP_0000823100	PC2	0.015			NA	NA			SRAE_2000257000	79.1209	SPAL_0000995400	79.1209	SVE_0473600	79.1209
SSTP_0001065300	PC2	0.015	A0A0K0EMG4		NA	membrane, integral component of membrane							SVE_0366200	43.5583
SSTP_0001116300	PC2	0.015	A0A0K0ENX6		Ion_trans_dom, TRPM_SLOG	ion transport, ion channel activity, transmembrane transport, membrane, integral component of membrane, ion transmembrane transport			SRAE_2000449700	89.8261	SPAL_0001388800	84.9968	SVE_0764200	84.6748
SSTP_0001109000	PC2	0.015	A0A0K0ENQ3		Sulfotransferase, Chst-1	positive regulation of response to oxidative stress, chondroitin sulfate biosynthetic process, chondroitin 4-sulfotransferase activity, sulfotransferase activity, integral component of membrane, membrane			SRAE_2000461700	71.6776	SPAL_0001558700	65.5773	SVE_0370400	66.6667
SSTP_0000410100	PC2	0.015	A0A0K0E3M9		TGF-b_C, TGF-beta-rel, Cystine-knot_cytokine	growth factor activity, signal transduction, extracellular region			SRAE_2000347400	65.7576	SPAL_0000211600	62.7273	SVE_1750800	62.7273
SSTP_0000265900	PC2	0.015	A0A0K0DZJ7		NA	NA			SRAE_X000178200	69.5652	SPAL_0001260100	57.6087	SVE_0825600	55.4348
SSTP_0000843500	PC2	0.015	A0A0K0EG28		RNaseH-like_sf, RNaseH_sf	nucleic acid binding			SRAE_0000046300	51.5235	SPAL_0001443500	57.0637	SVE_1165200	24.3767
SSTP_0000159500	PC2	0.015	A0A0K0DWH7		Prot_kinase_dom, Ser/Thr_kinase_AS, Kinase-like_dom_sf, Protein_kinase_ATP_BS	protein phosphorylation, protein kinase activity, ATP binding, nucleotide binding, protein serine/threonine kinase activity			SRAE_2000501700	89.3678	SPAL_0000678200	79.5977	SVE_0581500	79.023
SSTP_0000114600	PC2	0.015	A0A0K0DV81	Zinc metalloproteinase	EGF-like_dom, Peptidase_M12A, Peptidase_Metallo, EGF-like_CS, Metallopeptidase_nem, MetalloPept_cat_dom_sf, Astacin-like_dom	molting cycle, collagen and cuticulin-based cuticle, metalloendopeptidase activity, metallopeptidase activity, proteolysis, zinc ion binding, metal ion binding, hydrolase activity, peptidase activity, extracellular region					SPAL_0000410500	34.5133	SVE_1570400	34.0708
SSTP_0000785000	PC2	0.015	A0A0K0EED8		GABAAa_rcpt, GABAA/Glycine_rcpt, Neurotrans-gated_channel_TM, Neur_channel, Neur_chan_lig-bd, Neurotransmitter_ion_chnl_CS, Neuro-gated_channel_TM_sf, Neur_chan_lig-bd_sf	GABA-A receptor activity, extracellular ligand-gated ion channel activity, ion transmembrane transport, ion transport, ion channel activity, transmembrane signaling receptor activity, integral component of membrane, membrane, plasma membrane			SRAE_2000018500	88.3197	SPAL_0001426500	85.6557	SVE_0542000	85.8607
SSTP_0000956900	PC2	0.015	A0A0K0EJC3		NA	NA			SRAE_0000000900	60.7143	SPAL_0001749400	55.3571	SVE_1103200	54.4643
SSTP_0000804000	PC2	0.015	A0A0K0EEX6		NA	NA
SSTP_0000285500	PC2	0.015	A0A0K0E038		NA	NA					SPAL_0000926800	55.9701
SSTP_0001094200	PC2	0.015	A0A0K0ENA5		NA	membrane, integral component of membrane			SRAE_X000080900	77.2277	SPAL_0001598600	66.6667	SVE_0749800	66.6667
SSTP_0000744000	PC2	0.015	A0A0K0ED77		NA	NA			SRAE_2000384000	63.4146	SPAL_0000421600	64.2276	SVE_1643900	57.7236
SSTP_0000784400	PC2	0.015	A0A0K0EED2		Znf_RING, NHR_dom, Znf_RING/FYVE/PHD, Neuralized	NA			SRAE_2000208800	82.1429
SSTP_0000363200	PC2	0.015	A0A0K0E2B0		NA	membrane, integral component of membrane			SRAE_2000474150	71.4286			SVE_1655900	61.1296
SSTP_0000770000	PC2	0.015	A0A0K0EDY6		CRISP-related, V5_allergen-like, CAP_domain, SCP_GAPR1-like, CAP_sf	NA	scl-12	11.3402	SRAE_2000080200	57.0447			SVE_1867100	19.5876
SSTP_0001200100	PC2	0.015	A0A0K0ERB9		Fringe-like	transferase activity, transferring glycosyl groups, membrane	bus-4	27.8107	SRAE_1000010300	82.2485	SPAL_0000401000	64.2012	SVE_0200900	63.9053
SSTP_0000505600	PC2	0.014	A0A0K0E6C5		NA	NA
SSTP_0001069000	PC2	0.014	A0A0K0EMK1		NA	membrane, integral component of membrane			SRAE_1000125900	75	SPAL_0000162600	61.2903
SSTP_0000382500	PC2	0.014	A0A0K0E2V6	Metalloendopeptidase	Peptidase_M12A, Peptidase_Metallo, MetalloPept_cat_dom_sf	metalloendopeptidase activity, metallopeptidase activity, proteolysis, zinc ion binding, metal ion binding, hydrolase activity, peptidase activity
SSTP_0000675000	PC2	0.014	A0A0K0EB79		Fringe-like, C1GALT1	O-glycan processing, glycoprotein-N-acetylgalactosamine 3-beta-galactosyltransferase activity, transferase activity, transferring glycosyl groups, membrane					SPAL_0000712300	60.5422
SSTP_0000167200	PC2	0.014	A0A0K0DWQ5		Sulfotransferase_dom, P-loop_NTPase	sulfotransferase activity	ssu-1	35.9621	SRAE_2000472200	88.959	SPAL_0000594400	87.3817	SVE_0354100	88.959
SSTP_0001110500	PC2	0.014	A0A0K0ENR8		7TM_GPCR_serpentine_rcpt_Str	membrane, integral component of membrane			SRAE_2000507650	64.5646
SSTP_0000407600	PC2	0.014	A0A0K0E3K4		CRISP-related, CAP_domain, CAP_sf	NA	F09B9.5	10.5012			SPAL_0001549100	40.3341	SVE_1860900	42.4821
SSTP_0001103400	PC2	0.014	A0A0K0ENJ7		EGF-like_CS, MetalloPept_cat_dom_sf	metallopeptidase activity, proteolysis			SRAE_2000457710	57.0652	SPAL_0001303100	30.7065	SVE_0346000	41.5761
SSTP_0000120400	PC2	0.014	A0A0K0DVD8		A-crystallin/Hsp20_dom, HSP20-like_chaperone	NA			SRAE_2000181700	91.411	SPAL_0001023200	84.0491	SVE_0501500	83.4356
SSTP_0000628900	PC2	0.014	A0A0K0E9V7		A-crystallin/Hsp20_dom, HSP20-like_chaperone	NA			SRAE_1000191500	92.9348	SPAL_0001512300	84.2391
SSTP_0000245000	PC2	0.014	A0A0K0DYY4		NA	NA			SRAE_X000023200	35.9712
SSTP_0000378000	PC2	0.014	A0A0K0E2R1	Metalloendopeptidase	Peptidase_M12A, Peptidase_Metallo, MetalloPept_cat_dom_sf	metalloendopeptidase activity, metallopeptidase activity, proteolysis, zinc ion binding, metal ion binding, hydrolase activity, peptidase activity			SRAE_2000469200	77.5194	SPAL_0001170900	64.0827
SSTP_0000265400	PC2	0.014	A0A0K0DZJ2		VWF_A, vWFA_dom_sf	membrane, integral component of membrane			SRAE_X000178700	74.0283	SPAL_0001260600	65.371	SVE_0825100	63.7809
SSTP_0000362000	PC2	0.014	A0A0K0E298		DUF273	membrane, integral component of membrane			SRAE_2000368500	62.2047			SVE_2008500	15.4856
SSTP_0000864800	PC2	0.014	A0A0K0EGN7		Small_GTPase, Small_GTP-bd_dom, Small_GTPase_Ras-type, P-loop_NTPase	GTPase activity, signal transduction, GTP binding, membrane, nucleotide binding	rap-3	24.6305			SPAL_0000386000	66.9951	SVE_1904400	64.532
SSTP_0000482500	PC2	0.014	A0A0K0E5N7		CAP_sf	NA			SRAE_2000124500	23.7785
SSTP_0000894300	PC2	0.014	A0A0K0EHI8		C-type_lectin-like, Peptidase_S9, VWF_A, Peptidase_S9A, C-type_lectin-like/link_sf, CTDL_fold, Pept_S9A_N, AB_hydrolase, vWFA_dom_sf	serine-type exopeptidase activity, serine-type peptidase activity, serine-type endopeptidase activity, proteolysis, membrane, integral component of membrane			SRAE_1000321400	28.47
SSTP_0000339450	PC2	0.014	A0A0K0E1M6		NA	NA					SPAL_0000519400	40.5488	SVE_1846700	42.0732
SSTP_0001020300	PC2	0.014	A0A0K0EL59		NA	NA
SSTP_0000678300	PC2	0.014	A0A0K0EBB1		NA	NA
SSTP_0000637800	PC2	0.014	A0A0K0EA51		EndoU_C, EndoU-like, ENDOU	endoribonuclease activity, RNA phosphodiester bond hydrolysis, endonucleolytic	endu-1	39.4904	SRAE_X000043100	66.879	SPAL_0000176600	38.2166	SVE_1329300	50.6369
SSTP_0000989600	PC2	0.014	A0A0K0EKA2		NA	NA			SRAE_1000063400	72.7273			SVE_0269500	59.0909
SSTP_0000648600	PC2	0.014	A0A0K0EAG1		7TM_GPCR_serpentine_rcpt_Sre	sensory perception of chemical stimulus, integral component of membrane, membrane							SVE_1566100	17.8042
SSTP_0001007600	PC2	0.014	A0A0K0EKT5		NA	membrane, integral component of membrane			SRAE_2000105600	76.1468	SPAL_0001010250	54.1284	SVE_0514800	75.2294
SSTP_0000002300	PC2	0.014	A0A0K0DS08		DOMON_domain	NA	Y57G11A.4	36.7133	SRAE_X000025700	85.6643	SPAL_0001357600	76.2238	SVE_0059300	74.8252
SSTP_0000433100	PC2	0.014	A0A0K0E4B2		NA	NA
SSTP_0001182800	PC2	0.014	A0A0K0EQU7		Malate_synthase, Malate_synthA, Isocitrate_lyase, Malate_synth-like_sf, Pyrv/PenolPyrv_Kinase-like_dom, Isocitrate_lyase_ph_CS, ICL/PEPM, Pyrv_Kinase-like_dom_sf	glyoxylate cycle, malate synthase activity, isocitrate lyase activity, carboxylic acid metabolic process, catalytic activity	icl-1	66.908	SRAE_1000257200	93.2782	SPAL_0000865800	48.7073	SVE_1042500	91.2099
SSTP_0000347950	PC2	0.014	A0A0K0E1W1		NA	NA
SSTP_0000433500	PC2	0.014	A0A0K0E4B6		SSD, Ptc/Disp	integral component of membrane, membrane			SRAE_X000173100	84.7778	SPAL_0001690300	79.8889	SVE_0661800	79.8889
SSTP_0000922800	PC2	0.014	A0A0K0EIC2		Alpha-crystallin/HSP, A-crystallin/Hsp20_dom, HSP20-like_chaperone	NA					SPAL_0001574600	83.3333	SVE_0978900	83.3333
SSTP_0000254900	PC2	0.014	A0A0K0DZ84		NA	NA			SRAE_2000435900	31.1111
SSTP_0001040200	PC2	0.014	A0A0K0ELR1		NA	NA
SSTP_0000434000	PC2	0.014	A0A0K0E4C1		AA_transpt_TM	membrane, integral component of membrane	Y4C6B.2	52.9183	SRAE_X000173500	92.607	SPAL_0001690700	90.6615	SVE_0661300	90.4669
SSTP_0000957000	PC2	0.014	A0A0K0EJC4		IPPc, Endo/exonu/phosph_ase_sf	phosphatidylinositol dephosphorylation, hydrolase activity	inpp-1	23.5465	SRAE_0000001000	85.7558	SPAL_0001749500	73.5465	SVE_1103300	75
SSTP_0000504000	PC2	0.014	A0A0K0E6A9		NA	NA
SSTP_0001007500	PC2	0.014	A0A0K0EKT4		NA	NA			SRAE_2000105650	55.814
SSTP_0000538600	PC2	0.014	A0A0K0E7B0	Zinc metalloproteinase	EGF-like_dom, Peptidase_M12A, Peptidase_Metallo, Metallopeptidase_nem, Astacin-like_dom	molting cycle, collagen and cuticulin-based cuticle, metalloendopeptidase activity, metallopeptidase activity, proteolysis, zinc ion binding, extracellular region			SRAE_2000460300	57.4468	SPAL_0001538600	37.8723	SVE_0603200	44.8936
SSTP_0000208400	PC2	0.014	A0A0K0DXX0		NA	membrane, integral component of membrane			SRAE_2000413700	61.2245	SPAL_0001738000	51.0204	SVE_1620700	48.5714
SSTP_0000212900	PC2	0.014	A0A0K0DY16		NA	membrane, integral component of membrane			SRAE_2000415600	84.1727			SVE_1627900	74.8201
SSTP_0001212300	PC2	0.014	A0A0K0ERP3		NA	NA			SRAE_2000507100	38.4615
SSTP_0000591300	PC2	0.014	A0A0K0E8T1		NA	membrane, integral component of membrane			SRAE_1000286200	80	SPAL_0000003300	63.3333	SVE_0635500	65
SSTP_0000860500	PC2	0.014	A0A0K0EGJ3		NA	NA			SRAE_X000039500	66.8325	SPAL_0000534100	43.1177	SVE_0105600	50.2488
SSTP_0000617200	PC2	0.014	A0A0K0E9I9		Ribosomal_L34Ae, Ribosomal_L34e_CS, Ribosomal_L34Ae_sf	ribosome, translation, structural constituent of ribosome, intracellular	rpl-34	54.8673	SRAE_X000053600	85.8407	SPAL_0001324300	82.3009	SVE_0689200	81.4159
SSTP_0000166000	PC2	0.014	A0A0K0DWP3		NA	membrane, integral component of membrane			SRAE_2000529200	94.186			SVE_0901000	77.907
SSTP_0000948900	PC2	0.014	A0A0K0EJ38	Guanylate cyclase	Prot_kinase_dom, A/G_cyclase, ANF_lig-bd_rcpt, Kinase-like_dom_sf, A/G_cyclase_CS, Peripla_BP_I, Nucleotide_cyclase	intracellular signal transduction, cyclic nucleotide biosynthetic process, phosphorus-oxygen lyase activity, protein phosphorylation, protein kinase activity, ATP binding, nucleotide binding, membrane, integral component of membrane, guanylate cyclase activity, cGMP biosynthetic process, lyase activity
SSTP_0000536500	PC2	0.014	A0A0K0E788		PLC-like_Pdiesterase_TIM-brl, GP_PDE_dom	lipid metabolic process, phosphoric diester hydrolase activity, membrane, integral component of membrane			SRAE_2000458500	74.4382	SPAL_0001301900	67.9775	SVE_0344800	71.0674
SSTP_0000392200	PC2	0.014	A0A0K0E351		NA	NA			SRAE_2000044300	80.9843	SPAL_0001000600	68.6801	SVE_1854800	60.8501
SSTP_0001251100	PC2	0.014	A0A0K0EST1		Adenylyl_cyclase_CyaB, CYTH-like_dom_sf	NA			SRAE_X000113400	90.0498	SPAL_0000695300	85.0746	SVE_0624900	84.5771
SSTP_0000441400	PC2	0.014	A0A0K0E4J4		NA	NA			SRAE_2000515500	26.958	SPAL_0001169400	20.7749	SVE_0237300	33.5532
SSTP_0001088300	PC2	0.014	A0A0K0EN47		NA	membrane, integral component of membrane
SSTP_0000425800	PC2	0.014	A0A0K0E440		GPCR_Rhodpsn, GPCR_Rhodpsn_7TM	G protein-coupled receptor signaling pathway, G protein-coupled receptor activity, integral component of membrane, membrane			SRAE_2000446700	86.4721			SVE_0340900	81.4324
SSTP_0000365000	PC2	0.014	A0A0K0E2D0		Gp-FAR-1	lipid binding			SRAE_2000450800	86.1111			SVE_0734200	59.4444
SSTP_0000847800	PC2	0.014	A0A0K0EG68		CRISP-related, CAP_domain, CAP_sf	NA			SRAE_2000129590	25.8567
SSTP_0000608800	PC2	-0.014	A0A0K0E9A4		NA	membrane, integral component of membrane			SRAE_1000344800	65.8537	SPAL_0001641500	60.2439	SVE_0644700	59.7561
SSTP_0000178500	PC2	-0.014	A0A0K0DX18		NA	NA			SRAE_2000015200	57.9125	SPAL_0001450300	38.7205	SVE_1801800	38.0471
SSTP_0000570400	PC2	-0.014	A0A0K0E873		SCVP	NA			SRAE_1000232100	80.1587	SPAL_0001289100	71.4286
SSTP_0000178000	PC2	-0.014	A0A0K0DX13		NA	NA			SRAE_2000015700	90.2941	SPAL_0001450700	80.5882	SVE_1802300	79.7059
SSTP_0000336700	PC2	-0.014	A0A0K0E1J8		NA	NA			SRAE_1000204600	76.6667	SPAL_0001580900	67.5	SVE_0986200	65.4167
SSTP_0000258000	PC2	-0.014	A0A0K0DZB4		DUF267_CAE_spp	membrane, integral component of membrane			SRAE_2000440200	83.6585	SPAL_0001431500	77.8049	SVE_0576900	77.0732
SSTP_0000751200	PC2	-0.014	A0A0K0EDE9		Kinesin_motor_dom, P-loop_NTPase, Kinesin-like_fam, Kinesin_motor_dom_sf	microtubule-based movement, microtubule motor activity, microtubule binding, ATP binding, nucleotide binding, motor activity
SSTP_0001084800	PC2	-0.014	A0A0K0EN10		PTPase_domain, TYR_PHOSPHATASE_dom, Tyr_Pase_cat, Prot-tyrosine_phosphatase-like	protein dephosphorylation, protein tyrosine phosphatase activity, dephosphorylation, phosphatase activity, hydrolase activity, membrane, integral component of membrane, peptidyl-tyrosine dephosphorylation	Y69A2AR.19	11.1111	SRAE_2000267000	38.6285	SPAL_0001110300	32.6389	SVE_1912800	30.7292
SSTP_0000435900	PC2	-0.014	A0A0K0E4E0		Laminin_IV, EGF-like_dom, Laminin_G, Laminin_EGF, LDrepeatLR_classA_rpt, Ig_sub2, Ig_sub, Ig-like_dom, EGF-like_CS, Ig_I-set, Immunoglobulin, ConA-like_dom_sf, Ig-like_fold, LDLR_class-A_CS, LDL_receptor-like_sf, Ig-like_dom_sf	protein binding	unc-52	35.2392	SRAE_X000175600	50.0817	SPAL_0000802900	48.9615
SSTP_0000150800	PC2	-0.014	A0A0K0DW92	Adenosylhomocysteinase	Adenosylhomocysteinase-like, Ado_hCys_hydrolase_NAD-bd, S-Ado-L-homoCys_hydrolase_CS, Adenosylhomocysteinase, NAD(P)-bd_dom_sf	S-adenosylhomocysteine catabolic process, adenosylhomocysteinase activity, NAD binding, hydrolase activity, one-carbon metabolic process	ahcy-1	86.4368	SRAE_2000149000	94.7126			SVE_0188500	90.5747
SSTP_0000571900	PC2	-0.014	A0A0K0E888		Thioredoxin-like_fold, Thioredoxin_domain, Thioredoxin-like_sf	cell redox homeostasis, cell	R05H5.3	45.3333	SRAE_1000308100	78.6667	SPAL_0000261900	76.6667	SVE_1945800	79.3333
SSTP_0001239000	PC2	-0.014	A0A0K0ESG1		Chitin-bd_1, Glyco_hydro18_cat, Glyco_hydro_18_chit_AS, Chitinase_II, Glycoside_hydrolase_SF, Chitinase_insertion_sf, Endochitinase-like_sf	chitin binding, carbohydrate metabolic process, hydrolase activity, hydrolyzing O-glycosyl compounds, metabolic process, hydrolase activity, hydrolase activity, acting on glycosyl bonds	cht-2	48.4375
SSTP_0000485300	PC2	-0.014	A0A0K0E5S0		Kelch_1, BACK, Kelch-typ_b-propeller	protein binding	spe-26	15.2513	SRAE_1000326900	91.3345
SSTP_0000839200	PC2	-0.014	A0A0K0EFY5		NA	NA	ssq-2	62.3269	SRAE_1000301100	76.4543
SSTP_0000757300	PC2	-0.014	A0A0K0EDL1		SET_dom, Znf_C2H2_type, Znf_C2H2_sf	protein binding, nucleic acid binding	blmp-1	26.1557	SRAE_2000288600	88.9294	SPAL_0000884500	83.09	SVE_1713000	72.5061
SSTP_0000716600	PC2	-0.014	A0A0K0ECF1	DNA helicase	MCM_dom, MCM6, NA-bd_OB-fold, MCM_CS, P-loop_NTPase, MCM_N, MCM, MCM_OB, Mcm6_C, MCM_lid	MCM complex, DNA helicase activity, DNA replication initiation, DNA replication, DNA binding, nucleus, ATP binding, nucleotide binding, hydrolase activity, helicase activity, DNA duplex unwinding	mcm-6	57.5309	SRAE_2000056300	89.0123	SPAL_0000026500	86.5432	SVE_1819400	87.037
SSTP_0001122300	PC2	-0.014	A0A0K0EP36		EBP	sterol metabolic process, cholestenol delta-isomerase activity, integral component of membrane, membrane	Y38H6C.16	32.1586	SRAE_X000254800	82.8194	SPAL_0001091000	69.6035	SVE_0620700	61.674
SSTP_0000353100	PC2	-0.014	A0A0K0E211		NA	NA			SRAE_X000107000	69.3548	SPAL_0001387300	65.3226	SVE_0767000	62.0968
SSTP_0000806300	PC2	-0.014	A0A0K0EEZ9		ABC_transporter-like, AAA+_ATPase, ABC1_TM_dom, ABC_transporter_CS, P-loop_NTPase, ABC1_TM_sf, Type_I_exporter	ATPase activity, coupled to transmembrane movement of substances, ATPase activity, transmembrane transport, integral component of membrane, ATP binding, nucleotide binding, membrane, ATP hydrolysis coupled ion transmembrane transport	haf-2	42.0339	SRAE_2000132300	91.0734	SPAL_0000811500	86.2147	SVE_1880000	85.5367
SSTP_0000644000	PC2	-0.014	A0A0K0EAB5		Srp40/Nopp140	nucleolus					SPAL_0000334900	34.127	SVE_1887700	33.4921
SSTP_0000625600	PC2	-0.014	A0A0K0E9S4		SDR_fam, Sc_DH/Rdtase_CS, NAD(P)-bd_dom_sf	oxidoreductase activity, membrane, integral component of membrane, oxidation-reduction process			SRAE_1000187900	79.798	SPAL_0000273600	72.3906	SVE_1892900	73.064
SSTP_0001090100	PC2	-0.014	A0A0K0EN64		Ets_dom, Pointed_dom, SAM/pointed_sf, WH-like_DNA-bd_sf, WH_DNA-bd_sf	sequence-specific DNA binding, DNA-binding transcription factor activity, regulation of transcription, DNA-templated, nucleus, DNA binding	ets-4	27.6173	SRAE_X000034200	88.2672	SPAL_0001077000	75.6318	SVE_1980500	78.8809
SSTP_0000156800	PC2	-0.014	A0A0K0DWF2		NA	NA			SRAE_2000142400	57.59	SPAL_0000706600	46.1659	SVE_1872600	44.1315
SSTP_0001206100	PC2	-0.014	A0A0K0ERI1		Peptidase_S28, AB_hydrolase	serine-type peptidase activity, proteolysis			SRAE_1000275800	76.8173	SPAL_0000554100	70.7269	SVE_0778900	57.7603
SSTP_0000321000	PC2	-0.014	A0A0K0E148		NA	NA			SRAE_1000008400	39.7015	SPAL_0000104700	28.0597	SVE_0326100	25.9701
SSTP_0000382900	PC2	-0.014	A0A0K0E2W0		NA	NA					SPAL_0000598100	38.6707	SVE_1708500	41.0876
SSTP_0000076200	PC2	-0.014	A0A0K0DU48		CDT1_Gemini-bd-like, Cdt1_C, WH_DNA-bd_sf	NA			SRAE_2000443200	75.6793	SPAL_0000318000	72.8261	SVE_1582200	72.0109
SSTP_0000305700	PC2	-0.014	A0A0K0E0P5	Innexin	Innexin	membrane, integral component of membrane, ion transport, plasma membrane, gap junction, cell junction			SRAE_0000042100	87.6494	SPAL_0001646500	88.0478	SVE_1007100	87.0518
SSTP_0001213000	PC2	-0.014	A0A0K0ERQ0		SCVP	NA					SPAL_0000388000	45.1389	SVE_1156600	42.3611
SSTP_0001070300	PC2	-0.014			NA	NA	T19B10.2	55.3885	SRAE_1000124500	81.203	SPAL_0000163900	76.6917
SSTP_0000818800	PC2	-0.014	A0A0K0EFC5	Histone H2A	Histone_H2A, Histone_H2A/H2B/H3, Histone-fold, Histone_H2A_C, Histone_H2A_CS	nucleosome, protein heterodimerization activity, DNA binding, nucleus, chromosome	his-35	86.8217			SPAL_0000565200	98.4496	SVE_0064100	98.4496
SSTP_0000293200	PC2	-0.014	A0A0K0E0B8		PTPase_domain, TYR_PHOSPHATASE_dom, Tyr_Pase_cat, Tyr_Pase_AS, Prot-tyrosine_phosphatase-like	protein dephosphorylation, protein tyrosine phosphatase activity, dephosphorylation, phosphatase activity, hydrolase activity, membrane, integral component of membrane, peptidyl-tyrosine dephosphorylation, phosphoprotein phosphatase activity	K09F6.3	10.7081	SRAE_2000267000	40.1554	SPAL_0001110300	33.506	SVE_1912800	34.0242
SSTP_0000204500	PC2	-0.014	A0A0K0DXT0		Znf_RING, Znf_RING/FYVE/PHD, Znf_RING_CS, Vilya/Cst9/RNF212	NA			SRAE_2000205600	36.9295	SPAL_0001749000	32.3651	SVE_1102800	31.9502
SSTP_0000839600	PC2	-0.014	A0A0K0EFY9	Carboxylic ester hydrolase	CarbesteraseB, Carboxylesterase_B_AS, AB_hydrolase	hydrolase activity	K07C11.4	34.8754	SRAE_1000238200	83.6299	SPAL_0000247800	78.4697	SVE_0037200	77.9359
SSTP_0001058900	PC2	-0.014	A0A0K0EMA1		Neur_chan_lig-bd, Neur_chan_lig-bd_sf	extracellular ligand-gated ion channel activity, ion transport, integral component of membrane, membrane, transmembrane signaling receptor activity, ion channel activity, ion transmembrane transport	lgc-27	32.7059	SRAE_X000185300	87.2941	SPAL_0001466300	86.5882	SVE_0632800	84.9412
SSTP_0000696100	PC2	-0.014	A0A0K0EBU1		NA	NA			SRAE_2000390600	48.2877	SPAL_0000875500	44.863	SVE_0729700	46.5753
SSTP_0000759700	PC2	-0.014	A0A0K0EDN5		NA	NA			SRAE_2000285900	86.6029	SPAL_0000887000	72.2488	SVE_1715600	71.2919
SSTP_0000909800	PC2	-0.014	A0A0K0EHZ3		ZP_dom	NA			SRAE_1000245100	57.0048
SSTP_0000931400	PC2	-0.014	A0A0K0EIK8		Reeler_dom, ShKT_dom	NA	F23B12.4	35.6436	SRAE_1000156300	79.538	SPAL_0000748900	76.2376	SVE_1016200	78.8779
SSTP_0000723500	PC2	-0.014	A0A0K0ECM0	Protein Wnt	Wnt, Wnt_CS	signaling receptor binding, Wnt signaling pathway, extracellular region, multicellular organism development	lin-44	47.0284	SRAE_2000097900	88.8889	SPAL_0000770900	77.261	SVE_0450400	78.0362
SSTP_0000779800	PC2	-0.014	A0A0K0EE86		PDZ, PDZ_sf, T15H9.4-like	protein binding	smz-2	48.2759	SRAE_2000375100	88.9655	SPAL_0001741800	82.4138	SVE_0562700	82.7586
SSTP_0000080400	PC2	-0.014	A0A0K0DU90		PapD-like_sf	NA			SRAE_2000391900	76.1134	SPAL_0000313500	62.3482	SVE_1586700	59.919
SSTP_0000919600	PC2	-0.014	A0A0K0EI89		CUB_dom, Sperma_CUB_dom_sf	NA			SRAE_1000144800	73.8095	SPAL_0000759700	69.7279	SVE_0975200	69.7279
SSTP_0000487100	PC2	-0.014	A0A0K0E5T7		TSP1_rpt, Kunitz_BPTI, Reeler_dom, Spondin_N, Prtase_inh_Kunz-CS, TSP1_rpt_sf, Kunitz_BPTI_sf, Spondin_N_sf	serine-type endopeptidase inhibitor activity, negative regulation of endopeptidase activity	spon-1	54.4794	SRAE_X000018700	92.4939	SPAL_0000070600	86.6828	SVE_0908600	85.7143
SSTP_0000647400	PC2	-0.014	A0A0K0EAE9		EGF-like_dom, Laminin_EGF, Laminin_N, Laminin_IV_B, EGF-like_CS, Laminin_N_sf	NA	lam-1	54.3733	SRAE_2000522000	94.429	SPAL_0000597400	92.9805	SVE_0350700	92.6462
SSTP_0000742000	PC2	-0.014	A0A0K0ED57		GGT_peptidase, Ntn_hydrolases_N	glutathione catabolic process, glutathione hydrolase activity, proteolysis	T03D8.6	58.0372	SRAE_2000386200	93.9086	SPAL_0000423500	88.8325	SVE_1641900	87.4789
SSTP_0001155700	PC2	-0.014	A0A0K0EQ28		Acyl_CoA_acyltransferase	NA			SRAE_1000036300	79.0123
SSTP_0000017900	PC2	-0.014	A0A0K0DSG9		NA	membrane, integral component of membrane			SRAE_2000191400	34.764	SPAL_0000436600	29.6137	SVE_0418800	28.3262
SSTP_0001245400	PC2	-0.014	A0A0K0ESM4		DB	NA	C49F8.3	63.8418	SRAE_X000119500	96.0452	SPAL_0001443800	91.5254	SVE_0145300	90.3955
SSTP_0000721800	PC2	-0.014	A0A0K0ECK3	Galectin	Galectin_CRD, ConA-like_dom_sf	carbohydrate binding			SRAE_2000096000	72.4551	SPAL_0000207500	71.2575	SVE_0448200	72.4551
SSTP_0000247700	PC2	-0.014	A0A0K0DZ12		Laminin_IV, EGF-like_dom, Laminin_G, Laminin_EGF, Laminin_N, Galactose-bd-like_sf, Laminin_dom_II, EGF-like_CS, ConA-like_dom_sf, Laminin_N_sf	cell adhesion	epi-1	39.3402	SRAE_2000008600	90.962	SPAL_0000242400	86.4153
SSTP_0000540400	PC2	-0.014	A0A0K0E7C8		DUF148	NA			SRAE_1000161500	57.0732	SPAL_0001498100	33.6585	SVE_1163400	32.6829
SSTP_0000271500	PC2	-0.014	A0A0K0DZQ3		TGF-b_C, TGF-beta-rel, TGFb_CS, Cystine-knot_cytokine	growth factor activity, signal transduction, extracellular region	tig-3	8.47107			SPAL_0001294100	78.0992	SVE_1967300	76.8595
SSTP_0000237300	PC2	-0.015	A0A0K0DYQ7		SSD, Acrflvin-R, Ptc/Disp	transmembrane transport, transmembrane transporter activity, integral component of membrane, membrane	ptr-19	57.6516	SRAE_2000304700	89.2204	SPAL_0000303700	79.307	SVE_1596600	83.5419
SSTP_0000212700	PC2	-0.015	A0A0K0DY14		CRAL-TRIO_dom, GOLD_dom_sf, CRAL-TRIO_dom_sf	NA			SRAE_2000415400	86.7876	SPAL_0001204200	84.715	SVE_1627700	85.7513
SSTP_0000318000	PC2	-0.015	A0A0K0E118		NA	NA			SRAE_1000121300	62.6087	SPAL_0000167100	60.8696
SSTP_0000613900	PC2	-0.015	A0A0K0E9F6		NA	NA			SRAE_1000068400	27.6657
SSTP_0000672800	PC2	-0.015	A0A0K0EB57		VANGL	multicellular organism development, integral component of membrane, membrane	vang-1	36.9811	SRAE_X000068800	95.283	SPAL_0000194200	85.6604	SVE_0047300	87.9245
SSTP_0000857900	PC2	-0.015	A0A0K0EGG7		SAP_A, Interferon-induced_GILT	NA	pqn-48	51.8072	SRAE_X000228000	97.5904	SPAL_0001183000	85.5422	SVE_0107800	89.9598
SSTP_0000343200	PC2	-0.015	A0A0K0E1R4		NA	NA			SRAE_1000213800	47.619
SSTP_0000469700	PC2	-0.015	A0A0K0E5B3		Peptidase_M12A, MetalloPept_cat_dom_sf	metalloendopeptidase activity, metallopeptidase activity, proteolysis			SRAE_X000001400	72.3502	SPAL_0000456900	65.8986
SSTP_0000569500	PC2	-0.015	A0A0K0E864		MAP65_Ase1_PRC1	microtubule cytoskeleton organization, microtubule binding			SRAE_1000232900	81.3492	SPAL_0000482500	74.4048	SVE_0164600	75.7936
SSTP_0000392300	PC2	-0.015	A0A0K0E352		NA	NA							SVE_1854700	81.7204
SSTP_0000748900	PC2	-0.015	A0A0K0EDC6	Catalase	Catalase_haem_BS, Catalase_immune_responsive, Catalase_core, Catalase, Catalase_sf, Catalase_AS, Catalase_clade1/3, Catalase_core_sf, Catalase_3	hydrogen peroxide catabolic process, catalase activity, response to oxidative stress, heme binding, oxidation-reduction process, metal ion binding, oxidoreductase activity, cellular oxidant detoxification, peroxidase activity	ctl-2	67.3267	SRAE_2000298400	89.901	SPAL_0000311100	89.505	SVE_1589200	90.495
SSTP_0000228000	PC2	-0.015	A0A0K0DYG4	Dihydropyrimidine dehydrogenase [NADP(+)]	Dihydroorotate_DH_CS, Dihydroorotate_DH, Helical_ferredxn, Aldolase_TIM, 4Fe4S_Fe_S_CS, FAD/NAD-binding_dom, DPD_II, FAD/NAD-bd_sf	dihydroorotate dehydrogenase activity, 'de novo' pyrimidine nucleobase biosynthetic process, oxidoreductase activity, acting on the CH-CH group of donors, cytoplasm, oxidation-reduction process, oxidoreductase activity, iron-sulfur cluster binding, catalytic activity, 4 iron, 4 sulfur cluster binding, dihydropyrimidine dehydrogenase (NADP+) activity, beta-alanine biosynthetic process	dpyd-1	66.1626	SRAE_2000356400	93.4783	SPAL_0001053900	92.0605	SVE_1770500	91.5879
SSTP_0000428400	PC2	-0.015	A0A0K0E466		Acyl-CoA-binding_protein, FERM/acyl-CoA-bd_prot_sf, Acyl-CoA-binding_prot_CS, Acyl-CoA-binding_sf	fatty-acyl-CoA binding	acbp-1	64.7059
SSTP_0000916800	PC2	-0.015	A0A0K0EI61		Nuc_sug_transpt	pyrimidine nucleotide-sugar transmembrane transport, pyrimidine nucleotide-sugar transmembrane transporter activity, Golgi membrane, integral component of membrane, membrane	nstp-3	49.4186	SRAE_1000142000	89.2442	SPAL_0000756500	88.3721	SVE_0971900	88.6628
SSTP_0000693800	PC2	-0.015	A0A0K0EBR7		AAA+_ATPase, DNA_repair_Rad51/TF_NusA_a-hlx, DNA_recomb/repair_Rad51_C, DNA_recomb/repair_RecA-like, P-loop_NTPase, Rad51_DMC1_RadA	nucleotide binding, DNA binding, ATP binding, DNA repair, DNA metabolic process, DNA-dependent ATPase activity	rad-51	43.9891	SRAE_2000311000	67.2131	SPAL_0000296900	81.4208	SVE_1603500	76.2295
SSTP_0000903600	PC2	-0.015	A0A0K0EHT1		Prot_kinase_dom, Ser/Thr_kinase_AS, Kinase-like_dom_sf, Protein_kinase_ATP_BS	protein phosphorylation, protein kinase activity, ATP binding	chk-1	32.2896	SRAE_1000181500	86.4971	SPAL_0000822200	74.5597	SVE_0942500	82.5832
SSTP_0000854800	PC2	-0.015	A0A0K0EGD7		NA	NA
SSTP_0000758800	PC2	-0.015	A0A0K0EDM6		NA	NA			SRAE_2000286800	68.6364	SPAL_0000886100	70.9091	SVE_1714600	73.1818
SSTP_0000480600	PC2	-0.015	A0A0K0E5L9	Histone H3	Histone_H3/CENP-A, Histone_H2A/H2B/H3, Histone-fold	nucleosome, protein heterodimerization activity, DNA binding, nucleus, chromosome	his-71	95.5882	SRAE_X000165500	97.0588	SPAL_0000373900	97.0588	SVE_0307000	97.0588
SSTP_0000991200	PC2	-0.015	A0A0K0EKB8		NA	membrane, integral component of membrane
SSTP_0001240300	PC2	-0.015	A0A0K0ESH4		Fungal_lipase-like, AB_hydrolase	lipid metabolic process, hydrolase activity	F46G10.4	31.9149	SRAE_X000125100	76.9504	SPAL_0000109800	67.3759	SVE_0136700	66.3121
SSTP_0000791100	PC2	-0.015	A0A0K0EEJ9		NA	NA					SPAL_0001421000	75	SVE_0535900	73.0769
SSTP_0001060100	PC2	-0.015	A0A0K0EMB3	S-adenosylmethionine synthase	S-AdoMet_synthetase, S-AdoMet_synt_N, S-AdoMet_synt_central, S-AdoMet_synt_C, ADOMET_SYNTHASE_CS, S-AdoMet_synthetase_sfam	S-adenosylmethionine biosynthetic process, methionine adenosyltransferase activity, ATP binding, nucleotide binding, transferase activity, metal ion binding, one-carbon metabolic process	sams-1	72.8426	SRAE_X000186400	93.6548	SPAL_0001467400	91.8782	SVE_0819900	92.3858
SSTP_0000013500	PC2	-0.015	A0A0K0DSC4		EF_hand_dom, Haem_peroxidase_sf, EF-hand-dom_pair, FAD-bd_8, Fe_red_NAD-bd_6, Fe3_Rdtase_TM_dom, FAD-bd_FR_type, Riboflavin_synthase-like_b-brl, EF_Hand_1_Ca_BS, Haem_peroxidase_animal, DUOX1/Duox, DUOX_peroxidase, Haem_peroxidase_sf_animal, FNR_nucleotide-bd	response to oxidative stress, heme binding, peroxidase activity, hydrogen peroxide biosynthetic process, NAD(P)H oxidase activity, calcium ion binding, oxidation-reduction process, oxidoreductase activity, membrane, integral component of membrane, cellular oxidant detoxification	bli-3	53.137	SRAE_2000273050	88.9245	SPAL_0001036300	90.4609	SVE_0487900	93.1498
SSTP_0001063200	PC2	-0.015	A0A0K0EME4		NA	NA			SRAE_1000061800	50.8814	SPAL_0001613200	42.6282	SVE_0550800	41.5064
SSTP_0001241100	PC2	-0.015	A0A0K0ESI2		Znf_C2H2_type, Znf_C2H2_sf	nucleic acid binding			SRAE_X000124100	87.581
SSTP_0000601900	PC2	-0.015	A0A0K0E935		Prot_kinase_dom, Ser/Thr_kinase_AS, Kinase-like_dom_sf, Protein_kinase_ATP_BS	protein phosphorylation, protein kinase activity, ATP binding, nucleotide binding, protein serine/threonine kinase activity	cdk-1	60.3175	SRAE_1000335100	93.6508	SPAL_0000952400	93.9683	SVE_0313400	94.6032
SSTP_0001251300	PC2	-0.015	A0A0K0EST3		SAP_A, Interferon-induced_GILT	NA			SRAE_X000113200	86.8154	SPAL_0000695100	58.0122	SVE_0625100	55.9838
SSTP_0000166300	PC2	-0.015	A0A0K0DWP6		ShKT_dom	NA			SRAE_2000529400	81.1861	SPAL_0000022700	67.2802	SVE_0900200	68.0982
SSTP_0001091700	PC2	-0.015	A0A0K0EN80		DB	NA	pqn-32	30.4991	SRAE_X000031200	55.8226	SPAL_0001608800	46.3956	SVE_1982700	62.1072
SSTP_0000439900	PC2	-0.015	A0A0K0E4H9		NA	NA
SSTP_0001009000	PC2	-0.015	A0A0K0EKU7		DUF229, Alkaline_phosphatase_core_sf	catalytic activity, membrane, integral component of membrane	R03G8.3	23.3434			SPAL_0000334300	48.7952	SVE_1148700	43.0723
SSTP_0000985100	PC2	-0.015	A0A0K0EK59		Cyt_P450, Cyt_P450_E_grp-I, Cyt_P450_CS, Cyt_P450_sf	oxidoreductase activity, acting on paired donors, with incorporation or reduction of molecular oxygen, iron ion binding, heme binding, oxidation-reduction process, metal ion binding, oxidoreductase activity, monooxygenase activity	cyp-29A2	36.5462	SRAE_2000428800	85.3414	SPAL_0000428800	75.9036	SVE_0653300	75.1004
SSTP_0000850500	PC2	-0.015	A0A0K0EG95		EGF-type_Asp/Asn_hydroxyl_site, FA58C, Sushi_SCR_CCP_dom, EGF-like_dom, CUB_dom, C-type_lectin-like, EGF-like_Ca-bd_dom, LDrepeatLR_classA_rpt, HYR_dom, Galactose-bd-like_sf, Growth_fac_rcpt_cys_sf, Tyr-kin_ephrin_A/B_rcpt-like, EGF-like_CS, C-type_lectin-like/link_sf, CTDL_fold, EGF_Ca-bd_CS, LDLR_class-A_CS, Sperma_CUB_dom_sf, Sushi/SCR/CCP_sf, LDL_receptor-like_sf	calcium ion binding, protein binding	clec-78	42.0534	SRAE_X000206800	87.0605	SPAL_0000944300	76.512	SVE_1684300	25.8322
SSTP_0001040900	PC2	-0.015	A0A0K0ELR8		SEA_dom, EGF-type_Asp/Asn_hydroxyl_site, EGF-like_dom, EGF-like_Ca-bd_dom, VWF_A, LDrepeatLR_classA_rpt, Growth_fac_rcpt_cys_sf, EGF-like_CS, EGF_Ca-bd_CS, LDL_receptor-like_sf, SEA_dom_sf, vWFA_dom_sf	calcium ion binding, protein binding, membrane, integral component of membrane					SPAL_0000306800	84.7254	SVE_1593500	84.2401
SSTP_0000860700	PC2	-0.015	A0A0K0EGJ5	Isocitrate dehydrogenase [NADP]	Isocitrate_DH_NADP, IsoCit/isopropylmalate_DH_CS, IsoPropMal-DH-like_dom	isocitrate metabolic process, isocitrate dehydrogenase (NADP+) activity, NAD binding, oxidoreductase activity, acting on the CH-OH group of donors, NAD or NADP as acceptor, oxidation-reduction process, magnesium ion binding, metal ion binding, oxidoreductase activity, tricarboxylic acid cycle	idh-1	83.5322	SRAE_X000039300	91.8854	SPAL_0000534300	93.5561	SVE_0105400	93.5561
SSTP_0000459500	PC2	-0.015	A0A0K0E511		Calycin, DUF1794	NA	C28H8.5	43.4426	SRAE_2000049900	80.3279	SPAL_0000709600	89.3443	SVE_1870100	79.0984
SSTP_0000695500	PC2	-0.015	A0A0K0EBT5		NA	NA			SRAE_2000519600	71.7037	SPAL_0000876100	62.0741	SVE_0729100	62.5185
SSTP_0000534100	PC2	-0.015	A0A0K0E765		NA	membrane, integral component of membrane	F37B12.1	26.1194
SSTP_0000755800	PC2	-0.015	A0A0K0EDJ6		Septin, P-loop_NTPase, G_SEPTIN_dom	GTP binding, nucleotide binding	unc-59	44.7368					SVE_0558000	89.9522
SSTP_0001245600	PC2	-0.015	A0A0K0ESM6		NA	membrane, integral component of membrane			SRAE_X000119300	73.2852	SPAL_0001272900	55.9567	SVE_0304600	55.9567
SSTP_0000839300	PC2	-0.015	A0A0K0EFY6		SapB_2, SaposinB_dom, Saposin-like	NA							SVE_0361300	57.5
SSTP_0000178400	PC2	-0.015	A0A0K0DX17		KH_dom, KH_dom_type_1, KH_dom_type_1_sf	RNA binding, nucleic acid binding			SRAE_2000015300	81.2821	SPAL_0001450400	68.9744	SVE_1801900	68.4615
SSTP_0000375900	PC2	-0.015	A0A0K0E2P0		RRM_dom, Tudor, Nucleotide-bd_a/b_plait_sf, RBD_domain_sf	nucleic acid binding, RNA binding			SRAE_2000404700	74.6439	SPAL_0000497000	73.7892	SVE_0700300	73.2194
SSTP_0000806200	PC2	-0.015	A0A0K0EEZ8		NA	NA			SRAE_2000132400	71.9298	SPAL_0000811400	56.8421	SVE_1880100	55.4386
SSTP_0000953900	PC2	-0.015	A0A0K0EJ90		ShKT_dom	NA			SRAE_2000468000	67.7885	SPAL_0001044800	58.1731	SVE_0591100	58.6538
SSTP_0001197800	PC2	-0.015	A0A0K0ER93		NA	membrane, integral component of membrane			SRAE_1000021600	50.2857	SPAL_0000334400	29.1429	SVE_1887200	26.2857
SSTP_0001198300	PC2	-0.015	A0A0K0ERA0		VWF_A, vWFA_dom_sf	membrane, integral component of membrane			SRAE_1000021800	71.9912	SPAL_0000103800	61.0503	SVE_0325300	60.9409
SSTP_0000926500	PC2	-0.015	A0A0K0EIG0		Rab-GTPase-TBC_dom, PH_domain, Col_cuticle_N, Collagen, PH-like_dom_sf, Rab-GTPase_TBC_sf	structural constituent of cuticle, membrane, integral component of membrane	tbc-19	24.472	SRAE_1000151900	65.9141	SPAL_0001578200	79.8252	SVE_0983100	54.8434
SSTP_0000485400	PC2	-0.015	A0A0K0E5S1		Na/ntran_symport, SNS_sf	neurotransmitter:sodium symporter activity, integral component of membrane, membrane, transmembrane transport, neurotransmitter transport, symporter activity			SRAE_1000327000	88.0665	SPAL_0000035300	80.0604	SVE_0396500	79.6073
SSTP_0000883200	PC2	-0.015	A0A0K0EH74		MFS, MFS_dom, MFS_trans_sf	transmembrane transport, integral component of membrane, membrane	C05G5.1	49.6718	SRAE_X000149500	83.151	SPAL_0001329400	85.1204	SVE_0101000	84.0263
SSTP_0000609300	PC2	-0.015	A0A0K0E9B0		NA	NA
SSTP_0000742500	PC2	-0.015	A0A0K0ED62		Col_cuticle_N, Collagen	structural constituent of cuticle, membrane, integral component of membrane	rol-6	43.2624	SRAE_2000385900	79.4326	SPAL_0000423100	75.4137	SVE_1642300	78.2506
SSTP_0000573900	PC2	-0.015	A0A0K0E8A8		NA	NA			SRAE_1000329900	61.0422	SPAL_0000893100	44.665	SVE_0401200	41.1911
SSTP_0000185500	PC2	-0.015	A0A0K0DX88		Pan_app	NA			SRAE_2000118100	69.9459	SPAL_0000568600	63.8919	SVE_0409000	64.2162
SSTP_0000614300	PC2	-0.015	A0A0K0E9G0		NA	NA
SSTP_0000037700	PC2	-0.015	A0A0K0DT16		ANF_lig-bd_rcpt, GPCR_3_C, Peripla_BP_I	G protein-coupled receptor signaling pathway, G protein-coupled receptor activity, integral component of membrane, membrane			SRAE_2000136100	82.9616			SVE_1957700	78.2337
SSTP_0000073900	PC2	-0.015	A0A0K0DU23		NA	membrane, integral component of membrane			SRAE_1000167800	87.6307	SPAL_0000850900	83.6237	SVE_0739000	82.0557
SSTP_0000763400	PC2	-0.015	A0A0K0EDS2	DNA helicase	MCM_dom, AAA+_ATPase, MCM5, NA-bd_OB-fold, MCM_CS, P-loop_NTPase, MCM_N, MCM, MCM_OB, MCM_lid	DNA replication origin binding, MCM complex, DNA replication initiation, DNA replication, DNA binding, nucleus, ATP binding, nucleotide binding, hydrolase activity, helicase activity	mcm-5	62.4152	SRAE_2000282000	93.6228	SPAL_0001404400	94.0299	SVE_1719700	93.7585
SSTP_0001185800	PC2	-0.015	A0A0K0EQX7		NA	NA	C17F4.7	47.9167	SRAE_1000260100	72.3958	SPAL_0000171600	72.3958
SSTP_0000840500	PC2	-0.015	A0A0K0EFZ7		LDLR_classB_rpt, EGF-type_Asp/Asn_hydroxyl_site, EGF-like_dom, EGF-like_Ca-bd_dom, NIDO_dom, G2_nidogen/fibulin_G2F, GFP, Growth_fac_rcpt_cys_sf, 6-blade_b-propeller_TolB-like, EGF-like_CS	cell-matrix adhesion, calcium ion binding, membrane	nid-1	37.3626	SRAE_1000237200	82.7408	SPAL_0000018000	75.3717	SVE_1702500	9.76083
SSTP_0000149200	PC2	-0.015	A0A0K0DW76		Kunitz_BPTI, EB_dom, Cys_repeat_1, Prtase_inh_Kunz-CS, Lustrin_cystein, Kunitz_BPTI_sf	serine-type endopeptidase inhibitor activity, membrane, integral component of membrane, negative regulation of endopeptidase activity	F30H5.3	61.272	SRAE_X000153450	91.3728	SPAL_0001251000	87.8463	SVE_0719200	88.0353
SSTP_0000763800	PC2	-0.015	A0A0K0EDS6	Zinc metalloproteinase	CUB_dom, TSP1_rpt, Peptidase_M12A, Peptidase_Metallo, Metallopeptidase_nem, MetalloPept_cat_dom_sf, Astacin-like_dom, Sperma_CUB_dom_sf, TSP1_rpt_sf	molting cycle, collagen and cuticulin-based cuticle, metalloendopeptidase activity, metallopeptidase activity, proteolysis, zinc ion binding, metal ion binding, hydrolase activity, membrane, integral component of membrane, peptidase activity, extracellular region	nas-36	46.4342	SRAE_2000281400	86.6878	SPAL_0001405000	82.8843
SSTP_0000212500	PC2	-0.015	A0A0K0DY12		RNaseH-like_sf, Exonuclease_RNaseT/DNA_pol3, Rex4, RNaseH_sf, REX4_DEDDh_dom	3'-5' exonuclease activity, rRNA processing, nucleic acid binding, nucleic acid phosphodiester bond hydrolysis			SRAE_2000415200	68.0672	SPAL_0001203500	61.3445	SVE_1626700	71.8487
SSTP_0000864200	PC2	-0.015	A0A0K0EGN1		NA	NA
SSTP_0000177000	PC2	-0.015	A0A0K0DX03		NA	NA			SRAE_2000115300	89.8305	SPAL_0001636600	85.3107	SVE_0429900	85.3107
SSTP_0000925800	PC2	-0.015	A0A0K0EIF3		MAM_dom, ConA-like_dom_sf	membrane	mam-7	33.9093	SRAE_1000151100	83.3693	SPAL_0001577500	74.946	SVE_0982300	73.6501
SSTP_0000936700	PC2	-0.015	A0A0K0EIR1		TSP1_rpt, TSP1_rpt_sf	NA	F14H12.3	33.6449	SRAE_2000503600	67.9128	SPAL_0000680200	61.3707	SVE_0583700	56.3863
SSTP_0001052600	PC2	-0.015	A0A0K0EM38		CUB_dom, Sperma_CUB_dom_sf	NA			SRAE_X000060200	65.5702	SPAL_0001365900	55.5921	SVE_1974600	53.8377
SSTP_0000469800	PC2	-0.015	A0A0K0E5B4		ZP_dom	membrane, integral component of membrane	cutl-5	36.7742	SRAE_X000001500	87.0968	SPAL_0000210300	60.6452	SVE_1694900	58.4946
SSTP_0001163700	PC2	-0.015	A0A0K0EQA8		NA	membrane, integral component of membrane			SRAE_1000057200	70.8571	SPAL_0000804200	42.0952	SVE_1948300	54.8571
SSTP_0000735200	PC2	-0.015	A0A0K0ECY7		SLC26A/SulP_fam, Kunitz_BPTI, STAS_dom, Cys_repeat_1, SLC26A/SulP_dom, S04_transporter_CS, Lustrin_cystein, STAS_dom_sf, Kunitz_BPTI_sf	secondary active sulfate transmembrane transporter activity, sulfate transport, sulfate transmembrane transporter activity, serine-type endopeptidase inhibitor activity, transmembrane transport, integral component of membrane, membrane, negative regulation of endopeptidase activity, sulfate transmembrane transport	sulp-2	10.6602	SRAE_0000018800	82.9545	SPAL_0000727600	6.60173	SVE_0240100	11.3636
SSTP_0000313700	PC2	-0.015	A0A0K0E0X5		NA	membrane, integral component of membrane			SRAE_1000205600	62.6316	SPAL_0001060200	58.9474	SVE_0838000	58.4211
SSTP_0000742100	PC2	-0.015	A0A0K0ED58		NA	NA			SRAE_2000386100	61.976	SPAL_0000423400	52.5449	SVE_1642000	56.4371
SSTP_0000935000	PC2	-0.015	A0A0K0EIP4		vWFA_dom_sf	NA			SRAE_2000505500	37.1021	SPAL_0001206600	25.7958	SVE_0585300	24.0395
SSTP_0000061000	PC2	-0.015	A0A0K0DTP7		NA	membrane, integral component of membrane			SRAE_X000164000	73.494	SPAL_0000375400	66.2651	SVE_0305500	63.8554
SSTP_0000938700	PC2	-0.015	A0A0K0EIT1		NA	NA			SRAE_2000495000	83.682	SPAL_0001717600	73.2218	SVE_0376000	73.6402
SSTP_0000520100	PC2	-0.016	A0A0K0E6S4		NA	NA			SRAE_2000094200	76.9231	SPAL_0000903100	66.1538	SVE_0794600	67.6923
SSTP_0000838600	PC2	-0.016	A0A0K0EFX9		HORMA_dom, Mad2, HORMA_dom_sf	mitotic spindle assembly checkpoint	mdf-2	40.2913	SRAE_1000300600	95.6311	SPAL_0001310100	90.7767	SVE_0361000	88.835
SSTP_0000462900	PC2	-0.016	A0A0K0E546		Peptidase_M14, M14A_act_pep, ShKT_dom, IGCP-like_CPD, M14A-like_propep	carboxypeptidase activity, proteolysis, zinc ion binding, metallocarboxypeptidase activity	Y18H1A.9	52.8409	SRAE_2000317100	84.6591	SPAL_0000290400	87.3106	SVE_1610500	87.3106
SSTP_0001231300	PC2	-0.016	A0A0K0ES85		DB	membrane, integral component of membrane	ZK1010.4	22.8873	SRAE_X000134700	55.9859	SPAL_0001454000	66.1972	SVE_0903000	74.6479
SSTP_0000003600	PC2	-0.016	A0A0K0DS22	Elongation of very long chain fatty acids protein	ELO_fam, ELO_CS	integral component of membrane, transferase activity, membrane, lipid metabolic process, fatty acid metabolic process, fatty acid biosynthetic process, 3-oxo-arachidoyl-CoA synthase activity, 3-oxo-cerotoyl-CoA synthase activity, 3-oxo-lignoceronyl-CoA synthase activity, very-long-chain 3-ketoacyl-CoA synthase activity	elo-1	55.2448	SRAE_X000012700	85.3147	SPAL_0001596900	82.5175	SVE_0128900	81.1189
SSTP_0000925700	PC2	-0.016	A0A0K0EIF2		Ets_dom, WH-like_DNA-bd_sf, WH_DNA-bd_sf	sequence-specific DNA binding, DNA-binding transcription factor activity, regulation of transcription, DNA-templated, nucleus, DNA binding			SRAE_1000151000	37.0155	SPAL_0001577400	26.5504	SVE_0982200	47.8682
SSTP_0001216400	PC2	-0.016	A0A0K0ERT4		NA	NA	T24C4.2	14.6269	SRAE_1000298000	58.806	SPAL_0001565500	68.3582	SVE_0219600	68.5075
SSTP_0000395200	PC2	-0.016	A0A0K0E380		Znf_RanBP2, RBD_domain_sf, Znf_RanBP2_sf	nucleic acid binding, metal ion binding			SRAE_2000140800	29.7297	SPAL_0001081100	25	SVE_0717800	25
SSTP_0000012600	PC2	-0.016	A0A0K0DSB6		Glutaredoxin, Glutaredoxin_subgr, Thioredoxin-like_sf	cell redox homeostasis, electron transfer activity, protein disulfide oxidoreductase activity, cell, oxidation-reduction process, electron transport chain	ZC334.7	18.75	SRAE_2000272100	76.8519	SPAL_0001037500	70.3704	SVE_0486600	61.3426
SSTP_0000764600	PC2	-0.016	A0A0K0EDT4		NA	NA	T23F6.2	46.0938	SRAE_2000280700	68.75	SPAL_0001406000	77.3438	SVE_1721500	77.7344
SSTP_0000529900	PC2	-0.016	A0A0K0E723		Fringe-like	transferase activity, transferring glycosyl groups, membrane			SRAE_1000061400	74.0413	SPAL_0000978000	66.9617	SVE_0175500	69.3215
SSTP_0001087100	PC2	-0.016	A0A0K0EN34		SSD, Ptc/Disp	integral component of membrane, membrane	ptr-18	54.7106	SRAE_X000037000	88.4222	SPAL_0001074200	85.8116	SVE_1977600	85.6981
SSTP_0000741000	PC2	-0.016	A0A0K0ED47		NA	membrane, integral component of membrane			SRAE_2000387200	82.2917	SPAL_0000006300	74.4792	SVE_0670600	72.9167
SSTP_0000497700	PC2	-0.016	A0A0K0E646		Fibrinogen_a/b/g_C_dom, Fibrinogen-like_C	NA	Y43C5A.2	23.2026	SRAE_X000093600	79.5752	SPAL_0001661700	70.2614	SVE_0126600	52.7778
SSTP_0000221800	PC2	-0.016	A0A0K0DYA4		Calycin	NA			SRAE_2000484600	89.243	SPAL_0001153000	81.2749	SVE_1638700	82.0717
SSTP_0000608700	PC2	-0.016	A0A0K0E9A3		NA	NA			SRAE_1000344700	68.984
SSTP_0000988900	PC2	-0.016			NA	NA	wago-4	25.1553	SRAE_1000045200	69.4617	SPAL_0001641000	61.6977	SVE_0402500	62.2153
SSTP_0001024200	PC2	-0.016	A0A0K0EL99		ArAA_b-elim_lyase/Thr_aldolase, PyrdxlP-dep_Trfase_major, PyrdxlP-dep_Trfase_dom1, PyrdxlP-dep_Trfase, Threonine_aldolase	lyase activity, cellular amino acid metabolic process, catalytic activity	R102.4	48.9637	SRAE_X000242600	82.1244	SPAL_0000986200	76.943	SVE_0294700	76.6839
SSTP_0000557500	PC2	-0.016	A0A0K0E7U7		Aminotrans_3, PyrdxlP-dep_Trfase_major, PyrdxlP-dep_Trfase_dom1, PyrdxlP-dep_Trfase	transaminase activity, pyridoxal phosphate binding, catalytic activity	T09B4.8	68.4685	SRAE_1000277100	93.9189	SPAL_0000003900	93.4685	SVE_0634900	93.4685
SSTP_0000865100	PC2	-0.016	A0A0K0EGP0		NA	NA			SRAE_X000144600	77.4011	SPAL_0000385700	70.0565	SVE_1904700	70.0565
SSTP_0001013400	PC2	-0.016	A0A0K0EKZ0		Homeobox_dom, Homeobox-like_sf	DNA binding, nucleus			SRAE_2000093500	77.3109	SPAL_0000784900	59.6639	SVE_1840300	62.1849
SSTP_0000348700	PC2	-0.016	A0A0K0E1W9		Hedgehog_Hint, Hint_dom_C, Hint_dom_N, Intein_N, Hint_dom_sf	intein-mediated protein splicing, peptidase activity, proteolysis, membrane, integral component of membrane	wrt-6	28.021	SRAE_X000100500	71.6287	SPAL_0001461400	33.6252
SSTP_0000751800	PC2	-0.016	A0A0K0EDF5		Nucl_hrmn_rcpt_lig-bd, Znf_hrmn_rcpt, Nuclear_hrmn_rcpt, ThyrH_rcpt, Znf_NHR/GATA, NHR-like_dom_sf	nuclear receptor activity, steroid hormone receptor activity, sequence-specific DNA binding, DNA-binding transcription factor activity, regulation of transcription, DNA-templated, DNA binding, nucleus, zinc ion binding, metal ion binding, steroid hormone mediated signaling pathway, intracellular receptor signaling pathway	nhr-2	17.7249	SRAE_2000295400	84.3915	SPAL_0001069200	76.1905	SVE_1651600	82.8042
SSTP_0000071300	PC2	-0.016	A0A0K0DTZ7		EF_hand_dom, EF-hand-dom_pair, EF_Hand_1_Ca_BS, EF_hand_pair_protein_CML-like	calcium ion binding	H10E21.4	26.7241	SRAE_1000209300	83.6207	SPAL_0000658800	75.431	SVE_1848400	74.569
SSTP_0000122300	PC2	-0.016	A0A0K0DVF6		Nuc_sug_transpt	pyrimidine nucleotide-sugar transmembrane transport, pyrimidine nucleotide-sugar transmembrane transporter activity, Golgi membrane, integral component of membrane, membrane	ugtp-1	32.5648	SRAE_2000179700	92.5072	SPAL_0001020600	89.9135	SVE_0504000	89.9135
SSTP_0000350400	PC2	-0.016	A0A0K0E1Y5		Reeler_dom	membrane, integral component of membrane			SRAE_X000160900	87.9581	SPAL_0001282600	78.534	SVE_1699800	75.9162
SSTP_0000560900	PC2	-0.016	A0A0K0E7Y0	DNA polymerase epsilon catalytic subunit	DNA-dir_DNA_pol_B_exonuc, DNA-dir_DNA_pol_B_multi_dom, DNA-dir_DNA_pol_B, RNaseH-like_sf, DNA_pol_e_suA_C, POL2, RNaseH_sf, DNA_pol_B_C	epsilon DNA polymerase complex, DNA-directed DNA polymerase activity, nucleotide binding, DNA replication, DNA repair, DNA binding, nucleus, nucleic acid binding, zinc ion binding, transferase activity, metal ion binding, iron-sulfur cluster binding, 4 iron, 4 sulfur cluster binding, nucleotidyltransferase activity, DNA biosynthetic process	pole-1	44.7075	SRAE_1000271700	91.0863	SPAL_0001659000	52.7855	SVE_1940600	88.5794
SSTP_0001201100	PC2	-0.016	A0A0K0ERD0		NA	NA			SRAE_1000004000	82.2785	SPAL_0001189200	67.0886
SSTP_0000988700	PC2	-0.016	A0A0K0EK94		VWF_A, vWFA_dom_sf	membrane, integral component of membrane			SRAE_1000045000	58.804	SPAL_0000855400	53.9867	SVE_1053700	56.8106
SSTP_0000571300	PC2	-0.016	A0A0K0E882		Nucl_hrmn_rcpt_lig-bd, Znf_hrmn_rcpt, Nuclear_hrmn_rcpt, ThyrH_rcpt, Znf_NHR/GATA, NHR-like_dom_sf	nuclear receptor activity, steroid hormone receptor activity, sequence-specific DNA binding, DNA-binding transcription factor activity, regulation of transcription, DNA-templated, DNA binding, nucleus, zinc ion binding, metal ion binding, steroid hormone mediated signaling pathway, intracellular receptor signaling pathway	nhr-23	33.3333	SRAE_1000231300	95.0877	SPAL_0001289900	90.8772	SVE_0162100	91.4035
SSTP_0000389200	PC2	-0.016	A0A0K0E322		CD36_fam	membrane, integral component of membrane	scav-5	36.4273	SRAE_2000117700	80.9107	SPAL_0001632300	81.4361	SVE_0434400	81.7863
SSTP_0001250100	PC2	-0.016	A0A0K0ESS2		NA	membrane, integral component of membrane	R11F4.3	15.8228	SRAE_X000114500	81.3291	SPAL_0000696300	70.8861	SVE_0623900	66.2975
SSTP_0000818700	PC2	-0.016	A0A0K0EFC4	Histone H2B	Histone_H2B, Histone_H2A/H2B/H3, Histone-fold	nucleosome, protein heterodimerization activity, DNA binding, nucleus, chromosome			SRAE_1000098300	96.748	SPAL_0001573400	96.748	SVE_0025000	96.748
SSTP_0000856500	PC2	-0.016	A0A0K0EGF4		PyrdxlP-dep_de-COase, PyrdxlP-dep_Trfase_major, PyrdxlP-dep_Trfase_dom1, PyrdxlP-dep_Trfase	carboxylic acid metabolic process, pyridoxal phosphate binding, carboxy-lyase activity, catalytic activity, lyase activity	spl-2	49.2727	SRAE_X000188000	83.4545	SPAL_0001678500	76
SSTP_0000885800	PC2	-0.016	A0A0K0EHA2		C-type_lectin-like, VWF_A, C-type_lectin-like/link_sf, CTDL_fold, vWFA_dom_sf	NA	clec-59	20.9424			SPAL_0001266700	63.3508	SVE_0946200	62.3037
SSTP_0000510200	PC2	-0.016	A0A0K0E6H2		NA	membrane, integral component of membrane			SRAE_2000126700	44.898	SPAL_0000791500	34.1108	SVE_1833600	35.5685
SSTP_0000200300	PC2	-0.016	A0A0K0DXN8		SDR_fam, NAD(P)-bd_dom_sf	membrane, integral component of membrane	dhs-22	40.5405			SPAL_0000686300	82.5826	SVE_1328200	83.7838
SSTP_0000223500	PC2	-0.016	A0A0K0DYC1		Lipase_EstA/Esterase_EstB, AB_hydrolase	hydrolase activity, membrane, integral component of membrane			SRAE_2000351200	78.7671	SPAL_0001049300	78.0822	SVE_1775200	76.0274
SSTP_0000070500	PC2	-0.016	A0A0K0DTY9		Septin, P-loop_NTPase, G_SEPTIN_dom	GTP binding, nucleotide binding	unc-61	39.8907	SRAE_1000357000	78.8707	SPAL_0001533400	76.3206	SVE_0605000	76.6849
[truncated: 480 more rows]

## Sheet: S. ratti
File S4. Top 10% of genes contributing to PCA identity in each Strongyloides species
A list of the top 10% of genes contributing to PC1 and PC2 identity for each species.
Top 10% of Genes Contributing to S. ratti PC1 and PC2
geneID	PC	scores	UniProtKB	Description	InterPro	GO_term	Ce_geneID	Ce_percent_homology	WBgeneID	In.subclade_geneID	In.subclade_percent_homology	Out.subclade_geneID	Out.subclade_percent_homology	Out2.subclade_geneID	Out2.subclade_percent_homology
SRAE_X000158300	PC1	0.045	A0A090KR34	Acetylcholinesterase	Cholinesterase, CarbesteraseB, AB_hydrolase	cholinesterase activity			WBGene00267156	SSTP_0001054300	56.8556	SPAL_0000327900	38.574
SRAE_2000456500	PC1	0.043	A0A090LP04	Metalloendopeptidase	Peptidase_M12A, Peptidase_Metallo, MetalloPept_cat_dom_sf	zinc ion binding, metalloendopeptidase activity, metallopeptidase activity, proteolysis, metal ion binding, hydrolase activity, peptidase activity			WBGene00264797	SSTP_0000383400	64.9077	SPAL_0000599300	54.3536
SRAE_2000490200	PC1	0.042	D2DS69	Aspartic peptidase family and Aspartic peptidase domain-containing protein; Aspartic peptidase family and Aspartic peptidase domain-containing protein; Aspartic protease 2A; Aspartic protease 2A	Aspartic_peptidase_A1, Aspartic_peptidase_AS, Peptidase_aspartic_dom_sf, PEPTIDASE_A1, Pepsin-like_dom	aspartic-type endopeptidase activity, proteolysis, hydrolase activity, peptidase activity			WBGene00265149	SSTP_0000164600	72.2749
SRAE_2000453200	PC1	0.042	A0A090LQN4	Metalloendopeptidase	Peptidase_M12A, EGF-like_CS, MetalloPept_cat_dom_sf	metalloendopeptidase activity, metallopeptidase activity, proteolysis, metal ion binding, hydrolase activity, peptidase activity			WBGene00264764	SSTP_0000942000	26.6491	SPAL_0000129200	14.5119
SRAE_2000453700	PC1	0.042	A0A090LQN7	Metalloendopeptidase	EGF-like_dom, Peptidase_M12A, EGF-like_CS, MetalloPept_cat_dom_sf, Sperma_CUB_dom_sf	metalloendopeptidase activity, metallopeptidase activity, proteolysis, membrane, integral component of membrane, metal ion binding, hydrolase activity, peptidase activity			WBGene00264769
SRAE_0000081500	PC1	0.041			NA	NA
SRAE_X000201100	PC1	0.041	A0A090MQ52	Zinc metalloproteinase	Peptidase_M12A, Peptidase_Metallo, EGF-like_CS, Metallopeptidase_nem, Astacin-like_dom	molting cycle, collagen and cuticulin-based cuticle, zinc ion binding, metalloendopeptidase activity, metallopeptidase activity, proteolysis, membrane, integral component of membrane, extracellular region			WBGene00267589	SSTP_0000274400	51.9669	SPAL_0001063200	38.5093
SRAE_X000066000	PC1	0.041	A0A090N0V2	Trypsin Inhibitor-like, cysteine rich domain-containing protein	EGF-like_dom, TIL_dom, Ser_inhib-like_sf	NA			WBGene00266219	SSTP_0000668100	27.2727	SPAL_0000620600	9.18561
SRAE_X000014000	PC1	0.04	A0A090LLW0	Prolyl endopeptidase	Peptidase_S9, Peptidase_S9A, Pept_S9A_N, AB_hydrolase	serine-type exopeptidase activity, serine-type endopeptidase activity, serine-type peptidase activity, proteolysis			WBGene00265696	SSTP_0000289100	45.9888	SPAL_0001558900	37.5
SRAE_0000047500	PC1	0.04	A0A090L1J9	Acetylcholinesterase	Cholinesterase, CarbesteraseB, AB_hydrolase	cholinesterase activity			WBGene00256219			SPAL_0000327900	37.8049
SRAE_2000436100	PC1	0.04	A0A090LNI9		NA	NA			WBGene00264592
SRAE_2000456300	PC1	0.04	A0A090LJA3	Acetylcholinesterase	Cholinesterase, CarbesteraseB, AB_hydrolase	cholinesterase activity			WBGene00264795	SSTP_0000383600	54.2609	SPAL_0000599400	49.2174
SRAE_0000082200	PC1	0.04	A0A090L0U6	Trypsin Inhibitor-like, cysteine rich domain-containing protein	TIL_dom, Ser_inhib-like_sf	NA			WBGene00256582	SSTP_0000668100	30.8696	SPAL_0000620600	14.5652
SRAE_2000461510	PC1	0.04	B5TSQ3	Prolyl endopeptidase	Peptidase_S9, Peptidase_S9A, Pept_S9_AS, Pept_S9A_N, AB_hydrolase	serine-type exopeptidase activity, serine-type endopeptidase activity, serine-type peptidase activity, proteolysis			WBGene00264847	SSTP_0001108600	58.831
SRAE_2000071300	PC1	0.04	A0A090L8C3		NA	NA			WBGene00260911	SSTP_0000391000	28.6458	SPAL_0001106000	10.6771
SRAE_X000066100	PC1	0.04	A0A090LUN3	Zinc metalloproteinase	Peptidase_M12A, Peptidase_Metallo, EGF-like_CS, Metallopeptidase_nem, Astacin-like_dom, Sperma_CUB_dom_sf	molting cycle, collagen and cuticulin-based cuticle, zinc ion binding, metalloendopeptidase activity, metallopeptidase activity, proteolysis, extracellular region			WBGene00266220	SSTP_0000274400	55.5785	SPAL_0001063200	38.4298
SRAE_2000489900	PC1	0.039	D2DS75	Aspartic peptidase family and Aspartic peptidase domain-containing protein	Aspartic_peptidase_A1, Aspartic_peptidase_AS, Peptidase_aspartic_dom_sf, PEPTIDASE_A1, Pepsin-like_dom	aspartic-type endopeptidase activity, proteolysis, hydrolase activity, peptidase activity			WBGene00265146	SSTP_0000164700	71.8346
SRAE_2000460300	PC1	0.039	A0A090LJE5	Zinc metalloproteinase	Peptidase_M12A, Peptidase_Metallo, Metallopeptidase_nem, Astacin-like_dom, Sperma_CUB_dom_sf	molting cycle, collagen and cuticulin-based cuticle, zinc ion binding, metalloendopeptidase activity, metallopeptidase activity, proteolysis, extracellular region			WBGene00264835	SSTP_0000382200	54.4872	SPAL_0001538600	39.7436
SRAE_X000192000	PC1	0.039	A0A090KS40		NA	NA			WBGene00267497
SRAE_X000168600	PC1	0.039	A0A090KQY7	Prolyl endopeptidase	Peptidase_S9, Peptidase_S9A, Pept_S9A_N, AB_hydrolase	serine-type exopeptidase activity, serine-type endopeptidase activity, serine-type peptidase activity, proteolysis, membrane, integral component of membrane			WBGene00267260	SSTP_0000670700	38.9333
SRAE_2000515500	PC1	0.039	A0A090LL20		NA	NA			WBGene00265409	SSTP_0000636100	7.1222	SPAL_0001169400	19.5951
SRAE_X000200900	PC1	0.039	A0A090KSA5		NA	NA			WBGene00267587
SRAE_2000455300	PC1	0.039	A0A090LJ95	Carboxylic ester hydrolase	Cholinesterase, CarbesteraseB, Carboxylesterase_B_AS, AB_hydrolase	cholinesterase activity, hydrolase activity			WBGene00264785
SRAE_X000200800	PC1	0.038	A0A090KS01		NA	NA			WBGene00267586
SRAE_X000065700	PC1	0.038	A0A090LN95	Prolyl endopeptidase	Peptidase_S9, Peptidase_S9A, Pept_S9A_N, AB_hydrolase	serine-type exopeptidase activity, serine-type endopeptidase activity, serine-type peptidase activity, proteolysis			WBGene00266216	SSTP_0000668200	70.5803
SRAE_2000490300	PC1	0.038	A0A090N090	Aspartic peptidase family and Aspartic peptidase domain-containing protein	Aspartic_peptidase_A1, Aspartic_peptidase_AS, Peptidase_aspartic_dom_sf, PEPTIDASE_A1, Pepsin-like_dom	aspartic-type endopeptidase activity, proteolysis, hydrolase activity, peptidase activity			WBGene00265150	SSTP_0000164600	70.8531
SRAE_2000482710	PC1	0.037	A0A090LKJ0	Zinc metalloproteinase	EGF-like_dom, Peptidase_M12A, Peptidase_Metallo, EGF-like_CS, Metallopeptidase_nem, Astacin-like_dom	molting cycle, collagen and cuticulin-based cuticle, zinc ion binding, metalloendopeptidase activity, metallopeptidase activity, proteolysis, extracellular region			WBGene00265073	SSTP_0000382300	66.2393	SPAL_0001538600	38.8889
SRAE_1000203100	PC1	0.037	A0A090L6P9	Prolyl endopeptidase	Peptidase_S9, Peptidase_S9A, Pept_S9A_N, AB_hydrolase	serine-type exopeptidase activity, serine-type endopeptidase activity, serine-type peptidase activity, proteolysis			WBGene00258643	SSTP_0000289100	42.4681	SPAL_0001558900	34.6383
SRAE_X000200700	PC1	0.037	A0A090KYJ6		NA	NA			WBGene00267585
SRAE_0000082100	PC1	0.037	A0A090KWE7	Prolyl endopeptidase	Peptidase_S9, Peptidase_S9A, Pept_S9A_N, AB_hydrolase	serine-type exopeptidase activity, serine-type endopeptidase activity, serine-type peptidase activity, proteolysis			WBGene00256581	SSTP_0000670700	38.5827
SRAE_X000201000	PC1	0.037	A0A090KWP6		NA	NA			WBGene00267588
SRAE_0000007900	PC1	0.037	A0A090KYI7		NA	NA			WBGene00255816	SSTP_0000381000	13.3159	SPAL_0000391400	11.4883
SRAE_2000455000	PC1	0.037	A0A090LNY9	Metalloendopeptidase	Peptidase_M12A, Peptidase_Metallo, MetalloPept_cat_dom_sf	zinc ion binding, metalloendopeptidase activity, metallopeptidase activity, proteolysis, metal ion binding, hydrolase activity, peptidase activity			WBGene00264782	SSTP_0000113700	64.5503	SPAL_0000598600	54.4974
SRAE_X000014200	PC1	0.037	A0A090LRL0		NA	NA			WBGene00265698
SRAE_0000008200	PC1	0.037	A0A090KTV1	Metalloendopeptidase	CUB_dom, Peptidase_M12A, Peptidase_Metallo, MetalloPept_cat_dom_sf, Sperma_CUB_dom_sf	zinc ion binding, metalloendopeptidase activity, metallopeptidase activity, proteolysis, metal ion binding, hydrolase activity, peptidase activity			WBGene00255819			SPAL_0001389400	54.8969
SRAE_X000168100	PC1	0.037	A0A090KQY1		NA	NA			WBGene00267255
SRAE_2000467100	PC1	0.037	A0A090LPA8		NA	NA			WBGene00264907
SRAE_2000289800	PC1	0.036	A0A090LL44	Metalloendopeptidase	Peptidase_M12A, Peptidase_Metallo, EGF-like_CS, MetalloPept_cat_dom_sf	zinc ion binding, metalloendopeptidase activity, metallopeptidase activity, proteolysis, membrane, integral component of membrane, metal ion binding, hydrolase activity, peptidase activity			WBGene00263112			SPAL_0001229900	30.4556
SRAE_2000457710	PC1	0.036	A0A090LQR9	Metallopeptidase, catalytic domain-containing protein	MetalloPept_cat_dom_sf	metallopeptidase activity, proteolysis			WBGene00264809	SSTP_0001103400	58.1717	SPAL_0001303100	29.0859
SRAE_2000475600	PC1	0.036	A0A090LPK5		NA	NA			WBGene00264998
SRAE_1000291800	PC1	0.036	A0A090LAX3	Carboxylic ester hydrolase	Cholinesterase, CarbesteraseB, Carboxylesterase_B_AS, AB_hydrolase	cholinesterase activity, hydrolase activity			WBGene00259535	SSTP_0000031200	71.5548	SPAL_0000716800	62.5442
SRAE_2000506800	PC1	0.036	A0A090LQH7		NA	NA			WBGene00265320
SRAE_X000191800	PC1	0.036	A0A090KYB9		NA	NA			WBGene00267495
SRAE_1000182600	PC1	0.035	A0A090L199	CAP domain-containing protein	CAP_domain, CAP_sf	NA			WBGene00258435
SRAE_X000055800	PC1	0.035	A0A090LND3		NA	NA			WBGene00266117
SRAE_2000523900	PC1	0.035	A0A090LLC4	Zinc metalloproteinase	CUB_dom, Peptidase_M12A, Peptidase_Metallo, EGF-like_CS, Metallopeptidase_nem, Astacin-like_dom, Sperma_CUB_dom_sf	molting cycle, collagen and cuticulin-based cuticle, zinc ion binding, metalloendopeptidase activity, metallopeptidase activity, proteolysis, extracellular region			WBGene00265499	SSTP_0000966400	55.9917	SPAL_0000532900	44.2149
SRAE_X000055700	PC1	0.035	A0A090LN30		NA	NA			WBGene00266116	SSTP_0000933400	43.956
SRAE_X000196000	PC1	0.035	A0A090KRW5		NA	NA			WBGene00267536
SRAE_X000201200	PC1	0.035	A0A090KYJ9		NA	NA			WBGene00267590
SRAE_1000075800	PC1	0.035	A0A090KYG6	Cholinesterase family and Carboxylesterase, type B domain-containing protein	Cholinesterase, CarbesteraseB, AB_hydrolase	cholinesterase activity			WBGene00257356
SRAE_X000221100	PC1	0.035	A0A090KX71	Astacin-like metalloendopeptidase	EGF-like_dom, Peptidase_M12A, Peptidase_Metallo, EGF-like_CS, MetalloPept_cat_dom_sf	zinc ion binding, metalloendopeptidase activity, metallopeptidase activity, proteolysis, metal ion binding, hydrolase activity, peptidase activity	hch-1	23.6702	WBGene00267788
SRAE_X000026300	PC1	0.035	A0A090N0M2		NA	NA			WBGene00265819
SRAE_0000057900	PC1	0.035	A0A090KVB1		NA	NA			WBGene00256325	SSTP_0000828800	37
SRAE_X000124900	PC1	0.035	A0A090KUF3		NA	membrane, integral component of membrane			WBGene00266815
SRAE_2000499920	PC1	0.034	A0A090MFY0		NA	NA			WBGene00265250
SRAE_2000511800	PC1	0.034	A0A090N0D3	Glycosyl transferase, family 14-containing protein	Glyco_trans_14	acetylglucosaminyltransferase activity, membrane, integral component of membrane, transferase activity	T14B4.9	16.4725	WBGene00265372	SSTP_0000941600	62.396	SPAL_0000583900	58.2363
SRAE_X000200300	PC1	0.034	A0A090KRZ6		NA	NA			WBGene00267581
SRAE_2000499200	PC1	0.034	A0A090LQA1		NA	membrane, integral component of membrane			WBGene00265239
SRAE_X000222310	PC1	0.034	A0A090MLP1		NA	NA			WBGene00267801
SRAE_0000077300	PC1	0.034	A0A090L2H7	Trypsin Inhibitor-like, cysteine rich domain-containing protein	TIL_dom, Ser_inhib-like_sf	NA			WBGene00256532	SSTP_0000668100	44.9367	SPAL_0000620600	33.5443
SRAE_2000498800	PC1	0.034	A0A090N0A7	Phloem filament PP1 domain-containing protein	NA	NA			WBGene00265235
SRAE_2000071900	PC1	0.033	A0A090LD36		EGF-like_CS	NA			WBGene00260918	SSTP_0000391000	30.8901	SPAL_0001106000	11.7801
SRAE_X000169100	PC1	0.033	A0A090KQZ2	Prolyl endopeptidase	Peptidase_S9, Peptidase_S9A, EF_Hand_1_Ca_BS, Pept_S9A_N, AB_hydrolase	serine-type exopeptidase activity, serine-type endopeptidase activity, serine-type peptidase activity, proteolysis			WBGene00267266	SSTP_0000670700	45.8388
SRAE_1000300800	PC1	0.033	A0A090LB85		NA	NA			WBGene00259625	SSTP_0000838900	12.7717
SRAE_0000000100	PC1	0.033	A0A090MRL1	Acetylcholinesterase	Cholinesterase, CarbesteraseB, AB_hydrolase	cholinesterase activity			WBGene00255737			SPAL_0000793700	45.2465
SRAE_X000055900	PC1	0.033	A0A090LSR9		NA	NA			WBGene00266118
SRAE_X000014300	PC1	0.033	A0A090N0J8		NA	NA			WBGene00265699
SRAE_X000124800	PC1	0.033	A0A090KUF3		NA	membrane, integral component of membrane			WBGene00266814
SRAE_X000037600	PC1	0.033	A0A090LTS7		NA	NA			WBGene00265935
SRAE_2000482300	PC1	0.033	A0A090LPY3	Metalloendopeptidase	Peptidase_M12A, Peptidase_Metallo, MetalloPept_cat_dom_sf	zinc ion binding, metalloendopeptidase activity, metallopeptidase activity, proteolysis, metal ion binding, hydrolase activity, peptidase activity			WBGene00265069			SPAL_0000607100	32.5926
SRAE_2000460700	PC1	0.033	A0A090LQU4		NA	membrane, integral component of membrane			WBGene00264839	SSTP_0000538800	35.6213
SRAE_2000125000	PC1	0.033	A0A090LA16	CAP domain-containing protein	CAP_sf	NA			WBGene00261452
SRAE_X000222300	PC1	0.033	A0A090KZ20		NA	NA			WBGene00267800
SRAE_2000526700	PC1	0.032	A0A090LR42	Prolyl endopeptidase	Peptidase_S9, Peptidase_S9A, Pept_S9A_N, AB_hydrolase	serine-type exopeptidase activity, serine-type endopeptidase activity, serine-type peptidase activity, proteolysis			WBGene00265527	SSTP_0001019400	64.6904	SPAL_0001559000	37.8129
SRAE_X000043200	PC1	0.032	A0A090LMN6	Histidine phosphatase superfamily, clade-2-containing protein	His_Pase_clade-2, His_PPase_superfam, Acid_Pase_AS	NA	pho-7	25.6614	WBGene00265991	SSTP_0000637900	65.3439
SRAE_2000478600	PC1	0.032	A0A090LRC8	CAP domain-containing protein	CRISP-related, CAP_domain, CAP_sf	NA	scl-12	15.678	WBGene00265030
SRAE_X000147300	PC1	0.032	A0A090KQE1	Metalloendopeptidase	Peptidase_M12A, Peptidase_Metallo, MetalloPept_cat_dom_sf	zinc ion binding, metalloendopeptidase activity, metallopeptidase activity, proteolysis, membrane, integral component of membrane, metal ion binding, hydrolase activity, peptidase activity			WBGene00267045	SSTP_0000868100	58.3333	SPAL_0000587600	36.4286
SRAE_X000043100	PC1	0.032	A0A090LTY4	Poly(U)-specific endoribonuclease	EndoU_C, EndoU-like, ENDOU	endoribonuclease activity, RNA phosphodiester bond hydrolysis, endonucleolytic	endu-1	41.1003	WBGene00265990	SSTP_0000637800	67.9612	SPAL_0000176600	39.4822
SRAE_2000498900	PC1	0.032	A0A090LRZ1		NA	membrane, integral component of membrane			WBGene00265236
SRAE_1000260300	PC1	0.032	A0A090MWV6	Trypsin Inhibitor-like, cysteine rich domain-containing protein	TIL_dom, Ser_inhib-like_sf	NA			WBGene00259219	SSTP_0001186000	57.6512	SPAL_0000171400	54.4484
SRAE_2000440700	PC1	0.032	A0A090LQD3	Metalloendopeptidase	Peptidase_M12A, Peptidase_Metallo, MetalloPept_cat_dom_sf, Sperma_CUB_dom_sf	zinc ion binding, metalloendopeptidase activity, metallopeptidase activity, proteolysis, metal ion binding, hydrolase activity, peptidase activity			WBGene00264639
SRAE_2000408800	PC1	0.032	A0A090MZS4	Metalloendopeptidase	Peptidase_M12A, Peptidase_Metallo, EGF-like_CS, MetalloPept_cat_dom_sf	zinc ion binding, metalloendopeptidase activity, metallopeptidase activity, proteolysis, metal ion binding, hydrolase activity, peptidase activity			WBGene00264316	SSTP_0000109300	81.75	SPAL_0001315500	74.25
SRAE_2000467900	PC1	0.032	A0A090LJN5		NA	NA			WBGene00264915
SRAE_0000028500	PC1	0.032	A0A090KZ57		NA	NA			WBGene00256027
SRAE_X000168300	PC1	0.031	A0A090KVP1		NA	NA			WBGene00267257
SRAE_X000168900	PC1	0.031	A0A090MPB8	Prolyl endopeptidase	Peptidase_S9, Peptidase_S9A, EF_Hand_1_Ca_BS, Pept_S9A_N, AB_hydrolase	serine-type exopeptidase activity, serine-type endopeptidase activity, serine-type peptidase activity, proteolysis			WBGene00267264	SSTP_0000670700	46.2351
SRAE_2000499700	PC1	0.031	A0A090LQA5		NA	membrane, integral component of membrane			WBGene00265245
SRAE_X000224300	PC1	0.031	A0A090KZ39		NA	NA			WBGene00267823
SRAE_2000451500	PC1	0.031	A0A090LNV5	Transthyretin-like family-containing protein	Transthyretin-like, Transthyretin-like_sf	extracellular space			WBGene00264747	SSTP_0000365900	40.9938	SPAL_0001248050	33.5404
SRAE_2000326000	PC1	0.031			NA	NA						SPAL_0000010900	41.6887
SRAE_1000182800	PC1	0.031	A0A090L612	CAP domain-containing protein	CAP_domain, CAP_sf	NA			WBGene00258437
SRAE_2000465000	PC1	0.031	A0A090LQX6		NA	NA			WBGene00264884
SRAE_2000465200	PC1	0.031	A0A090LQX6		NA	NA			WBGene00264887
SRAE_0000079600	PC1	0.031	A0A090L0Q6	Metalloendopeptidase	Peptidase_M12A, MetalloPept_cat_dom_sf	metalloendopeptidase activity, metallopeptidase activity, proteolysis, metal ion binding, hydrolase activity, peptidase activity			WBGene00256555			SPAL_0000607100	28.9277
SRAE_0000045600	PC1	0.031			NA	NA				SSTP_0001008900	41.3934	SPAL_0000627800	45.4918
SRAE_1000021400	PC1	0.031	A0A090MU24	Moulting cycle MLT-10-like protein family-containing protein	MLT-10-like	NA	mltn-9	38.2258	WBGene00256808	SSTP_0001197400	60	SPAL_0001097100	77.5806
SRAE_1000045800	PC1	0.031	A0A090L420	Lipase, class 3 family-containing protein	Fungal_lipase-like, AB_hydrolase	lipid metabolic process, hydrolase activity	Y51A2B.4	27.7439	WBGene00257054	SSTP_0000990200	33.5366	SPAL_0001300800	35.061
SRAE_1000296600	PC1	0.031	A0A090L9D2		NA	NA			WBGene00259583
SRAE_X000168400	PC1	0.031	A0A090MPB5		NA	membrane, integral component of membrane			WBGene00267258
SRAE_X000018500	PC1	0.031	A0A090LLZ5		NA	NA			WBGene00265741	SSTP_0000643600	36.6906
SRAE_2000453600	PC1	0.031	A0A090N014	Metalloendopeptidase	Peptidase_M12A, Peptidase_Metallo, EGF-like_CS, MetalloPept_cat_dom_sf	zinc ion binding, metalloendopeptidase activity, metallopeptidase activity, proteolysis, metal ion binding, hydrolase activity, peptidase activity			WBGene00264768	SSTP_0000368000	50.9804
SRAE_2000071700	PC1	0.031	A0A090LET4		EGF-like_CS	NA			WBGene00260915	SSTP_0000391000	31.5104	SPAL_0001106000	10.1562
SRAE_2000124400	PC1	0.031	A0A090L9X3	CAP domain-containing protein	CAP_sf	membrane, integral component of membrane			WBGene00261446	SSTP_0001052900	23.7458
SRAE_0000077900	PC1	0.03	A0A090KVZ2		NA	NA			WBGene00256538
SRAE_1000182700	PC1	0.03	A0A090L1J4	CAP domain-containing protein	NA	NA			WBGene00258436
SRAE_2000436000	PC1	0.03	A0A090LJ38		NA	NA			WBGene00264591
SRAE_X000055600	PC1	0.03	A0A090LUF1		NA	NA			WBGene00266115	SSTP_0000933400	42.5743
SRAE_2000508500	PC1	0.03	A0A090LKU6		NA	NA			WBGene00265339
SRAE_0000057800	PC1	0.03	A0A090L1T3		NA	NA			WBGene00256324
SRAE_2000067500	PC1	0.03	A0A090L8C2	Transthyretin-like family-containing protein	Transthyretin-like, Transthyretin-like_sf	extracellular space			WBGene00260872	SSTP_0000778600	34.2466	SPAL_0000643600	40.411
SRAE_X000055500	PC1	0.03	A0A090N0T1		NA	NA			WBGene00266114	SSTP_0000933400	29.6703
SRAE_2000498700	PC1	0.03	A0A090LQ98		NA	membrane, integral component of membrane			WBGene00265234
SRAE_X000146500	PC1	0.03	A0A090KQU0	Acetylcholinesterase	Cholinesterase, CarbesteraseB, AB_hydrolase	cholinesterase activity			WBGene00267036
SRAE_1000041700	PC1	0.03	A0A090MUC3		NA	NA			WBGene00257013	SSTP_0000268200	66.0494	SPAL_0000389600	50.3086
SRAE_X000055300	PC1	0.03	A0A090LND0		NA	NA			WBGene00266112
SRAE_2000435900	PC1	0.03	A0A090LIU6		NA	NA			WBGene00264589	SSTP_0000254500	35.2113
SRAE_0000022900	PC1	0.03	A0A090L0S6	Proteinase inhibitor I25, cystatin domain-containing protein	NA	membrane, integral component of membrane			WBGene00255969
SRAE_X000246200	PC1	0.03	A0A090KZW1		NA	NA			WBGene00268048	SSTP_0001052700	44.186
SRAE_X000256900	PC1	0.03	A0A090KY91		NA	NA			WBGene00268156	SSTP_0001052700	44.186
SRAE_1000182900	PC1	0.03	A0A090MWA2	CAP domain-containing protein	CAP_domain, CAP_sf	NA			WBGene00258438
SRAE_2000420700	PC1	0.03	A0A090MZU8	CAP domain-containing protein	CAP_sf	membrane, integral component of membrane			WBGene00264436	SSTP_0000480100	51.2422
SRAE_2000499810	PC1	0.03	A0A090N6B7		NA	membrane, integral component of membrane			WBGene00265247
SRAE_2000485800	PC1	0.029	A0A090LQ09	Netrin domain and Proteinase inhibitor I35, tissue inhibitor of metalloproteinase family and Tissue inhibitor of metalloproteinases-like, OB-fold domain-containing protein	Netrin_domain, TIMP, TIMP-like_OB-fold	metalloendopeptidase inhibitor activity, protein binding, extracellular region, negative regulation of endopeptidase activity			WBGene00265104	SSTP_0000220800	44.8052	SPAL_0001154000	39.6104
SRAE_X000023200	PC1	0.029	A0A090LRS9		NA	NA			WBGene00265788	SSTP_0000244900	37.1429
SRAE_X000143800	PC1	0.029	A0A090KWW1	Astacin-like metalloendopeptidase	Peptidase_M12A, EGF-like_CS, MetalloPept_cat_dom_sf	metalloendopeptidase activity, metallopeptidase activity, proteolysis			WBGene00267007	SSTP_0000866000	65.3747
SRAE_2000046200	PC1	0.029	A0A090L7M0	Proteinase inhibitor I25, cystatin domain-containing protein	Cystatin_dom	cysteine-type endopeptidase inhibitor activity, negative regulation of endopeptidase activity			WBGene00260656
SRAE_1000182300	PC1	0.029	A0A090L606	CAP domain-containing protein	CAP_domain, CAP_sf	NA			WBGene00258432
SRAE_2000450700	PC1	0.029	A0A090LQL3	Metalloendopeptidase	CUB_dom, Peptidase_M12A, Peptidase_Metallo, MetalloPept_cat_dom_sf, Sperma_CUB_dom_sf	zinc ion binding, metalloendopeptidase activity, metallopeptidase activity, proteolysis, metal ion binding, hydrolase activity, peptidase activity			WBGene00264739	SSTP_0001115000	51.6049	SPAL_0001248100	28.3951
SRAE_2000077300	PC1	0.029	A0A090LD83	CAP domain-containing protein	CAP_domain, CAP_sf	membrane, integral component of membrane			WBGene00260973	SSTP_0000517600	36.014	SPAL_0001689800	18.1818
SRAE_X000012300	PC1	0.029	A0A090LRJ9	Metalloendopeptidase	CUB_dom, Peptidase_M12A, EGF-like_CS, MetalloPept_cat_dom_sf	metalloendopeptidase activity, metallopeptidase activity, proteolysis, metal ion binding, hydrolase activity, peptidase activity			WBGene00265678	SSTP_0000004000	50	SPAL_0000973300	36.1979
SRAE_2000073200	PC1	0.029			NA	NA						SPAL_0000705800	20.8633
SRAE_2000525500	PC1	0.029	A0A090LLE2	Metalloendopeptidase	Peptidase_M12A, Peptidase_Metallo, EGF-like_CS, MetalloPept_cat_dom_sf, Sperma_CUB_dom_sf	zinc ion binding, metalloendopeptidase activity, metallopeptidase activity, proteolysis, metal ion binding, hydrolase activity, peptidase activity			WBGene00265515	SSTP_0000965100	39.4541
SRAE_X000037700	PC1	0.029	A0A090LMH7		NA	NA			WBGene00265936
SRAE_2000453500	PC1	0.029	A0A090LNX2	Metalloendopeptidase	Peptidase_M12A, EGF-like_CS, MetalloPept_cat_dom_sf, NAS-36, Sperma_CUB_dom_sf	molting cycle, collagen and cuticulin-based cuticle, metalloendopeptidase activity, metallopeptidase activity, proteolysis, metal ion binding, hydrolase activity, peptidase activity			WBGene00264767	SSTP_0000368000	46.4646
SRAE_0000008000	PC1	0.029	A0A090MRS4		NA	NA			WBGene00255817	SSTP_0000381000	13.9108	SPAL_0000391400	12.8609
SRAE_2000485600	PC1	0.029	A0A090LKC2	Netrin domain and Proteinase inhibitor I35, tissue inhibitor of metalloproteinase family and Tissue inhibitor of metalloproteinases-like, OB-fold domain-containing protein	Netrin_domain, TIMP, TIMP-like_OB-fold	metalloendopeptidase inhibitor activity, protein binding, extracellular region, negative regulation of endopeptidase activity			WBGene00265102	SSTP_0000220800	49.6774	SPAL_0001154000	44.5161
SRAE_2000126600	PC1	0.029	A0A090LEL8	CAP domain-containing protein	CAP_domain, CAP_sf	NA			WBGene00261469	SSTP_0000510100	36.3934
SRAE_2000457510	PC1	0.029	A0A090LP14	CAP domain-containing protein	CRISP-related, CAP_domain, CAP_sf	NA			WBGene00264807	SSTP_0001103600	64.1667	SPAL_0000493600	7.91667
SRAE_2000467600	PC1	0.029	A0A090LPB3		NA	NA			WBGene00264912
SRAE_2000357800	PC1	0.029	A0A090MZH1	Metalloendopeptidase	CUB_dom, Peptidase_M12A, Peptidase_Metallo, MetalloPept_cat_dom_sf, Sperma_CUB_dom_sf	zinc ion binding, metalloendopeptidase activity, metallopeptidase activity, proteolysis, metal ion binding, hydrolase activity, peptidase activity	hch-1	26.7327	WBGene00263801	SSTP_0000228800	55.6931	SPAL_0001054700	50.2475
SRAE_2000482400	PC1	0.029	A0A090N074	Metalloendopeptidase	Peptidase_M12A, Peptidase_Metallo, EGF-like_CS, MetalloPept_cat_dom_sf	zinc ion binding, metalloendopeptidase activity, metallopeptidase activity, proteolysis, metal ion binding, hydrolase activity, peptidase activity			WBGene00265070	SSTP_0000382600	39.0123	SPAL_0001394900	8.64198
SRAE_1000182400	PC1	0.029	A0A090MWA0	CAP domain-containing protein	CAP_domain, CAP_sf	membrane, integral component of membrane			WBGene00258433
SRAE_2000499820	PC1	0.029	A0A090MLN5		NA	NA			WBGene00265248
SRAE_0000077700	PC1	0.029	A0A090MTM4		NA	NA			WBGene00256536
SRAE_X000017200	PC1	0.029	A0A090LRN6	Soluble calcium-activated nucleotidase 1	Apyrase, Apyrase_sf	nucleoside-diphosphatase activity, calcium ion binding, membrane, integral component of membrane	ZK563.7	30.9278	WBGene00265728	SSTP_0000640500	70.1031	SPAL_0000057400	62.3711
SRAE_0000078000	PC1	0.029	A0A090KW77		NA	NA			WBGene00256539	SSTP_0000933400	39.7959
SRAE_X000062100	PC1	0.029	A0A090LUJ7	Acetylcholinesterase	Cholinesterase, CarbesteraseB, AB_hydrolase	cholinesterase activity			WBGene00266180	SSTP_0000670900	59.0361	SPAL_0000325200	58.864
SRAE_X000062000	PC1	0.029	A0A090N0U4	Acetylcholinesterase	Cholinesterase, CarbesteraseB, AB_hydrolase	cholinesterase activity			WBGene00266179	SSTP_0000670900	59.7246	SPAL_0000325200	59.2083
SRAE_X000168500	PC1	0.029	A0A090KXF4	Prolyl endopeptidase	Peptidase_S9, Peptidase_S9A, Pept_S9A_N, AB_hydrolase	serine-type exopeptidase activity, serine-type endopeptidase activity, serine-type peptidase activity, proteolysis, membrane, integral component of membrane			WBGene00267259	SSTP_0000670700	37.3193
SRAE_2000522300	PC1	0.028	A0A090LQY9	Purple acid phosphatase	Calcineurin-like_PHP_ApaH, Purple_acid_Pase-like_N, Purple_acid_Pase_N, Purple_acid_PPase_C_dom, Metallo-depent_PP-like, MPP_PAP	acid phosphatase activity, metal ion binding, hydrolase activity, dephosphorylation			WBGene00265481	SSTP_0000647800	40	SPAL_0001067000	28.6598
SRAE_X000158500	PC1	0.028	A0A090MP27	Acetylcholinesterase	Cholinesterase, CarbesteraseB, AB_hydrolase	cholinesterase activity			WBGene00267158			SPAL_0000327900	34.8958
SRAE_X000168800	PC1	0.028	A0A090KVP6	Prolyl endopeptidase	Pept_S9A_N, AB_hydrolase	serine-type exopeptidase activity, serine-type endopeptidase activity, membrane, integral component of membrane, proteolysis			WBGene00267263
SRAE_1000260200	PC1	0.028	A0A090L8A0	Trypsin Inhibitor-like, cysteine rich domain-containing protein	TIL_dom, Ser_inhib-like_sf	NA			WBGene00259218	SSTP_0001185900	64.1196	SPAL_0000171500	35.8804
SRAE_0000078700	PC1	0.028	A0A090MTN6		NA	NA			WBGene00256546
SRAE_2000499500	PC1	0.028	A0A090LKL2		NA	membrane, integral component of membrane			WBGene00265243
SRAE_1000059800	PC1	0.028	A0A090KXT6	Phosphate-regulating neutral endopeptidase	Peptidase_M13, Peptidase_M13_C, MetalloPept_cat_dom_sf, Peptidase_M13_dom_2	metalloendopeptidase activity, metallopeptidase activity, proteolysis			WBGene00257195	SSTP_0000528300	58.0851	SPAL_0001644400	44.8936
SRAE_X000087000	PC1	0.028	A0A090LP54		NA	NA			WBGene00266432	SSTP_0000494200	64	SPAL_0001207600	57
SRAE_2000130200	PC1	0.028	A0A0R3V895	Cysteine-rich secretory protein, allergen V5/Tpx-1-related family and CAP domain-containing protein	CRISP-related, CAP_domain, CAP_sf	membrane, integral component of membrane			WBGene00261505	SSTP_0000808500	35.9249
SRAE_2000527100	PC1	0.028	A0A090LLP5	CAP domain-containing protein	CAP_sf	NA			WBGene00265531	SSTP_0001019100	35.4515	SPAL_0000870000	22.408
SRAE_2000453100	PC1	0.028	A0A090N013		NA	NA			WBGene00264763			SPAL_0001715200	21.1111
SRAE_2000486100	PC1	0.028	A0A090LKC3	Netrin domain and Proteinase inhibitor I35, tissue inhibitor of metalloproteinase family and Tissue inhibitor of metalloproteinases-like, OB-fold domain-containing protein	Netrin_domain, TIMP, TIMP-like_OB-fold	metalloendopeptidase inhibitor activity, protein binding, extracellular region, negative regulation of endopeptidase activity			WBGene00265107	SSTP_0000220800	45.098	SPAL_0001154000	43.1373
SRAE_X000038800	PC1	0.028	A0A090LMT5		NA	NA			WBGene00265947
SRAE_X000222200	PC1	0.028	A0A090KZ20		NA	NA			WBGene00267799
SRAE_2000124300	PC1	0.028	A0A090LGC5	CAP domain-containing protein	CRISP-related, CAP_domain, CAP_sf	NA			WBGene00261445			SPAL_0000019700	21.1073
SRAE_X000247300	PC1	0.028	A0A090KY63	ShKT domain-containing protein	ShKT_dom	NA			WBGene00268060	SSTP_0000531600	14.3137
SRAE_1000092400	PC1	0.027	A0A090L597		NA	NA			WBGene00257524	SSTP_0001147600	60.1071	SPAL_0001513300	22.3561
SRAE_X000134600	PC1	0.027	A0A090KUQ2	Deoxyribonuclease II	DNase_II	deoxyribonuclease II activity, DNA metabolic process	nuc-1	41.1141	WBGene00266914	SSTP_0001231400	68.9655
SRAE_2000460000	PC1	0.027	A0A090LP40	Metalloendopeptidase	EGF-like_dom, Peptidase_M12A, Peptidase_Metallo, EGF-like_CS, MetalloPept_cat_dom_sf	zinc ion binding, metalloendopeptidase activity, metallopeptidase activity, proteolysis, metal ion binding, hydrolase activity, peptidase activity			WBGene00264832	SSTP_0000537900	54.4737	SPAL_0001560700	41.3158
SRAE_X000191900	PC1	0.027	A0A090KRS7		NA	NA			WBGene00267496
SRAE_1000116300	PC1	0.027	A0A090KZP1	Heat shock protein 83	Hsp90_fam, HATPase_C, Heat_shock_protein_90_CS, Ribosomal_S5_D2-typ_fold, Hsp90_N, HATPase_C_sf, HSP90_C	unfolded protein binding, protein folding, ATP binding	hsp-90	75.7184	WBGene00257766	SSTP_0000020900	97.5575	SPAL_0001592000	93.5345
SRAE_X000222400	PC1	0.027	A0A090KSJ6		NA	NA			WBGene00267804
SRAE_2000500000	PC1	0.027	A0A090N0A9		NA	NA			WBGene00265251
SRAE_2000490000	PC1	0.027	D2DS74	Aspartic peptidase family and Aspartic peptidase domain-containing protein	Aspartic_peptidase_A1, Aspartic_peptidase_AS, Peptidase_aspartic_dom_sf, PEPTIDASE_A1, Pepsin-like_dom	aspartic-type endopeptidase activity, proteolysis, hydrolase activity, peptidase activity			WBGene00265147	SSTP_0000164700	60.9819
SRAE_2000125100	PC1	0.027	A0A090LEK7	CAP domain-containing protein	CAP_sf	NA			WBGene00261453
SRAE_0000078800	PC1	0.027	A0A090L2J3		NA	NA			WBGene00256547
SRAE_2000522700	PC1	0.027	A0A090N0F6	Trypsin Inhibitor-like, cysteine rich domain-containing protein	TIL_dom, Ser_inhib-like_sf	NA			WBGene00265487	SSTP_0001149700	38.009	SPAL_0000413700	33.9367
SRAE_2000077000	PC1	0.027	A0A090LEZ1	CAP domain-containing protein	CRISP-related, CAP_domain, CAP_sf	NA	F09B9.5	16.0714	WBGene00260970	SSTP_0000803000	22.8571
SRAE_2000461200	PC1	0.027	A0A090LQU8		NA	NA			WBGene00264844
SRAE_2000124700	PC1	0.027	A0A090MY52	CAP domain-containing protein	CAP_sf	membrane, integral component of membrane			WBGene00261449	SSTP_0000353200	38.9937
SRAE_2000076800	PC1	0.027	A0A090LD77	CAP domain-containing protein	CRISP-related, CAP_domain, CAP_sf	NA	scl-12	12.2047	WBGene00260968	SSTP_0000517900	42.9134
SRAE_X000191700	PC1	0.026	A0A090MPX9		NA	NA			WBGene00267494
SRAE_2000422700	PC1	0.026	A0A090MZV2	Metalloendopeptidase	Peptidase_M12A, Peptidase_Metallo, MetalloPept_cat_dom_sf, Sperma_CUB_dom_sf	zinc ion binding, metalloendopeptidase activity, metallopeptidase activity, proteolysis, metal ion binding, hydrolase activity, peptidase activity			WBGene00264456			SPAL_0000323500	54.7739
SRAE_1000182500	PC1	0.026	A0A090L7R7	CAP domain-containing protein	CAP_domain, CAP_sf	NA			WBGene00258434
SRAE_2000125600	PC1	0.026	A0A090LEL0	CAP domain-containing protein	CAP_sf	NA			WBGene00261458
SRAE_1000045900	PC1	0.026	A0A090KXI7	CAP domain-containing protein	CAP_domain, CAP_sf	NA			WBGene00257055	SSTP_0000990100	42.5532	SPAL_0000974300	28.7234
SRAE_0000021800	PC1	0.026	A0A090MS59		NA	NA			WBGene00255958
SRAE_2000528200	PC1	0.026	A0A090LR60	Zinc metalloproteinase	EGF-like_dom, CUB_dom, Peptidase_M12A, Peptidase_Metallo, EGF-like_CS, Metallopeptidase_nem, Astacin-like_dom, Sperma_CUB_dom_sf	molting cycle, collagen and cuticulin-based cuticle, zinc ion binding, metalloendopeptidase activity, metallopeptidase activity, proteolysis, extracellular region			WBGene00265542	SSTP_0000165200	66.2526	SPAL_0000399500	48.0331
SRAE_X000222500	PC1	0.026	A0A090KSV3		NA	NA			WBGene00267805
SRAE_2000379600	PC1	0.026	A0A090LNP5	Kelch-like protein diablo	BTB/POZ_dom, Kelch_1, Gal_Oxase/kelch_b-propeller, SKP1/BTB/POZ_sf, Kelch-typ_b-propeller	protein binding			WBGene00264022	SSTP_0000419300	61.7117	SPAL_0000320500	48.9865
SRAE_X000051700	PC1	0.026	A0A090LN03		NA	NA			WBGene00266076	SSTP_0000522600	35.8621
SRAE_0000025700	PC1	0.026	A0A090MSA1	Transthyretin-like family-containing protein	Transthyretin-like	extracellular space			WBGene00255998	SSTP_0001043200	30
SRAE_X000240300	PC1	0.026	A0A090KT48	Prolyl endopeptidase	Peptidase_S9, Peptidase_S9A, EF_Hand_1_Ca_BS, Pept_S9A_N, AB_hydrolase	serine-type exopeptidase activity, serine-type endopeptidase activity, serine-type peptidase activity, proteolysis			WBGene00267989	SSTP_0000670700	49.0654
SRAE_2000526300	PC1	0.026	A0A090N0G3		NA	NA			WBGene00265523
SRAE_0000071120	PC1	0.026			NA	NA				SSTP_0000965100	36.8902
SRAE_2000124500	PC1	0.026	A0A090LA09	CAP domain-containing protein	CAP_sf	membrane, integral component of membrane			WBGene00261447	SSTP_0001131600	24
SRAE_2000325600	PC1	0.026	A0A090LM10	Metalloendopeptidase	Peptidase_M12A, EGF-like_CS, MetalloPept_cat_dom_sf	metalloendopeptidase activity, metallopeptidase activity, proteolysis, metal ion binding, hydrolase activity, peptidase activity			WBGene00263477	SSTP_0000955300	46.2141	SPAL_0000010900	43.8642
SRAE_2000141900	PC1	0.026	A0A090LF55	Forkhead box protein P3	Fork_head_dom, TF_fork_head_CS_2, FOXP-CC, WH-like_DNA-bd_sf, WH_DNA-bd_sf	DNA-binding transcription factor activity, regulation of transcription, DNA-templated, sequence-specific DNA binding, DNA binding, nucleus			WBGene00261624	SSTP_0000057900	46.8434	SPAL_0001702900	43.3081
SRAE_2000499910	PC1	0.025	A0A090MFT3		NA	membrane, integral component of membrane			WBGene00265249
SRAE_2000126100	PC1	0.025	A0A090LEL3		NA	NA			WBGene00261464
SRAE_2000456800	PC1	0.025	A0A090LJA6		NA	NA			WBGene00264800	SSTP_0000384700	50.3067	SPAL_0000370500	33.1288
SRAE_X000169900	PC1	0.025	A0A090MPC8		NA	membrane, integral component of membrane			WBGene00267274
SRAE_0000082400	PC1	0.025	A0A090L2P6		NA	NA			WBGene00256584	SSTP_0000838900	25.1282
SRAE_1000043900	PC1	0.025	A0A090KXE1		Helicase_C, DNA/RNA_helicase_DEAH_CS, Helicase-assoc_dom, DEAD/DEAH_box_helicase_dom, Helicase_ATP-bd, P-loop_NTPase	helicase activity, ATP binding, nucleic acid binding, nucleotide binding, hydrolase activity	rha-1	27.4112	WBGene00257035	SSTP_0000527600	54.5178
SRAE_2000508100	PC1	0.025	A0A090LL58		NA	NA			WBGene00265335
SRAE_X000218800	PC1	0.025	A0A090KSF7		NA	NA			WBGene00267766
SRAE_0000073100	PC1	0.025	A0A090L2C0	Metalloendopeptidase	Peptidase_M12A, Peptidase_Metallo, EGF-like_CS, MetalloPept_cat_dom_sf	zinc ion binding, metalloendopeptidase activity, metallopeptidase activity, proteolysis, metal ion binding, hydrolase activity, peptidase activity			WBGene00256488	SSTP_0000965100	41.0448
SRAE_X000025600	PC1	0.025	A0A090LMF5	Zinc metalloproteinase	EGF-like_dom, Peptidase_M12A, Peptidase_Metallo, EGF-like_CS, Metallopeptidase_nem, Astacin-like_dom	molting cycle, collagen and cuticulin-based cuticle, zinc ion binding, metalloendopeptidase activity, metallopeptidase activity, proteolysis, extracellular region			WBGene00265812			SPAL_0001762400	32.4597
SRAE_0000008100	PC1	0.025	A0A090L0C0	Sulfotransferase family-containing protein	Sulfotransferase, Chst-1	positive regulation of response to oxidative stress, chondroitin sulfate biosynthetic process, chondroitin 4-sulfotransferase activity, integral component of membrane, sulfotransferase activity, transferase activity			WBGene00255818	SSTP_0000380700	48.3333	SPAL_0000411400	53.8095
SRAE_2000126300	PC1	0.025	A0A0R3V856		NA	NA			WBGene00261466
SRAE_2000466900	PC1	0.025	A0A090LJM2	Metalloendopeptidase	Peptidase_M12A, Peptidase_Metallo, MetalloPept_cat_dom_sf, Astacin-like_dom	zinc ion binding, metalloendopeptidase activity, metallopeptidase activity, proteolysis, metal ion binding, hydrolase activity, peptidase activity			WBGene00264905	SSTP_0000964900	53.7246
SRAE_2000136500	PC1	0.025	A0A090LF06		NA	NA			WBGene00261569
SRAE_2000527500	PC1	0.025	A0A090LLG4	CAP domain-containing protein	CAP_domain, CAP_sf	NA			WBGene00265535	SSTP_0001018700	45.8746	SPAL_0000870000	21.7822
SRAE_0000028800	PC1	0.025	A0A090KUI3		NA	membrane, integral component of membrane			WBGene00256030
SRAE_1000321400	PC1	0.025	A0A090L579	Prolyl endopeptidase	Peptidase_S9, Peptidase_S9A, Pept_S9A_N, AB_hydrolase	serine-type exopeptidase activity, serine-type endopeptidase activity, serine-type peptidase activity, proteolysis			WBGene00259831	SSTP_0000894300	55.624
SRAE_1000029800	PC1	0.025	A0A090L1M6	Nuclear RNA export factor 2	Nuclear_transport_factor_2_euk, NXF_fam, LRR_dom_sf, NTF2-like_dom_sf	NA	nxf-1	25.046	WBGene00256892	SSTP_0000447400	52.8545	SPAL_0000636900	45.3039
SRAE_2000290100	PC1	0.025	A0A090LJF7	Metalloendopeptidase	EGF-like_dom, Peptidase_M12A, Peptidase_Metallo, EGF-like_CS, MetalloPept_cat_dom_sf, Sperma_CUB_dom_sf	zinc ion binding, metalloendopeptidase activity, metallopeptidase activity, proteolysis, membrane, integral component of membrane, metal ion binding, hydrolase activity, peptidase activity			WBGene00263116	SSTP_0000965610	33.813	SPAL_0000583700	29.4964
SRAE_1000043800	PC1	0.025	A0A090L3X2		NA	NA			WBGene00257034
SRAE_2000499710	PC1	0.025	A0A090MJU7		NA	membrane, integral component of membrane			WBGene00265246
SRAE_1000061800	PC1	0.025	A0A090KXV1		NA	NA			WBGene00257215	SSTP_0001063200	51.3339	SPAL_0001613200	43.0073
SRAE_0000047400	PC1	0.025			NA	NA				SSTP_0000363500	47.5124	SPAL_0000010900	40.2985
SRAE_2000378700	PC1	0.025	I1XAZ7	Low-density lipoprotein (LDL) receptor class A repeat-containing protein; Low-density lipoprotein (LDL) receptor class A repeat-containing protein; SR01000; SR01000	LDrepeatLR_classA_rpt, LDL_receptor-like_sf	protein binding, membrane, integral component of membrane	egg-1	33.1023	WBGene00264012	SSTP_0000776200	79.3761	SPAL_0001380700	61.0052
SRAE_X000227200	PC1	0.024	A0A090KSQ5		NA	NA			WBGene00267854	SSTP_0001052700	44.6154
SRAE_2000495500	PC1	0.024	A0A090LKI3	Metalloendopeptidase	EGF-like_dom, Peptidase_M12A, EGF-like_CS, MetalloPept_cat_dom_sf, NAS-36	molting cycle, collagen and cuticulin-based cuticle, metalloendopeptidase activity, metallopeptidase activity, proteolysis, metal ion binding, hydrolase activity, peptidase activity	hch-1	21.5789	WBGene00265202	SSTP_0000955400	47.3684
SRAE_0000072400	PC1	0.024	A0A090L0E9	Reverse transcriptase domain and Integrase, catalytic core domain and Ribonuclease H-like domain and Peptidase A2A, retrovirus RVP subgroup domain and Aspartic peptidase domain-containing protein	RT_dom, Integrase_cat-core, Aspartic_peptidase_AS, RNaseH-like_sf, Peptidase_aspartic_dom_sf, RNaseH_sf, RT_RNaseH_2, Integrase_H2C2	aspartic-type endopeptidase activity, DNA integration, proteolysis, nucleic acid binding, RNA-directed DNA polymerase activity, RNA-dependent DNA biosynthetic process			WBGene00256481	SSTP_0000986300	9.44777	SPAL_0000727100	14.5043
SRAE_2000478500	PC1	0.024	A0A090N066	CAP domain-containing protein	CRISP-related, V5_allergen-like, CAP_domain, CAP_sf	NA	F09B9.5	18.4874	WBGene00265029	SSTP_0001110400	54.2017
SRAE_X000051900	PC1	0.024	A0A090LSN6		NA	NA			WBGene00266078	SSTP_0000522700	39.0071
SRAE_2000076600	PC1	0.024	A0A090L8J4	CAP domain-containing protein	CAP_domain, CAP_sf	NA	scl-12	13.1579	WBGene00260966			SPAL_0000705800	24.4361
SRAE_2000523800	PC1	0.024	A0A090LSM9	Zinc metalloproteinase	Peptidase_M12A, Peptidase_Metallo, EGF-like_CS, Metallopeptidase_nem, Astacin-like_dom	molting cycle, collagen and cuticulin-based cuticle, zinc ion binding, metalloendopeptidase activity, metallopeptidase activity, proteolysis, extracellular region			WBGene00265498
SRAE_X000225300	PC1	0.024	A0A090KSN1		NA	NA			WBGene00267834
SRAE_X000089400	PC1	0.024	A0A090LNY1	STAT transcription factor, all-alpha domain-containing protein	NA	NA			WBGene00266456	SSTP_0000679000	66.2162	SPAL_0001662500	56.7568
SRAE_2000290510	PC1	0.024	A0A090MLM6	Metalloendopeptidase	EGF-like_dom, CUB_dom, Peptidase_M12A, Peptidase_Metallo, EGF-like_CS, MetalloPept_cat_dom_sf, Sperma_CUB_dom_sf	zinc ion binding, metalloendopeptidase activity, metallopeptidase activity, proteolysis, membrane, integral component of membrane, metal ion binding, hydrolase activity, peptidase activity			WBGene00263122	SSTP_0000965610	35.4916	SPAL_0000583700	28.5372
SRAE_2000076900	PC1	0.024	A0A090MXV6	CAP domain-containing protein	CAP_domain, CAP_sf	NA	F09B9.5	15.7143	WBGene00260969	SSTP_0000803000	23.2143
SRAE_2000420600	PC1	0.024	A0A090LN05		NA	NA			WBGene00264435
SRAE_2000525700	PC1	0.024	A0A0R3VJM0	Metalloendopeptidase	Peptidase_M12A, Peptidase_Metallo, MetalloPept_cat_dom_sf	zinc ion binding, metalloendopeptidase activity, metallopeptidase activity, proteolysis, metal ion binding, hydrolase activity, peptidase activity			WBGene00265517	SSTP_0000965610	43.1095	SPAL_0000583700	35.3357
SRAE_0000000300	PC1	0.024	A0A090KTX6		NA	NA			WBGene00255740	SSTP_0000166800	51.2987
SRAE_2000126000	PC1	0.024	A0A090LA28	CAP domain-containing protein	NA	NA			WBGene00261463
SRAE_2000289400	PC1	0.024	A0A090LEQ2	Nematode fatty acid retinoid binding family-containing protein	Gp-FAR-1	lipid binding			WBGene00263108	SSTP_0000756500	82.7778	SPAL_0000883700	81.1111
SRAE_0000058600	PC1	0.024	A0A090L002		NA	NA			WBGene00256332	SSTP_0000828800	33.3333
SRAE_1000065800	PC1	0.024	A0A090KXY7	Malic enzyme	Malic_OxRdtase, Malic_N_dom, Malic_NAD-bd, Malic_enzyme_CS, NAD(P)-bd_dom_sf, Malic_N_dom_sf	malic enzyme activity, malate dehydrogenase (decarboxylating) (NAD+) activity, NAD binding, oxidation-reduction process, metal ion binding, oxidoreductase activity	men-1	65.3061	WBGene00257255	SSTP_0000135300	84.1444	SPAL_0000229000	84.7724
SRAE_2000497200	PC1	0.024	A0A090LQ86	Metalloendopeptidase	Peptidase_M12A, MetalloPept_cat_dom_sf	metalloendopeptidase activity, metallopeptidase activity, proteolysis, membrane, integral component of membrane, metal ion binding, hydrolase activity, peptidase activity			WBGene00265219	SSTP_0000955300	47.2727	SPAL_0000010900	42.8571
SRAE_2000475000	PC1	0.024	A0A090LK73	Remodeling and spacing factor 1	Znf_PHD, Znf_FYVE_PHD, Znf_RING/FYVE/PHD, Znf_PHD-finger, Rsf-1	RSF complex, regulation of transcription, DNA-templated, metal ion binding			WBGene00264992	SSTP_0001210600	85.3721	SPAL_0001618000	78.3576
SRAE_X000052000	PC1	0.024	A0A090N0S4		NA	membrane, integral component of membrane			WBGene00266079	SSTP_0000522500	56.6176
SRAE_2000451600	PC1	0.024	A0A090N010	Transthyretin-like family-containing protein	Transthyretin-like	extracellular space			WBGene00264748	SSTP_0000365900	40.3727	SPAL_0001248050	41.6149
SRAE_0000081600	PC1	0.024	A0A090KWE4	CAP domain-containing protein	CAP_domain, CAP_sf	NA			WBGene00256576
SRAE_2000490110	PC1	0.024	A0A090LKP1	Aspartic peptidase family and Aspartic peptidase domain-containing protein	Aspartic_peptidase_A1, Aspartic_peptidase_AS, Peptidase_aspartic_dom_sf, PEPTIDASE_A1, Pepsin-like_dom	aspartic-type endopeptidase activity, proteolysis, hydrolase activity, peptidase activity			WBGene00265148	SSTP_0000164700	61.4987
SRAE_X000037900	PC1	0.023	A0A090LS63		NA	NA			WBGene00265938
SRAE_2000124600	PC1	0.023	A0A090LEK2	CAP domain-containing protein	CAP_sf	NA			WBGene00261448	SSTP_0001131600	28.9902
SRAE_2000125400	PC1	0.023	A0A090L9Y4	CAP domain-containing protein	CAP_sf	NA			WBGene00261456
SRAE_2000524000	PC1	0.023	A0A090LLL6	Metalloendopeptidase	CUB_dom, Peptidase_M12A, Peptidase_Metallo, EGF-like_CS, MetalloPept_cat_dom_sf, Sperma_CUB_dom_sf	zinc ion binding, metalloendopeptidase activity, metallopeptidase activity, proteolysis, membrane, integral component of membrane, metal ion binding, hydrolase activity, peptidase activity			WBGene00265500	SSTP_0000966220	46.1165	SPAL_0001230700	36.165
SRAE_2000527700	PC1	0.023	A0A090LR54	CAP domain-containing protein	CAP_domain, CAP_sf	NA			WBGene00265537	SSTP_0001018800	29.1391	SPAL_0000870000	19.2053
SRAE_1000183100	PC1	0.023	A0A0R3UZK1		CRISP-related, CAP_domain, CAP_sf	NA			WBGene00258441
SRAE_X000147200	PC1	0.023	A0A090KWY9	Metalloendopeptidase	Peptidase_M12A, Peptidase_Metallo, MetalloPept_cat_dom_sf	zinc ion binding, metalloendopeptidase activity, metallopeptidase activity, proteolysis, membrane, integral component of membrane, metal ion binding, hydrolase activity, peptidase activity	nas-38	20	WBGene00267044	SSTP_0000633100	18.3333	SPAL_0000938500	38.5714
SRAE_2000453900	PC1	0.023	A0A090LJK3	Metalloendopeptidase	Peptidase_M12A, Peptidase_Metallo, MetalloPept_cat_dom_sf	zinc ion binding, metalloendopeptidase activity, metallopeptidase activity, proteolysis, metal ion binding, hydrolase activity, peptidase activity			WBGene00264771	SSTP_0000961900	55.8974	SPAL_0000629300	48.9744
SRAE_2000499400	PC1	0.023	A0A090LRZ6		NA	membrane, integral component of membrane			WBGene00265242
SRAE_X000050900	PC1	0.023	A0A090LSJ3		NA	membrane, integral component of membrane			WBGene00266068	SSTP_0001095700	34.6154
SRAE_0000027400	PC1	0.023	A0A090KUQ8	Metalloendopeptidase	CUB_dom, Peptidase_M12A, Peptidase_Metallo, EGF-like_CS, MetalloPept_cat_dom_sf, Sperma_CUB_dom_sf	zinc ion binding, metalloendopeptidase activity, metallopeptidase activity, proteolysis, membrane, integral component of membrane, metal ion binding, hydrolase activity, peptidase activity			WBGene00256016
SRAE_2000524100	PC1	0.023	A0A090LR14	Zinc metalloproteinase	EGF-like_dom, Peptidase_M12A, Peptidase_Metallo, EGF-like_CS, Metallopeptidase_nem, MetalloPept_cat_dom_sf, Astacin-like_dom, Sperma_CUB_dom_sf	molting cycle, collagen and cuticulin-based cuticle, zinc ion binding, metalloendopeptidase activity, metallopeptidase activity, proteolysis, metal ion binding, extracellular region, hydrolase activity, peptidase activity			WBGene00265501	SSTP_0000966210	63.0612
SRAE_2000512200	PC1	0.023	A0A090LQN5		NA	NA			WBGene00265376	SSTP_0000942100	26.7857
SRAE_2000125810	PC1	0.023	A0A090MFS0	CAP domain-containing protein	CAP_sf	NA			WBGene00261461
SRAE_2000453300	PC1	0.023	A0A090LJ78	Metalloendopeptidase	Peptidase_M12A, Peptidase_Metallo, EGF-like_CS, MetalloPept_cat_dom_sf	zinc ion binding, metalloendopeptidase activity, metallopeptidase activity, proteolysis, membrane, integral component of membrane, metal ion binding, hydrolase activity, peptidase activity			WBGene00264765	SSTP_0000942000	33.5979	SPAL_0000129200	12.6984
SRAE_2000497500	PC1	0.023	A0A090LKJ7	Metalloendopeptidase	Peptidase_M12A, Peptidase_Metallo, EGF-like_CS, MetalloPept_cat_dom_sf	zinc ion binding, metalloendopeptidase activity, metallopeptidase activity, proteolysis, metal ion binding, hydrolase activity, peptidase activity			WBGene00265222	SSTP_0000955300	46.7532	SPAL_0000010900	42.0779
SRAE_2000125200	PC1	0.023	A0A090MY53	CAP domain-containing protein	CAP_sf	NA			WBGene00261454
SRAE_0000071100	PC1	0.023			NA	NA				SSTP_0000965100	35.1759
SRAE_2000522800	PC1	0.023	A0A090LSL7	Trypsin Inhibitor-like, cysteine rich domain-containing protein	TIL_dom, Ser_inhib-like_sf	NA			WBGene00265488	SSTP_0001149700	37.4429	SPAL_0000413700	33.3333
SRAE_X000027300	PC1	0.023	A0A090N0M4		NA	NA			WBGene00265829
SRAE_X000259900	PC1	0.023	A0A090KYB3	Metalloendopeptidase	Peptidase_M12A, Peptidase_Metallo, EGF-like_CS, MetalloPept_cat_dom_sf	zinc ion binding, metalloendopeptidase activity, metallopeptidase activity, proteolysis, metal ion binding, hydrolase activity, peptidase activity			WBGene00268186	SSTP_0001118700	67.7582	SPAL_0001597300	46.3476
SRAE_X000222100	PC1	0.022	A0A090KX80		NA	NA			WBGene00267798
SRAE_X000195300	PC1	0.022	A0A090KYF7	Acetylcholinesterase	CarbesteraseB, AB_hydrolase	NA			WBGene00267530	SSTP_0000496000	48.537	SPAL_0000136300	38.0379
SRAE_2000497400	PC1	0.022	A0A090LRX7	Metalloendopeptidase	Peptidase_M12A, MetalloPept_cat_dom_sf	metalloendopeptidase activity, metallopeptidase activity, proteolysis, metal ion binding, hydrolase activity, peptidase activity			WBGene00265221	SSTP_0000955300	45.1444	SPAL_0000010900	41.7323
SRAE_2000527200	PC1	0.022	A0A090LR48	CAP domain-containing protein	CAP_domain, CAP_sf	NA			WBGene00265532	SSTP_0001018900	45.7237	SPAL_0000870000	25
SRAE_1000216300	PC1	0.022	A0A090L2I2		NA	NA			WBGene00258777
SRAE_X000063000	PC1	0.022	A0A090N0U6	Carboxylic ester hydrolase	Cholinesterase, CarbesteraseB, Carboxylesterase_B_AS, AB_hydrolase	cholinesterase activity, hydrolase activity			WBGene00266189	SSTP_0000670900	56.5144	SPAL_0000325200	59.2217
SRAE_X000104500	PC1	0.022	A0A090KPK4		NA	NA			WBGene00266608
SRAE_1000314300	PC1	0.022	A0A090LBI9	RecF/RecN/SMC, N-terminal domain and SMCs flexible hinge domain and P-loop containing nucleoside triphosphate hydrolase domain-containing protein	RecF/RecN/SMC_N, SMC_hinge, P-loop_NTPase, SMC_hinge_sf	chromosome, chromosome organization, protein binding, ATP binding, hydrolase activity			WBGene00259760
SRAE_1000059700	PC1	0.022	A0A090L4C5	Phosphate-regulating neutral endopeptidase	Peptidase_M13, Peptidase_M13_C, MetalloPept_cat_dom_sf	metalloendopeptidase activity, metallopeptidase activity, proteolysis			WBGene00257194	SSTP_0000528200	47.5584	SPAL_0001644500	42.0382
SRAE_X000062800	PC1	0.022	A0A090LNH8	Carboxylic ester hydrolase	Cholinesterase, CarbesteraseB, Carboxylesterase_B_AS, AB_hydrolase	cholinesterase activity, hydrolase activity			WBGene00266187	SSTP_0000670900	60.3066	SPAL_0000325200	60.9881
SRAE_2000070500	PC1	0.022	A0A0R3V6J5		CRISP-related, CAP_domain, Allrgn_V5/Tpx1_CS, SCP_GAPR1-like, CAP_sf	extracellular region	scl-13	15.0602	WBGene00260903	SSTP_0000512800	46.988	SPAL_0001714900	34.9398
SRAE_2000125800	PC1	0.022	A0A090LGD8	CAP domain-containing protein	CAP_sf	NA			WBGene00261460
SRAE_X000225000	PC1	0.022	A0A090KXA7		NA	NA			WBGene00267831	SSTP_0000273900	56	SPAL_0000714425	43.2
SRAE_X000052300	PC1	0.022	A0A090LNA8		NA	NA			WBGene00266082
SRAE_X000128100	PC1	0.022	A0A090KQ75		NA	NA			WBGene00266848
SRAE_X000065800	PC1	0.022	A0A090LNK3	Transthyretin-like family-containing protein	Transthyretin-like	extracellular space			WBGene00266217
SRAE_X000195800	PC1	0.022	A0A090MQ19		NA	NA			WBGene00267534
SRAE_2000077400	PC1	0.022	A0A090MXV7	CAP domain-containing protein	CRISP-related, CAP_domain, CAP_sf	NA	F09B9.5	15.3571	WBGene00260974	SSTP_0000517800	33.9286
SRAE_0000028900	PC1	0.022	A0A090KUS7		NA	NA			WBGene00256031
SRAE_X000195900	PC1	0.022	A0A090KYG0		NA	NA			WBGene00267535
SRAE_X000031400	PC1	0.022	A0A090LMM0	Chitin binding domain-containing protein	Chitin-bd_dom, Chitin-bd_dom_sf	chitin metabolic process, chitin binding, extracellular region			WBGene00265872	SSTP_0001091500	79.5742	SPAL_0001609000	48.3034
SRAE_2000182600	PC1	0.022	A0A090LBM1	Kinesin, motor domain and P-loop containing nucleoside triphosphate hydrolase domain-containing protein	Kinesin_motor_dom, P-loop_NTPase, Kinesin-like_fam, Kinesin_motor_dom_sf	microtubule-based movement, microtubule binding, microtubule motor activity, ATP binding, nucleotide binding, hydrolase activity, motor activity			WBGene00262032	SSTP_0000119600	62.5337	SPAL_0001024100	57.2776
SRAE_X000065900	PC1	0.022	A0A090LSZ3		NA	NA			WBGene00266218
SRAE_2000126500	PC1	0.022	A0A090LA33		NA	NA			WBGene00261468
SRAE_X000147000	PC1	0.022	A0A090KV62		NA	NA			WBGene00267042
SRAE_0000081000	PC1	0.022	A0A090L2N5	Metalloendopeptidase	Peptidase_M12A, Peptidase_Metallo, MetalloPept_cat_dom_sf	zinc ion binding, metalloendopeptidase activity, metallopeptidase activity, proteolysis, metal ion binding, hydrolase activity, peptidase activity			WBGene00256570	SSTP_0000965100	42.4731
SRAE_1000083800	PC1	0.022	A0A090MV07	Charged multivesicular body protein 7	Snf7_fam	vacuolar transport	T24B8.2	21.9089	WBGene00257438	SSTP_0001190000	83.5141	SPAL_0000745900	80.4772
SRAE_1000029500	PC1	0.022	A0A090L3E2	Centrosomal protein of 97 kDa	Leu-rich_rpt, Leu-rich_rpt_typical-subtyp, LRR_dom_sf	protein binding			WBGene00256889	SSTP_0000447700	73.6487	SPAL_0000637100	68.7838
SRAE_1000328600	PC1	0.022	A0A090LA66		TPR-like_helical_dom_sf	protein binding			WBGene00259903
SRAE_1000022500	PC1	0.022	A0A090L378	Epidermal growth factor-like domain and C-type lectin domain and von Willebrand factor, type A domain and MD domain and C-type lectin-like domain and C-type lectin fold domain-containing protein	EGF-like_dom, C-type_lectin-like, VWF_A, MD_domain, EGF-like_CS, C-type_lectin-like/link_sf, CTDL_fold, vWFA_dom_sf	carbohydrate binding	ZK1193.2	20.0928	WBGene00256819	SSTP_0001199000	70.6264	SPAL_0001507800	57.3086
SRAE_2000076700	PC1	0.022	A0A090L8N0	CAP domain-containing protein	CRISP-related, CAP_domain, CAP_sf	NA			WBGene00260967	SSTP_0000803100	27.6364	SPAL_0000657200	22.5455
SRAE_2000460400	PC1	0.021	A0A090LJR7		NA	membrane, integral component of membrane			WBGene00264836
SRAE_2000063800	PC1	0.021	A0A090MXS9	ShKT domain-containing protein	ShKT_dom	NA			WBGene00260834	SSTP_0000242300	64.1593	SPAL_0000046100	45.1327
SRAE_2000290710	PC1	0.021	A0A090MFS4	Metalloendopeptidase	Peptidase_M12A, Peptidase_Metallo, EGF-like_CS, MetalloPept_cat_dom_sf, Sperma_CUB_dom_sf	zinc ion binding, metalloendopeptidase activity, metallopeptidase activity, proteolysis, metal ion binding, hydrolase activity, peptidase activity			WBGene00263125	SSTP_0000965610	32.7711	SPAL_0000583700	26.988
SRAE_0000001200	PC1	0.021	A0A090KTN1	Histidine phosphatase superfamily,clade-2-containing protein	His_Pase_clade-2, His_PPase_superfam, Acid_Pase_AS	NA			WBGene00255749	SSTP_0000957100	62.6289	SPAL_0001749700	48.7113
SRAE_1000050300	PC1	0.021	A0A090KXM1		NA	NA			WBGene00257100	SSTP_0001266900	42.5978	SPAL_0001419600	37.9888
SRAE_2000070700	PC1	0.021	A0A090LES3	Acetylcholinesterase	Cholinesterase, CarbesteraseB, AB_hydrolase	cholinesterase activity			WBGene00260905	SSTP_0000805000	57.1924	SPAL_0001229500	44.5407
SRAE_1000304800	PC1	0.021	A0A090LBB6	General transcription factor IIH subunit 1	BSD_dom, PH-like_dom_sf, TFIIH_BTF_p62_N, Tfb1/GTF2H1	transcription factor TFIIH core complex, nucleotide-excision repair, transcription, DNA-templated	gtf-2H1	29.8153	WBGene00259665	SSTP_0001218900	91.029	SPAL_0001245500	75.1979
SRAE_2000125700	PC1	0.021	A0A090MY54	CAP domain-containing protein	CAP_sf	NA			WBGene00261459
SRAE_2000126400	PC1	0.021	A0A090L9Z4		NA	NA			WBGene00261467
SRAE_0000056200	PC1	0.021	A0A090MSZ6		NA	NA			WBGene00256308
SRAE_2000417800	PC1	0.021	A0A1X9QLU5	Trypsin Inhibitor-like, cysteine rich domain-containing protein	EGF-like_dom, TIL_dom, Ser_inhib-like_sf	NA	Y69H2.10	16.4794	WBGene00264407	SSTP_0000214900	41.1985	SPAL_0001160500	48.5019
SRAE_2000325700	PC1	0.021	A0A090LFN4	Metalloendopeptidase	Peptidase_M12A, Peptidase_Metallo, MetalloPept_cat_dom_sf	zinc ion binding, metalloendopeptidase activity, metallopeptidase activity, proteolysis, metal ion binding, hydrolase activity, peptidase activity			WBGene00263478			SPAL_0001229900	21.8894
SRAE_1000081500	PC1	0.021	A0A090KYE0		NA	NA			WBGene00257415	SSTP_0001084200	41.2935	SPAL_0000350200	26.3682
SRAE_1000032200	PC1	0.021	A0A090KXA4		PAZ_dom, Piwi, RNaseH-like_sf, PAZ_dom_sf, RNaseH_sf	protein binding, nucleic acid binding, gene silencing by RNA			WBGene00256916	SSTP_0000345800	71.5402	SPAL_0000389400	62.9464
SRAE_2000495700	PC1	0.021	A0A090LQ75	Cystatin; Proteinase inhibitor I25, cystatin domain-containing protein	Cystatin_dom	cysteine-type endopeptidase inhibitor activity, membrane, integral component of membrane, negative regulation of endopeptidase activity			WBGene00265204	SSTP_0000385400	39.375
SRAE_0000077800	PC1	0.021	A0A090L2I4		NA	NA			WBGene00256537
SRAE_X000027200	PC1	0.021	A0A090LRW0		NA	NA			WBGene00265828
SRAE_0000056700	PC1	0.021	A0A090MT00	K-Cl co-transporter family and Amino acid permease/ SLC12A domain-containing protein	KCL_cotranspt, AA-permease/SLC12A_dom, SLC12_C, KCC3	integral component of plasma membrane, chloride transmembrane transport, cellular hypotonic salinity response, potassium:chloride symporter activity, ion transport, transporter activity, membrane, transmembrane transport, integral component of membrane, potassium ion transport, regulation of synaptic transmission, GABAergic, chloride transport, potassium ion transmembrane transport	kcc-2	56.5954	WBGene00256313	SSTP_0000535400	95.3654	SPAL_0000561700	92.7807
SRAE_2000076400	PC1	0.021	A0A090MXV5	CAP domain-containing protein	CAP_domain, CAP_sf	NA			WBGene00260964	SSTP_0001039700	20.6278	SPAL_0001598200	21.0762
SRAE_X000225900	PC1	0.021	A0A090KXB4	Trypsin Inhibitor-like, cysteine rich domain-containing protein	TIL_dom, Ser_inhib-like_sf	NA			WBGene00267841
SRAE_2000159200	PC1	0.021	A0A090LAV5		NA	NA			WBGene00261797	SSTP_0000148500	75.4513	SPAL_0000839100	53.0686
SRAE_2000525800	PC1	0.021	A0A090N0G2	Astacin-like metalloendopeptidase	Peptidase_M12A, EGF-like_CS, MetalloPept_cat_dom_sf, Sperma_CUB_dom_sf	metalloendopeptidase activity, metallopeptidase activity, proteolysis			WBGene00265518	SSTP_0000965100	40
SRAE_X000050800	PC1	0.021	A0A090LN74		NA	membrane, integral component of membrane			WBGene00266067	SSTP_0001095700	34.9515
SRAE_2000524400	PC1	0.021	A0A090LLD0	Metalloendopeptidase	Peptidase_M12A, Peptidase_Metallo, EGF-like_CS, MetalloPept_cat_dom_sf	zinc ion binding, metalloendopeptidase activity, metallopeptidase activity, proteolysis, metal ion binding, hydrolase activity, peptidase activity			WBGene00265504	SSTP_0000965100	39.4541
SRAE_1000136100	PC1	0.021	A0A090L088		NA	NA			WBGene00257966	SSTP_0001208600	34.6375	SPAL_0001083700	18.0667
SRAE_2000124900	PC1	0.021	A0A090L9X8	CAP domain-containing protein	CAP_sf	NA			WBGene00261451
SRAE_1000128500	PC1	0.021	A0A090L672	RNA-binding protein 25	RRM_dom, PWI_dom, Nucleotide-bd_a/b_plait_sf, RBM25_RRM, RBD_domain_sf	mRNA processing, nucleic acid binding, RNA binding	rbm-25	27.5578	WBGene00257889	SSTP_0000550500	87.7888	SPAL_0000832900	83.9934
SRAE_X000143900	PC1	0.021	A0A090KQB8	Metalloendopeptidase	Peptidase_M12A, Peptidase_Metallo, MetalloPept_cat_dom_sf	zinc ion binding, metalloendopeptidase activity, metallopeptidase activity, proteolysis, membrane, integral component of membrane, metal ion binding, hydrolase activity, peptidase activity			WBGene00267008			SPAL_0000193200	44.4976
SRAE_1000274800	PC1	0.021	A0A090MWY5	Kalirin	DH-domain, CRAL-TRIO_dom, PH_domain, Spectrin_repeat, PH-like_dom_sf, Spectrin/alpha-actinin, TRIO, DBL_dom_sf, CRAL-TRIO_dom_sf	regulation of Rho protein signal transduction, Rho guanyl-nucleotide exchange factor activity, guanyl-nucleotide exchange factor activity, protein serine/threonine kinase activity, protein binding, axon guidance, central nervous system development			WBGene00259364	SSTP_0001205200	96.8282	SPAL_0000139600	94.9132
SRAE_2000300000	PC1	0.021	A0A090LF01	Zinc finger, C2H2 domain and Zinc finger C2H2-type/integrase DNA-binding domain and Zinc finger, C2H2-like domain-containing protein	Znf_C2H2_type, Znf_C2H2_sf	nucleic acid binding, DNA binding			WBGene00263219	SSTP_0000747200	88.8889	SPAL_0000309400	86.2884
SRAE_X000218900	PC1	0.021	A0A090KSR7		NA	NA			WBGene00267767
SRAE_X000144000	PC1	0.021	A0A090KQR8	Metalloendopeptidase	Peptidase_M12A, Peptidase_Metallo, MetalloPept_cat_dom_sf	zinc ion binding, metalloendopeptidase activity, metallopeptidase activity, proteolysis, metal ion binding, hydrolase activity, peptidase activity			WBGene00267009			SPAL_0000193200	44.2308
SRAE_0000045800	PC1	0.021	A0A090KZP6	Metalloendopeptidase	Peptidase_M12A, Peptidase_Metallo, MetalloPept_cat_dom_sf, Sperma_CUB_dom_sf	zinc ion binding, metalloendopeptidase activity, metallopeptidase activity, proteolysis, membrane, integral component of membrane, metal ion binding, hydrolase activity, peptidase activity			WBGene00256202	SSTP_0000965100	42.4757
SRAE_1000043500	PC1	0.021	A0A090KXM6		NA	NA			WBGene00257031	SSTP_0000527300	64.6341	SPAL_0000175700	53.1359
SRAE_X000027100	PC1	0.021	A0A090LMH3		NA	NA			WBGene00265827
SRAE_2000049500	PC1	0.021	I1XAZ5	SR00449	Cpg-3	NA	cpg-3	9.88201	WBGene00260690	SSTP_0000459200	21.5339	SPAL_0000485600	15.1917
SRAE_2000460600	PC1	0.02	A0A090N028	Alpha-mannosidase	Glyco_hydro_38_N, Gal_mutarotase_sf_dom, Glyco_hydro/deAcase_b/a-brl, Glyco_hydro_38_C, Glyco_hydro_b, Glyco_hydro_38_cen, Glyco_hydro_38_N_sf, Glyco_hydro_57/38_cen_sf, Glyco_hydro_38_cen_sf	carbohydrate metabolic process, carbohydrate binding, mannose metabolic process, alpha-mannosidase activity, catalytic activity, membrane, integral component of membrane, metal ion binding, hydrolase activity, metabolic process, hydrolase activity, acting on glycosyl bonds	aman-2	33.3641	WBGene00264838	SSTP_0000538700	77.4194	SPAL_0001739400	63.5023
SRAE_1000189700	PC1	0.02	A0A090L693	Protein-tyrosine phosphatase, receptor/non-receptor type domain and Protein-tyrosine/Dual specificity phosphatase domain and Protein-tyrosine phosphatase, catalytic domain-containing protein	PTPase_domain, TYR_PHOSPHATASE_dom, Tyr_Pase_cat, Prot-tyrosine_phosphatase-like	dephosphorylation, phosphatase activity, protein dephosphorylation, protein tyrosine phosphatase activity, hydrolase activity, peptidyl-tyrosine dephosphorylation	egg-3	25.7885	WBGene00258508
SRAE_X000051100	PC1	0.02	A0A090LUA4		NA	membrane, integral component of membrane			WBGene00266070	SSTP_0001095700	36.6197
SRAE_1000336500	PC1	0.02	A0A090L5W9	DNA polymerase eta	UmuC, DNA_pol_Y-fam_lit_finger_sf	damaged DNA binding, DNA repair	polh-1	18.1197	WBGene00259982	SSTP_0000603300	73.6752	SPAL_0000953900	67.6923
SRAE_1000291300	PC1	0.02	A0A090LAW5		NA	NA			WBGene00259530	SSTP_0000626100	77.7533	SPAL_0001119600	85.022
SRAE_0000000200	PC1	0.02	A0A090L065	ShKT domain-containing protein	ShKT_dom	NA			WBGene00255738	SSTP_0000166600	33.7607	SPAL_0000619600	28.2051
SRAE_2000522600	PC1	0.02	A0A090LQZ5	Trypsin Inhibitor-like, cysteine rich domain-containing protein	TIL_dom, Ser_inhib-like_sf	NA			WBGene00265486	SSTP_0001149700	39.0909	SPAL_0000413700	34.0909
SRAE_1000348100	PC1	0.02	A0A090LAV4	Fanconi anemia group J protein	DNA/RNA_helicase_DEAH_CS, Helicase-like_DEXD_c2, DEAD_2, Helic_SF1/SF2_ATP-bd_DinG/Rad3, P-loop_NTPase	ATP-dependent DNA helicase activity, hydrolase activity, acting on acid anhydrides, in phosphorus-containing anhydrides, DNA binding, ATP binding, DNA duplex unwinding			WBGene00260098
SRAE_2000487800	PC1	0.02	A0A090N085		NA	NA			WBGene00265125	SSTP_0000219000	62.2483	SPAL_0001156100	52.349
SRAE_X000191300	PC1	0.02	A0A090KY95		NA	NA			WBGene00267490	SSTP_0001052700	39.5349
SRAE_2000387600	PC1	0.02	A0A090LHH6		PAZ_dom, Piwi, RNaseH-like_sf, ArgoL1, ArgoL2, Argonaute_Mid_dom, Argonaute_N, PAZ_dom_sf, RNaseH_sf	protein binding, nucleic acid binding, gene silencing by RNA	alg-1	70.5882	WBGene00264103	SSTP_0000740600	88.3422	SPAL_0000005900	80
SRAE_2000169300	PC1	0.02	A0A090LFV4	HAP1, N-terminal domain-containing protein	HAP1_N	NA	trak-1	16.5823	WBGene00261899	SSTP_0000357000	63.1646	SPAL_0001628400	35.3165
SRAE_X000199400	PC1	0.02	A0A090KS91	Metalloendopeptidase	Peptidase_M12A, Peptidase_Metallo, MetalloPept_cat_dom_sf	zinc ion binding, metalloendopeptidase activity, metallopeptidase activity, proteolysis, metal ion binding, hydrolase activity, peptidase activity			WBGene00267572	SSTP_0000965100	42.394
SRAE_0000529700	PC1	0.02	A0A090KW53	Trypsin Inhibitor-like, cysteine rich domain-containing protein	TIL_dom, Ser_inhib-like_sf	NA			WBGene00256591
SRAE_2000147900	PC1	0.02	A0A090LFA0	Transcription factor AP-2	TF_AP2, TF_AP2_C	nucleus, DNA-binding transcription factor activity, regulation of transcription, DNA-templated	aptf-1	22.6592	WBGene00261684	SSTP_0000151700	93.0712	SPAL_0000913700	79.588
SRAE_2000458110	PC1	0.02	A0A090N023	Metalloendopeptidase	Peptidase_M12A, Peptidase_Metallo, MetalloPept_cat_dom_sf	zinc ion binding, metalloendopeptidase activity, metallopeptidase activity, proteolysis, metal ion binding, hydrolase activity, peptidase activity			WBGene00264813			SPAL_0001560700	36.4341
SRAE_2000072500	PC1	0.02			NA	NA						SPAL_0001549800	18.1818
SRAE_2000499210	PC1	0.02	A0A090MFX5		NA	NA			WBGene00265240
SRAE_2000492600	PC1	0.02	A0A090LKR0	N-acetyllactosaminide beta-1,3-N-acetylglucosaminyltransferase	NA	membrane, integral component of membrane, transferase activity, transferase activity, transferring glycosyl groups			WBGene00265173	SSTP_0000162100	64.8649	SPAL_0001246500	52.0885
SRAE_2000124200	PC1	0.02	A0A090MY51		NA	NA			WBGene00261444	SSTP_0001039400	37.4161
SRAE_1000066300	PC1	0.02	A0A090KXZ3		NA	NA			WBGene00257260			SPAL_0001543900	32.0197
SRAE_2000203600	PC1	0.02	A0A090LC72	DEP domain and Winged helix-turn-helix DNA-binding domain-containing protein	DEP_dom, WH-like_DNA-bd_sf, WH_DNA-bd_sf	intracellular signal transduction, DNA binding			WBGene00262243	SSTP_0000998900	83.288	SPAL_0001671600	83.8315
SRAE_2000080200	PC1	0.02			NA	NA				SSTP_0000770000	57.2414
SRAE_2000524610	PC1	0.02	A0A090N6B8	Metalloendopeptidase	Peptidase_M12A, Peptidase_Metallo, EGF-like_CS, MetalloPept_cat_dom_sf	zinc ion binding, metalloendopeptidase activity, metallopeptidase activity, proteolysis, metal ion binding, hydrolase activity, peptidase activity			WBGene00265506	SSTP_0000965100	41.1911
SRAE_1000264400	PC1	0.02	A0A090LA50	TLDc domain-containing protein	TLDc_dom	NA	Y39A3CL.4	34.3915	WBGene00259260	SSTP_0000597200	81.2169	SPAL_0000265500	77.5132
SRAE_2000296000	PC1	0.02	A0A090LEX3	Kinesin-like protein KIF15	Kinesin_motor_dom, P-loop_NTPase, Kinesin-like_fam, Kinesin_motor_dom_sf	microtubule-based movement, microtubule binding, microtubule motor activity, ATP binding, nucleotide binding, motor activity	klp-18	19.9125	WBGene00263179			SPAL_0001069800	61.7068
SRAE_2000151800	PC1	0.02	A0A090LAR8	Kinesin-like protein	Kinesin_motor_dom, Kinesin_motor_CS, P-loop_NTPase, Kinesin-like_fam, Kinesin_motor_dom_sf	microtubule-based movement, microtubule binding, microtubule motor activity, ATP binding, nucleotide binding, motor activity, microtubule	klp-7	30.8998	WBGene00261723	SSTP_0000138300	74.3633	SPAL_0000095300	60.4414
SRAE_2000476100	PC1	0.02	A0A090LPL0		PAZ_dom, Piwi, RNaseH-like_sf, PAZ_dom_sf, RNaseH_sf	protein binding, nucleic acid binding, gene silencing by RNA	wago-4	24.7323	WBGene00265003	SSTP_0001002200	63.5974	SPAL_0000971200	61.4561
SRAE_X000051000	PC1	0.02	A0A090N0S2		NA	NA			WBGene00266069	SSTP_0001095700	32.8704
SRAE_1000223500	PC1	0.02	A0A090MWN2	Chitin binding domain-containing protein	Chitin-bd_dom, Chitin-bd_dom_sf	chitin metabolic process, chitin binding, extracellular region	cbd-1	3.72831	WBGene00258849	SSTP_0001196900	66.6667
[truncated: 2,045 more rows]

## Sheet: S. papillosus
File S4. Top 10% of genes contributing to PCA identity in each Strongyloides species
[truncated: 3,177 more rows]

## Sheet: S. venezuelensis
File S4. Top 10% of genes contributing to PCA identity in each Strongyloides species
[truncated: 2,461 more rows]
