# Supplementary material
Source: publisher figshare collection journal article supplement (https://gsajournals.figshare.com/articles/dataset/_/14273627)
Supplement: Supplementary file 2 [file 2]

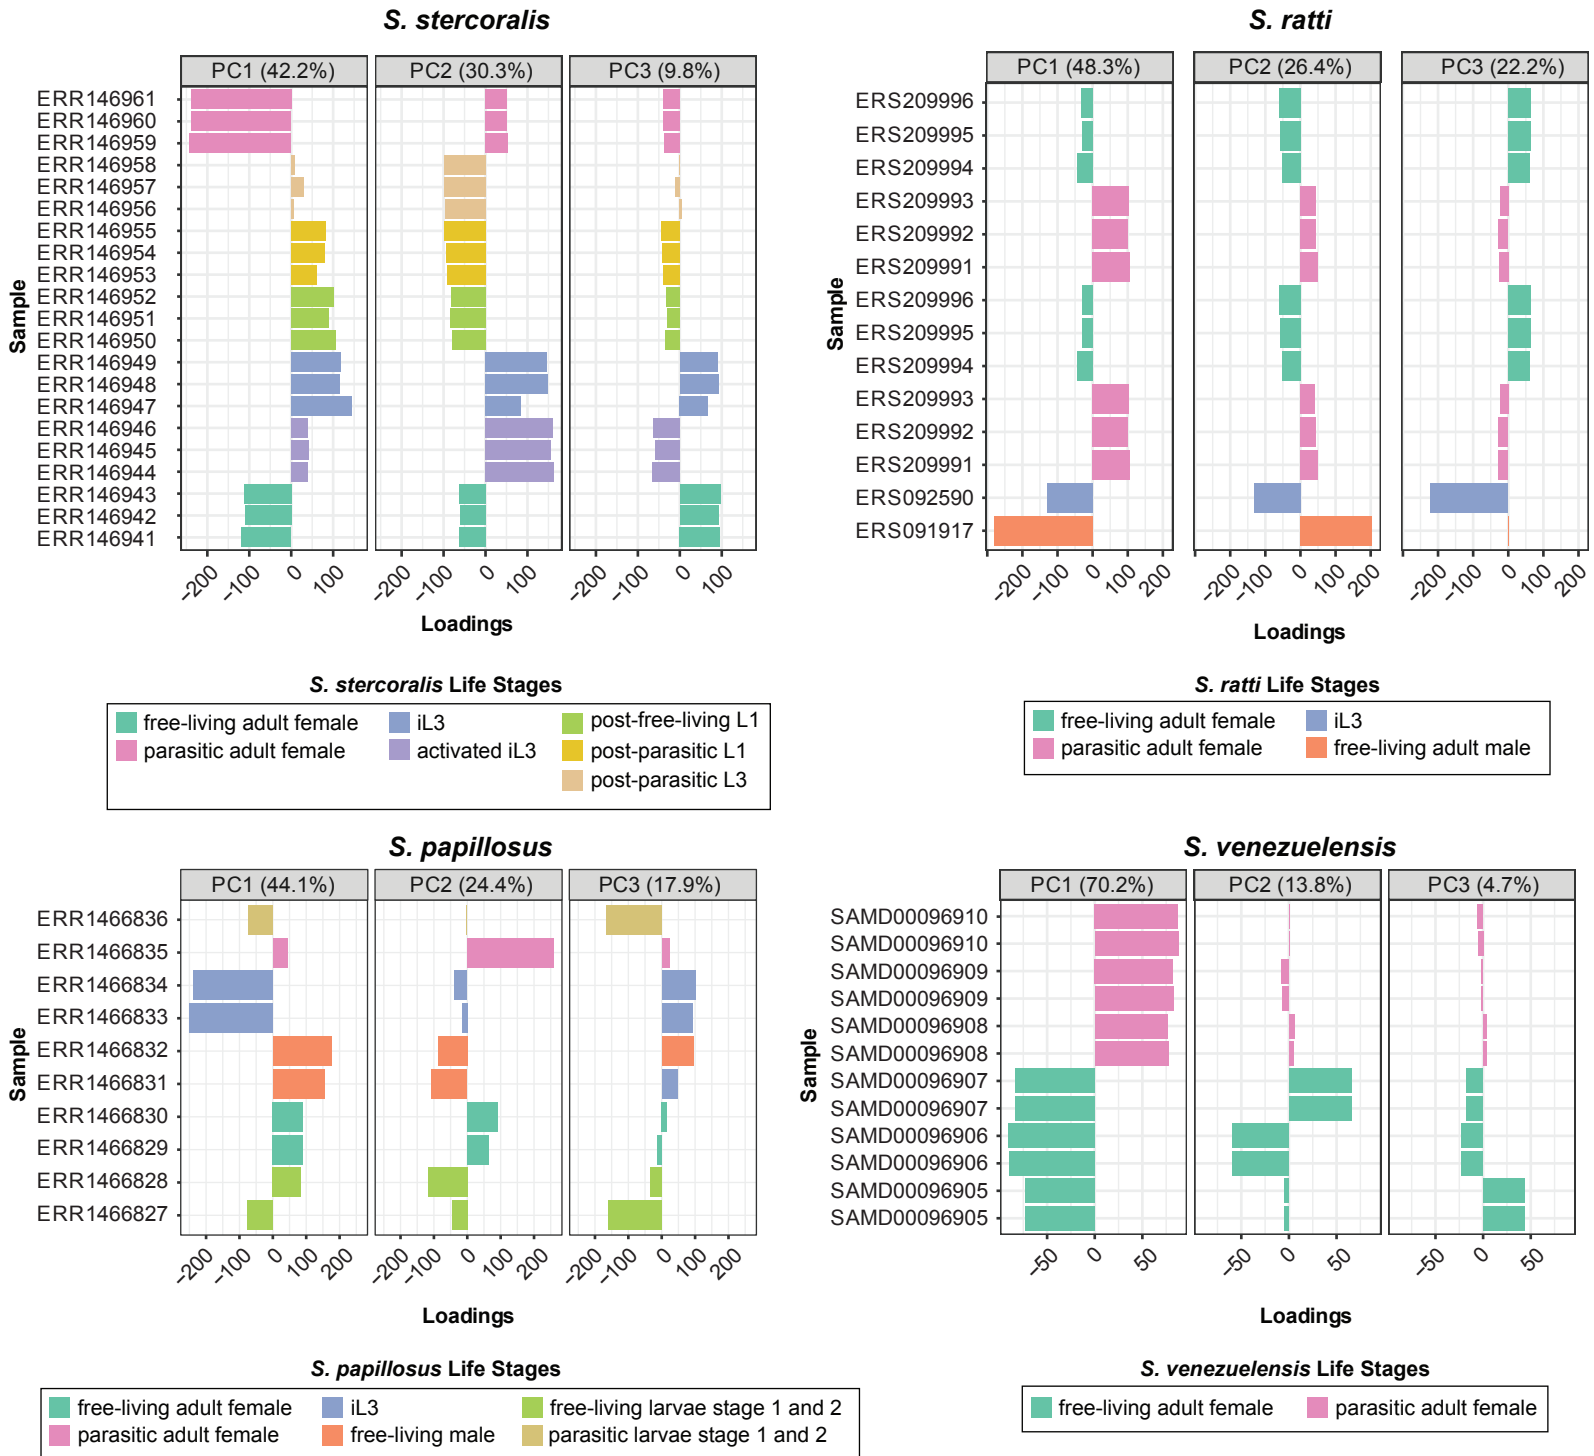

**Figure S5. Small multiples plot of the influence (i.e., PCA variable loadings) of the first 3 principal components on variation in individual samples.** Y-axis labels indicate biological sample names. Color indicates life stage. For each color group, unique sample names indicate separate biological replicates. For *S. ratti* and *S. venezuelensis*, plots contain repeated sample names which indicate technical replicates. Numerical values in the facet labels indicate percent of total variance explained by the plotted PC.
